# Supplementary material for: Chromatin-sensitive cryptic promoters putatively drive expression of alternative protein isoforms in yeast
Source: HighWire-hosted journal article supplement (doi:10.1101/gr.243378.118), 2019-11-18
Supplement: Supplemental_Table_S1.xlsx [file Supplemental_Table_S1.xlsx]

## Sheet: Sheet1
TSS_cluster	TSS_peak	Chr	start_cluster	end_cluster	strand	set2_log2FoldChange	set2_pvalue	set2_padj	eaf3_log2FoldChange	eaf3_pvalue	eaf3_padj	rco1_log2FoldChange	rco1_pvalue	rco1_padj	set1_log2FoldChange	set1_pvalue	set1_padj	rrp6_log2FoldChange	rrp6_pvalue	rrp6_padj
chrI:6319-6355:-	chrI:6331:-	chrI	6319	6355	-	-1.02596	0.0395155	0.269454	-0.874811	0.096008	0.352316	-0.00895246	0.984858	0.998319	0.723456	0.120535	0.501883	1.13119	0.0114725	0.0775543
chrI:9183-9191:-	chrI:9183:-	chrI	9183	9191	-	0.712676	0.597026	0.964064	-1.42044	0.447724	0.750532	0.0960153	0.946439	0.989265	3.07597	0.0155123	NA	2.86037	0.0229161	0.133247
chrI:9227-9257:-	chrI:9241:-	chrI	9227	9257	-	-3.64921	0.0279563	0.212143	-0.95465	0.403717	0.716847	-0.281352	0.78037	0.961044	2.22932	0.0152401	0.179381	1.96861	0.0301078	0.162893
chrI:11115-11167:-	chrI:11115:-	chrI	11115	11167	-	-0.00962034	0.993785	0.999954	-0.128271	0.924582	0.976847	1.00939	0.385112	0.804914	-0.231063	0.8656	0.969855	4.82718	5.72e-06	0.000113404
chrI:17840:-	chrI:17840:-	chrI	17840	17840	-	-0.632756	0.710543	0.984436	-2.00344	0.338871	NA	-0.892445	0.612059	NA	1.44928	0.368433	NA	-2.83806	0.171136	NA
chrI:20592:-	chrI:20592:-	chrI	20592	20592	-	-3.42976	0.162764	NA	-2.72615	0.267221	NA	-0.782279	0.726372	NA	2.02896	0.320183	NA	-0.749884	0.730284	NA
chrI:20780:-	chrI:20780:-	chrI	20780	20780	-	-0.466598	0.869562	NA	-1.25623	0.661125	NA	-1.75505	0.540259	NA	2.18045	0.397863	NA	2.85393	0.255859	NA
chrI:23627-23639:-	chrI:23633:-	chrI	23627	23639	-	-0.175716	0.841259	0.98946	0.338369	0.704066	0.892401	1.00165	0.226587	0.657131	0.0316853	0.972316	0.992605	2.90178	0.000221191	0.00291934
chrI:23791-23793:-	chrI:23793:-	chrI	23791	23793	-	-2.28081	0.156767	0.6237	-4.01799	0.0350804	0.200524	-1.0762	0.454975	0.850519	-1.61844	0.314994	NA	1.84316	0.145892	0.471956
chrI:23822:-	chrI:23822:-	chrI	23822	23822	-	-0.728262	0.596071	0.964007	-1.33322	0.399785	0.714595	-0.833311	0.554529	0.891921	0.305383	0.819766	NA	2.09776	0.0887264	0.346463
chrI:24744-24747:-	chrI:24747:-	chrI	24744	24747	-	0.585973	0.378605	0.880251	-0.206187	0.770841	0.922112	0.256626	0.704266	0.939907	-1.77833	0.0299408	0.260851	-3.64336	0.000159678	0.00220322
chrI:25020:-	chrI:25020:-	chrI	25020	25020	-	4.21979	0.173309	NA	0.257973	0.93926	NA	3.51968	0.260815	NA	0.22558	0.946875	NA	-0.639516	0.85017	NA
chrI:25518:-	chrI:25518:-	chrI	25518	25518	-	4.58763	0.0297764	NA	3.25479	0.145234	NA	3.20185	0.144055	NA	3.68392	0.0928016	NA	0.847351	0.733161	NA
chrI:28479:-	chrI:28479:-	chrI	28479	28479	-	-1.47646	0.557799	NA	0.256544	0.912022	NA	-2.68698	0.28938	NA	2.17612	0.311602	NA	-0.212883	0.925091	NA
chrI:29738-29776:-	chrI:29749:-	chrI	29738	29776	-	-0.483041	0.245212	0.761827	-0.463094	0.284533	0.616163	-0.110724	0.78835	0.96303	0.10942	0.793307	0.947962	2.01301	2.57e-07	6.65e-06
chrI:30755-30859:-	chrI:30814:-	chrI	30755	30859	-	-0.182175	0.700797	0.98254	-0.898789	0.119697	0.397763	0.809852	0.0683436	0.359265	0.623962	0.182129	0.590425	5.0311	4.9e-36	3.2e-33
chrI:30884-30934:-	chrI:30894:-	chrI	30884	30934	-	-0.11945	0.941393	0.995529	-0.0653457	0.969316	0.990399	1.149	0.459506	0.853008	0.0744356	0.964593	0.990153	5.94098	6.47e-05	0.000990314
chrI:31017-31025:-	chrI:31017:-	chrI	31017	31025	-	-0.437126	0.850107	0.98946	1.34819	0.518358	0.79617	0.782976	0.709108	0.94124	2.25909	0.251585	NA	5.03827	0.00631897	0.0486424
chrI:31442:-	chrI:31442:-	chrI	31442	31442	-	-2.70803	0.176153	0.662373	-1.05502	0.549694	NA	-1.48376	0.396289	NA	1.97214	0.178908	NA	-0.343149	0.823927	0.952839
chrI:31512:-	chrI:31512:-	chrI	31512	31512	-	0.16975	0.928244	NA	-0.714003	0.745068	NA	1.08317	0.55032	NA	2.1809	0.218838	NA	0.954363	0.594816	NA
chrI:31538:-	chrI:31538:-	chrI	31538	31538	-	0.0577689	0.973784	NA	-2.73133	0.20617	NA	-0.787461	0.679272	NA	2.19211	0.188022	NA	0.351664	0.837692	NA
chrI:31588-31608:-	chrI:31599:-	chrI	31588	31608	-	-1.94386	0.0212785	0.175053	-0.841409	0.302582	0.634029	-1.00648	0.206883	0.632042	0.17171	0.8234	0.957249	0.112624	0.880475	0.969276
chrI:31907:-	chrI:31907:-	chrI	31907	31907	-	1.31945	0.281566	0.8027	1.66473	0.180232	0.492871	1.61739	0.185429	0.604794	1.08429	0.396081	NA	1.49442	0.217484	0.595067
chrI:32501:-	chrI:32501:-	chrI	32501	32501	-	-1.48304	0.372597	0.876295	-0.668219	0.684933	NA	-0.779659	0.625506	NA	-1.32034	0.45134	NA	0.93571	0.523712	0.867511
chrI:32549:-	chrI:32549:-	chrI	32549	32549	-	-2.95825	0.129704	0.567588	0.1491	0.920331	NA	-1.15113	0.468149	0.856724	-0.621411	0.693647	NA	1.74515	0.204847	0.575557
chrI:32708:-	chrI:32708:-	chrI	32708	32708	-	-0.547344	0.611722	0.96582	-0.166259	0.880092	0.962626	-1.08045	0.343527	0.77359	0.252054	0.813903	NA	0.0557786	0.957094	0.988799
chrI:32749-32754:-	chrI:32749:-	chrI	32749	32754	-	0.629948	0.517602	0.942798	0.915863	0.354576	0.67704	0.0332253	0.973702	0.995204	-0.733546	0.508569	NA	-1.03268	0.327069	0.733035
chrI:32951-32982:-	chrI:32968:-	chrI	32951	32982	-	0.167953	0.770362	0.987504	0.404106	0.494301	0.781945	0.470059	0.411646	0.82203	-0.337229	0.590083	0.874809	1.81028	0.000881223	0.00966284
chrI:34343-34358:-	chrI:34358:-	chrI	34343	34358	-	0.566393	0.32327	0.839541	0.745059	0.204893	0.525741	0.272895	0.641874	0.923453	-0.32594	0.607453	0.882439	1.5446	0.00537	0.0427122
chrI:35067-35083:-	chrI:35067:-	chrI	35067	35083	-	-0.619886	0.542303	0.952602	-0.435687	0.679683	0.880597	0.0642467	0.948343	0.989517	-0.271849	0.793787	NA	0.438349	0.649436	0.93316
chrI:36288:-	chrI:36288:-	chrI	36288	36288	-	1.08431	0.780309	NA	0.257968	0.947372	NA	-0.240846	0.950861	NA	0.225575	0.953973	NA	4.36799	0.232263	NA
chrI:36331-36384:-	chrI:36369:-	chrI	36331	36384	-	0.0160158	0.975024	0.997983	0.428759	0.410174	0.721562	0.197345	0.700001	0.938875	-0.40037	0.471011	0.817554	4.09718	3.47e-18	4.02e-16
chrI:37252:-	chrI:37252:-	chrI	37252	37252	-	1.65361	0.491919	NA	-1.1458	0.672983	NA	0.802753	0.749602	NA	0.364226	0.891017	NA	3.51333	0.130927	NA
chrI:37278:-	chrI:37278:-	chrI	37278	37278	-	-0.44563	0.898406	NA	0.257975	0.941081	NA	-0.24084	0.944988	NA	2.69387	0.419642	NA	4.33111	0.176827	NA
chrI:39037:-	chrI:39037:-	chrI	39037	39037	-	1.99923	0.444542	NA	4.33612	0.079975	NA	3.78896	0.12635	NA	0.225581	0.935945	NA	1.66182	0.528403	NA
chrI:42701:-	chrI:42701:-	chrI	42701	42701	-	0.58788	0.797302	NA	0.266324	0.914712	NA	2.37735	0.264807	NA	-1.18388	0.636619	NA	3.94075	0.0570426	NA
chrI:42737-42739:-	chrI:42737:-	chrI	42737	42739	-	0.19521	0.805835	0.987504	0.748076	0.350525	0.673393	-0.0258183	0.974762	0.995404	-1.18393	0.224446	0.637405	2.39504	0.00120443	0.012559
chrI:42902:-	chrI:42902:-	chrI	42902	42902	-	-0.699592	0.649363	0.971568	-1.29613	0.439073	NA	-3.28859	0.106124	NA	-2.76875	0.159147	NA	0.218093	0.883289	0.970015
chrI:42926:-	chrI:42926:-	chrI	42926	42926	-	-0.0178792	0.99111	0.999794	-2.20073	0.285553	NA	0.446869	0.778698	NA	-0.485088	0.776129	NA	0.942621	0.544834	0.880187
chrI:42951:-	chrI:42951:-	chrI	42951	42951	-	-1.3197	0.0817459	0.432281	-0.734115	0.337268	0.662166	-0.67447	0.359762	0.785564	-0.490898	0.512909	0.83978	-0.0789906	0.910847	0.977286
chrI:43066:-	chrI:43066:-	chrI	43066	43066	-	-1.51803	0.0658946	0.378445	-2.17478	0.021118	0.142434	-0.525562	0.506196	0.874342	-0.994728	0.233308	0.646919	-0.311291	0.68746	0.948208
chrI:43088-43129:-	chrI:43099:-	chrI	43088	43129	-	-0.959446	0.0273056	0.208847	-0.958608	0.0335461	0.194641	-1.02588	0.0197433	0.161838	-0.500119	0.254856	0.66743	-0.67783	0.11266	0.402195
chrI:43255-43272:-	chrI:43269:-	chrI	43255	43272	-	-1.66963	0.0113612	0.113921	-1.87055	0.00875538	0.0786869	-2.0758	0.00272872	0.0424384	-0.968059	0.141657	0.537429	-0.841864	0.178732	0.53196
chrI:43318-43330:-	chrI:43318:-	chrI	43318	43330	-	-0.590294	0.501269	0.936256	-1.10482	0.240476	0.569602	-0.876632	0.328699	0.761128	-2.51024	0.0221267	0.222172	-0.545801	0.530589	0.870672
chrI:43593-43630:-	chrI:43611:-	chrI	43593	43630	-	-0.547305	0.551997	0.955485	-0.491016	0.605202	0.845525	-0.948625	0.316689	0.752216	-0.173468	0.852509	0.966014	-0.730588	0.427127	0.803907
chrI:45663-45672:-	chrI:45672:-	chrI	45663	45672	-	-0.544428	0.512875	0.940507	-0.802453	0.362763	0.684262	-1.41454	0.111843	0.471992	1.53614	0.0542076	0.352038	0.189437	0.814193	0.949674
chrI:45699:-	chrI:45699:-	chrI	45699	45699	-	0.300066	0.816131	0.987618	0.887746	0.494143	0.781886	-0.00393361	0.99764	0.999745	1.75445	0.160787	NA	0.525661	0.678133	0.943893
chrI:52233:-	chrI:52233:-	chrI	52233	52233	-	4.15453	0.0211905	0.174461	3.09162	0.0961648	0.352374	2.90661	0.114748	0.477643	3.05972	0.0997656	NA	2.18223	0.240457	0.627966
chrI:52283:-	chrI:52283:-	chrI	52283	52283	-	2.61298	0.0349392	0.248281	2.69752	0.0319025	0.188455	3.10904	0.0116528	0.114793	1.45363	0.272228	NA	1.10264	0.392389	0.782642
chrI:52601-52707:-	chrI:52617:-	chrI	52601	52707	-	0.13655	0.519095	0.943658	-0.143853	0.501692	0.786391	0.124969	0.555848	0.892117	0.323142	0.128913	0.515929	-0.203045	0.338324	0.743137
chrI:54766-54822:-	chrI:54790:-	chrI	54766	54822	-	0.0926596	0.771264	0.987504	-0.207754	0.528352	0.801764	-0.0809957	0.801352	0.966998	-0.540467	0.106254	0.474301	-0.488076	0.129718	0.439565
chrI:55232-55253:-	chrI:55241:-	chrI	55232	55253	-	2.22501	0.0135115	0.127914	1.1884	0.212145	0.534875	1.2188	0.190051	0.610557	1.18048	0.21488	0.62746	-1.40657	0.201343	0.570281
chrI:55313-55325:-	chrI:55325:-	chrI	55313	55325	-	5.40148	0.00461481	0.0608357	3.74874	0.0622047	NA	5.20186	0.00660028	0.0780137	2.80892	0.184357	NA	1.80007	0.400171	0.787467
chrI:55711-55721:-	chrI:55721:-	chrI	55711	55721	-	3.50502	0.00108728	0.0204938	1.58572	0.168385	0.476212	2.15762	0.0504076	0.297216	1.75842	0.122855	0.505399	-0.640037	0.616961	0.919903
chrI:55794:-	chrI:55794:-	chrI	55794	55794	-	4.27028	0.0924274	NA	3.6412	0.161621	NA	3.2049	0.217126	NA	0.225583	0.937608	NA	-0.639515	0.824383	NA
chrI:56148:-	chrI:56148:-	chrI	56148	56148	-	1.20399	0.567857	NA	0.189445	0.932251	NA	0.543991	0.800391	NA	-2.75789	0.271683	NA	-3.62299	0.148741	NA
chrI:56204:-	chrI:56204:-	chrI	56204	56204	-	1.55829	0.410631	NA	1.20709	0.53535	NA	0.312492	0.874518	NA	-0.419627	0.844714	NA	-3.5316	0.131307	NA
chrI:56857-56897:-	chrI:56882:-	chrI	56857	56897	-	-0.309257	0.24894	0.765929	-0.0506686	0.85183	0.95409	-0.435945	0.106867	0.460515	-0.0193779	0.942986	0.985295	-0.362303	0.175594	0.527104
chrI:57195:-	chrI:57195:-	chrI	57195	57195	-	0.968147	0.591385	0.963484	0.774476	0.681732	NA	0.660807	0.720331	NA	1.83643	0.305356	NA	0.852823	0.635348	NA
chrI:57329-57445:-	chrI:57374:-	chrI	57329	57445	-	-0.354841	0.09683	0.480349	0.0590268	0.783401	0.926563	-0.123735	0.562401	0.89408	0.375186	0.0790235	0.416399	-0.245297	0.249147	0.63822
chrI:57489:-	chrI:57489:-	chrI	57489	57489	-	-1.43873	0.52186	NA	-0.828466	0.714032	NA	0.257465	0.902499	NA	-0.631157	0.776995	NA	-4.17099	0.0926384	NA
chrI:57978-57980:-	chrI:57980:-	chrI	57978	57980	-	0.761995	0.531677	0.949011	1.48513	0.222521	0.547858	1.2554	0.298002	0.734453	-0.751271	0.599099	NA	0.874192	0.468531	0.833972
chrI:58027-58035:-	chrI:58035:-	chrI	58027	58035	-	-0.204091	0.868099	0.98946	0.214532	0.863379	0.957474	-0.198003	0.873212	0.978035	-0.379302	0.769313	NA	-0.313381	0.798007	0.948208
chrI:58057-58069:-	chrI:58069:-	chrI	58057	58069	-	-2.02359	0.145745	0.602378	-0.0172906	0.989153	0.996901	-0.460489	0.716546	0.942477	-0.524594	0.687808	NA	-0.702262	0.577367	0.897496
chrI:58136:-	chrI:58136:-	chrI	58136	58136	-	-2.13319	0.561731	NA	-2.9591	0.423594	NA	-3.45792	0.349742	NA	-2.99149	0.418538	NA	0.0432172	0.990036	NA
chrI:58201-58227:-	chrI:58204:-	chrI	58201	58227	-	-0.937176	0.0800841	0.42679	-0.593351	0.275939	0.607711	-0.568074	0.285486	0.722098	-0.528683	0.329673	0.731291	-0.269006	0.605424	0.913939
chrI:58252-58273:-	chrI:58257:-	chrI	58252	58273	-	-0.511	0.613517	0.966073	0.227157	0.822005	0.943149	0.211966	0.829641	0.972751	-2.43285	0.0767015	NA	0.630161	0.510774	0.859809
chrI:58326-58344:-	chrI:58326:-	chrI	58326	58344	-	0.475843	0.546763	0.953648	0.823816	0.306067	0.636754	1.42211	0.0637356	0.344975	0.467341	0.569853	0.86482	1.31363	0.0843311	0.334711
chrI:58379-58387:-	chrI:58387:-	chrI	58379	58387	-	-0.10733	0.906474	0.993278	-1.2828	0.218521	0.543192	-0.458834	0.6245	0.91838	-0.837799	0.399784	NA	-0.152039	0.867113	0.965952
chrI:58442-58519:-	chrI:58476:-	chrI	58442	58519	-	-0.290702	0.144786	0.600733	-0.119546	0.549333	0.814053	-0.268635	0.178006	0.59188	-0.143053	0.47372	0.81926	-0.464705	0.0197497	0.118995
chrI:61053-61093:-	chrI:61093:-	chrI	61053	61093	-	0.0383775	0.893073	0.991819	0.332923	0.247554	0.577296	-0.237348	0.410462	0.821155	-0.0613486	0.832951	0.959464	-0.159167	0.577275	0.897496
chrI:62535:-	chrI:62535:-	chrI	62535	62535	-	0.458871	0.823141	NA	-1.69787	0.484941	NA	0.641162	0.754912	NA	-3.14339	0.199494	NA	-4.00849	0.10182	NA
chrI:65513:-	chrI:65513:-	chrI	65513	65513	-	2.62534	0.229248	NA	1.91515	0.400579	NA	2.38321	0.279644	NA	-1.18201	0.645316	NA	1.93097	0.38181	NA
chrI:67811:-	chrI:67811:-	chrI	67811	67811	-	0.767486	0.467239	0.923177	0.0820275	0.942641	0.981873	0.591847	0.580812	0.902512	1.19776	0.261297	NA	1.06563	0.305571	0.709339
chrI:67833-67896:-	chrI:67841:-	chrI	67833	67896	-	0.433282	0.133976	0.575694	0.436491	0.133691	0.420898	0.0596995	0.837244	0.973752	-0.244627	0.405399	0.784279	-0.0692412	0.811215	0.94869
chrI:67923-67962:-	chrI:67941:-	chrI	67923	67962	-	0.901471	0.208469	0.712415	0.45655	0.567986	0.824682	1.1719	0.100517	0.445393	-0.217999	0.80278	0.951184	5.72583	5.26e-19	6.82e-17
chrI:68014-68091:-	chrI:68046:-	chrI	68014	68091	-	-0.544534	0.473017	0.924682	-0.703551	0.410781	0.722241	-0.0832431	0.91022	0.981781	-0.594608	0.475877	0.820829	4.70513	4.63e-14	3.22e-12
chrI:68285:-	chrI:68285:-	chrI	68285	68285	-	-0.94677	0.502222	0.936438	0.098028	0.943029	0.981949	-0.422871	0.758241	0.952743	-0.0706771	0.959355	NA	1.83496	0.138888	0.458984
chrI:69548-69648:-	chrI:69581:-	chrI	69548	69648	-	-0.396858	0.127967	0.563297	0.0378926	0.884703	0.963958	-0.51586	0.0484668	0.28992	0.530833	0.0414219	0.302466	-0.342971	0.187601	0.54631
chrI:71509-71519:-	chrI:71509:-	chrI	71509	71519	-	0.471548	0.61901	0.966091	-0.492575	0.639279	0.861673	-0.615844	0.545089	0.888173	1.11195	0.24183	NA	0.511101	0.587032	0.903423
chrI:72098-72099:-	chrI:72099:-	chrI	72098	72099	-	-1.11908	0.438328	0.913087	0.627778	0.640776	0.861889	0.58749	0.655936	0.928031	0.0480005	0.97245	NA	0.0235421	0.985854	0.995985
chrI:72913:-	chrI:72913:-	chrI	72913	72913	-	2.54966	0.306482	NA	4.2915	0.0760613	NA	3.78681	0.117492	NA	0.225576	0.934728	NA	2.94816	0.227934	NA
chrI:73571:-	chrI:73571:-	chrI	73571	73571	-	-0.445627	0.85788	0.98946	1.67692	0.497021	NA	2.78531	0.203894	NA	5.58109	0.00680281	NA	4.09908	0.0487208	0.229511
chrI:73661:-	chrI:73661:-	chrI	73661	73661	-	-2.09691	0.332075	0.845165	-2.81401	0.197319	NA	0.129862	0.942158	NA	1.94589	0.252454	NA	0.950184	0.577401	NA
chrI:75111-75130:-	chrI:75112:-	chrI	75111	75130	-	1.56554	0.241137	0.757376	1.50151	0.273697	0.605931	2.25576	0.0875852	0.413451	-3.10945	0.107192	NA	1.47885	0.266923	0.661956
chrI:75384:-	chrI:75384:-	chrI	75384	75384	-	-0.689552	0.73119	NA	-3.97704	0.0972982	NA	-2.02847	0.34991	NA	-0.519702	0.799429	NA	-2.00255	0.342362	NA
chrI:75664:-	chrI:75664:-	chrI	75664	75664	-	0.517974	0.520874	0.944315	0.512227	0.542706	0.809924	1.00015	0.209453	0.635312	1.46138	0.0669431	0.389443	1.1654	0.136093	0.452939
chrI:75731:-	chrI:75731:-	chrI	75731	75731	-	0.929571	0.470343	0.924682	1.91658	0.132238	0.418651	1.51043	0.233883	0.666674	0.798936	0.552971	NA	0.163207	0.902076	0.974834
chrI:75823:-	chrI:75823:-	chrI	75823	75823	-	0.0491726	0.973209	0.997877	0.502335	0.735484	NA	0.28415	0.84584	NA	0.954047	0.509656	NA	0.0922391	0.949137	0.987363
chrI:75886:-	chrI:75886:-	chrI	75886	75886	-	1.33751	0.511877	NA	1.84905	0.366803	NA	0.21735	0.919056	NA	0.619624	0.772977	NA	-1.80407	0.455009	NA
chrI:76159-76224:-	chrI:76184:-	chrI	76159	76224	-	-0.0468611	0.801081	0.987504	-0.0881099	0.63795	0.860782	-0.0917657	0.622379	0.91743	0.543293	0.00351568	0.07592	0.184489	0.320037	0.725601
chrI:80575:-	chrI:80575:-	chrI	80575	80575	-	4.15824	0.06417	NA	2.70186	0.264115	NA	3.52261	0.123471	NA	2.87474	0.229392	NA	2.44335	0.296762	NA
chrI:80614:-	chrI:80614:-	chrI	80614	80614	-	3.89899	0.15255	NA	3.94488	0.152162	NA	1.20472	0.691583	NA	1.59404	0.59596	NA	-0.639517	0.833275	NA
chrI:80776-80784:-	chrI:80776:-	chrI	80776	80784	-	5.54405	0.00233275	0.0367574	4.49574	0.0166833	0.121404	5.20341	0.00451317	0.0600337	3.67038	0.0579624	NA	0.825111	0.715753	0.948208
chrI:81834-81840:-	chrI:81840:-	chrI	81834	81840	-	1.47358	0.163499	0.637868	2.12989	0.0442303	0.22764	-0.0777563	0.945235	0.989265	-0.491608	0.685716	NA	-2.65051	0.0667554	0.284236
chrI:81862:-	chrI:81862:-	chrI	81862	81862	-	3.45703	0.107882	0.513754	3.16211	0.147497	NA	-0.207138	0.935527	NA	2.55045	0.249831	NA	-2.04729	0.424147	0.802229
chrI:81894-81917:-	chrI:81894:-	chrI	81894	81917	-	0.774546	0.46424	0.922316	0.905967	0.399651	0.714522	-1.21502	0.302931	0.739823	0.408293	0.709562	NA	-3.20446	0.0264533	0.14826
chrI:81974-81997:-	chrI:81982:-	chrI	81974	81997	-	0.977804	0.0119424	0.117625	0.807399	0.0391965	0.212596	-0.109807	0.780144	0.960943	-0.0816317	0.836791	0.960318	-1.86032	4.35e-06	8.88e-05
chrI:82018:-	chrI:82018:-	chrI	82018	82018	-	0.725994	0.66372	0.974874	1.2641	0.451413	NA	-0.586179	0.744584	NA	0.420351	0.809069	NA	-1.68499	0.379006	0.77407
chrI:82562-82612:-	chrI:82585:-	chrI	82562	82612	-	0.243827	0.380412	0.881795	0.524079	0.0618819	0.277702	0.245357	0.379425	0.800018	0.193736	0.494056	0.829899	0.132403	0.633366	0.927642
chrI:82661:-	chrI:82661:-	chrI	82661	82661	-	1.18104	0.550608	NA	1.20297	0.553369	NA	0.344294	0.867686	NA	-0.698004	0.763171	NA	-0.639258	0.766118	NA
chrI:83436-83454:-	chrI:83436:-	chrI	83436	83454	-	1.50196	0.22752	0.740152	1.16505	0.367121	0.687902	1.90028	0.125017	0.498618	-1.15764	0.469409	NA	-0.261097	0.8445	0.959454
chrI:83817:-	chrI:83817:-	chrI	83817	83817	-	2.77533	0.181508	NA	2.83941	0.177918	NA	2.60156	0.213958	NA	-1.18462	0.633338	NA	0.93598	0.669268	NA
chrI:84225:-	chrI:84225:-	chrI	84225	84225	-	-2.23544	0.337794	NA	-1.42658	0.538002	NA	-4.47585	0.0786898	NA	-4.00943	0.115232	NA	-1.21315	0.581684	NA
chrI:84264-84292:-	chrI:84292:-	chrI	84264	84292	-	-0.883921	0.193908	0.690981	-0.424557	0.538773	0.807221	-1.05247	0.13088	0.509696	-0.00166544	0.998026	0.99926	-0.949844	0.159846	0.499559
chrI:84465-84528:-	chrI:84494:-	chrI	84465	84528	-	-0.371179	0.14762	0.606825	-0.618468	0.0183069	0.129044	-0.842651	0.00119275	0.0231575	-0.345832	0.183528	0.592349	-0.460182	0.0721673	0.300112
chrI:85355:-	chrI:85355:-	chrI	85355	85355	-	2.10056	0.263738	0.78252	1.14857	0.561641	NA	2.07775	0.270966	NA	0.0385118	0.985576	NA	-3.08297	0.186037	NA
chrI:85376-85427:-	chrI:85427:-	chrI	85376	85427	-	5.54546	3.72e-09	4.73e-07	5.19718	4.04e-08	4.45e-06	5.13712	5.21e-08	5.64e-06	1.40963	0.194011	0.60405	0.0980775	0.93124	0.982687
chrI:85862-85876:-	chrI:85870:-	chrI	85862	85876	-	5.42993	0.000568142	0.0122446	4.88555	0.00213405	0.0299057	4.452	0.00510085	0.0654763	1.1932	0.522869	0.843323	0.951757	0.590656	0.905929
chrI:87057-87078:-	chrI:87078:-	chrI	87057	87078	-	0.121409	0.753425	0.986786	0.14345	0.716855	0.89735	-0.0626935	0.872642	0.977798	-0.262941	0.513901	0.840297	-0.737386	0.0621583	0.271401
chrI:88455:-	chrI:88455:-	chrI	88455	88455	-	-0.518609	0.732504	0.986007	0.714927	0.629068	NA	-0.248598	0.869383	NA	-0.356225	0.820274	NA	-0.0316632	0.982837	0.995403
chrI:89038:-	chrI:89038:-	chrI	89038	89038	-	2.01675	0.35824	NA	3.00471	0.168156	NA	2.03471	0.356433	NA	2.00099	0.373098	NA	1.04665	0.642401	NA
chrI:89491:-	chrI:89491:-	chrI	89491	89491	-	0.865392	0.629721	NA	0.73731	0.690688	NA	0.70991	0.695855	NA	-1.46461	0.504967	NA	-0.265267	0.886774	NA
chrI:89896:-	chrI:89896:-	chrI	89896	89896	-	0.0247752	0.984404	0.999097	1.20141	0.33335	0.658753	0.0438073	0.972689	0.995204	0.177187	0.89213	NA	0.1885	0.879909	0.969124
chrI:90435:-	chrI:90435:-	chrI	90435	90435	-	0.765134	0.173517	0.657366	1.21292	0.0325532	0.190986	0.574558	0.313951	0.749294	0.346098	0.559001	0.859819	-0.110503	0.848494	0.96124
chrI:91771:-	chrI:91771:-	chrI	91771	91771	-	1.11469	0.541039	NA	0.267149	0.890896	NA	0.799801	0.665838	NA	-1.246	0.572481	NA	0.308158	0.868328	NA
chrI:92261:-	chrI:92261:-	chrI	92261	92261	-	0.342231	0.867842	NA	-3.02758	0.215458	NA	-0.49696	0.816481	NA	-0.607326	0.78452	NA	-0.943529	0.660421	NA
chrI:92287-92307:-	chrI:92299:-	chrI	92287	92307	-	0.179501	0.767773	0.987438	-0.180868	0.77633	0.924689	-0.394825	0.528752	0.882561	0.227527	0.71485	0.920596	-0.572994	0.355885	0.758229
chrI:92403:-	chrI:92403:-	chrI	92403	92403	-	1.58223	0.359718	NA	-1.62533	0.459505	NA	0.223898	0.901294	NA	-1.69055	0.436411	NA	-0.955431	0.612564	NA
chrI:92444-92547:-	chrI:92522:-	chrI	92444	92547	-	0.346876	0.189272	0.683052	0.00121871	0.996352	0.998991	-0.0300294	0.909878	0.981781	-0.107973	0.68579	0.912363	-0.299854	0.257929	0.650289
chrI:93681:-	chrI:93681:-	chrI	93681	93681	-	3.45921	0.359648	NA	3.63312	0.338844	NA	-0.240855	0.951929	NA	0.225567	0.954977	NA	-0.639528	0.872825	NA
chrI:94447-94476:-	chrI:94462:-	chrI	94447	94476	-	1.00608	0.409619	0.898704	0.623995	0.633769	0.858886	1.30779	0.281606	0.718007	-3.12745	0.088324	NA	3.97502	0.00051174	0.00605711
chrI:95629:-	chrI:95629:-	chrI	95629	95629	-	1.07331	0.617323	0.966091	3.60007	0.075668	NA	2.30242	0.264301	NA	0.132372	0.95609	NA	1.97112	0.338458	NA
chrI:95664:-	chrI:95664:-	chrI	95664	95664	-	1.55273	0.248782	0.765821	2.00744	0.13955	0.430626	2.2055	0.0968757	0.436662	0.501594	0.736281	NA	1.81664	0.171475	0.520053
chrI:95710:-	chrI:95710:-	chrI	95710	95710	-	3.38261	0.109178	NA	1.29242	0.576288	NA	2.37999	0.26997	NA	0.200904	0.935612	NA	-0.641811	0.797503	NA
chrI:95830-95848:-	chrI:95844:-	chrI	95830	95848	-	6.87892	2.44e-05	0.000971263	6.11	0.000211384	0.00554479	6.37109	9.93e-05	0.00332067	4.24778	0.0136808	0.167625	-0.639521	0.768067	0.948208
chrI:95872-95883:-	chrI:95883:-	chrI	95872	95883	-	5.36277	0.00135549	0.024047	4.15536	0.0147406	0.111836	4.44753	0.0083643	0.09138	1.92235	0.296921	NA	1.39515	0.440199	0.812608
chrI:95904-95920:-	chrI:95904:-	chrI	95904	95920	-	6.1139	6.32e-08	6.09e-06	4.72992	3.66e-05	0.0013978	5.35059	2.42e-06	0.000162383	2.74416	0.0224729	0.223957	-0.66311	0.662422	0.938675
chrI:96476:-	chrI:96476:-	chrI	96476	96476	-	-0.146128	0.892538	0.991813	1.03588	0.327807	0.653612	0.393035	0.711997	0.941495	-0.261384	0.818524	NA	-0.815343	0.463814	0.829946
chrI:96586:-	chrI:96586:-	chrI	96586	96586	-	-1.16433	0.39805	0.892704	-3.51233	0.0650656	NA	-2.40189	0.115968	NA	-1.0054	0.478202	NA	-1.30726	0.341674	0.746781
chrI:96635:-	chrI:96635:-	chrI	96635	96635	-	4.63367	0.0653501	NA	3.1682	0.228072	NA	3.19882	0.215688	NA	0.225578	0.937346	NA	0.758698	0.789913	NA
chrI:97224-97249:-	chrI:97249:-	chrI	97224	97249	-	6.14941	9.21e-05	0.00289973	4.46048	0.00535813	0.0558219	5.13268	0.00117471	0.022888	0.208446	0.919973	0.979426	-2.06578	0.331885	0.738251
chrI:97587:-	chrI:97587:-	chrI	97587	97587	-	0.592327	0.806735	NA	3.30085	0.143125	NA	0.795899	0.742369	NA	1.06031	0.665683	NA	0.268645	0.912383	NA
chrI:98219:-	chrI:98219:-	chrI	98219	98219	-	1.19269	0.604791	NA	0.861468	0.718148	NA	0.893004	0.702426	NA	-0.709079	0.786115	NA	-0.0816267	0.97278	NA
chrI:98609:-	chrI:98609:-	chrI	98609	98609	-	4.67133	0.123934	NA	1.66337	0.616813	NA	1.20532	0.717871	NA	0.225584	0.946106	NA	-0.639512	0.848031	NA
chrI:99758-99811:-	chrI:99783:-	chrI	99758	99811	-	0.279915	0.364144	0.869651	0.0701637	0.822459	0.943349	-0.173153	0.577931	0.901199	-0.738721	0.0206766	0.214941	-0.618926	0.0469467	0.223232
chrI:100146:-	chrI:100146:-	chrI	100146	100146	-	0.113941	0.951295	0.995988	2.63781	0.126092	NA	0.758246	0.676099	NA	-0.825378	0.701693	NA	1.37135	0.431014	0.806471
chrI:100335-100341:-	chrI:100335:-	chrI	100335	100341	-	1.42134	0.0327718	0.237674	2.55222	0.000105946	0.00322983	2.12513	0.00122322	0.0235944	1.43629	0.0353465	0.283236	1.81185	0.00576143	0.0452165
chrI:100409:-	chrI:100409:-	chrI	100409	100409	-	-0.403856	0.853538	NA	0.761288	0.722104	NA	0.89793	0.668157	NA	-0.204622	0.927661	NA	-0.540462	0.804326	NA
chrI:100431-100433:-	chrI:100433:-	chrI	100431	100433	-	-1.92322	0.170084	0.650646	0.846065	0.483932	0.775766	0.217576	0.857834	0.975881	-1.7929	0.232922	NA	0.682749	0.563635	0.889676
chrI:100494-100500:-	chrI:100494:-	chrI	100494	100500	-	0.558754	0.742374	0.986353	1.52602	0.362025	NA	-0.24036	0.896467	NA	2.68749	0.093122	NA	2.399	0.128978	0.437617
chrI:100550-100560:-	chrI:100553:-	chrI	100550	100560	-	0.770033	0.635355	0.969021	2.06235	0.195144	NA	-0.208074	0.90478	NA	-1.37361	0.502653	NA	1.26607	0.425232	0.803186
chrI:100602:-	chrI:100602:-	chrI	100602	100602	-	0.215736	0.911148	0.993278	0.502027	0.798002	NA	-2.24606	0.337477	NA	0.488719	0.803242	NA	0.123106	0.949085	NA
chrI:100686:-	chrI:100686:-	chrI	100686	100686	-	-2.48135	0.307238	NA	-3.1928	0.192126	NA	-2.24672	0.358426	NA	-0.772044	0.728623	NA	0.647637	0.749816	NA
chrI:100758-100763:-	chrI:100763:-	chrI	100758	100763	-	0.825135	0.147673	0.606826	1.79534	0.00148606	0.0231169	0.689676	0.232361	0.664596	1.42423	0.0127434	0.161118	0.718245	0.206309	0.577625
chrI:100883:-	chrI:100883:-	chrI	100883	100883	-	0.506523	0.83001	NA	0.246529	0.922782	NA	2.51513	0.252138	NA	1.1819	0.616408	NA	2.22776	0.309424	NA
chrI:100985:-	chrI:100985:-	chrI	100985	100985	-	0.173936	0.791496	0.987504	1.55218	0.0153594	0.114861	0.868946	0.177474	0.591318	0.650848	0.327721	0.730043	1.10275	0.0812298	0.326424
chrI:101145-101225:-	chrI:101168:-	chrI	101145	101225	-	0.0291879	0.905087	0.993278	0.432286	0.0776506	0.314123	0.119839	0.624541	0.91838	0.529271	0.0306975	0.263231	0.290187	0.235389	0.620152
chrI:101248:-	chrI:101248:-	chrI	101248	101248	-	0.917142	0.618983	0.966091	2.02392	0.264911	NA	1.17821	0.521853	NA	1.93067	0.288866	NA	0.820265	0.655201	0.935829
chrI:101753:-	chrI:101753:-	chrI	101753	101753	-	1.37604	0.181366	0.669979	0.475556	0.662802	0.872503	0.865025	0.409594	0.820898	-0.465506	0.6896	NA	-0.186533	0.862549	0.964539
chrI:102187:-	chrI:102187:-	chrI	102187	102187	-	4.37881	0.0873028	NA	3.40837	0.197581	NA	3.20185	0.222152	NA	0.225577	0.938107	NA	0.757981	0.792647	NA
chrI:102276:-	chrI:102276:-	chrI	102276	102276	-	1.10691	0.542686	NA	1.60634	0.380877	NA	1.5664	0.38476	NA	-0.828059	0.706129	NA	0.292902	0.875551	NA
chrI:102364:-	chrI:102364:-	chrI	102364	102364	-	4.32565	0.127258	NA	2.58502	0.388024	NA	2.78886	0.339643	NA	0.22558	0.9429	NA	-0.639518	0.839089	NA
chrI:102705:-	chrI:102705:-	chrI	102705	102705	-	5.20051	0.0141422	0.13184	4.67343	0.0301273	NA	4.0049	0.0640492	NA	0.225586	0.929277	NA	-0.639512	0.801343	0.948208
chrI:102825:-	chrI:102825:-	chrI	102825	102825	-	-0.516128	0.775447	0.987504	1.52769	0.365188	NA	1.12982	0.501561	NA	-1.34487	0.519752	NA	0.380074	0.823393	0.952726
chrI:102855-102920:-	chrI:102905:-	chrI	102855	102920	-	7.9337	3.1e-07	2.46e-05	6.69686	1.89e-05	0.000832313	7.61148	9.48e-07	7.33e-05	4.59125	0.0048644	0.092491	-0.639526	0.762223	0.948208
chrI:105292:-	chrI:105292:-	chrI	105292	105292	-	-2.47525	0.262132	NA	0.255498	0.889804	NA	0.0785476	0.965487	NA	0.639197	0.723939	NA	-0.485856	0.790616	NA
chrI:105956-106007:-	chrI:105966:-	chrI	105956	106007	-	0.516657	0.205694	0.708327	0.674749	0.103561	0.367444	0.49833	0.22475	0.655443	-0.0412205	0.923017	0.979889	0.0585972	0.886649	0.971263
chrI:106366-106384:-	chrI:106372:-	chrI	106366	106384	-	0.447403	0.646088	0.970718	1.17766	0.226295	0.552455	0.904216	0.34887	0.777978	-0.36817	0.73066	NA	0.328012	0.735688	0.948208
chrI:106825:-	chrI:106825:-	chrI	106825	106825	-	1.02331	0.623744	NA	-0.649601	0.789645	NA	1.6891	0.411971	NA	-0.716796	0.766399	NA	1.62958	0.425336	NA
chrI:107098:-	chrI:107098:-	chrI	107098	107098	-	0.377567	0.807159	0.987504	1.18035	0.443559	NA	-0.243951	0.880175	NA	1.17685	0.444693	NA	0.241899	0.875453	0.967756
chrI:107328:-	chrI:107328:-	chrI	107328	107328	-	1.25337	0.472606	0.924682	1.1641	0.519408	NA	0.662983	0.713679	NA	1.73345	0.324182	NA	0.683367	0.699554	0.948208
chrI:107561:-	chrI:107561:-	chrI	107561	107561	-	-0.0758766	0.943058	0.995529	1.78697	0.0761345	0.31126	0.692797	0.501372	0.872647	0.967151	0.35276	NA	0.435175	0.670998	0.941619
chrI:108253:-	chrI:108253:-	chrI	108253	108253	-	-0.527167	0.794507	NA	0.294187	0.883861	NA	-0.739482	0.720417	NA	-1.06725	0.625524	NA	-1.29157	0.535739	NA
chrI:108547:-	chrI:108547:-	chrI	108547	108547	-	-0.234574	0.863864	0.98946	0.792222	0.557016	NA	-0.713974	0.616176	NA	-1.71303	0.301951	NA	-1.13358	0.42692	0.803879
chrI:108586-108592:-	chrI:108586:-	chrI	108586	108592	-	0.371617	0.762636	0.987276	0.129302	0.920549	0.975319	0.365785	0.768309	0.956444	-0.490252	0.718808	NA	0.65553	0.587936	0.903709
chrI:108614-108718:-	chrI:108635:-	chrI	108614	108718	-	0.298277	0.110794	0.52178	0.346374	0.0648138	0.285434	0.105798	0.572242	0.898804	-0.227161	0.227629	0.641396	-0.436328	0.0199455	0.119865
chrI:109016:-	chrI:109016:-	chrI	109016	109016	-	0.824409	0.482767	0.928145	2.04365	0.0762271	0.31126	2.16918	0.0558064	0.31726	1.17181	0.326128	NA	0.877406	0.450726	0.820566
chrI:110400-110403:-	chrI:110403:-	chrI	110400	110403	-	0.469284	0.663621	0.974874	-0.187564	0.87314	0.960901	0.216168	0.844546	0.974226	0.23105	0.838577	NA	0.478727	0.654817	0.935616
chrI:110434-110489:-	chrI:110446:-	chrI	110434	110489	-	-0.232419	0.275981	0.796838	-0.168532	0.435631	0.741217	-0.158248	0.459213	0.853008	-0.332708	0.125346	0.510591	-0.309136	0.146637	0.473309
chrI:111059:-	chrI:111059:-	chrI	111059	111059	-	4.18817	0.107507	NA	3.16552	0.24131	NA	2.78487	0.300575	NA	2.91915	0.284148	NA	-0.639524	0.827603	NA
chrI:111446-111474:-	chrI:111446:-	chrI	111446	111474	-	6.1505	0.000887183	0.0175185	3.74578	0.0568844	0.265286	5.20187	0.00539379	0.0685003	1.62147	0.478334	NA	-0.639512	0.78406	0.948208
chrI:111510:-	chrI:111510:-	chrI	111510	111510	-	1.06876	0.458359	0.918922	1.01855	0.492481	NA	0.343734	0.8184	NA	-0.251118	0.876645	NA	-0.00126302	0.999325	0.999862
chrI:111878:-	chrI:111878:-	chrI	111878	111878	-	0.153423	0.927598	0.994512	2.12125	0.188729	NA	-0.946083	0.611496	NA	-0.0919462	0.959169	NA	-0.047298	0.977664	0.993414
chrI:113371-113432:-	chrI:113420:-	chrI	113371	113432	-	0.0715802	0.76996	0.987504	0.165237	0.505853	0.78904	-0.116329	0.637499	0.921892	-0.106237	0.671357	0.908394	-0.134345	0.583259	0.900864
chrI:113716:-	chrI:113716:-	chrI	113716	113716	-	0.297202	0.882543	NA	-1.62572	0.49429	NA	0.15027	0.941095	NA	-3.14431	0.19167	NA	-0.474524	0.817095	NA
chrI:113740-113741:-	chrI:113740:-	chrI	113740	113741	-	-0.668215	0.481194	0.927652	0.400222	0.666731	0.87467	-0.0565328	0.951384	0.990241	-0.19485	0.839438	NA	0.444299	0.620131	0.920797
chrI:114571-114632:-	chrI:114619:-	chrI	114571	114632	-	-0.421097	0.133634	0.575548	-0.276097	0.330238	0.655834	-0.462965	0.100445	0.445221	0.861179	0.00200547	0.0510701	0.34396	0.215712	0.591895
chrI:114656-114667:-	chrI:114667:-	chrI	114656	114667	-	0.50263	0.390621	0.888051	0.212724	0.729534	0.902888	0.143272	0.811258	0.968592	0.848101	0.15312	0.555417	0.490296	0.399488	0.787139
chrI:118757:-	chrI:118757:-	chrI	118757	118757	-	-0.445623	0.88481	NA	1.66612	0.586297	NA	-0.240833	0.937592	NA	4.83835	0.0795876	NA	1.81081	0.532613	NA
chrI:120139:-	chrI:120139:-	chrI	120139	120139	-	-1.07187	0.529427	0.948043	0.276938	0.865172	NA	-0.894604	0.600459	NA	0.174777	0.915061	NA	0.559757	0.718859	0.948208
chrI:127029-127038:-	chrI:127029:-	chrI	127029	127038	-	3.60602	0.0566753	0.343438	2.33443	0.240482	NA	3.59602	0.0580634	NA	2.15493	0.281945	NA	0.291436	0.891467	0.972265
chrI:127163-127171:-	chrI:127163:-	chrI	127163	127171	-	1.41471	0.357025	0.863794	1.56818	0.316438	NA	1.66665	0.277185	0.715054	1.02889	0.521305	NA	0.16652	0.917285	0.978276
chrI:127193-127207:-	chrI:127207:-	chrI	127193	127207	-	1.50275	0.110719	0.521705	1.17005	0.230565	0.557598	0.94779	0.325732	0.758808	-0.379899	0.727217	NA	-0.0548796	0.955899	0.988604
chrI:127237-127245:-	chrI:127237:-	chrI	127237	127245	-	3.06294	0.0917248	0.464962	3.88709	0.0319686	0.188629	2.73576	0.136661	0.520276	2.20665	0.247348	NA	2.60126	0.154412	0.488758
chrI:127295-127298:-	chrI:127298:-	chrI	127295	127298	-	1.90813	0.150825	0.612359	2.37957	0.0751041	0.309108	1.60539	0.234041	0.666755	1.4636	0.291028	NA	1.37019	0.307201	0.711392
chrI:127404:-	chrI:127404:-	chrI	127404	127404	-	-0.518223	0.558496	0.957731	-0.399717	0.661714	0.87193	-1.10941	0.230995	0.6631	-1.06675	0.265528	NA	-0.651473	0.460941	0.82801
chrI:127571-127575:-	chrI:127575:-	chrI	127571	127575	-	-1.26197	0.0975305	0.481974	-1.02525	0.194488	0.51249	-0.575842	0.436183	0.838248	-1.27505	0.113948	0.490859	-0.441034	0.541398	0.877548
chrI:127709:-	chrI:127709:-	chrI	127709	127709	-	-1.81098	0.266466	0.785452	-0.713304	0.651071	NA	-0.583218	0.700355	NA	-0.409511	0.790625	NA	-0.641163	0.667329	0.940385
chrI:127731:-	chrI:127731:-	chrI	127731	127731	-	-1.07724	0.588002	NA	1.38382	0.440767	NA	-1.87386	0.401556	NA	-0.0351338	0.98547	NA	0.571328	0.749651	NA
chrI:127757:-	chrI:127757:-	chrI	127757	127757	-	-0.19997	0.866018	0.98946	-2.25588	0.133283	0.420033	-0.808197	0.511636	0.875959	-0.972582	0.45047	NA	-1.23764	0.315954	0.721217
chrI:127927-127931:-	chrI:127927:-	chrI	127927	127931	-	-0.448893	0.684501	0.979465	0.013133	0.990636	0.997034	-1.0231	0.377497	0.798497	-1.153	0.34581	NA	-0.228383	0.833319	0.956036
chrI:128075-128117:-	chrI:128102:-	chrI	128075	128117	-	0.096525	0.693775	0.981824	-0.191019	0.449541	0.751965	-0.436128	0.0812777	0.396962	-0.432602	0.0899262	0.441213	-0.639545	0.0101153	0.0703023
chrI:129019-129117:-	chrI:129072:-	chrI	129019	129117	-	-0.0746579	0.724448	0.985238	0.166342	0.434588	0.740204	-0.0812066	0.701987	0.938875	0.114167	0.592004	0.875333	-0.164088	0.438055	0.811495
chrI:132002:-	chrI:132002:-	chrI	132002	132002	-	3.45696	0.107254	NA	1.38088	0.553935	NA	2.60222	0.233006	NA	0.337352	0.892677	NA	-0.554938	0.825756	NA
chrI:134625-134637:-	chrI:134625:-	chrI	134625	134637	-	4.30745	0.0159086	0.142808	3.66665	0.043839	0.2265	3.19712	0.0786262	0.388424	0.157969	0.943567	NA	-2.10421	0.355989	0.758243
chrI:134660-134696:-	chrI:134696:-	chrI	134660	134696	-	4.26024	4.05e-07	3.13e-05	3.69726	1.51e-05	0.000689316	3.40731	6.27e-05	0.00233428	0.442595	0.666289	0.906712	-0.620964	0.555605	0.885865
chrI:135672-135723:-	chrI:135706:-	chrI	135672	135723	-	-0.14283	0.566304	0.95948	-0.154226	0.541315	0.808701	-0.36572	0.144898	0.534604	-0.130384	0.605312	0.8817	-0.306814	0.217819	0.595575
chrI:136640:-	chrI:136640:-	chrI	136640	136640	-	-1.42629	0.351502	0.859831	-1.33369	0.417161	NA	-2.82947	0.143255	NA	-1.37396	0.403238	NA	1.84806	0.159233	0.498377
chrI:136671-136711:-	chrI:136707:-	chrI	136671	136711	-	-0.701975	0.323438	0.839541	0.191375	0.784979	0.927493	-0.66423	0.356388	0.782726	-0.841241	0.272167	0.686392	2.16896	0.000699145	0.00791569
chrI:137317:-	chrI:137317:-	chrI	137317	137317	-	-1.83862	0.588816	NA	0.385165	0.909205	NA	-1.63383	0.630983	NA	-1.16741	0.731436	NA	3.11006	0.316747	NA
chrI:137485:-	chrI:137485:-	chrI	137485	137485	-	-1.9677	0.509274	NA	1.0679	0.704599	NA	-0.321842	0.914018	NA	0.281553	0.923374	NA	2.81011	0.287844	NA
chrI:137573:-	chrI:137573:-	chrI	137573	137573	-	3.51536	0.0791395	0.423547	3.70244	0.0696619	NA	3.52477	0.0802744	NA	2.50997	0.251926	NA	5.62495	0.00353816	0.0306163
chrI:137783:-	chrI:137783:-	chrI	137783	137783	-	-0.734181	0.736727	NA	0.482555	0.821157	NA	-2.07965	0.401012	NA	-0.604504	0.788917	NA	-2.52267	0.303527	NA
chrI:137855:-	chrI:137855:-	chrI	137855	137855	-	-0.400293	0.773438	0.987504	0.334256	0.809726	NA	-0.409395	0.771136	NA	-1.53436	0.348061	NA	-0.127911	0.925104	0.98045
chrI:138345:-	chrI:138345:-	chrI	138345	138345	-	1.45608	0.506987	NA	0.0214469	0.992819	NA	0.616886	0.784389	NA	0.100967	0.965973	NA	-0.0248011	0.991308	NA
chrI:138367-138478:-	chrI:138414:-	chrI	138367	138478	-	-0.177948	0.481406	0.927652	0.36416	0.15011	0.448309	0.200878	0.42623	0.831353	0.0310606	0.902572	0.978188	-0.325095	0.198256	0.565532
chrI:138978:-	chrI:138978:-	chrI	138978	138978	-	-1.80425	0.246944	0.764111	-1.57976	0.329084	NA	-2.69085	0.118966	NA	-0.361418	0.808771	NA	-1.79549	0.243059	0.630715
chrI:139046:-	chrI:139046:-	chrI	139046	139046	-	0.563991	0.734737	0.986114	-1.64855	0.434398	NA	-2.17709	0.30881	NA	1.38458	0.403552	NA	0.605526	0.714048	0.948208
chrI:139523-139564:-	chrI:139541:-	chrI	139523	139564	-	-0.33341	0.615717	0.966091	-0.0251165	0.970342	0.990453	0.236065	0.718976	0.943142	-0.906708	0.20302	0.613797	-0.776242	0.247446	0.636213
chrI:139601-139628:-	chrI:139615:-	chrI	139601	139628	-	0.275563	0.571995	0.96064	0.877863	0.0725593	0.303134	0.267583	0.585246	0.904108	-0.39611	0.440983	0.804026	-0.571091	0.251091	0.640523
chrI:139653-139805:-	chrI:139789:-	chrI	139653	139805	-	0.210091	0.616084	0.966091	0.906921	0.0304478	0.182708	0.108859	0.796059	0.96566	0.0585075	0.890898	0.975261	-0.647957	0.127002	0.433078
chrI:140150-140170:-	chrI:140170:-	chrI	140150	140170	-	1.1103	0.186359	0.6799	-0.0628555	0.945463	0.983442	0.738487	0.387807	0.807092	-0.182558	0.843641	0.961784	-0.00513984	0.995273	0.998535
chrI:140192-140214:-	chrI:140200:-	chrI	140192	140214	-	-0.371106	0.523331	0.945465	0.528071	0.360313	0.681883	-0.341145	0.560205	0.893821	-0.595451	0.328731	0.730259	-1.00159	0.0913112	0.353012
chrI:140465-140467:-	chrI:140465:-	chrI	140465	140467	-	0.0250876	0.986146	0.999535	-0.850786	0.584584	NA	-2.40102	0.162817	NA	-2.88432	0.134868	NA	-1.38239	0.363091	0.762868
chrI:140648-140680:-	chrI:140648:-	chrI	140648	140680	-	1.22975	0.237954	0.753258	0.851156	0.430212	0.736985	-0.00288027	0.997907	0.999745	-0.468449	0.68984	NA	-1.2716	0.275981	0.673107
chrI:141253:-	chrI:141253:-	chrI	141253	141253	-	0.4245	0.805288	NA	0.277984	0.875734	NA	0.105336	0.952065	NA	-1.93933	0.361405	NA	-1.75609	0.360126	NA
chrI:141286-141331:-	chrI:141294:-	chrI	141286	141331	-	1.46115	0.105325	0.50599	1.89162	0.0374357	0.207587	1.04771	0.254474	0.690434	0.319116	0.745021	0.931253	-0.661919	0.503654	0.856398
chrI:141427-141678:-	chrI:141488:-	chrI	141427	141678	-	0.0963477	0.647055	0.970718	0.162428	0.440683	0.745946	-0.168092	0.42475	0.830598	-0.0659391	0.754397	0.934686	-0.773127	0.000242894	0.00316516
chrI:141707-141711:-	chrI:141707:-	chrI	141707	141711	-	0.937674	0.191265	0.686195	1.94101	0.00635372	0.0632451	0.597154	0.414928	0.823829	0.74071	0.320002	0.722867	-0.223815	0.764968	0.948208
chrI:141932:-	chrI:141932:-	chrI	141932	141932	-	-0.890038	0.596535	0.964007	0.880275	0.574478	NA	-1.24405	0.484071	NA	0.122513	0.94035	NA	0.517403	0.735959	NA
chrI:142080:-	chrI:142080:-	chrI	142080	142080	-	0.73569	0.683543	NA	0.267086	0.888843	NA	-0.785758	0.69377	NA	-0.50286	0.804394	NA	0.891271	0.617799	NA
chrI:146140:-	chrI:146140:-	chrI	146140	146140	-	5.17356	0.0220453	NA	3.76324	0.108247	NA	3.52024	0.130071	NA	0.225587	0.932395	NA	-0.639512	0.809952	NA
chrI:146176-146222:-	chrI:146198:-	chrI	146176	146222	-	8.16904	9.4e-08	8.49e-06	7.21813	2.79e-06	0.000173045	7.95735	2.05e-07	1.92e-05	3.88676	0.0194661	0.207553	1.76586	0.337183	0.741883
chrI:147161-147165:-	chrI:147161:-	chrI	147161	147165	-	2.13396	0.23954	0.755426	1.88636	0.321541	0.648527	3.7833	0.030774	0.216639	2.45692	0.181993	NA	4.3984	0.0111428	0.0758163
chrI:147199:-	chrI:147199:-	chrI	147199	147199	-	0.970756	0.715113	NA	2.70226	0.274691	NA	2.78855	0.245782	NA	2.46285	0.325839	NA	4.68312	0.0404308	NA
chrI:148076:-	chrI:148076:-	chrI	148076	148076	-	-2.7776	0.166955	0.64466	0.291393	0.853153	NA	-0.0128166	0.993436	NA	-0.475492	0.774062	NA	0.459089	0.76066	0.948208
chrI:148317:-	chrI:148317:-	chrI	148317	148317	-	4.32536	0.0952737	NA	2.59343	0.348035	NA	2.78874	0.298912	NA	2.91865	0.283336	NA	-0.639522	0.82733	NA
chrI:148682:-	chrI:148682:-	chrI	148682	148682	-	4.26961	0.113275	NA	0.257975	0.931975	NA	4.00824	0.139284	NA	0.225583	0.9405	NA	0.888444	0.766148	NA
chrI:148705:-	chrI:148705:-	chrI	148705	148705	-	1.7287	0.494067	NA	-2.33888	0.415855	NA	-1.39206	0.628042	NA	-1.00346	0.723955	NA	-1.70532	0.547838	NA
chrI:149084-149102:-	chrI:149098:-	chrI	149084	149102	-	4.34291	0.0130519	0.124983	3.83025	0.0312484	0.18575	4.03189	0.0218825	0.174282	1.11722	0.581635	NA	-2.05907	0.360252	0.760902
chrI:149145-149156:-	chrI:149145:-	chrI	149145	149156	-	6.51507	0.000122099	0.00360511	5.51185	0.00140528	0.0222985	5.28763	0.00208983	0.035214	4.02181	0.02539	NA	1.736	0.380222	0.774578
chrI:149405:-	chrI:149405:-	chrI	149405	149405	-	0.409827	0.70583	0.983902	1.60334	0.132452	0.418898	0.517645	0.634972	0.92077	-0.189771	0.872149	NA	0.491215	0.647368	0.932734
chrI:149552:-	chrI:149552:-	chrI	149552	149552	-	3.10076	0.140936	NA	1.76721	0.428051	NA	2.29983	0.284049	NA	1.37289	0.54624	NA	0.436646	0.848443	NA
chrI:149780:-	chrI:149780:-	chrI	149780	149780	-	3.44106	0.379418	NA	3.14256	0.427886	NA	1.20643	0.769921	NA	0.225554	0.956403	NA	-0.63954	0.876817	NA
chrI:151161-151241:-	chrI:151175:-	chrI	151161	151241	-	-0.0883942	0.784651	0.987504	-0.444893	0.181317	0.49458	-0.468788	0.15265	0.549579	-0.13137	0.689901	0.913089	-0.356238	0.271525	0.667514
chrI:151322:-	chrI:151322:-	chrI	151322	151322	-	1.51721	0.387788	0.886439	1.88269	0.288964	NA	0.980836	0.586556	NA	1.21106	0.507005	NA	1.76151	0.310892	0.715293
chrI:151964:-	chrI:151964:-	chrI	151964	151964	-	-0.44563	0.894893	NA	1.66305	0.620662	NA	-0.240839	0.943078	NA	1.58763	0.635092	NA	4.59564	0.134884	NA
chrI:151990-152018:-	chrI:151994:-	chrI	151990	152018	-	-0.534436	0.482184	0.928039	-0.864504	0.306245	0.636971	0.129364	0.860614	0.976492	-1.33269	0.137246	0.529066	2.92556	1.56e-05	0.0002847
chrI:152043-152063:-	chrI:152051:-	chrI	152043	152063	-	-0.61176	0.327407	0.841772	-0.661492	0.318687	0.646595	-0.199486	0.746341	0.949018	-1.31302	0.0645885	0.383237	2.03734	0.000370695	0.00458865
chrI:154182:-	chrI:154182:-	chrI	154182	154182	-	-1.09614	0.516616	0.942166	-0.671888	0.695236	NA	-0.698103	0.67684	NA	-2.87196	0.167691	NA	-0.787743	0.634191	0.927924
chrI:154212-154232:-	chrI:154232:-	chrI	154212	154232	-	0.471983	0.616411	0.966091	1.21061	0.198273	0.517359	1.14412	0.217762	0.64612	-0.288758	0.777701	0.943494	1.3525	0.139793	0.460826
chrI:154258:-	chrI:154258:-	chrI	154258	154258	-	-1.84322	0.352085	NA	-0.162466	0.930206	NA	-0.724207	0.697097	NA	-1.0549	0.590876	NA	-1.11278	0.549724	NA
chrI:154397:-	chrI:154397:-	chrI	154397	154397	-	3.44235	0.165081	NA	4.5725	0.0630569	NA	3.20184	0.20158	NA	1.77682	0.517546	NA	2.55516	0.312009	NA
chrI:154418:-	chrI:154418:-	chrI	154418	154418	-	-2.18895	0.325729	NA	0.840681	0.648068	NA	0.362479	0.843814	NA	0.0267344	0.98891	NA	-0.35254	0.850307	NA
chrI:154456:-	chrI:154456:-	chrI	154456	154456	-	-0.607125	0.651112	0.972093	-0.404094	0.770542	0.921926	-0.288464	0.828842	0.972751	0.744966	0.567599	NA	-0.318694	0.808162	0.9484
chrI:154498:-	chrI:154498:-	chrI	154498	154498	-	0.964743	0.752967	NA	3.4144	0.228357	NA	3.51982	0.207988	NA	1.59312	0.601153	NA	1.81082	0.533031	NA
chrI:154661-154674:-	chrI:154669:-	chrI	154661	154674	-	-0.324007	0.619478	0.966091	-0.215655	0.747645	0.911106	-0.662219	0.321724	0.754715	-0.434405	0.521626	0.842886	0.190287	0.765762	0.948208
chrI:154724-154808:-	chrI:154740:-	chrI	154724	154808	-	-0.226214	0.218544	0.727979	-0.102293	0.578831	0.830936	-0.154432	0.401123	0.815183	0.0212129	0.908304	0.979426	-0.380688	0.0383759	0.194052
chrI:156894:-	chrI:156894:-	chrI	156894	156894	-	-2.83793	0.237723	NA	0.0174873	0.993241	NA	-1.60556	0.464718	NA	-2.0382	0.38733	NA	-2.00008	0.362427	NA
chrI:157326-157362:-	chrI:157326:-	chrI	157326	157362	-	5.92756	0.000620896	0.0131395	4.52304	0.011794	0.0965888	5.37244	0.00208558	0.0351646	4.39268	0.0147907	NA	2.8014	0.131596	0.443454
chrI:157710:-	chrI:157710:-	chrI	157710	157710	-	4.54161	0.0930144	NA	3.16205	0.260275	NA	2.78483	0.319512	NA	0.22558	0.940756	NA	-0.639517	0.833124	NA
chrI:158637-158722:-	chrI:158689:-	chrI	158637	158722	-	-0.168342	0.425844	0.908041	-0.23362	0.27187	0.603337	-0.238129	0.260773	0.697864	0.431324	0.0414422	0.302478	-0.361099	0.0876245	0.343028
chrI:160157:-	chrI:160157:-	chrI	160157	160157	-	0.968877	0.72603	NA	0.257975	0.926076	NA	2.20665	0.39346	NA	4.76485	0.0497692	NA	3.86446	0.111646	NA
chrI:161345-161346:-	chrI:161345:-	chrI	161345	161346	-	-0.0697692	0.953702	0.996166	-2.02283	0.156436	0.458583	-0.174819	0.885372	0.979732	-0.258046	0.835165	NA	-0.292163	0.80809	0.9484
chrI:167076:-	chrI:167076:-	chrI	167076	167076	-	2.7189	0.171274	0.652731	1.28705	0.554931	NA	-1.65371	0.492035	NA	1.77867	0.398495	NA	3.8834	0.0465021	0.221713
chrI:167105-167133:-	chrI:167133:-	chrI	167105	167133	-	7.26065	9.53e-06	0.000454369	6.38948	0.000114332	0.00344642	5.78682	0.000482238	0.0115292	4.68749	0.00607779	0.105167	-0.639523	0.769032	0.948208
chrI:167219:-	chrI:167219:-	chrI	167219	167219	-	4.42554	0.0693519	NA	4.00197	0.107087	NA	2.78866	0.271698	NA	0.225586	0.935726	NA	-0.639512	0.81917	NA
chrI:167265:-	chrI:167265:-	chrI	167265	167265	-	-0.408651	0.862687	NA	0.485703	0.835125	NA	1.70084	0.436079	NA	1.76292	0.424479	NA	0.957393	0.663821	NA
chrI:167385:-	chrI:167385:-	chrI	167385	167385	-	4.49699	0.0379342	NA	4.37218	0.0468253	NA	3.52718	0.111974	NA	1.74287	0.487429	NA	1.80452	0.443703	NA
chrI:167426:-	chrI:167426:-	chrI	167426	167426	-	4.29798	0.0910481	NA	2.80914	0.295946	NA	3.52251	0.172692	NA	1.59785	0.57552	NA	-0.639519	0.824721	NA
chrI:167726:-	chrI:167726:-	chrI	167726	167726	-	0.385079	0.815396	0.987504	1.61171	0.316831	NA	0.285106	0.865157	NA	0.945326	0.569132	NA	1.00748	0.52723	0.869257
chrI:168282:-	chrI:168282:-	chrI	168282	168282	-	-0.588317	0.676091	0.977623	-0.446947	0.75902	NA	-0.400935	0.77601	NA	-1.89441	0.260659	NA	-0.770609	0.584054	0.901527
chrI:168762:-	chrI:168762:-	chrI	168762	168762	-	-1.94393	0.463895	NA	1.75374	0.461591	NA	2.02189	0.383363	NA	2.32105	0.319603	NA	1.22835	0.600912	NA
chrI:168877:-	chrI:168877:-	chrI	168877	168877	-	0.977862	0.597799	NA	-1.62062	0.477565	NA	-0.50273	0.799338	NA	0.262578	0.892689	NA	-0.264778	0.89003	NA
chrI:168911-168950:-	chrI:168942:-	chrI	168911	168950	-	0.298848	0.698533	0.98254	-1.22798	0.163951	0.469846	0.0677246	0.931053	0.985358	0.645362	0.408177	0.786724	0.00413302	0.99574	0.998778
chrI:168976-169061:-	chrI:169021:-	chrI	168976	169061	-	0.135384	0.576225	0.961889	-0.260741	0.28992	0.621743	-0.224133	0.358218	0.784502	0.454758	0.0616432	0.375466	0.118675	0.623606	0.922477
chrI:170532:-	chrI:170532:-	chrI	170532	170532	-	-1.09185	0.670399	NA	-1.52915	0.579248	NA	-3.43673	0.215353	NA	0.642258	0.794583	NA	-1.38552	0.591172	NA
chrI:170726-170749:-	chrI:170738:-	chrI	170726	170749	-	4.23382	2.25e-11	3.73e-09	3.16771	9.64e-07	6.97e-05	2.85535	9.33e-06	0.000503631	0.652236	0.370618	0.763292	-1.15224	0.154985	0.489789
chrI:170798-170809:-	chrI:170809:-	chrI	170798	170809	-	3.88181	0.0506283	0.318759	2.81038	0.169738	NA	3.03934	0.131046	NA	0.134224	0.955226	NA	-0.709557	0.768063	0.948208
chrI:171693-171768:-	chrI:171719:-	chrI	171693	171768	-	-0.109118	0.635151	0.969021	-0.128646	0.583093	0.832552	0.203988	0.373981	0.795691	0.875131	0.000130304	0.00751034	0.198186	0.384671	0.777197
chrI:172598-172620:-	chrI:172620:-	chrI	172598	172620	-	4.09097	0.0219059	0.178854	1.84225	0.344615	0.668264	3.24654	0.0731694	0.374157	3.82119	0.034651	NA	0.379705	0.851874	0.961973
chrI:174310:-	chrI:174310:-	chrI	174310	174310	-	4.84892	0.0324668	NA	3.64532	0.12138	NA	4.01012	0.0813298	NA	0.225586	0.932423	NA	-0.639512	0.810028	NA
chrI:175126-175189:-	chrI:175179:-	chrI	175126	175189	-	0.0524945	0.86889	0.98946	0.00532401	0.986859	0.995936	-0.561627	0.0828446	0.401204	-0.084588	0.794027	0.947962	-0.652019	0.0424471	0.208201
chrI:179686-179696:-	chrI:179696:-	chrI	179686	179696	-	0.450835	0.74191	0.986353	-0.271514	0.851686	NA	-1.25038	0.405104	0.818158	-0.0663037	0.963111	NA	-2.74273	0.103871	0.383084
chrI:179725:-	chrI:179725:-	chrI	179725	179725	-	-0.466286	0.802421	NA	-3.83452	0.0931767	NA	-1.88629	0.355793	NA	-0.156026	0.934226	NA	-0.551392	0.766562	NA
chrI:180018-180023:-	chrI:180023:-	chrI	180018	180023	-	-0.918938	0.251165	0.769036	-1.12103	0.184623	0.499634	-1.2714	0.123212	0.495479	-0.732211	0.373013	0.7657	-1.42587	0.0796374	0.321957
chrI:180051-180056:-	chrI:180056:-	chrI	180051	180056	-	0.0817747	0.889828	0.990962	-1.1379	0.0889612	0.338728	-0.67864	0.272331	0.710881	-0.67171	0.293372	0.701515	0.66839	0.247278	0.636066
chrI:180079-180108:-	chrI:180079:-	chrI	180079	180108	-	-0.00749177	0.989979	0.999794	-0.168482	0.786976	0.928704	-0.110252	0.855241	0.975417	-1.32804	0.0538449	0.350935	-0.23002	0.700163	0.948208
chrI:180285:-	chrI:180285:-	chrI	180285	180285	-	-0.14686	0.936244	NA	-1.25587	0.538173	NA	-0.34704	0.852247	NA	-1.39579	0.498329	NA	-2.06202	0.308226	NA
chrI:180818:-	chrI:180818:-	chrI	180818	180818	-	-4.25365	0.0839522	NA	-3.55004	0.149208	NA	-1.60137	0.474513	NA	-1.12823	0.614484	NA	0.330885	0.871506	NA
chrI:180996-181008:-	chrI:180996:-	chrI	180996	181008	-	-0.130875	0.826488	0.988315	-0.128455	0.835557	0.948089	-0.503307	0.412469	0.822563	-0.8592	0.187985	0.597432	-0.21322	0.719858	0.948208
chrI:182262:-	chrI:182262:-	chrI	182262	182262	-	-0.445632	0.904161	NA	0.257973	0.94443	NA	-0.240842	0.948115	NA	1.86794	0.609172	NA	4.53122	0.186679	NA
chrI:182404-182416:-	chrI:182416:-	chrI	182404	182416	-	0.585719	0.602567	0.964942	0.644805	0.575443	0.829073	1.02835	0.357432	0.783993	-0.232947	0.847129	NA	0.509552	0.64952	0.933192
chrI:182613-182616:-	chrI:182613:-	chrI	182613	182616	-	0.0131118	0.984085	0.999097	-0.177445	0.798771	0.934362	0.710364	0.269739	0.707909	-0.744259	0.308878	0.713942	2.61059	2.27e-05	0.000396975
chrI:183341-183361:-	chrI:183361:-	chrI	183341	183361	-	-1.05898	0.181825	0.67084	-0.913516	0.268529	0.59917	-0.27014	0.725474	0.944738	-0.651045	0.420146	0.793185	-0.651382	0.396971	0.786005
chrI:183545-183554:-	chrI:183545:-	chrI	183545	183554	-	-0.147503	0.790658	0.987504	-0.409612	0.490666	0.780082	-0.292014	0.60652	0.91258	0.188872	0.738992	0.928567	0.925631	0.0810753	0.326009
chrI:184571-184593:-	chrI:184571:-	chrI	184571	184593	-	-0.0571275	0.922862	0.994067	-0.383404	0.546066	0.811967	0.105651	0.858175	0.975955	-0.621298	0.3376	0.737551	2.06032	0.000193905	0.00260558
chrI:184659-184680:-	chrI:184673:-	chrI	184659	184680	-	0.101067	0.867145	0.98946	0.0538612	0.932573	0.978928	0.841002	0.153153	0.550336	0.446464	0.469083	0.817103	3.43069	7.69e-10	3.01e-08
chrI:188962-188983:-	chrI:188962:-	chrI	188962	188983	-	-0.49139	0.593001	0.963484	-1.06492	0.287515	0.619492	-0.612771	0.511933	0.876138	-1.70776	0.110021	NA	-0.258308	0.775075	0.948208
chrI:189049-189092:-	chrI:189077:-	chrI	189049	189092	-	-0.301824	0.500249	0.9359	-0.397295	0.391693	0.708609	0.0704804	0.874224	0.978346	-0.27921	0.544297	0.853563	-0.000542932	0.999018	0.999862
chrI:190047:-	chrI:190047:-	chrI	190047	190047	-	-0.969234	0.576191	0.961889	-2.18748	0.297852	NA	-1.13341	0.52391	NA	0.979544	0.550663	NA	0.267885	0.869756	0.966473
chrI:194500:-	chrI:194500:-	chrI	194500	194500	-	4.58869	0.0843265	NA	1.66713	0.575978	NA	2.20716	0.433179	NA	0.22558	0.939977	NA	1.81011	0.520474	NA
chrI:194700-194703:-	chrI:194703:-	chrI	194700	194703	-	3.94861	0.010142	0.105575	2.1033	0.193225	0.511086	2.42436	0.123678	0.496256	-2.13589	0.307878	NA	-3.00099	0.151948	0.483548
chrI:198045:-	chrI:198045:-	chrI	198045	198045	-	-1.40963	0.563914	NA	-0.703295	0.773257	NA	-2.6862	0.276745	NA	2.57759	0.209906	NA	-0.639083	0.776302	NA
chrI:198197-198234:-	chrI:198217:-	chrI	198197	198234	-	-0.37384	0.662053	0.974653	0.477957	0.57174	0.827298	-0.558241	0.528967	0.882561	3.1551	3.43e-05	0.00265494	-0.806331	0.355996	0.758243
chrI:198269:-	chrI:198269:-	chrI	198269	198269	-	0.509916	0.78177	0.987504	0.814955	0.665756	NA	-1.24072	0.576198	NA	3.09886	0.0733987	NA	-1.60192	0.462293	0.829039
chrI:198319-198329:-	chrI:198319:-	chrI	198319	198329	-	-1.62877	0.246401	0.763348	0.613077	0.621261	0.853436	-2.07121	0.176767	0.590479	1.49247	0.212698	NA	0.0672465	0.956078	0.988604
chrI:198738:-	chrI:198738:-	chrI	198738	198738	-	-2.5525	0.26128	NA	-0.271353	0.890437	NA	-3.76533	0.100343	NA	1.37748	0.454743	NA	-2.75947	0.222637	NA
chrI:198999-199014:-	chrI:198999:-	chrI	198999	199014	-	-1.58977	0.0176166	0.153354	-2.48982	0.00118305	0.0195295	-1.83441	0.00769502	0.0862909	0.188281	0.769278	0.940641	-2.24926	0.0011021	0.0116495
chrI:200339:-	chrI:200339:-	chrI	200339	200339	-	0.973199	0.702014	0.982744	1.73515	0.493542	NA	1.20356	0.638223	NA	1.60931	0.523198	NA	5.95432	0.00518273	0.0415649
chrI:200362-200455:-	chrI:200419:-	chrI	200362	200455	-	-1.91357	0.00737147	0.0847275	-1.59455	0.0362207	0.203875	-0.889757	0.165233	0.571852	0.283899	0.636559	0.895558	3.56732	2.48e-11	1.2e-09
chrI:200751:-	chrI:200751:-	chrI	200751	200751	-	-2.57359	0.351866	NA	0.571192	0.816169	NA	-1.34222	0.60375	NA	-3.31306	0.233244	NA	-4.17816	0.13276	NA
chrI:206797-206801:-	chrI:206797:-	chrI	206797	206801	-	4.01214	0.0235364	0.1887	4.24307	0.0172557	0.123835	3.54779	0.0471134	0.285433	0.234601	0.915239	NA	-2.10266	0.353059	0.755468
chrI:206998-207016:-	chrI:207016:-	chrI	206998	207016	-	6.09122	0.000320933	0.00788706	6.54146	0.000115343	0.00346633	5.28765	0.00199999	0.0342413	3.19889	0.088127	NA	-0.639517	0.772351	0.948208
chrI:207053:-	chrI:207053:-	chrI	207053	207053	-	4.18868	0.133081	NA	2.58662	0.379876	NA	3.51982	0.212332	NA	0.225578	0.942048	NA	-0.639519	0.836717	NA
chrI:207318:-	chrI:207318:-	chrI	207318	207318	-	2.59601	0.245969	NA	2.54609	0.2635	NA	2.38252	0.291093	NA	0.199832	0.93812	NA	-2.04585	0.433659	NA
chrI:207659-207686:-	chrI:207665:-	chrI	207659	207686	-	0.383362	0.615821	0.966091	-0.59141	0.475454	0.769809	0.0680499	0.930218	0.985358	-0.0566958	0.943459	0.985295	-2.76208	0.00356023	0.0307489
chrI:208069-208093:-	chrI:208069:-	chrI	208069	208093	-	0.0289424	0.95821	0.997165	0.13927	0.805471	0.936745	0.212342	0.70081	0.938875	0.378007	0.499114	0.831931	-0.942883	0.0985948	0.370218
chrI:208620:-	chrI:208620:-	chrI	208620	208620	-	-1.7448	0.332711	0.8453	-2.01434	0.322966	NA	-1.53941	0.392752	NA	1.49013	0.334441	NA	-0.51887	0.747366	0.948208
chrI:223022-223038:-	chrI:223038:-	chrI	223022	223038	-	-0.323045	0.664048	0.974874	-0.666848	0.398722	0.714046	-0.0792329	0.915013	0.982778	0.174692	0.815838	0.955074	1.14231	0.108863	0.393629
chrI:223164:-	chrI:223164:-	chrI	223164	223164	-	-1.24519	0.484356	NA	-2.51786	0.241279	NA	-0.666125	0.702726	NA	-0.508366	0.7746	NA	-0.598063	0.726965	NA
chrI:227258-227270:-	chrI:227270:-	chrI	227258	227270	-	-0.800231	0.198084	0.69714	-1.67702	0.02515	0.160558	-0.206735	0.732475	0.946007	1.4408	0.0119732	0.155258	1.35726	0.0157539	0.0997111
chrI:6530-6564:+	chrI:6559:+	chrI	6530	6564	+	-1.21018	0.0653778	0.376664	-0.543326	0.40999	0.721444	0.372325	0.526907	0.881946	2.89215	1.72e-07	3e-05	2.30078	2.98e-05	0.000503427
chrI:9327:+	chrI:9327:+	chrI	9327	9327	+	-2.00369	0.263504	0.782298	-1.30507	0.466692	NA	-0.143352	0.927276	NA	1.14302	0.453028	NA	-0.43514	0.780743	0.948208
chrI:9359-9391:+	chrI:9373:+	chrI	9359	9391	+	-2.52623	0.00736286	0.0847207	-2.56376	0.0177208	0.126085	-0.632321	0.414244	0.823626	1.07784	0.137056	0.528939	1.22799	0.0815521	0.327348
chrI:9420:+	chrI:9420:+	chrI	9420	9420	+	-0.349267	0.904382	NA	-1.1414	0.697017	NA	-0.199105	0.945837	NA	2.30001	0.385743	NA	2.93302	0.256979	NA
chrI:11285-11343:+	chrI:11329:+	chrI	11285	11343	+	0.293504	0.457479	0.918601	0.237572	0.556263	0.817704	0.395469	0.317851	0.752599	-0.293321	0.477225	0.821845	0.234324	0.551968	0.883964
chrI:16988-17006:+	chrI:16988:+	chrI	16988	17006	+	-1.6039	0.0846647	0.442068	-2.28196	0.0370815	0.206511	-1.91537	0.0499498	0.295411	-0.349995	0.695106	0.91604	0.713951	0.391423	0.781769
chrI:21246:+	chrI:21246:+	chrI	21246	21246	+	-0.288698	0.810298	0.987504	-1.74979	0.24383	0.573071	-1.66139	0.229031	0.660744	1.17538	0.311721	NA	-0.221227	0.852127	0.961973
chrI:21297:+	chrI:21297:+	chrI	21297	21297	+	-1.61477	0.496821	NA	-1.86045	0.46692	NA	-3.85522	0.13603	NA	0.566558	0.79957	NA	-0.62793	0.78031	NA
chrI:23372-23403:+	chrI:23384:+	chrI	23372	23403	+	-2.12472	0.0138804	0.130102	-0.882635	0.274661	0.606812	-0.192707	0.792616	0.964367	1.40938	0.0437996	0.312163	0.122973	0.862245	0.964539
chrI:23711-23713:+	chrI:23711:+	chrI	23711	23713	+	0.70005	0.636178	0.969193	0.181351	0.907147	0.9712	1.1073	0.451937	0.849237	0.715206	0.636602	NA	1.83097	0.205083	0.575871
chrI:23780:+	chrI:23780:+	chrI	23780	23780	+	0.155248	0.935247	NA	0.862985	0.651482	NA	1.11184	0.549255	NA	-2.67091	0.242869	NA	0.871348	0.637416	NA
chrI:23817:+	chrI:23817:+	chrI	23817	23817	+	-0.168367	0.896696	0.992084	-0.0181096	0.989287	0.996901	0.213484	0.867891	0.977114	0.201831	0.878783	NA	0.954695	0.436599	0.810653
chrI:24838-24850:+	chrI:24838:+	chrI	24838	24850	+	0.838981	0.132129	0.571996	0.608189	0.288231	0.619802	0.0362126	0.949717	0.989733	0.0353242	0.952052	0.987197	-4.12862	4.58e-06	9.31e-05
chrI:24965:+	chrI:24965:+	chrI	24965	24965	+	1.42457	0.391951	0.888253	1.09938	0.522894	NA	0.716043	0.675773	NA	1.11463	0.516557	NA	-3.71029	0.0858452	0.338236
chrI:25056:+	chrI:25056:+	chrI	25056	25056	+	1.55515	0.334324	0.846471	2.06587	0.201878	NA	1.53352	0.343827	NA	-1.37409	0.506895	NA	-3.62978	0.0869777	0.341601
chrI:30047-30048:+	chrI:30048:+	chrI	30047	30048	+	-0.341951	0.828363	0.988315	-1.7029	0.392408	0.709123	-0.595435	0.71586	0.942477	1.28534	0.391133	NA	2.29962	0.108602	0.393255
chrI:30118-30177:+	chrI:30118:+	chrI	30118	30177	+	-0.827282	0.145312	0.601729	-0.287886	0.617445	0.851879	0.358814	0.50052	0.871993	-1.0247	0.0995092	0.463116	3.42192	5.96e-12	3.14e-10
chrI:30203-30222:+	chrI:30203:+	chrI	30203	30222	+	1.14318	0.520152	0.944079	1.78723	0.316873	0.645349	1.75225	0.31114	0.746226	-1.22401	0.56626	0.86359	6.77205	1.74e-05	0.000312386
chrI:30435:+	chrI:30435:+	chrI	30435	30435	+	-2.01389	0.387717	NA	-1.24652	0.591146	NA	-1.78509	0.447355	NA	0.511232	0.799119	NA	1.9557	0.300096	NA
chrI:31056:+	chrI:31056:+	chrI	31056	31056	+	0.588833	0.799251	NA	-1.15074	0.649242	NA	1.3797	0.537758	NA	2.44048	0.264579	NA	3.45816	0.100988	NA
chrI:31087:+	chrI:31087:+	chrI	31087	31087	+	-0.365306	0.891553	NA	0.26742	0.920725	NA	0.802471	0.748584	NA	2.66786	0.260947	NA	2.41182	0.303394	NA
chrI:31108-31145:+	chrI:31117:+	chrI	31108	31145	+	-1.13818	0.0556457	0.338779	0.328065	0.562844	0.82189	0.0417007	0.940772	0.988064	1.50154	0.00574247	0.101215	2.03868	0.000125878	0.00179031
chrI:31179-31272:+	chrI:31242:+	chrI	31179	31272	+	-0.291776	0.260504	0.779597	-0.512568	0.0551426	0.260369	0.403196	0.116217	0.480533	1.41777	2.61e-08	5.88e-06	1.58321	3.53e-10	1.46e-08
chrI:31307-31343:+	chrI:31334:+	chrI	31307	31343	+	-0.571433	0.301487	0.821637	-0.51354	0.375115	0.694901	-0.516209	0.354985	0.782099	0.292806	0.592792	0.875672	0.7232	0.165834	0.510321
chrI:31364:+	chrI:31364:+	chrI	31364	31364	+	-2.07112	0.335669	NA	-1.18075	0.577532	NA	-2.77861	0.240184	NA	-3.75352	0.112742	NA	0.617614	0.747204	NA
chrI:31521-31532:+	chrI:31529:+	chrI	31521	31532	+	-0.216461	0.813643	0.987504	-0.0320867	0.97307	0.991048	-0.743162	0.44212	0.842466	2.13767	0.0134547	0.166396	-0.521503	0.572676	0.895171
chrI:31696-31729:+	chrI:31713:+	chrI	31696	31729	+	-0.413522	0.482667	0.928145	-0.973115	0.13296	0.419731	-0.950582	0.12391	0.496702	1.37778	0.0147669	0.176245	-1.27245	0.0383367	0.193936
chrI:31756:+	chrI:31756:+	chrI	31756	31756	+	0.563668	0.778231	0.987504	-2.07381	0.377757	NA	0.872695	0.661231	NA	2.94698	0.121449	NA	0.76828	0.696233	NA
chrI:31777:+	chrI:31777:+	chrI	31777	31777	+	-0.457322	0.784356	NA	-3.54243	0.0936138	NA	-1.59856	0.387599	NA	1.09643	0.497257	NA	-1.99769	0.280275	NA
chrI:31861:+	chrI:31861:+	chrI	31861	31861	+	-0.718405	0.406513	0.897552	-1.87679	0.0501046	0.245711	-2.21285	0.0191788	0.159467	-0.63264	0.474485	0.819969	-1.4774	0.094399	0.360319
chrI:31981:+	chrI:31981:+	chrI	31981	31981	+	-0.521534	0.784903	NA	-1.54116	0.463786	NA	-1.36678	0.494907	NA	-1.47226	0.480481	NA	-3.38507	0.140163	NA
chrI:32679:+	chrI:32679:+	chrI	32679	32679	+	-1.23469	0.502111	NA	-2.49782	0.254604	NA	-2.03736	0.302699	NA	-1.2053	0.529766	NA	-0.77861	0.66323	NA
chrI:33171-33185:+	chrI:33171:+	chrI	33171	33185	+	-0.280772	0.699674	0.98254	0.0502393	0.946517	0.983537	-0.202736	0.782511	0.961617	0.048872	0.947845	0.986032	2.3723	0.000340942	0.00427597
chrI:33223:+	chrI:33223:+	chrI	33223	33223	+	1.07097	0.683932	NA	-1.14248	0.690824	NA	-0.196054	0.94556	NA	0.38836	0.89036	NA	3.44421	0.169912	NA
chrI:33281-33284:+	chrI:33281:+	chrI	33281	33284	+	0.662843	0.619101	0.966091	1.39072	0.296418	0.628055	0.28817	0.834071	0.972751	0.379642	0.788174	NA	1.81837	0.15523	0.490228
chrI:33307:+	chrI:33307:+	chrI	33307	33307	+	-0.427406	0.749289	0.986786	-1.17841	0.419352	NA	-2.04885	0.175447	NA	-1.64085	0.280834	NA	-2.02868	0.162791	0.504562
chrI:33329-33392:+	chrI:33359:+	chrI	33329	33392	+	-0.45256	0.175693	0.661545	-0.168991	0.613835	0.849477	-1.45634	1.54e-05	0.000743152	-1.16382	0.000565777	0.021714	-2.63351	9.93e-15	7.63e-13
chrI:33767:+	chrI:33767:+	chrI	33767	33767	+	-0.0820589	0.956379	0.996248	-0.429833	0.786933	NA	-0.560374	0.717955	NA	-0.4049	0.798313	NA	-3.24671	0.0997692	0.373178
chrI:34309:+	chrI:34309:+	chrI	34309	34309	+	0.0059614	0.998219	NA	-3.36849	0.258343	NA	-3.8673	0.194391	NA	-1.21594	0.668442	NA	-1.41894	0.606568	NA
chrI:34664-34739:+	chrI:34671:+	chrI	34664	34739	+	-0.267656	0.677879	0.978338	0.245308	0.708326	0.893919	-0.0553791	0.931472	0.985358	-0.793673	0.283431	0.695285	4.12017	2.13e-13	1.34e-11
chrI:34777:+	chrI:34777:+	chrI	34777	34777	+	-0.334312	0.91584	NA	-1.13752	0.721128	NA	-0.190427	0.952332	NA	-1.16991	0.713532	NA	3.1688	0.269326	NA
chrI:34805-34813:+	chrI:34805:+	chrI	34805	34813	+	-0.918543	0.423458	0.907033	-0.468305	0.690622	0.884962	0.0492909	0.963683	0.992999	-0.669302	0.576322	NA	2.66439	0.00740777	0.0549074
chrI:34846-34864:+	chrI:34854:+	chrI	34846	34864	+	0.637573	0.647046	0.970718	-0.1273	0.934358	0.979662	-0.597713	0.69816	0.938875	0.0948634	0.949849	NA	3.02338	0.0213939	0.126683
chrI:34907:+	chrI:34907:+	chrI	34907	34907	+	-1.83591	0.619926	NA	-1.1323	0.759695	NA	-1.63112	0.659479	NA	0.192724	0.958201	NA	2.7074	0.431313	NA
chrI:34977-35155:+	chrI:35107:+	chrI	34977	35155	+	-0.599571	0.00726128	0.0837578	-0.566933	0.0118106	0.0966474	-0.922249	4.05e-05	0.0016585	-0.0202218	0.927944	0.981449	-1.28447	1.07e-08	3.58e-07
chrI:35185-35188:+	chrI:35185:+	chrI	35185	35188	+	-0.565314	0.218521	0.727979	-1.25007	0.0118755	0.0970557	-1.18539	0.0130624	0.123234	-0.431658	0.358981	0.754877	-0.240555	0.594717	0.908288
chrI:35734:+	chrI:35734:+	chrI	35734	35734	+	0.53363	0.738012	0.986317	0.709808	0.663823	NA	0.628233	0.694938	NA	1.05649	0.510593	NA	-0.948556	0.580313	0.89919
chrI:36463:+	chrI:36463:+	chrI	36463	36463	+	-0.482505	0.644818	0.970589	-0.028704	0.97845	0.992894	0.257791	0.800463	0.966998	-0.0766771	0.942568	NA	0.166846	0.868626	0.966258
chrI:36504-36595:+	chrI:36525:+	chrI	36504	36595	+	-0.230866	0.302719	0.822844	-0.579024	0.0102142	0.0878495	-0.203884	0.363091	0.787993	0.373977	0.0951626	0.452511	0.269625	0.22768	0.609017
chrI:37357-37427:+	chrI:37415:+	chrI	37357	37427	+	-0.56541	0.0345863	0.246635	-0.688445	0.0124465	0.100057	-0.576672	0.0321744	0.223226	-0.0541348	0.840487	0.96093	0.00904895	0.972582	0.992052
chrI:37449-37464:+	chrI:37461:+	chrI	37449	37464	+	-0.715825	0.120936	0.546826	-0.752597	0.121224	0.399917	-0.491088	0.286742	0.722798	0.570792	0.203545	0.614637	-0.391482	0.384733	0.777197
chrI:38010:+	chrI:38010:+	chrI	38010	38010	+	1.1141	0.507514	NA	-0.370622	0.845925	NA	-0.869088	0.648627	NA	1.02366	0.5538	NA	-1.26846	0.50601	NA
chrI:39187-39271:+	chrI:39208:+	chrI	39187	39271	+	0.105275	0.648323	0.971161	-0.0129277	0.956199	0.987096	-0.380216	0.104827	0.455599	0.137024	0.558651	0.859819	-0.401285	0.0840876	0.334183
chrI:40501:+	chrI:40501:+	chrI	40501	40501	+	4.15816	0.137345	NA	2.70468	0.357484	NA	2.20186	0.453795	NA	0.225584	0.9422	NA	-0.639513	0.837147	NA
chrI:41013:+	chrI:41013:+	chrI	41013	41013	+	4.69348	0.0844635	NA	0.257978	0.932656	NA	2.78482	0.322808	NA	1.80805	0.546658	NA	-0.639513	0.834074	NA
chrI:41262-41298:+	chrI:41291:+	chrI	41262	41298	+	6.17488	7.73e-08	7.25e-06	4.33031	0.000219609	0.00573141	4.43864	0.000134358	0.0042186	2.78826	0.0223217	0.223514	-0.642571	0.676252	0.943475
chrI:41319:+	chrI:41319:+	chrI	41319	41319	+	3.48131	0.157773	NA	-1.14329	0.686305	NA	1.38367	0.590918	NA	0.382256	0.890448	NA	-2.04078	0.470959	NA
chrI:41379:+	chrI:41379:+	chrI	41379	41379	+	-0.932937	0.527401	0.946776	-1.53587	0.358528	NA	-1.03534	0.492784	NA	-0.0475685	0.973963	NA	-0.382374	0.787403	0.948208
chrI:42104:+	chrI:42104:+	chrI	42104	42104	+	2.53078	0.224544	0.735729	2.91971	0.164337	NA	0.787715	0.727596	NA	3.42331	0.0990458	NA	-2.04981	0.40856	0.792676
chrI:42134-42221:+	chrI:42170:+	chrI	42134	42221	+	-0.291025	0.1685	0.647942	-0.320447	0.132344	0.418813	-0.495715	0.0194387	0.160925	0.704559	0.000835591	0.0283421	-0.170918	0.417656	0.798525
chrI:42342:+	chrI:42342:+	chrI	42342	42342	+	0.353208	0.786134	0.987504	-0.406996	0.773877	0.923454	0.00638181	0.99618	0.999745	-0.00524867	0.996947	NA	0.174416	0.893376	0.972316
chrI:42399:+	chrI:42399:+	chrI	42399	42399	+	1.56027	0.362132	0.867955	1.52063	0.388258	NA	-0.238925	0.901305	NA	1.83006	0.292149	NA	0.36627	0.837554	NA
chrI:42828:+	chrI:42828:+	chrI	42828	42828	+	-0.445627	0.898468	NA	1.78093	0.607675	NA	-0.240837	0.945022	NA	0.225585	0.948499	NA	4.81516	0.132517	NA
chrI:42856:+	chrI:42856:+	chrI	42856	42856	+	-0.445632	0.896864	NA	0.257974	0.940184	NA	2.20783	0.501182	NA	0.225581	0.947683	NA	4.86833	0.121112	NA
chrI:42877-42880:+	chrI:42880:+	chrI	42877	42880	+	-0.0580744	0.968874	0.997489	-2.79706	0.150036	0.448284	0.148691	0.920406	0.983692	-2.82945	0.145373	NA	3.9779	0.0024398	0.0225501
chrI:43037:+	chrI:43037:+	chrI	43037	43037	+	0.96132	0.779596	NA	0.257979	0.940337	NA	-0.240836	0.944295	NA	0.225587	0.947817	NA	4.94058	0.116707	NA
chrI:43089:+	chrI:43089:+	chrI	43089	43089	+	0.0533963	0.977941	0.998579	-2.18416	0.332201	NA	0.346156	0.856902	NA	-0.828652	0.707144	NA	3.45068	0.0483148	0.228206
chrI:43160:+	chrI:43160:+	chrI	43160	43160	+	1.53971	0.517697	NA	0.267324	0.920156	NA	0.797344	0.748104	NA	0.199029	0.940058	NA	2.81646	0.222072	NA
chrI:43205:+	chrI:43205:+	chrI	43205	43205	+	-0.627164	0.725838	NA	0.0261015	0.988388	NA	-1.47598	0.445153	NA	-3.45224	0.114242	NA	0.382189	0.822898	NA
chrI:43438:+	chrI:43438:+	chrI	43438	43438	+	0.380553	0.653199	0.972737	-0.029833	0.973843	0.991375	0.453226	0.594839	0.908169	0.322842	0.71478	0.920596	2.0036	0.0129015	0.0851387
chrI:43469:+	chrI:43469:+	chrI	43469	43469	+	1.09167	0.579914	0.96253	2.53885	0.181255	NA	2.90372	0.116172	NA	2.57613	0.173873	NA	3.6521	0.0440663	0.21328
chrI:43541:+	chrI:43541:+	chrI	43541	43541	+	1.19973	0.571956	0.96064	3.11789	0.124508	NA	2.36924	0.246193	NA	1.25393	0.569756	NA	3.42878	0.0846412	0.335357
chrI:44209:+	chrI:44209:+	chrI	44209	44209	+	1.06883	0.699741	NA	2.4365	0.370528	NA	-0.197983	0.947394	NA	-1.17262	0.696024	NA	2.4191	0.366871	NA
chrI:44801:+	chrI:44801:+	chrI	44801	44801	+	0.368523	0.867542	NA	1.07976	0.624966	NA	-1.11769	0.656423	NA	0.868718	0.696779	NA	2.18603	0.297197	NA
chrI:44921:+	chrI:44921:+	chrI	44921	44921	+	-0.433433	0.878517	NA	2.75637	0.276853	NA	1.38404	0.593929	NA	-1.1753	0.680116	NA	2.31377	0.357515	NA
chrI:45693-45697:+	chrI:45693:+	chrI	45693	45697	+	1.61838	0.0743711	0.407616	1.40683	0.130543	0.415745	1.64796	0.0702576	0.365615	0.277197	0.778464	0.943521	-0.135185	0.887773	0.971413
chrI:45721-45849:+	chrI:45751:+	chrI	45721	45849	+	0.233493	0.447404	0.916477	-0.357039	0.251141	0.581546	-0.17447	0.57195	0.898596	-0.365819	0.239709	0.652839	-0.942003	0.00236878	0.0220009
chrI:45871-45899:+	chrI:45874:+	chrI	45871	45899	+	-0.367124	0.512327	0.940452	-1.14314	0.0600164	0.273028	-0.838121	0.146022	0.536898	-0.280321	0.625559	0.891235	-1.82664	0.0022555	0.0211782
chrI:47021-47034:+	chrI:47034:+	chrI	47021	47034	+	-0.61921	0.634205	0.968936	-0.124275	0.924945	NA	-0.0420307	0.973696	0.995204	-0.374184	0.780207	NA	-1.31025	0.331053	0.737479
chrI:48222:+	chrI:48222:+	chrI	48222	48222	+	-0.131505	0.937728	NA	-0.90018	0.628556	NA	0.326727	0.84451	NA	-2.06731	0.321638	NA	0.364293	0.82452	NA
chrI:48484-48511:+	chrI:48511:+	chrI	48484	48511	+	0.300999	0.580551	0.96253	0.355091	0.524194	0.799522	-0.270371	0.629614	0.919518	-0.439563	0.449834	0.808383	-0.545793	0.327771	0.733603
chrI:48534-48593:+	chrI:48539:+	chrI	48534	48593	+	0.262999	0.326814	0.841279	0.356012	0.191349	0.508444	0.0812741	0.763967	0.955201	-0.186903	0.50111	0.833007	-0.548318	0.0442616	0.214006
chrI:48779-48795:+	chrI:48795:+	chrI	48779	48795	+	-0.06426	0.945623	0.995613	-1.42291	0.195271	0.513389	-0.905627	0.363855	0.788501	0.0616928	0.949138	NA	-1.43955	0.153166	0.486114
chrI:50825-50867:+	chrI:50855:+	chrI	50825	50867	+	6.98934	5.84e-05	0.00197554	3.7375	0.0456839	0.232253	5.59389	0.00146195	0.026951	0.225591	0.920214	NA	-0.639508	0.776451	0.948208
chrI:52829-52851:+	chrI:52851:+	chrI	52829	52851	+	0.415066	0.622446	0.966091	0.104653	0.906687	0.970807	1.09021	0.188327	0.608512	-0.339025	0.713658	0.920092	0.991472	0.227741	0.609125
chrI:54214:+	chrI:54214:+	chrI	54214	54214	+	1.57458	0.300951	0.821345	0.971808	0.544814	NA	1.20842	0.435534	NA	0.786024	0.627659	NA	-0.25158	0.877991	0.96857
chrI:54918-54921:+	chrI:54921:+	chrI	54918	54921	+	0.890648	0.303823	0.823063	0.95483	0.288045	0.619728	1.40514	0.100085	0.444145	0.107836	0.910871	0.979426	3.08642	0.00015693	0.00217189
chrI:56978-56984:+	chrI:56984:+	chrI	56978	56984	+	-0.620959	0.540027	0.951321	-1.37217	0.238805	0.56731	-0.870121	0.406089	0.818993	-1.48165	0.207572	NA	1.53981	0.099557	0.372772
chrI:57432:+	chrI:57432:+	chrI	57432	57432	+	-0.256485	0.879463	NA	-0.25943	0.8835	NA	-2.3121	0.275766	NA	1.18538	0.469382	NA	-0.478886	0.777433	NA
chrI:57465-57532:+	chrI:57517:+	chrI	57465	57532	+	-0.641176	0.00231921	0.036645	-0.355364	0.0928723	0.345564	-0.38876	0.0646323	0.348061	0.313045	0.136111	0.526561	-0.142827	0.495198	0.850272
chrI:61261-61328:+	chrI:61300:+	chrI	61261	61328	+	-0.0677915	0.695246	0.981993	0.0136854	0.937149	0.980618	-0.215638	0.213395	0.639532	0.453723	0.00879307	0.130873	-0.17994	0.298298	0.70229
chrI:61447-61464:+	chrI:61447:+	chrI	61447	61464	+	-1.1951	0.349053	0.857105	-0.794803	0.541297	0.808701	-2.91456	0.0596442	0.331237	-0.142921	0.909119	NA	-0.718672	0.56091	0.888664
chrI:61606:+	chrI:61606:+	chrI	61606	61606	+	-1.82989	0.144168	0.600066	0.156249	0.88947	0.965643	-0.623133	0.586078	0.904108	-0.203054	0.859708	NA	0.447551	0.675654	0.9432
chrI:61632-61658:+	chrI:61632:+	chrI	61632	61658	+	-1.35872	0.114019	0.530939	-0.654286	0.446627	0.749862	-1.75036	0.0517248	0.302238	0.276633	0.73595	0.927439	-0.736354	0.371827	0.769748
chrI:61723:+	chrI:61723:+	chrI	61723	61723	+	-0.941853	0.281709	0.802754	0.609519	0.464434	0.763627	-1.11106	0.217831	0.64612	0.259781	0.759023	0.936549	-1.01919	0.240281	0.627595
chrI:61762-61774:+	chrI:61774:+	chrI	61762	61774	+	0.302819	0.740393	0.986353	1.2499	0.16641	0.473624	0.707178	0.434504	0.837193	1.61609	0.0692263	0.393938	1.18993	0.174858	0.525618
chrI:61829:+	chrI:61829:+	chrI	61829	61829	+	-0.331535	0.846272	NA	0.911074	0.583938	NA	-1.18039	0.525943	NA	-0.712639	0.701692	NA	0.682917	0.674258	NA
chrI:62088:+	chrI:62088:+	chrI	62088	62088	+	0.544682	0.585442	0.963434	2.45854	0.0108125	0.09135	0.769127	0.440742	0.842212	1.20786	0.226911	0.640812	0.819959	0.403868	0.790426
chrI:62124:+	chrI:62124:+	chrI	62124	62124	+	-2.55799	0.289521	NA	-4.19676	0.107439	NA	-4.69558	0.0716793	NA	-2.85818	0.266006	NA	-0.977489	0.663396	NA
chrI:62275:+	chrI:62275:+	chrI	62275	62275	+	0.45352	0.81676	NA	0.174816	0.933385	NA	1.75713	0.349837	NA	1.61833	0.398491	NA	0.837446	0.661052	NA
chrI:62310-62311:+	chrI:62310:+	chrI	62310	62311	+	-0.422606	0.620703	0.966091	-1.07973	0.24636	0.575744	-0.457432	0.596139	0.908643	-1.35664	0.154835	0.557749	0.0826662	0.921048	0.979226
chrI:62374-62385:+	chrI:62385:+	chrI	62374	62385	+	0.870989	0.455665	0.91822	0.493957	0.688503	0.884512	0.755605	0.522684	0.880695	0.536845	0.661648	NA	-0.100301	0.93391	0.98337
chrI:62412-62421:+	chrI:62412:+	chrI	62412	62421	+	2.30475	0.0866515	0.449148	2.08742	0.1307	0.415751	2.72087	0.042226	0.266735	2.06277	0.135396	NA	1.53448	0.261042	0.654751
chrI:62448-62460:+	chrI:62449:+	chrI	62448	62460	+	-0.37305	0.725046	0.985238	-0.593119	0.594829	0.83904	0.102089	0.922527	0.984105	-1.76187	0.155938	NA	-0.342786	0.744502	0.948208
chrI:62765-62832:+	chrI:62776:+	chrI	62765	62832	+	0.384782	0.132067	0.571955	0.270345	0.295441	0.627197	0.0370203	0.885571	0.979732	-0.494548	0.0599738	0.372017	-0.340203	0.185962	0.543818
chrI:62936:+	chrI:62936:+	chrI	62936	62936	+	-0.0136276	0.99153	0.999802	-1.05362	0.471594	0.767826	0.0569629	0.96482	0.993236	0.431418	0.73971	NA	0.358483	0.775499	0.948208
chrI:65262:+	chrI:65262:+	chrI	65262	65262	+	0.191355	0.887223	0.990954	2.36037	0.0620097	0.277911	1.50918	0.237742	0.671044	0.189575	0.894019	NA	0.834235	0.518414	0.864935
chrI:65308-65324:+	chrI:65324:+	chrI	65308	65324	+	-0.577837	0.657307	0.973637	0.597331	0.638867	0.861421	0.607204	0.62695	0.91869	0.294432	0.819419	NA	-0.0269478	0.982931	0.995415
chrI:65442:+	chrI:65442:+	chrI	65442	65442	+	4.06498	0.0776288	NA	3.70493	0.11671	NA	4.36812	0.0575242	NA	2.88312	0.237645	NA	-0.639521	0.81083	NA
chrI:65470-65478:+	chrI:65478:+	chrI	65470	65478	+	3.1162	0.000338127	0.00824158	2.43876	0.00656162	0.0644538	2.71837	0.00197034	0.033777	1.32367	0.161453	0.5652	-0.617556	0.552065	0.883985
chrI:65502-65527:+	chrI:65527:+	chrI	65502	65527	+	4.65121	5.22e-06	0.000272961	3.29979	0.00172462	0.0255863	4.22189	3.91e-05	0.00161237	2.88861	0.00670383	0.111245	0.149507	0.900648	0.97459
chrI:65679-65681:+	chrI:65681:+	chrI	65679	65681	+	4.16383	0.0139308	0.130426	3.79399	0.0274536	0.170658	3.06766	0.0760731	0.382042	3.16595	0.0699871	NA	1.34437	0.45946	0.827355
chrI:65704:+	chrI:65704:+	chrI	65704	65704	+	5.14395	0.00628681	0.075138	4.46356	0.0208835	NA	4.52494	0.0176128	NA	3.57258	0.0734627	NA	1.7994	0.394548	0.784349
chrI:68003-68026:+	chrI:68003:+	chrI	68003	68026	+	0.523296	0.7984	0.987504	-1.16015	0.610885	0.848095	0.78645	0.699675	0.938875	-1.19255	0.600962	NA	5.89037	0.000888321	0.00971714
chrI:68174:+	chrI:68174:+	chrI	68174	68174	+	-0.435185	0.863894	NA	0.328436	0.896674	NA	1.7966	0.420392	NA	2.40162	0.279444	NA	3.2726	0.126855	NA
chrI:68195:+	chrI:68195:+	chrI	68195	68195	+	-1.02676	0.557552	0.957731	-0.325042	0.852733	NA	-0.795854	0.648696	NA	0.376122	0.821776	NA	0.675974	0.671991	NA
chrI:68692-68732:+	chrI:68707:+	chrI	68692	68732	+	-0.221059	0.652196	0.972468	0.110446	0.825957	0.944278	0.135838	0.779995	0.960943	-0.329053	0.525927	0.844696	2.67599	3.52e-09	1.25e-07
chrI:69944-69947:+	chrI:69947:+	chrI	69944	69947	+	-1.02858	0.459054	0.919006	-0.681033	0.636684	0.860103	-0.784536	0.570826	0.898124	1.81116	0.141428	NA	0.869848	0.480781	0.841548
chrI:70045:+	chrI:70045:+	chrI	70045	70045	+	-0.0880158	0.967648	NA	-0.89691	0.713153	NA	-2.81016	0.253074	NA	2.39086	0.242326	NA	0.768123	0.711905	NA
chrI:71552:+	chrI:71552:+	chrI	71552	71552	+	0.959751	0.793443	NA	0.257974	0.944053	NA	-0.240841	0.947764	NA	0.225581	0.951069	NA	4.65746	0.171067	NA
chrI:71644-73230:+	chrI:71763:+	chrI	71644	73230	+	0.0582318	0.75119	0.986786	0.577053	0.00167976	0.0251254	0.135056	0.462143	0.854382	-0.128352	0.484929	0.826163	-0.328076	0.0740748	0.305408
chrI:73439:+	chrI:73439:+	chrI	73439	73439	+	-1.12407	0.437832	0.91307	-0.0782337	0.955768	0.986968	0.078667	0.953742	0.990921	0.626796	0.642939	NA	0.045582	0.972761	0.992074
chrI:73836-73851:+	chrI:73836:+	chrI	73836	73851	+	-1.04393	0.339364	0.849786	-2.06203	0.111991	0.384252	-1.12588	0.312071	0.7473	-0.551862	0.617863	NA	-0.292326	0.779634	0.948208
chrI:73872-73952:+	chrI:73921:+	chrI	73872	73952	+	-0.757878	0.0437206	0.289109	-0.837279	0.034307	0.197496	-0.469028	0.209963	0.635517	0.600736	0.0999684	0.464055	0.25213	0.483092	0.842781
chrI:76335-76452:+	chrI:76401:+	chrI	76335	76452	+	-0.085768	0.627406	0.967122	0.341381	0.053646	0.25616	-0.115485	0.513797	0.877196	0.748326	2.27e-05	0.00191125	-0.181017	0.305479	0.709312
chrI:76483-76485:+	chrI:76483:+	chrI	76483	76485	+	-1.67129	0.223617	0.734348	0.0456242	0.970685	0.990453	-1.07136	0.414338	0.823626	1.831	0.108271	NA	0.274436	0.813823	0.949485
chrI:76555:+	chrI:76555:+	chrI	76555	76555	+	0.509359	0.634088	0.968911	1.75849	0.0919475	0.344252	-0.239911	0.834143	0.972751	1.8491	0.0752036	NA	1.34183	0.191287	0.552998
chrI:76587:+	chrI:76587:+	chrI	76587	76587	+	0.311858	0.872321	NA	-1.40512	0.543732	NA	0.439168	0.821435	NA	1.00492	0.604519	NA	-0.635752	0.751741	NA
chrI:76619:+	chrI:76619:+	chrI	76619	76619	+	1.58118	0.416048	0.903143	3.31626	0.0769034	NA	2.37006	0.212019	NA	3.29278	0.0790646	NA	2.50879	0.179907	0.533407
chrI:76641:+	chrI:76641:+	chrI	76641	76641	+	-1.48604	0.388906	0.887233	0.0652646	0.968009	NA	-1.78103	0.325328	NA	0.493159	0.756998	NA	-1.63544	0.341253	NA
chrI:76666-76671:+	chrI:76671:+	chrI	76666	76671	+	0.490387	0.650563	0.971855	1.77035	0.0942285	0.348792	0.902649	0.399971	0.814519	1.79361	0.0895924	NA	0.272198	0.801737	0.948208
chrI:76709-76715:+	chrI:76715:+	chrI	76709	76715	+	2.48942	0.0976289	0.482215	2.69877	0.0762471	0.31126	2.15543	0.157305	0.557837	3.36537	0.0245863	NA	1.22642	0.430139	0.806048
chrI:76860:+	chrI:76860:+	chrI	76860	76860	+	-0.170684	0.910044	0.993278	0.673697	0.653237	NA	-0.164319	0.914368	NA	1.20377	0.411136	NA	-0.947318	0.546118	0.880755
chrI:76883-76894:+	chrI:76893:+	chrI	76883	76894	+	0.762314	0.52377	0.945791	1.29848	0.280594	0.611662	0.978524	0.412887	0.822958	0.297925	0.814393	NA	1.07073	0.363096	0.762868
chrI:76926:+	chrI:76926:+	chrI	76926	76926	+	-0.67698	0.732603	NA	0.467543	0.809163	NA	-1.09225	0.597887	NA	-0.620414	0.764486	NA	-0.950101	0.633288	NA
chrI:76952-77020:+	chrI:77000:+	chrI	76952	77020	+	0.397928	0.453837	0.917537	1.01175	0.0577193	0.266815	-0.0936246	0.864525	0.976755	1.21409	0.0216935	0.220143	0.638157	0.223105	0.602433
chrI:77061:+	chrI:77061:+	chrI	77061	77061	+	1.08929	0.624687	NA	1.18719	0.600117	NA	-0.383043	0.872247	NA	0.424451	0.855907	NA	-1.81983	0.478188	NA
chrI:77093-77095:+	chrI:77093:+	chrI	77093	77095	+	1.14491	0.495051	0.933887	2.31188	0.161037	0.465247	1.93008	0.240189	0.673698	2.01772	0.225692	NA	2.01846	0.213731	0.58886
chrI:77166-77199:+	chrI:77198:+	chrI	77166	77199	+	0.723582	0.253429	0.771567	0.565026	0.386899	0.705136	0.0462919	0.943526	0.988685	0.280973	0.671033	0.908394	-0.104668	0.871462	0.966785
chrI:77240:+	chrI:77240:+	chrI	77240	77240	+	-0.90627	0.5003	0.9359	-0.593645	0.667794	0.875264	-0.32024	0.807567	0.968328	0.661682	0.606849	NA	0.47687	0.704678	0.948208
chrI:77338:+	chrI:77338:+	chrI	77338	77338	+	3.06481	0.291737	NA	3.41687	0.243625	NA	1.20011	0.704717	NA	1.8206	0.558938	NA	3.32476	0.248987	NA
chrI:77441:+	chrI:77441:+	chrI	77441	77441	+	-0.0163113	0.98922	0.999687	1.07153	0.368019	0.688573	0.298734	0.80368	0.967297	-1.82706	0.222357	NA	0.752508	0.5208	0.866289
chrI:77491:+	chrI:77491:+	chrI	77491	77491	+	-0.433689	0.796843	0.987504	1.01168	0.539189	NA	-1.40946	0.432619	NA	-0.712939	0.686913	NA	-1.84581	0.305626	0.709382
chrI:77513-77516:+	chrI:77513:+	chrI	77513	77516	+	0.62047	0.670749	0.976252	-0.0722163	0.962817	NA	-0.0189868	0.989925	0.9984	0.448099	0.765891	NA	-0.534823	0.723631	0.948208
chrI:77804:+	chrI:77804:+	chrI	77804	77804	+	0.242576	0.718849	0.98496	0.531396	0.438298	0.743928	-0.0384985	0.955365	0.991069	-0.601222	0.414751	0.790216	0.115736	0.863327	0.964539
chrI:78288:+	chrI:78288:+	chrI	78288	78288	+	0.773887	0.718217	NA	0.826178	0.707058	NA	1.21144	0.569549	NA	-2.3477	0.348513	NA	0.238866	0.912363	NA
chrI:78330:+	chrI:78330:+	chrI	78330	78330	+	1.24469	0.337932	0.848627	2.11033	0.102345	0.364891	1.03255	0.43438	0.837076	0.537256	0.70145	NA	1.91628	0.130917	0.442041
chrI:78536:+	chrI:78536:+	chrI	78536	78536	+	1.25665	0.472413	0.924682	0.956532	0.594421	NA	0.99068	0.575044	NA	0.0559519	0.976173	NA	-0.0800217	0.964664	0.990289
chrI:78627:+	chrI:78627:+	chrI	78627	78627	+	1.69209	0.314953	0.833886	2.12083	0.211822	NA	1.9307	0.251036	NA	1.0196	0.568775	NA	0.298362	0.866354	0.965824
chrI:78714:+	chrI:78714:+	chrI	78714	78714	+	-3.26758	0.195914	NA	-2.56609	0.309578	NA	-1.44253	0.522072	NA	-1.23735	0.588311	NA	-2.57772	0.273532	NA
chrI:78765:+	chrI:78765:+	chrI	78765	78765	+	1.38039	0.239419	0.755426	1.91837	0.103927	0.367998	1.74858	0.134243	0.516033	0.754809	0.545172	NA	1.05058	0.372772	0.770455
chrI:78807-78836:+	chrI:78807:+	chrI	78807	78836	+	0.348261	0.665461	0.97494	0.901235	0.266337	0.596655	0.347466	0.668998	0.93188	-0.387549	0.660437	0.904561	0.487061	0.540352	0.876944
chrI:78985:+	chrI:78985:+	chrI	78985	78985	+	0.1009	0.966588	NA	1.38226	0.558019	NA	0.74821	0.752146	NA	-0.00661772	0.997899	NA	-1.6888	0.524628	NA
chrI:79045:+	chrI:79045:+	chrI	79045	79045	+	0.509605	0.78468	NA	1.12932	0.546059	NA	-0.2883	0.882806	NA	-0.0440909	0.98229	NA	-0.111975	0.952937	NA
chrI:79081-79115:+	chrI:79088:+	chrI	79081	79115	+	0.329509	0.478302	0.926112	1.10806	0.0168205	0.121999	0.312915	0.504352	0.873943	0.138469	0.775048	0.942421	0.446634	0.331644	0.737998
chrI:79258:+	chrI:79258:+	chrI	79258	79258	+	-0.125276	0.91394	0.993278	1.642	0.137806	0.42806	1.28646	0.242878	0.676972	0.0811352	0.94594	NA	0.645568	0.560894	0.888664
chrI:79361:+	chrI:79361:+	chrI	79361	79361	+	0.57585	0.731858	0.985974	1.55523	0.350049	NA	0.0562934	0.974193	NA	0.530296	0.76063	NA	0.853127	0.606124	0.914222
chrI:79674-79718:+	chrI:79689:+	chrI	79674	79718	+	-0.232281	0.432666	0.909854	-0.413051	0.169553	0.47718	-0.362254	0.223277	0.653983	0.133629	0.653285	0.90179	-0.012283	0.966751	0.990958
chrI:80559:+	chrI:80559:+	chrI	80559	80559	+	3.10631	0.125442	NA	2.27497	0.280176	NA	2.30375	0.265656	NA	1.18654	0.59481	NA	0.210587	0.92541	NA
chrI:80923-80938:+	chrI:80923:+	chrI	80923	80938	+	6.21603	0.000343581	0.00833732	4.88497	0.00622141	0.0622262	5.65901	0.00120155	0.0232495	3.50192	0.0627144	NA	3.73647	0.0376717	0.191524
chrI:82226-82237:+	chrI:82226:+	chrI	82226	82237	+	0.907576	0.336446	0.847688	0.494729	0.618711	0.852447	-0.370103	0.71663	0.942477	-3.06679	0.0588194	NA	1.66852	0.0705962	0.295692
chrI:82665-82766:+	chrI:82688:+	chrI	82665	82766	+	-0.479293	0.0128693	0.123668	-0.577844	0.00295997	0.0374566	-0.227388	0.237763	0.671044	-0.222477	0.250348	0.663064	0.216074	0.25946	0.652476
chrI:83072:+	chrI:83072:+	chrI	83072	83072	+	-2.55207	0.259918	NA	-0.27096	0.890157	NA	-0.00388852	0.998355	NA	-0.49678	0.802759	NA	-0.713409	0.709175	NA
chrI:83119:+	chrI:83119:+	chrI	83119	83119	+	0.421985	0.859203	NA	0.246398	0.923001	NA	2.71152	0.216615	NA	2.59224	0.244089	NA	1.23707	0.584084	NA
chrI:87237-87294:+	chrI:87264:+	chrI	87237	87294	+	-0.135827	0.496403	0.934828	-0.080144	0.689714	0.884681	-0.102872	0.60686	0.912591	0.592149	0.00302036	0.067753	-0.302597	0.12966	0.439417
chrI:87321-87329:+	chrI:87329:+	chrI	87321	87329	+	0.546257	0.679948	0.97882	0.706162	0.602477	0.843858	-0.417071	0.767138	0.956249	1.79031	0.169047	NA	-0.734094	0.600204	0.911064
chrI:87595:+	chrI:87595:+	chrI	87595	87595	+	0.221788	0.907604	0.993278	0.977613	0.608255	NA	0.836408	0.657218	NA	0.175478	0.929308	NA	-0.824211	0.679205	NA
chrI:92388:+	chrI:92388:+	chrI	92388	92388	+	0.268882	0.884808	NA	-2.81783	0.212831	NA	0.449104	0.808956	NA	0.730972	0.696552	NA	0.41359	0.821491	NA
chrI:92836-92859:+	chrI:92849:+	chrI	92836	92859	+	0.394908	0.301426	0.821637	0.478729	0.217851	0.542262	-0.17532	0.653427	0.927365	0.147267	0.707799	0.919458	-0.808817	0.0401456	0.20019
chrI:92885-92893:+	chrI:92885:+	chrI	92885	92893	+	0.445549	0.608972	0.965173	0.301399	0.73952	0.90789	-0.263104	0.772481	0.957858	0.497946	0.578193	NA	-0.88187	0.339657	0.744112
chrI:93718:+	chrI:93718:+	chrI	93718	93718	+	4.47434	0.0483777	NA	4.45635	0.0519911	NA	2.78511	0.241083	NA	0.225585	0.932203	NA	0.763968	0.771191	NA
chrI:94106-94114:+	chrI:94106:+	chrI	94106	94114	+	2.95191	0.0106603	0.109114	1.98954	0.0985579	0.357235	2.60425	0.02557	0.193039	-0.234941	0.869261	NA	1.39544	0.241479	0.628984
chrI:94250-94278:+	chrI:94250:+	chrI	94250	94278	+	2.80547	0.0139285	0.130426	1.90956	0.108581	0.377226	2.19633	0.0581647	0.326077	0.119659	0.929299	NA	1.15207	0.330351	0.736431
chrI:94310:+	chrI:94310:+	chrI	94310	94310	+	1.93854	0.386631	NA	1.20463	0.614222	NA	2.79953	0.20428	NA	0.200155	0.93734	NA	2.61103	0.234816	NA
chrI:94549:+	chrI:94549:+	chrI	94549	94549	+	1.50558	0.362961	NA	1.05845	0.538691	NA	0.535344	0.756075	NA	-2.7639	0.199229	NA	-0.18145	0.917578	NA
chrI:94579-94695:+	chrI:94595:+	chrI	94579	94695	+	-0.0842186	0.663311	0.97483	-0.258211	0.188772	0.505543	-0.190801	0.326119	0.759379	-0.260082	0.185537	0.594398	-0.284436	0.141551	0.464321
chrI:95059:+	chrI:95059:+	chrI	95059	95059	+	1.66598	0.165634	0.64194	0.978556	0.440256	0.74556	0.821655	0.509478	0.874557	0.754805	0.556383	NA	0.527219	0.670737	0.941581
chrI:95118-95176:+	chrI:95146:+	chrI	95118	95176	+	1.37339	1.97e-05	0.000812813	0.72675	0.0292611	0.178064	1.1939	0.000229343	0.00645576	0.0902345	0.792622	0.947962	-0.688932	0.0436174	0.211758
chrI:95242-95250:+	chrI:95250:+	chrI	95242	95250	+	3.99838	0.0324374	0.236137	1.28358	0.542287	NA	3.48825	0.0643548	NA	2.6894	0.166826	NA	-2.055	0.379925	0.774578
chrI:95279-95305:+	chrI:95305:+	chrI	95279	95305	+	3.20581	0.0177694	0.153997	3.69554	0.00647772	0.0639552	3.01444	0.0268842	0.199251	2.07202	0.146597	NA	-3.07455	0.11603	0.409183
chrI:95331-95355:+	chrI:95344:+	chrI	95331	95355	+	2.32732	0.0762249	0.413077	2.09451	0.120316	0.398862	3.16018	0.0149426	0.134342	-0.345311	0.83231	NA	-3.63603	0.0587294	0.26046
chrI:96033-96063:+	chrI:96033:+	chrI	96033	96063	+	5.67179	0.00692005	0.0808467	3.90773	0.073901	NA	4.65952	0.0283726	NA	0.225586	0.929002	NA	-0.639513	0.800584	0.948208
chrI:101399-101418:+	chrI:101399:+	chrI	101399	101418	+	2.75558	0.105673	0.507139	3.07305	0.0746048	0.308251	3.48026	0.0385982	0.250893	1.22396	0.52523	NA	5.28726	0.00130835	0.0134718
chrI:101445-101465:+	chrI:101465:+	chrI	101445	101465	+	3.11382	0.014884	0.136273	2.62899	0.0469893	0.235769	3.50942	0.00588173	0.0723198	2.1444	0.112666	0.488378	5.3475	1.86e-05	0.00033139
chrI:110643-110680:+	chrI:110664:+	chrI	110643	110680	+	1.89279	5.8e-07	4.23e-05	1.56709	5.64e-05	0.00194555	1.8351	1.43e-06	0.000104139	2.0429	9.86e-08	1.95e-05	0.839625	0.0300168	0.162476
chrI:110701:+	chrI:110701:+	chrI	110701	110701	+	3.29991	0.157553	NA	1.67264	0.527736	NA	3.20746	0.173226	NA	4.18266	0.0718508	NA	3.45873	0.135232	NA
chrI:110727:+	chrI:110727:+	chrI	110727	110727	+	1.10934	0.552174	0.95549	1.09798	0.567752	NA	0.971464	0.607098	NA	0.300829	0.881478	NA	1.58577	0.387023	NA
chrI:113552-113595:+	chrI:113591:+	chrI	113552	113595	+	0.822679	0.336776	0.847997	1.801	0.0327309	0.191573	2.17939	0.00743538	0.0841277	0.0409461	0.966528	0.990719	4.74252	1.37e-09	5.24e-08
chrI:114786-114832:+	chrI:114809:+	chrI	114786	114832	+	0.272239	0.331938	0.845165	0.577828	0.0414044	0.219222	0.392462	0.162634	0.567262	0.214129	0.45469	0.810392	-0.0730724	0.795253	0.948208
chrI:114858-114862:+	chrI:114862:+	chrI	114858	114862	+	0.846378	0.315307	0.83415	1.08495	0.207374	0.528686	0.577832	0.50202	0.873071	0.750869	0.391103	0.7742	1.09537	0.187215	0.545879
chrI:116487:+	chrI:116487:+	chrI	116487	116487	+	2.10658	0.469102	NA	4.29246	0.125445	NA	2.19634	0.45244	NA	1.59276	0.603246	NA	0.893452	0.770362	NA
chrI:118061-118063:+	chrI:118061:+	chrI	118061	118063	+	1.00664	0.366641	0.871746	1.44928	0.197292	0.515783	0.313081	0.786086	0.962281	0.373825	0.751555	NA	1.11959	0.311587	0.715927
chrI:119850-119891:+	chrI:119858:+	chrI	119850	119891	+	0.321644	0.272599	0.793167	0.304128	0.305239	0.635912	-0.236546	0.425536	0.830905	-0.452189	0.134929	0.525063	-1.051	0.00045787	0.0054867
chrI:119960:+	chrI:119960:+	chrI	119960	119960	+	-0.44952	0.758817	0.986786	0.354876	0.80771	NA	-3.24746	0.102624	NA	-1.25832	0.4359	NA	-3.61479	0.0631349	0.273844
chrI:120209:+	chrI:120209:+	chrI	120209	120209	+	1.53929	0.497979	NA	2.35458	0.298043	NA	2.38383	0.284704	NA	1.93748	0.399002	NA	0.271223	0.909985	NA
chrI:122135:+	chrI:122135:+	chrI	122135	122135	+	0.929916	0.585942	NA	0.931947	0.595218	NA	-0.869798	0.650905	NA	0.491782	0.783985	NA	-1.15895	0.542375	NA
chrI:123230:+	chrI:123230:+	chrI	123230	123230	+	4.69351	0.101335	NA	0.257979	0.935386	NA	3.20186	0.27394	NA	0.225586	0.943485	NA	-0.639511	0.840725	NA
chrI:123523:+	chrI:123523:+	chrI	123523	123523	+	4.12769	0.111497	NA	3.16588	0.239493	NA	3.52762	0.179391	NA	1.79312	0.532526	NA	-0.639522	0.827067	NA
chrI:123544-123583:+	chrI:123583:+	chrI	123544	123583	+	7.10201	1.29e-05	0.000580301	6.03514	0.000256351	0.0064614	6.33025	0.000110683	0.00362022	3.9528	0.0235243	0.228417	-0.639521	0.768077	0.948208
chrI:124782-124845:+	chrI:124792:+	chrI	124782	124845	+	-0.0643763	0.747761	0.986786	-0.21323	0.288656	0.620457	-0.277499	0.166342	0.573136	0.0948328	0.636433	0.895497	-0.379066	0.0583884	0.25938
chrI:124874:+	chrI:124874:+	chrI	124874	124874	+	-0.369207	0.76207	0.987276	0.168618	0.891085	0.966054	-0.473446	0.703188	0.939189	0.624995	0.602614	NA	0.0174907	0.98824	0.996487
chrI:125726:+	chrI:125726:+	chrI	125726	125726	+	0.900894	0.62946	NA	0.813005	0.676044	NA	1.75939	0.335435	NA	0.747829	0.701423	NA	-0.186106	0.924314	NA
chrI:126111:+	chrI:126111:+	chrI	126111	126111	+	-0.0436469	0.968429	0.997489	0.158003	0.888812	0.965285	-1.08093	0.363676	0.788427	-0.293138	0.800711	NA	-1.06012	0.357834	0.759418
chrI:127043-127048:+	chrI:127043:+	chrI	127043	127048	+	2.78482	0.120464	0.54567	2.62191	0.155141	0.456552	3.10647	0.082377	0.400278	0.274871	0.900218	NA	4.80013	0.00590091	0.0460617
chrI:127087:+	chrI:127087:+	chrI	127087	127087	+	0.285582	0.889365	NA	1.31779	0.513977	NA	1.19261	0.548584	NA	-2.10446	0.374573	NA	1.92759	0.318072	NA
chrI:128209:+	chrI:128209:+	chrI	128209	128209	+	0.128048	0.934899	0.994718	-0.735566	0.668277	NA	-0.731392	0.657933	NA	-2.20706	0.270224	NA	0.860797	0.573605	0.895767
chrI:129200-129254:+	chrI:129236:+	chrI	129200	129254	+	-0.152857	0.54705	0.953869	0.0932281	0.714598	0.896377	-0.247363	0.331071	0.763068	0.555791	0.0285491	0.253307	-0.188789	0.456517	0.825187
chrI:129402:+	chrI:129402:+	chrI	129402	129402	+	0.557616	0.760787	0.986921	1.31198	0.472616	NA	-1.2383	0.576243	NA	2.93435	0.0900757	NA	-1.60218	0.461456	0.828521
chrI:130686-130799:+	chrI:130744:+	chrI	130686	130799	+	0.105328	0.636543	0.969283	0.29272	0.189841	0.506682	0.0923988	0.678669	0.933792	0.080233	0.719568	0.921947	-0.167484	0.452529	0.821848
chrI:130973-130977:+	chrI:130977:+	chrI	130973	130977	+	0.690229	0.421582	0.906149	1.20428	0.163095	0.468744	-0.411675	0.649424	0.926376	-0.145555	0.873979	0.972389	-0.106475	0.90324	0.975291
chrI:131008:+	chrI:131008:+	chrI	131008	131008	+	-0.360062	0.895811	NA	2.17564	0.381584	NA	2.60583	0.283846	NA	0.198121	0.942323	NA	1.04744	0.676036	NA
chrI:131045:+	chrI:131045:+	chrI	131045	131045	+	-0.152774	0.946231	NA	-0.284506	0.90312	NA	-0.256125	0.910832	NA	-3.22629	0.215645	NA	-2.57312	0.315967	NA
chrI:131317:+	chrI:131317:+	chrI	131317	131317	+	0.267011	0.811129	0.987504	1.40278	0.200337	0.520158	0.999379	0.359727	0.785564	0.115977	0.92172	NA	0.167757	0.880107	0.969126
chrI:131537:+	chrI:131537:+	chrI	131537	131537	+	-0.561395	0.791553	NA	1.73148	0.375554	NA	0.229275	0.910543	NA	0.307072	0.883387	NA	0.608279	0.757407	NA
chrI:131572:+	chrI:131572:+	chrI	131572	131572	+	1.48301	0.524534	NA	3.05051	0.180059	NA	2.11451	0.357725	NA	1.26981	0.601419	NA	1.56678	0.49753	NA
chrI:131783:+	chrI:131783:+	chrI	131783	131783	+	-0.0961929	0.952981	0.996134	0.992426	0.536706	NA	-0.893488	0.606414	NA	-0.353783	0.837531	NA	-0.39749	0.808481	0.9484
chrI:131847-131867:+	chrI:131847:+	chrI	131847	131867	+	0.995947	0.0988469	0.486424	1.18656	0.051595	0.250259	0.955867	0.114738	0.477643	0.157483	0.802624	0.951152	0.488439	0.421025	0.799834
chrI:132160-132208:+	chrI:132195:+	chrI	132160	132208	+	-0.0821327	0.817441	0.987733	-0.138038	0.702042	0.890704	-0.569398	0.11394	0.47614	0.562011	0.114505	0.491915	0.250203	0.479199	0.840541
chrI:132665:+	chrI:132665:+	chrI	132665	132665	+	0.794602	0.546285	0.953489	0.967205	0.472385	0.768332	0.406358	0.763376	0.955131	0.322084	0.817381	NA	0.829274	0.525944	0.868488
chrI:133017:+	chrI:133017:+	chrI	133017	133017	+	3.4974	0.218301	NA	3.56746	0.214913	NA	3.78455	0.182222	NA	0.225575	0.942507	NA	-0.639523	0.837991	NA
chrI:133332-133410:+	chrI:133356:+	chrI	133332	133410	+	4.92813	1.69e-20	8.95e-18	4.5917	1.01e-17	5.55e-15	4.63513	3.34e-18	1.62e-15	1.24249	0.041286	0.302466	-0.526221	0.434125	0.808959
chrI:133442:+	chrI:133442:+	chrI	133442	133442	+	5.79139	0.00156737	0.0269944	5.26976	0.00458381	0.0501884	4.66182	0.0123113	0.11882	2.52772	0.229028	NA	-0.639515	0.782389	0.948208
chrI:133902:+	chrI:133902:+	chrI	133902	133902	+	3.50652	0.119646	NA	4.86165	0.0287785	NA	4.00833	0.0732601	NA	1.74886	0.492641	NA	-0.639515	0.806149	NA
chrI:135777-135869:+	chrI:135829:+	chrI	135777	135869	+	-0.714425	0.00437195	0.0586009	-0.296583	0.240292	0.569321	-0.458466	0.0670461	0.355184	0.437253	0.0782816	0.414252	-0.0807606	0.743586	0.948208
chrI:135987:+	chrI:135987:+	chrI	135987	135987	+	1.26305	0.24324	0.759682	0.997089	0.37689	0.696535	0.342367	0.763669	0.955201	1.13459	0.310509	NA	1.3171	0.220397	0.599214
chrI:136247:+	chrI:136247:+	chrI	136247	136247	+	-4.0572	0.107621	NA	-0.908301	0.69367	NA	-0.826613	0.710847	NA	-0.0887456	0.967896	NA	-0.58854	0.786631	NA
chrI:136473-136477:+	chrI:136477:+	chrI	136473	136477	+	0.110345	0.924117	0.994146	0.147771	0.901693	0.969241	0.34637	0.764639	0.955273	-1.08474	0.411131	NA	-0.214277	0.854059	0.9624
chrI:136526:+	chrI:136526:+	chrI	136526	136526	+	0.398243	0.822633	NA	0.246448	0.894586	NA	0.715586	0.685734	NA	0.260576	0.888295	NA	0.470971	0.788897	NA
chrI:136561:+	chrI:136561:+	chrI	136561	136561	+	0.666105	0.734933	NA	1.37013	0.486168	NA	1.86656	0.325956	NA	-2.10817	0.365696	NA	1.31209	0.491779	NA
chrI:136613-136614:+	chrI:136613:+	chrI	136613	136614	+	-0.432746	0.62952	0.967891	0.366598	0.681451	0.881322	0.410014	0.639145	0.922582	-0.388324	0.676544	0.909564	-0.117439	0.893661	0.972316
chrI:136717:+	chrI:136717:+	chrI	136717	136717	+	-0.372222	0.850717	NA	-0.0886896	0.964868	NA	-1.4702	0.489671	NA	-1.21027	0.576403	NA	-1.43496	0.486996	NA
chrI:136796-136911:+	chrI:136866:+	chrI	136796	136911	+	-0.142351	0.538574	0.951292	-0.252387	0.278421	0.60954	-0.383431	0.0985674	0.44034	0.0741817	0.749376	0.932969	-0.377289	0.103212	0.381802
chrI:137013:+	chrI:137013:+	chrI	137013	137013	+	2.33127	0.301746	NA	1.8998	0.415631	NA	1.28925	0.582397	NA	2.32103	0.312403	NA	-0.636077	0.805732	NA
chrI:137064:+	chrI:137064:+	chrI	137064	137064	+	-1.57618	0.481977	NA	-1.99882	0.416027	NA	-1.47214	0.514235	NA	0.406565	0.847167	NA	-2.00587	0.379039	NA
chrI:137106:+	chrI:137106:+	chrI	137106	137106	+	-0.483607	0.735373	0.986114	-2.986	0.124383	NA	-0.700438	0.630629	NA	-1.03281	0.500038	NA	-0.684453	0.632557	0.927484
chrI:137142-137146:+	chrI:137146:+	chrI	137142	137146	+	0.222167	0.844154	0.98946	-1.29956	0.320082	0.647451	-0.396709	0.734405	0.946785	0.457127	0.690801	NA	-1.40854	0.24664	0.635061
chrI:137169-137186:+	chrI:137169:+	chrI	137169	137186	+	-0.107376	0.920418	0.993728	-1.60455	0.219105	0.543599	0.142578	0.894229	0.979732	0.514131	0.633426	NA	-0.938334	0.399528	0.787139
chrI:137273-137285:+	chrI:137285:+	chrI	137273	137285	+	0.87384	0.338671	0.849481	0.58229	0.543107	0.810183	0.521182	0.577013	0.901013	0.932719	0.319892	NA	0.502146	0.584964	0.901864
chrI:137417:+	chrI:137417:+	chrI	137417	137417	+	0.0109744	0.996079	NA	-0.483193	0.837824	NA	-0.394137	0.863084	NA	0.211124	0.92602	NA	-0.463553	0.83715	NA
chrI:138533:+	chrI:138533:+	chrI	138533	138533	+	-0.92388	0.614828	NA	-3.66611	0.0987802	NA	-1.7181	0.383592	NA	0.444292	0.803146	NA	-0.253041	0.886412	NA
chrI:138554-138665:+	chrI:138600:+	chrI	138554	138665	+	-0.680508	0.0706272	0.394826	-0.947393	0.0190396	0.132578	0.395109	0.2758	0.714225	0.856209	0.0183145	0.200963	2.52648	4.03e-13	2.48e-11
chrI:139140:+	chrI:139140:+	chrI	139140	139140	+	0.305632	0.604425	0.964942	-0.137402	0.832113	0.946729	0.510634	0.386694	0.806105	0.231335	0.710408	0.91948	3.06112	1.87e-08	5.91e-07
chrI:139219:+	chrI:139219:+	chrI	139219	139219	+	4.15823	0.0682742	NA	3.64543	0.120434	NA	2.19742	0.37015	NA	1.75621	0.499108	NA	3.70032	0.106317	NA
chrI:139395:+	chrI:139395:+	chrI	139395	139395	+	1.52777	0.362308	0.867955	1.34774	0.440321	NA	2.30971	0.161298	NA	0.839019	0.641806	NA	2.60983	0.108724	0.393556
chrI:139418:+	chrI:139418:+	chrI	139418	139418	+	2.21955	0.323374	NA	0.333002	0.897297	NA	2.38234	0.289575	NA	-1.18092	0.650532	NA	2.73148	0.218249	NA
chrI:142045-142054:+	chrI:142049:+	chrI	142045	142054	+	0.0764356	0.943363	0.995529	-0.432844	0.702612	0.891182	-0.44684	0.685901	0.935396	-1.08758	0.359256	NA	-0.978261	0.379124	0.77415
chrI:142109-142226:+	chrI:142141:+	chrI	142109	142226	+	-0.372724	0.023671	0.189455	0.0787687	0.63281	0.858481	-0.236495	0.151207	0.546901	0.256587	0.119433	0.499657	-0.189946	0.248518	0.637273
chrI:142256:+	chrI:142256:+	chrI	142256	142256	+	-0.289752	0.793889	0.987504	-0.827314	0.489015	0.778749	-1.32737	0.26697	0.704463	-1.44863	0.252593	NA	-0.801084	0.476587	0.839146
chrI:142322-142341:+	chrI:142322:+	chrI	142322	142341	+	0.470451	0.477345	0.925859	0.384315	0.575584	0.829073	0.234939	0.727417	0.944848	-0.141537	0.841888	0.961281	-0.165586	0.806021	0.948277
chrI:142365-142386:+	chrI:142367:+	chrI	142365	142386	+	0.486134	0.0929874	0.468787	0.782009	0.0069921	0.0673422	0.514826	0.0754475	0.380262	-0.793695	0.00698102	0.11467	-0.226596	0.434776	0.809418
chrI:142415-142445:+	chrI:142422:+	chrI	142415	142445	+	0.575915	0.615648	0.966091	1.13701	0.32658	0.652628	0.80034	0.484801	0.86356	-0.760332	0.59921	0.879855	4.34922	2.6e-05	0.000446774
chrI:142619-143115:+	chrI:142619:+	chrI	142619	143115	+	-0.187131	0.479779	0.926659	0.282824	0.286059	0.617757	0.115073	0.663748	0.929965	0.181316	0.494262	0.829971	0.109188	0.679549	0.944411
chrI:143140-143153:+	chrI:143140:+	chrI	143140	143153	+	0.53029	0.681998	0.979077	1.21422	0.348596	0.672221	1.67558	0.180894	0.596644	0.822962	0.533114	NA	0.499484	0.697551	0.948208
chrI:143177-143232:+	chrI:143177:+	chrI	143177	143232	+	0.856299	0.278972	0.79962	1.6574	0.0354508	0.201565	2.30036	0.00263078	0.0412765	0.510051	0.541549	0.851827	1.41513	0.0670615	0.284967
chrI:143254-143266:+	chrI:143255:+	chrI	143254	143266	+	0.215094	0.848505	0.98946	1.12717	0.311886	0.641357	1.61306	0.13431	0.516033	0.867294	0.441894	NA	1.07093	0.322128	0.727863
chrI:143426-143442:+	chrI:143426:+	chrI	143426	143442	+	2.15909	0.214584	0.722276	3.07315	0.0750236	0.308973	3.23951	0.0557953	0.31726	2.89269	0.0955831	NA	5.25999	0.00141282	0.0142882
chrI:143533-143587:+	chrI:143548:+	chrI	143533	143587	+	0.780095	0.0182026	0.156715	0.768052	0.0230073	0.150799	0.172722	0.610506	0.914357	-0.205491	0.562766	0.861409	-0.00787372	0.981325	0.994739
chrI:143616-143675:+	chrI:143618:+	chrI	143616	143675	+	0.4327	0.241358	0.757426	0.000499427	0.998966	0.999747	-0.122389	0.746452	0.949023	-0.134618	0.72835	0.924638	0.0463804	0.900598	0.97459
chrI:146305:+	chrI:146305:+	chrI	146305	146305	+	4.0333	0.0720573	NA	3.70459	0.107363	NA	4.52247	0.0427373	NA	1.75069	0.494244	NA	-0.639515	0.807024	NA
chrI:146338-146353:+	chrI:146341:+	chrI	146338	146353	+	5.73316	0.000221742	0.00587705	4.70618	0.00278636	0.0358514	5.50851	0.000398676	0.0099755	2.55534	0.126098	0.511941	-2.0868	0.323244	0.729306
chrI:146389-146400:+	chrI:146400:+	chrI	146389	146400	+	5.91065	0.00361697	0.0511166	3.38073	0.119181	0.396603	4.79006	0.0198574	0.162624	2.84137	0.202966	NA	-0.639518	0.796309	0.948208
chrI:146602:+	chrI:146602:+	chrI	146602	146602	+	4.24746	0.0461197	0.299116	5.00155	0.0187589	NA	4.01007	0.0619122	NA	1.7369	0.48224	NA	-0.639515	0.800398	0.948208
chrI:147418-147434:+	chrI:147434:+	chrI	147418	147434	+	3.55053	0.0371549	0.258831	3.66686	0.0333297	0.193616	3.68634	0.0306566	0.216137	3.86582	0.024189	NA	3.28548	0.0540908	0.24658
chrI:147478:+	chrI:147478:+	chrI	147478	147478	+	2.48474	0.173386	0.657113	2.5419	0.1732	0.482993	3.44289	0.0550706	0.314552	4.30306	0.0159084	NA	2.53477	0.162269	0.503979
chrI:147620:+	chrI:147620:+	chrI	147620	147620	+	3.25197	0.168811	NA	4.20261	0.0735667	NA	3.79095	0.105793	NA	3.3506	0.164299	NA	-0.63952	0.811994	NA
chrI:152163-152252:+	chrI:152215:+	chrI	152163	152252	+	-0.0595928	0.754894	0.986786	-0.105477	0.583716	0.83275	-0.207675	0.278219	0.715531	-0.0380255	0.843248	0.96171	-0.166407	0.383024	0.775756
chrI:152780:+	chrI:152780:+	chrI	152780	152780	+	-0.79362	0.672961	NA	0.262474	0.887112	NA	0.264428	0.884153	NA	-3.51478	0.118771	NA	-1.20308	0.527375	NA
chrI:152861:+	chrI:152861:+	chrI	152861	152861	+	3.34703	0.159788	NA	1.74427	0.515607	NA	3.52016	0.139546	NA	2.88937	0.244339	NA	3.81572	0.104338	NA
chrI:153116:+	chrI:153116:+	chrI	153116	153116	+	0.589726	0.801105	NA	3.33124	0.124141	NA	-0.207359	0.935257	NA	1.93336	0.391852	NA	0.396702	0.865433	NA
chrI:153489:+	chrI:153489:+	chrI	153489	153489	+	-2.28988	0.22255	NA	-0.552969	0.750371	NA	-1.16316	0.50598	NA	-1.17559	0.515494	NA	-1.0847	0.525161	NA
chrI:153545:+	chrI:153545:+	chrI	153545	153545	+	-0.649248	0.655441	0.972976	-1.15259	0.467568	NA	-0.887756	0.551879	NA	0.0194278	0.989356	NA	-1.53698	0.311561	0.715927
chrI:153651-153654:+	chrI:153651:+	chrI	153651	153654	+	4.40119	0.0136238	0.12858	2.80241	0.132597	0.41915	3.36761	0.0630577	0.342627	2.96923	0.108763	NA	-2.05775	0.366398	0.764966
chrI:153690-153736:+	chrI:153715:+	chrI	153690	153736	+	3.31416	1.89e-09	2.54e-07	2.90714	2.44e-07	2.12e-05	3.28705	2.86e-09	3.87e-07	0.748859	0.234048	0.64805	0.323794	0.594217	0.908114
chrI:153772:+	chrI:153772:+	chrI	153772	153772	+	-0.264945	0.875873	0.98995	1.01663	0.536949	NA	1.21131	0.450911	NA	-0.255778	0.885778	NA	0.332155	0.838793	0.957982
chrI:154884-154923:+	chrI:154920:+	chrI	154884	154923	+	-0.408188	0.288013	0.809525	-0.254934	0.514523	0.794477	-0.279622	0.467591	0.856541	-0.000555849	0.998855	0.999337	0.126172	0.73868	0.948208
chrI:154951-154964:+	chrI:154964:+	chrI	154951	154964	+	-0.399774	0.230015	0.743248	-0.943192	0.00836805	0.0764872	-0.357351	0.286402	0.722798	-0.171441	0.614039	0.886867	-0.143898	0.660954	0.938264
chrI:154988:+	chrI:154988:+	chrI	154988	154988	+	-1.36433	0.469607	NA	-0.6581	0.727198	NA	-2.77998	0.211844	NA	-0.247758	0.892882	NA	-1.63609	0.388437	NA
chrI:155783:+	chrI:155783:+	chrI	155783	155783	+	-0.902484	0.603358	0.964942	0.240077	0.886699	NA	0.492786	0.761431	NA	-0.680122	0.706598	NA	0.743174	0.640214	0.930024
chrI:155981:+	chrI:155981:+	chrI	155981	155981	+	0.120741	0.934678	0.994658	-0.0467146	0.975935	NA	-0.275073	0.856426	NA	0.661869	0.655377	NA	-0.200943	0.892151	0.972316
chrI:156037-156038:+	chrI:156038:+	chrI	156037	156038	+	-0.899488	0.382237	0.88339	0.405712	0.68485	0.882722	-0.792056	0.444219	0.843822	-0.0511277	0.960031	NA	-0.0816611	0.933943	0.98337
chrI:156764:+	chrI:156764:+	chrI	156764	156764	+	4.12743	0.122246	NA	2.8142	0.315437	NA	4.00631	0.135207	NA	0.22558	0.939979	NA	-0.639518	0.830965	NA
chrI:158832-158906:+	chrI:158868:+	chrI	158832	158906	+	-0.495778	0.0394214	0.269162	-0.808522	0.00116374	0.0192971	-0.245616	0.306946	0.743058	0.361727	0.131496	0.519313	-0.000249308	0.999163	0.999862
chrI:159176:+	chrI:159176:+	chrI	159176	159176	+	-0.14442	0.928334	0.994512	0.6006	0.707737	NA	-1.24756	0.485505	NA	0.414259	0.797842	NA	0.724971	0.636944	0.929062
chrI:160066:+	chrI:160066:+	chrI	160066	160066	+	-1.41308	0.548552	NA	1.14457	0.574646	NA	1.56588	0.427397	NA	2.02109	0.30615	NA	-1.67849	0.475981	NA
chrI:160097-160101:+	chrI:160101:+	chrI	160097	160101	+	0.485728	0.425872	0.908041	1.367	0.0238701	0.154724	1.44785	0.0145137	0.131775	1.25318	0.0391736	0.296752	-0.0690068	0.911664	0.977486
chrI:166205:+	chrI:166205:+	chrI	166205	166205	+	-3.05693	0.3473	NA	-0.948687	0.769631	NA	0.908366	0.760961	NA	-2.38571	0.463267	NA	0.392236	0.895719	NA
chrI:166257-166259:+	chrI:166257:+	chrI	166257	166259	+	0.120595	0.902322	0.993278	-0.619391	0.577369	0.829802	0.769377	0.423378	0.829975	-0.648177	0.559322	NA	2.32334	0.0111513	0.0758494
chrI:166303-166305:+	chrI:166305:+	chrI	166303	166305	+	2.24663	0.124566	0.555737	2.05268	0.170151	0.478288	1.85911	0.209818	0.635504	-2.70013	0.182655	NA	0.175725	0.91058	0.977269
chrI:166446:+	chrI:166446:+	chrI	166446	166446	+	2.00003	0.451303	NA	1.1926	0.66896	NA	2.80461	0.286173	NA	-1.17337	0.691378	NA	-2.03847	0.4904	NA
chrI:169198:+	chrI:169198:+	chrI	169198	169198	+	-0.445634	0.89928	NA	1.66185	0.635761	NA	1.20563	0.731943	NA	0.225579	0.948914	NA	4.36803	0.177506	NA
chrI:169224-169345:+	chrI:169286:+	chrI	169224	169345	+	-0.00974744	0.959099	0.997367	-0.511726	0.0079851	0.0740633	-0.186826	0.327282	0.759658	0.0941948	0.622237	0.890601	-0.238244	0.210193	0.583376
chrI:169853-169866:+	chrI:169866:+	chrI	169853	169866	+	-0.418384	0.568151	0.960285	1.17393	0.095001	0.350494	0.891897	0.201314	0.625199	-0.219547	0.77196	0.941788	0.0896763	0.899236	0.974242
chrI:169984:+	chrI:169984:+	chrI	169984	169984	+	-0.305468	0.836877	0.988614	-1.49081	0.386203	NA	-0.185101	0.901075	NA	0.702392	0.631584	NA	-0.691976	0.644006	0.931629
chrI:170187:+	chrI:170187:+	chrI	170187	170187	+	0.427251	0.823194	NA	-0.590803	0.777734	NA	1.074	0.569866	NA	-3.06713	0.187746	NA	-0.192989	0.920788	NA
chrI:170862:+	chrI:170862:+	chrI	170862	170862	+	4.83029	0.0407801	NA	3.89639	0.108213	NA	3.525	0.144803	NA	0.225575	0.934396	NA	1.94449	0.441221	NA
chrI:171921-171965:+	chrI:171921:+	chrI	171921	171965	+	-0.892388	0.059114	0.352195	-1.28014	0.0121565	0.0985711	0.221047	0.628036	0.919024	0.887563	0.0506391	0.339327	-0.113073	0.803972	0.948208
chrI:171989-172034:+	chrI:172020:+	chrI	171989	172034	+	0.00464296	0.992751	0.999954	-0.422528	0.443494	0.747564	1.03104	0.0374273	0.246042	1.47122	0.0030273	0.0677589	2.03872	2.39e-05	0.000415691
chrI:172152:+	chrI:172152:+	chrI	172152	172152	+	-0.783125	0.639299	0.969574	0.558267	0.727051	NA	0.339071	0.829625	NA	0.510846	0.749779	NA	0.323333	0.834796	0.956526
chrI:172799:+	chrI:172799:+	chrI	172799	172799	+	4.63328	0.0583508	NA	2.59926	0.32382	NA	3.19589	0.204519	NA	3.55031	0.160371	NA	-0.639523	0.820049	NA
chrI:175292-175314:+	chrI:175312:+	chrI	175292	175314	+	-0.286133	0.428979	0.908938	-0.355572	0.34322	0.667198	-0.107906	0.765679	0.955652	-0.646141	0.0903634	0.441828	-0.228128	0.524828	0.867931
chrI:175342-175359:+	chrI:175359:+	chrI	175342	175359	+	0.844774	0.434346	0.910843	-0.0293743	0.979852	0.993179	0.888504	0.413069	0.822958	0.596908	0.593804	NA	0.828611	0.441137	0.813189
chrI:175382-175394:+	chrI:175394:+	chrI	175382	175394	+	-0.68167	0.497434	0.935069	-2.49705	0.0486863	0.240955	-0.353906	0.723226	0.94437	-1.69991	0.134376	NA	-0.499597	0.613917	0.918365
chrI:176322-176354:+	chrI:176322:+	chrI	176322	176354	+	0.478938	0.441354	0.914173	1.53799	0.011946	0.0974153	1.62651	0.00664108	0.0783324	1.9638	0.00110639	0.0335232	-0.605717	0.359177	0.760318
chrI:176383:+	chrI:176383:+	chrI	176383	176383	+	-0.383664	0.800018	0.987504	-1.51553	0.387793	NA	0.22692	0.878893	0.978904	1.0881	0.459698	NA	-2.34297	0.178097	0.531181
chrI:176697:+	chrI:176697:+	chrI	176697	176697	+	0.533562	0.682957	0.979257	0.598181	0.660393	0.871276	1.08522	0.398164	0.813319	2.4248	0.0520246	NA	0.720906	0.57416	0.896111
chrI:179560:+	chrI:179560:+	chrI	179560	179560	+	4.00376	0.202591	NA	3.56167	0.264495	NA	-0.240847	0.943852	NA	1.5869	0.639953	NA	-0.639521	0.851652	NA
chrI:179856:+	chrI:179856:+	chrI	179856	179856	+	-2.12495	0.303525	NA	-1.42741	0.489711	NA	-0.514275	0.785694	NA	-3.8113	0.0959814	NA	-0.129176	0.944188	NA
chrI:179896:+	chrI:179896:+	chrI	179896	179896	+	-0.408412	0.863523	NA	-2.056	0.424123	NA	0.882051	0.694905	NA	1.23813	0.583806	NA	2.28214	0.291822	NA
chrI:180201-180269:+	chrI:180245:+	chrI	180201	180269	+	-0.272387	0.510543	0.939066	-0.356964	0.417393	0.727341	0.179264	0.6604	0.929212	0.144933	0.730813	0.925719	3.54725	5.44e-21	8.67e-19
chrI:180400-180420:+	chrI:180400:+	chrI	180400	180420	+	0.653496	0.618964	0.966091	0.358357	0.7968	0.93354	0.725046	0.583269	0.903268	-1.95212	0.284754	NA	2.31724	0.0647598	0.278865
chrI:181353-181379:+	chrI:181353:+	chrI	181353	181379	+	-2.79637	0.198635	0.698035	0.417088	0.827036	0.944442	-0.145656	0.939553	0.987995	-0.732679	0.73037	NA	4.42603	0.00690602	0.052035
chrI:181410-181446:+	chrI:181430:+	chrI	181410	181446	+	-0.455902	0.597211	0.964246	-0.21985	0.807737	0.937372	0.452772	0.580632	0.902449	-0.967484	0.328066	0.730043	3.82019	3.7e-07	9.29e-06
chrI:183245:+	chrI:183245:+	chrI	183245	183245	+	-1.0858	0.669986	NA	0.183131	0.941036	NA	0.801199	0.737641	NA	-2.75562	0.312828	NA	-2.22443	0.411287	NA
chrI:183614-183626:+	chrI:183620:+	chrI	183614	183626	+	-0.134155	0.89594	0.991867	0.559203	0.58578	0.833848	-0.680076	0.522032	0.880353	0.188723	0.856191	NA	-2.5917	0.0330018	0.173967
chrI:183668-183689:+	chrI:183688:+	chrI	183668	183689	+	-0.433684	0.0962545	0.478628	-0.575896	0.030005	0.180799	-0.61815	0.0185391	0.156491	-0.253346	0.335884	0.736364	-0.226318	0.382832	0.775756
chrI:183754-183770:+	chrI:183770:+	chrI	183754	183770	+	-0.886637	0.0541072	0.332622	-1.4274	0.00323735	0.0395997	-1.22177	0.00911542	0.0972737	-0.727281	0.120555	0.501883	-1.27365	0.00595117	0.0464087
chrI:183794-183800:+	chrI:183800:+	chrI	183794	183800	+	-1.18043	0.147629	0.606825	-0.893256	0.285821	0.617504	-0.615259	0.44212	0.842466	-0.89676	0.283279	0.695285	-0.811518	0.306712	0.710928
chrI:184803-184892:+	chrI:184876:+	chrI	184803	184892	+	-0.47733	0.0136333	0.128585	-0.592943	0.00250425	0.0336664	-0.592869	0.00228441	0.0373592	-0.17318	0.37351	0.7657	-0.211373	0.272344	0.668344
chrI:185905-185918:+	chrI:185918:+	chrI	185905	185918	+	0.671135	0.352959	0.860502	-1.07136	0.204123	0.524651	-0.0875529	0.907066	0.981322	0.305685	0.684981	0.912363	-0.773509	0.310288	0.715049
chrI:186290-186327:+	chrI:186312:+	chrI	186290	186327	+	1.60743	0.0195704	0.165106	1.33106	0.0626232	0.279608	1.65102	0.0169958	0.147192	2.00516	0.00389791	0.0817754	-1.80547	0.0419687	0.206425
chrI:186915-186919:+	chrI:186919:+	chrI	186915	186919	+	-0.236519	0.780723	0.987504	-0.932335	0.317534	0.645908	-0.0304062	0.971446	0.995204	-0.333913	0.706546	NA	-1.67938	0.0679681	0.287965
chrI:186941-187006:+	chrI:186954:+	chrI	186941	187006	+	-0.229943	0.367879	0.872093	-0.455104	0.082046	0.323331	-0.463499	0.0722366	0.371453	-0.116141	0.653688	0.90179	-1.3935	1.06e-07	2.99e-06
chrI:187364:+	chrI:187364:+	chrI	187364	187364	+	-0.0266251	0.98518	0.999242	0.0104806	0.99434	NA	-1.49304	0.347932	NA	0.362308	0.802802	NA	-2.38153	0.15538	0.490602
chrI:187396-187410:+	chrI:187402:+	chrI	187396	187410	+	-0.587414	0.213728	0.720544	-0.753824	0.127558	0.410829	-0.617282	0.195814	0.617875	-0.313229	0.515317	0.84084	-1.57614	0.00136808	0.0139329
chrI:188032-188065:+	chrI:188055:+	chrI	188032	188065	+	-0.38978	0.115551	0.534913	-0.658922	0.00930904	0.0821751	-0.471586	0.0581985	0.326129	-0.296096	0.237703	0.650773	-0.356524	0.14863	0.477352
chrI:188091:+	chrI:188091:+	chrI	188091	188091	+	-0.458383	0.797533	0.987504	-0.369724	0.844495	NA	0.13687	0.937336	NA	1.11584	0.510891	NA	1.46069	0.371428	0.769523
chrI:188680:+	chrI:188680:+	chrI	188680	188680	+	1.30122	0.633551	NA	0.361503	0.902667	NA	2.38385	0.372872	NA	-1.17295	0.694025	NA	1.85052	0.49023	NA
chrI:188854-188892:+	chrI:188867:+	chrI	188854	188892	+	-0.837324	0.0748846	0.409267	-0.544749	0.258321	0.588173	-0.372846	0.421657	0.828709	0.940596	0.036809	0.287726	0.0590478	0.895717	0.972612
chrI:188932-188944:+	chrI:188944:+	chrI	188932	188944	+	-2.40193	0.0775638	0.417785	-1.61675	0.229755	0.556318	-1.13402	0.350477	0.778618	1.06712	0.336901	NA	-0.284955	0.800806	0.948208
chrI:190495:+	chrI:190495:+	chrI	190495	190495	+	3.3964	0.177412	NA	4.24612	0.0907869	NA	3.19584	0.208884	NA	2.44433	0.361284	NA	0.874345	0.754593	NA
chrI:191924-191933:+	chrI:191933:+	chrI	191924	191933	+	-1.22261	0.374317	0.877552	-0.119449	0.927519	0.977682	-1.58479	0.288961	0.725183	3.18682	0.00429405	NA	0.470315	0.689151	0.948208
chrI:192530-192619:+	chrI:192583:+	chrI	192530	192619	+	0.316769	0.20556	0.708016	0.335377	0.18329	0.497488	-0.123171	0.624835	0.918383	0.0981112	0.698011	0.917266	-0.35911	0.153219	0.48621
chrI:193323:+	chrI:193323:+	chrI	193323	193323	+	0.729712	0.698926	NA	1.15564	0.544217	NA	-0.697424	0.735599	NA	-0.223235	0.913895	NA	-0.164842	0.932357	NA
chrI:194833-194861:+	chrI:194859:+	chrI	194833	194861	+	6.75823	6.65e-05	0.00220818	5.37867	0.00188626	0.0273517	5.5214	0.00127386	0.0243073	3.58655	0.0510882	NA	-0.639518	0.772971	0.948208
chrI:195178:+	chrI:195178:+	chrI	195178	195178	+	-0.17274	0.827744	0.988315	-0.199544	0.808252	0.937507	-0.481335	0.553446	0.89133	0.0977303	0.903774	0.978775	-0.773905	0.338279	0.743091
chrI:198736-198764:+	chrI:198736:+	chrI	198736	198764	+	-0.454797	0.311592	0.830144	-1.34653	0.00608609	0.0612023	-0.512082	0.258964	0.695198	-0.55068	0.235948	0.649294	0.0291663	0.947316	0.986704
chrI:198785-198794:+	chrI:198793:+	chrI	198785	198794	+	-0.368096	0.621205	0.966091	-0.322476	0.675934	0.878827	-0.366396	0.626014	0.918519	-0.613779	0.434706	0.800124	-0.0407258	0.955555	0.988604
chrI:198818-198837:+	chrI:198837:+	chrI	198818	198837	+	-0.0700324	0.861502	0.98946	-1.35168	0.00238344	0.0326032	-0.354321	0.384661	0.804571	-0.863146	0.04381	0.312163	-0.377721	0.348341	0.752478
chrI:198900-198907:+	chrI:198902:+	chrI	198900	198907	+	-0.0701124	0.894738	0.991867	-0.383583	0.496109	0.78297	-0.134376	0.802311	0.967197	-0.338615	0.545728	0.853971	0.452854	0.380621	0.774628
chrI:198937-198946:+	chrI:198946:+	chrI	198937	198946	+	0.0550109	0.965718	0.997489	0.625542	0.627025	0.856166	-0.834375	0.540642	0.886067	0.771718	0.546102	NA	0.146248	0.908062	0.976699
chrI:199048:+	chrI:199048:+	chrI	199048	199048	+	0.192377	0.909096	0.993278	1.90754	0.238636	NA	-0.869953	0.639413	NA	0.721178	0.671249	NA	0.273303	0.869439	0.966466
chrI:199071:+	chrI:199071:+	chrI	199071	199071	+	-0.716763	0.75987	NA	-1.51991	0.558231	NA	-0.991943	0.68024	NA	1.19356	0.596158	NA	-2.31082	0.369306	NA
chrI:199256:+	chrI:199256:+	chrI	199256	199256	+	-1.21861	0.347296	0.855611	-0.4839	0.708376	0.893921	-1.98819	0.162079	0.566615	0.813524	0.501814	NA	-2.35176	0.0967172	0.365752
chrI:199295:+	chrI:199295:+	chrI	199295	199295	+	-0.207242	0.882331	0.99067	-0.579104	0.698952	NA	-2.03619	0.219325	NA	1.18314	0.386008	NA	-2.52539	0.132103	0.444438
chrI:199341:+	chrI:199341:+	chrI	199341	199341	+	-1.62865	0.477107	NA	-0.360259	0.870564	NA	-3.77271	0.130255	NA	0.840747	0.690608	NA	-2.77151	0.261392	NA
chrI:199373:+	chrI:199373:+	chrI	199373	199373	+	-0.00139543	0.999219	0.999972	1.18411	0.396239	NA	-0.00384082	0.997875	NA	-1.27275	0.452946	NA	0.544327	0.693958	0.948208
chrI:199400:+	chrI:199400:+	chrI	199400	199400	+	1.07837	0.769217	NA	0.257979	0.944365	NA	-0.240836	0.948056	NA	4.62196	0.179577	NA	-0.639509	0.862658	NA
chrI:199435-199447:+	chrI:199435:+	chrI	199435	199447	+	-2.85648	0.0139925	0.130862	-1.53585	0.155034	0.456341	-6.06247	0.000371751	0.00943954	0.979307	0.296595	NA	-2.47146	0.0226566	0.132184
chrI:200618-200647:+	chrI:200628:+	chrI	200618	200647	+	-0.384412	0.386797	0.886028	-0.910706	0.0549595	0.259922	-0.37057	0.407511	0.820099	-1.56866	0.00176085	0.0466453	-0.382271	0.386348	0.778551
chrI:207887:+	chrI:207887:+	chrI	207887	207887	+	0.630728	0.74086	NA	-3.11367	0.182626	NA	0.155663	0.93629	NA	-0.904486	0.672439	NA	-1.56581	0.456293	NA
chrI:208222-208224:+	chrI:208222:+	chrI	208222	208224	+	-1.32142	0.248958	0.765929	-1.75945	0.178212	0.490543	0.304794	0.772154	0.957858	0.908607	0.386051	NA	1.20459	0.236576	0.621495
chrI:227481-227521:+	chrI:227521:+	chrI	227481	227521	+	-0.728391	0.285148	0.806523	-1.8282	0.0454554	0.231684	-0.513991	0.450317	0.847573	1.26828	0.0383611	0.293479	4.02914	1.04e-12	6.07e-11
chrI:227543:+	chrI:227543:+	chrI	227543	227543	+	-0.445631	0.905163	NA	0.257973	0.945013	NA	-0.240841	0.94866	NA	1.58273	0.670164	NA	4.53646	0.191584	NA
chrX:22602:-	chrX:22602:-	chrX	22602	22602	-	1.2645	0.543165	NA	-2.06423	0.401708	NA	-2.56305	0.297776	NA	0.352853	0.874847	NA	2.57095	0.204276	NA
chrX:22705-22764:-	chrX:22745:-	chrX	22705	22764	-	-0.851294	0.0485036	0.309673	-1.36756	0.00490675	0.052673	-0.473105	0.267244	0.704508	-0.572103	0.198647	0.609408	2.26096	6.78e-09	2.33e-07
chrX:22794:-	chrX:22794:-	chrX	22794	22794	-	-1.9425	0.43405	NA	-2.72548	0.277577	NA	-0.786384	0.73178	NA	-0.304068	0.894528	NA	1.23724	0.556034	NA
chrX:25059:-	chrX:25059:-	chrX	25059	25059	-	-2.18284	0.297074	NA	-0.697115	0.724784	NA	-0.302318	0.873791	NA	-3.86765	0.0947356	NA	-0.694292	0.715299	NA
chrX:26093-26117:-	chrX:26104:-	chrX	26093	26117	-	1.02861	0.177108	0.6641	1.36698	0.0763935	0.311412	-0.0725082	0.928536	0.985286	2.84089	0.000135333	0.0076907	-2.96549	0.00718396	0.0536274
chrX:26220-26224:-	chrX:26220:-	chrX	26220	26224	-	1.22906	0.302644	0.822844	0.483854	0.70645	0.893318	-0.221845	0.865128	0.976774	2.46469	0.0359159	NA	1.12602	0.343686	0.748864
chrX:26245:-	chrX:26245:-	chrX	26245	26245	-	0.175373	0.919535	0.993622	-0.258607	0.88876	NA	0.342642	0.843741	NA	0.02796	0.987674	NA	0.320188	0.851973	0.961973
chrX:26274:-	chrX:26274:-	chrX	26274	26274	-	-0.892269	0.56552	0.959389	-1.30366	0.451406	NA	0.437207	0.764901	NA	-1.42397	0.415592	NA	1.2259	0.387055	0.77907
chrX:28313-28374:-	chrX:28338:-	chrX	28313	28374	-	-0.252606	0.606712	0.965043	-0.736545	0.158971	0.462388	-0.37495	0.450791	0.848024	-1.13194	0.0356338	0.284018	-1.24875	0.0143087	0.0923604
chrX:28873-28882:-	chrX:28873:-	chrX	28873	28882	-	-0.751838	0.549104	0.954247	-0.76075	0.56145	0.820877	-0.319343	0.79705	0.965983	-2.45207	0.120045	NA	-0.756336	0.543292	0.878808
chrX:29421:-	chrX:29421:-	chrX	29421	29421	-	0.598871	0.690077	0.980667	-0.808649	0.643586	NA	0.692521	0.646081	NA	0.950023	0.532699	NA	-1.7075	0.328572	0.73464
chrX:30713:-	chrX:30713:-	chrX	30713	30713	-	-2.42116	0.262821	0.78215	-3.19016	0.145434	NA	-1.24238	0.521611	NA	-0.962499	0.625997	NA	2.24818	0.178406	0.531274
chrX:31422:-	chrX:31422:-	chrX	31422	31422	-	-0.683413	0.640876	0.970124	-0.238406	0.87313	NA	-1.1976	0.441196	NA	0.637088	0.652094	NA	-0.390727	0.783732	0.948208
chrX:33431-33435:-	chrX:33431:-	chrX	33431	33435	-	3.12852	0.0335992	0.242066	0.892119	0.592614	0.837658	2.7385	0.065724	0.350822	2.34706	0.124108	NA	0.732257	0.643206	0.931338
chrX:33969-33970:-	chrX:33970:-	chrX	33969	33970	-	1.16595	0.392896	0.888719	2.67003	0.0448346	0.229513	1.8954	0.157346	0.557837	0.919223	0.521205	NA	1.91922	0.147965	0.476016
chrX:34237:-	chrX:34237:-	chrX	34237	34237	-	-0.537158	0.690184	0.980667	-0.406852	0.768992	NA	-2.05166	0.176009	NA	-2.1774	0.180641	NA	-1.15244	0.401675	0.78844
chrX:36199:-	chrX:36199:-	chrX	36199	36199	-	0.977891	0.442069	0.914553	-0.226945	0.870423	0.960156	0.467512	0.719273	0.943308	-0.323593	0.817059	NA	-1.51057	0.293535	0.696218
chrX:36249-36364:-	chrX:36275:-	chrX	36249	36364	-	0.68696	0.00914881	0.0984579	0.882202	0.000867273	0.0155837	0.600307	0.0231022	0.179807	-0.0408724	0.879157	0.972863	0.509887	0.0530239	0.243277
chrX:36493:-	chrX:36493:-	chrX	36493	36493	-	-0.445623	0.890314	NA	0.257983	0.936366	NA	-0.240832	0.940589	NA	1.82722	0.565521	NA	5.19814	0.0739177	NA
chrX:40789:-	chrX:40789:-	chrX	40789	40789	-	-0.149867	0.938867	NA	0.370224	0.850837	NA	-0.253582	0.898059	NA	-1.84432	0.421981	NA	-0.174738	0.928323	NA
chrX:41183-41278:-	chrX:41241:-	chrX	41183	41278	-	0.116732	0.620363	0.966091	0.166983	0.480596	0.774131	0.148613	0.52869	0.882561	-0.223979	0.345948	0.74577	0.189335	0.421127	0.799932
chrX:41823:-	chrX:41823:-	chrX	41823	41823	-	-1.03249	0.548811	0.95412	0.0670072	0.968266	NA	-0.200999	0.903967	NA	-0.54262	0.755699	NA	-0.585277	0.725284	0.948208
chrX:41944:-	chrX:41944:-	chrX	41944	41944	-	4.00281	0.0998658	NA	3.4028	0.175149	NA	3.52502	0.152605	NA	2.67982	0.300451	NA	-0.63952	0.818175	NA
chrX:42850:-	chrX:42850:-	chrX	42850	42850	-	4.37639	0.0561043	NA	2.70222	0.273466	NA	4.52512	0.0484034	NA	1.60487	0.542054	NA	-0.639514	0.810709	NA
chrX:43613:-	chrX:43613:-	chrX	43613	43613	-	6.64203	0.000237046	0.00621233	4.64859	0.0128797	0.102136	4.37239	0.0186463	0.156948	0.225591	0.921973	NA	-0.639508	0.781269	0.948208
chrX:43667-43671:-	chrX:43671:-	chrX	43667	43671	-	6.99	2.41e-05	0.000958811	5.58872	0.00092608	0.0163443	5.52436	0.00098304	0.0198672	3.19996	0.0834695	NA	0.81221	0.705562	0.948208
chrX:43775:-	chrX:43775:-	chrX	43775	43775	-	1.55944	0.385414	NA	0.18132	0.928344	NA	1.07854	0.557732	NA	1.91761	0.290774	NA	-0.0948669	0.960574	NA
chrX:47407-47481:-	chrX:47465:-	chrX	47407	47481	-	0.359102	0.0835611	0.438191	0.192824	0.35764	0.67961	0.084236	0.68622	0.935537	0.291811	0.163259	0.566784	-0.211613	0.309681	0.714242
chrX:48557:-	chrX:48557:-	chrX	48557	48557	-	4.0969	0.110429	NA	4.00164	0.123989	NA	2.19673	0.418972	NA	1.79002	0.529641	NA	-0.639519	0.825613	NA
chrX:48718-48722:-	chrX:48722:-	chrX	48718	48722	-	5.52103	0.00562752	0.0700425	3.70305	0.0776977	NA	4.65844	0.0210172	NA	1.7227	0.470008	NA	-0.639513	0.793471	0.948208
chrX:48843:-	chrX:48843:-	chrX	48843	48843	-	3.55714	0.0695035	0.391013	2.87656	0.153114	NA	2.59549	0.194648	NA	0.202694	0.931609	NA	-0.641607	0.787265	0.948208
chrX:48916:-	chrX:48916:-	chrX	48916	48916	-	3.96963	0.119758	NA	3.24977	0.217929	NA	3.78465	0.140447	NA	0.225584	0.937683	NA	-0.639514	0.824594	NA
chrX:49435:-	chrX:49435:-	chrX	49435	49435	-	4.00298	0.110905	NA	4.00179	0.115636	NA	3.20487	0.210986	NA	0.225584	0.936927	NA	-0.639514	0.822497	NA
chrX:49917-49968:-	chrX:49927:-	chrX	49917	49968	-	0.37047	0.523066	0.945465	-0.067785	0.91161	0.972885	0.0184533	0.975138	0.995453	-0.364757	0.557474	0.858875	-1.02789	0.0936505	0.358621
chrX:50018-50034:-	chrX:50034:-	chrX	50018	50034	-	-0.66313	0.473425	0.924682	-1.80645	0.0858148	0.331496	-1.0835	0.255404	0.691621	-0.579607	0.542462	NA	-1.09517	0.241221	0.628775
chrX:50085-50094:-	chrX:50085:-	chrX	50085	50094	-	-0.205151	0.739994	0.986353	-0.464502	0.480122	0.773844	-0.331957	0.597751	0.909281	-0.112328	0.860564	0.96826	0.238062	0.692841	0.948208
chrX:50118:-	chrX:50118:-	chrX	50118	50118	-	-0.734541	0.618734	0.966091	-1.97372	0.29815	0.629867	0.093202	0.947336	0.989517	0.573009	0.684643	NA	1.94807	0.137122	0.454779
chrX:50253-50275:-	chrX:50268:-	chrX	50253	50275	-	-0.421651	0.504974	0.937593	-0.0971348	0.880579	0.962842	0.0913631	0.88344	0.979732	0.0645386	0.919596	0.979426	-0.68494	0.280683	0.680127
chrX:50302-50355:-	chrX:50347:-	chrX	50302	50355	-	0.090075	0.777459	0.987504	0.0560073	0.8637	0.957599	0.368503	0.246663	0.681661	0.188455	0.561375	0.861143	-0.323405	0.31315	0.718065
chrX:50409-50411:-	chrX:50409:-	chrX	50409	50411	-	-0.14455	0.81782	0.987894	-0.461177	0.486769	0.778212	-0.353762	0.579928	0.901881	-0.546033	0.412304	0.789027	-0.375264	0.550502	0.882793
chrX:50443-50503:-	chrX:50452:-	chrX	50443	50503	-	0.034829	0.87977	0.990561	0.196583	0.395443	0.711747	0.405811	0.0776535	0.385908	-0.0291924	0.899825	0.977042	-0.4508	0.0507977	0.235983
chrX:50583-50622:-	chrX:50590:-	chrX	50583	50622	-	3.5198	6.56e-08	6.27e-06	2.93035	1.14e-05	0.000551351	2.87478	1.35e-05	0.000680898	2.2793	0.000837413	0.0283421	-0.375675	0.628073	0.925407
chrX:50676:-	chrX:50676:-	chrX	50676	50676	-	4.27168	0.0640595	NA	3.76393	0.111871	NA	3.52259	0.133865	NA	3.41353	0.154008	NA	-0.639521	0.811451	NA
chrX:51193-51240:-	chrX:51204:-	chrX	51193	51240	-	8.44297	4.03e-09	5.03e-07	6.24038	1.57e-05	0.000713371	6.79658	2.33e-06	0.000157384	3.98932	0.00724351	0.117433	0.336741	0.848439	0.96124
chrX:52009:-	chrX:52009:-	chrX	52009	52009	-	1.20872	0.512131	0.940357	1.5899	0.39386	NA	1.64925	0.367745	NA	0.640385	0.743211	NA	0.550698	0.769052	0.948208
chrX:53150-53209:-	chrX:53186:-	chrX	53150	53209	-	0.154609	0.53025	0.948595	0.24572	0.326739	0.652845	-0.0115217	0.963041	0.992684	-0.214523	0.399976	0.78071	-0.09744	0.692876	0.948208
chrX:54048-54051:-	chrX:54051:-	chrX	54048	54051	-	1.20911	0.455373	0.918204	0.770506	0.657637	0.870326	0.765124	0.648145	0.925651	-0.736242	0.716237	NA	4.11061	0.00709179	0.0530736
chrX:54083-54109:-	chrX:54083:-	chrX	54083	54109	-	3.81681	0.0177323	0.153879	2.90545	0.0834327	0.326253	2.77601	0.0936088	0.428604	2.97482	0.0751034	0.406116	6.06057	0.000127184	0.00180405
chrX:54141-54149:-	chrX:54141:-	chrX	54141	54149	-	0.445897	0.607277	0.965044	-0.539122	0.609026	0.847628	0.667209	0.441311	0.842421	-0.551946	0.598259	0.879176	4.58534	3.12e-09	1.12e-07
chrX:55719-55738:-	chrX:55738:-	chrX	55719	55738	-	3.82161	0.0250206	0.196559	4.62055	0.00667056	0.0652258	3.86799	0.0236068	0.182566	2.83603	0.109764	NA	-2.06119	0.35075	0.753708
chrX:55865-55896:-	chrX:55865:-	chrX	55865	55896	-	6.74754	5.56e-06	0.000288161	6.13022	4.01e-05	0.00148136	5.94228	6.68e-05	0.00245704	2.48737	0.124557	0.509683	-0.64075	0.752309	0.948208
chrX:56926-56935:-	chrX:56935:-	chrX	56926	56935	-	5.19245	0.00197322	0.0324664	2.86443	0.104894	0.370048	4.36537	0.00984474	0.102392	1.33032	0.491715	NA	0.310249	0.874536	0.967374
chrX:57167:-	chrX:57167:-	chrX	57167	57167	-	-0.0780868	0.935142	0.994792	1.17284	0.210289	0.532748	0.935596	0.313095	0.748217	-0.233207	0.81824	NA	-0.00163419	0.998623	0.999862
chrX:57320-57329:-	chrX:57329:-	chrX	57320	57329	-	4.61396	0.000448874	0.0102707	2.01371	0.155178	0.456609	3.15983	0.0183823	0.155627	2.56536	0.0630766	NA	-3.07414	0.113755	0.404307
chrX:57350-57379:-	chrX:57361:-	chrX	57350	57379	-	5.99633	2.16e-13	5.12e-11	4.93893	2.23e-09	3.18e-07	4.93093	2.01e-09	2.88e-07	3.06849	0.000343563	0.0152867	-1.64299	0.207926	0.579818
chrX:57642-57650:-	chrX:57642:-	chrX	57642	57650	-	5.41335	0.00563848	0.0701256	3.96123	0.0521676	NA	4.525	0.0225336	NA	3.19211	0.130303	NA	-0.639516	0.790729	0.948208
chrX:58078-58082:-	chrX:58082:-	chrX	58078	58082	-	1.09174	0.0731674	0.403585	1.47686	0.0163319	0.11984	1.40858	0.0204134	0.1656	-0.469746	0.495568	0.830197	-2.73548	0.000990292	0.0106537
chrX:58341:-	chrX:58341:-	chrX	58341	58341	-	0.982417	0.554123	NA	0.266843	0.88143	NA	0.212026	0.902774	NA	1.28257	0.44655	NA	-2.15081	0.304704	NA
chrX:58417:-	chrX:58417:-	chrX	58417	58417	-	0.35326	0.786598	0.987504	0.270678	0.84147	NA	0.178342	0.892928	0.979732	-0.42632	0.763738	NA	-1.77197	0.23239	0.616389
chrX:58567:-	chrX:58567:-	chrX	58567	58567	-	0.770109	0.652767	0.972468	1.01458	0.560948	NA	1.20824	0.476725	NA	-0.493196	0.800039	NA	0.0476102	0.97831	NA
chrX:58597:-	chrX:58597:-	chrX	58597	58597	-	0.514716	0.764168	NA	1.79072	0.287127	NA	0.130924	0.940885	NA	-1.34422	0.521383	NA	-2.22902	0.293028	NA
chrX:58814-58882:-	chrX:58836:-	chrX	58814	58882	-	0.0343088	0.88629	0.990954	0.231364	0.338437	0.663476	0.000376964	0.99875	0.999785	0.429819	0.0744042	0.405195	0.0143252	0.952297	0.988521
chrX:58908-58982:-	chrX:58924:-	chrX	58908	58982	-	0.26507	0.385576	0.885216	0.540045	0.08218	0.323612	0.306232	0.318934	0.753045	0.0752375	0.812874	0.954026	2.16645	1.62e-13	1.04e-11
chrX:59183:-	chrX:59183:-	chrX	59183	59183	-	-1.94981	0.140617	0.592195	-0.846826	0.500695	0.78576	-0.987041	0.414712	0.823769	-0.771004	0.534642	NA	2.55946	0.0135971	0.0887554
chrX:60127-60187:-	chrX:60168:-	chrX	60127	60187	-	-0.346092	0.316584	0.834819	-0.00694064	0.984182	0.994867	-0.236779	0.494509	0.867874	0.614195	0.0732808	0.402309	-0.0834706	0.806805	0.948277
chrX:60517:-	chrX:60517:-	chrX	60517	60517	-	0.755647	0.645662	0.970718	-1.3897	0.507161	NA	0.456432	0.785877	NA	1.55422	0.342384	NA	-0.63665	0.716822	NA
chrX:60539-60559:-	chrX:60557:-	chrX	60539	60559	-	0.182763	0.809765	0.987504	0.545208	0.479818	0.773571	-0.314975	0.689322	0.936432	0.813492	0.285132	0.696327	0.0943692	0.900667	0.97459
chrX:63526-63566:-	chrX:63553:-	chrX	63526	63566	-	1.22522	0.0097197	0.102296	0.371358	0.466656	0.764924	1.57612	0.000838338	0.0176521	0.262964	0.608357	0.883105	4.06067	5.81e-19	7.46e-17
chrX:63591-63622:-	chrX:63591:-	chrX	63591	63622	-	0.665329	0.257456	0.776039	-0.524037	0.430896	0.737538	0.770883	0.191066	0.610984	-0.604007	0.366203	0.759315	3.38198	1.58e-09	5.94e-08
chrX:68777-68854:-	chrX:68805:-	chrX	68777	68854	-	-0.382857	0.0480274	0.307457	-0.703589	0.000338348	0.00786966	-0.423517	0.0291216	0.209413	0.295725	0.126807	0.512449	-0.283835	0.141754	0.464686
chrX:68910-68925:-	chrX:68925:-	chrX	68910	68925	-	-0.969019	0.328443	0.842294	-2.52055	0.0411803	0.218574	-0.714419	0.470043	0.857749	-0.532953	0.595937	NA	-0.802031	0.411025	0.794122
chrX:68976-68978:-	chrX:68976:-	chrX	68976	68978	-	-0.688859	0.501372	0.936256	-2.18612	0.0838587	0.327115	0.0741571	0.940893	0.988064	0.0338343	0.973609	NA	-0.576157	0.568514	0.892883
chrX:71160-71202:-	chrX:71202:-	chrX	71160	71202	-	0.733559	0.450978	0.917282	-0.455948	0.692227	0.885707	0.371186	0.712478	0.941537	0.426893	0.681579	0.911707	3.80751	2.65e-05	0.00045278
chrX:72642-72680:-	chrX:72652:-	chrX	72642	72680	-	1.41777	0.078308	0.420534	0.779671	0.354658	0.677042	0.954197	0.244333	0.678729	-2.08811	0.0687829	0.392948	-0.378411	0.657776	0.937241
chrX:72706:-	chrX:72706:-	chrX	72706	72706	-	0.553488	0.752553	NA	-3.19046	0.149632	NA	0.756518	0.666495	NA	-1.8383	0.396349	NA	-0.638663	0.726829	NA
chrX:72732-72755:-	chrX:72744:-	chrX	72732	72755	-	0.960117	0.0349783	0.24845	0.711696	0.130499	0.415734	1.31092	0.00385721	0.0537152	-0.797782	0.127244	0.512648	-0.404726	0.394992	0.784759
chrX:72846:-	chrX:72846:-	chrX	72846	72846	-	0.901851	0.590294	NA	0.684133	0.694897	NA	0.129203	0.941135	NA	0.120829	0.946704	NA	0.153819	0.928407	NA
chrX:72932:-	chrX:72932:-	chrX	72932	72932	-	-1.26388	0.360895	0.86733	-0.348909	0.79796	NA	-0.592545	0.658704	NA	-0.929903	0.513222	NA	-2.25103	0.130285	0.440692
chrX:72995-73016:-	chrX:73004:-	chrX	72995	73016	-	-0.994014	0.125072	0.556548	-2.17383	0.00462516	0.050491	-0.276177	0.662729	0.929689	-0.775756	0.244258	0.656404	-0.395115	0.528753	0.870021
chrX:73366:-	chrX:73366:-	chrX	73366	73366	-	-1.52429	0.499707	NA	0.149861	0.941608	NA	0.64827	0.73494	NA	1.81309	0.330508	NA	1.62329	0.374987	NA
chrX:73417-73484:-	chrX:73453:-	chrX	73417	73484	-	-0.269816	0.108272	0.514988	-0.18406	0.276946	0.608527	-0.0660241	0.694309	0.938477	0.370917	0.0273565	0.2478	-0.275435	0.100543	0.375139
chrX:74854:-	chrX:74854:-	chrX	74854	74854	-	-0.0383947	0.982764	0.998839	-0.212166	0.911054	NA	1.79661	0.282439	NA	0.339737	0.85125	NA	1.131	0.501444	0.854872
chrX:74958-75415:-	chrX:75324:-	chrX	74958	75415	-	-0.340144	0.127495	0.561982	-0.00239913	0.991427	0.997051	-0.0397954	0.858468	0.975968	0.0851462	0.70291	0.91861	-0.370177	0.0971471	0.366856
chrX:75786-75790:-	chrX:75790:-	chrX	75786	75790	-	0.0112893	0.988338	0.999659	-0.565075	0.505861	0.78904	0.0389403	0.960164	0.992147	-0.602298	0.478393	0.822516	1.63902	0.0248733	0.141657
chrX:76670:-	chrX:76670:-	chrX	76670	76670	-	-1.44852	0.276635	0.797246	0.543968	0.654085	0.868762	-0.277959	0.821929	0.970862	-0.448658	0.72852	NA	0.69119	0.554407	0.88538
chrX:77319:-	chrX:77319:-	chrX	77319	77319	-	-0.132207	0.912661	0.993278	0.727488	0.543475	0.810376	0.407023	0.732099	0.945882	-0.484146	0.706043	NA	-0.199821	0.867647	0.96603
chrX:79282-79356:-	chrX:79355:-	chrX	79282	79356	-	0.487723	0.209709	0.714958	0.412958	0.293222	0.624919	0.185935	0.63456	0.92077	0.121113	0.75914	0.936622	-0.64342	0.102517	0.380378
chrX:79380-79421:-	chrX:79421:-	chrX	79380	79421	-	0.0667076	0.914871	0.993278	-0.112707	0.862766	0.957241	-0.397051	0.537291	0.884701	0.401735	0.525886	0.844696	-0.289471	0.644943	0.931971
chrX:79457:-	chrX:79457:-	chrX	79457	79457	-	-0.373465	0.843096	NA	-3.11572	0.168567	NA	-0.174524	0.926313	NA	-1.7652	0.425998	NA	1.02763	0.56645	NA
chrX:79867-79882:-	chrX:79867:-	chrX	79867	79882	-	-0.145866	0.763729	0.987276	-0.929461	0.0960314	0.352316	-0.096767	0.843505	0.974226	-0.562284	0.290435	0.700712	3.38666	2.08e-14	1.54e-12
chrX:79906-79918:-	chrX:79906:-	chrX	79906	79918	-	0.961016	0.333884	0.846441	-0.241276	0.836686	0.948598	-0.151875	0.889576	0.979732	0.0137165	0.990302	0.997382	4.0398	1.39e-05	0.000255794
chrX:79939:-	chrX:79939:-	chrX	79939	79939	-	2.0019	0.567506	NA	0.257971	0.94361	NA	-0.240844	0.947348	NA	0.225578	0.950681	NA	4.25902	0.207391	NA
chrX:79967-79997:-	chrX:79983:-	chrX	79967	79997	-	0.0169328	0.979807	0.998767	-0.519815	0.471198	0.7675	-0.810472	0.253319	0.688928	-0.508457	0.479511	0.82286	1.6388	0.0104156	0.0718412
chrX:82477-82493:-	chrX:82493:-	chrX	82477	82493	-	-0.613819	0.357447	0.864329	-1.19021	0.105091	0.370435	-0.172165	0.794005	0.964992	-0.545914	0.43064	0.798746	0.324893	0.611444	0.917683
chrX:82516-82520:-	chrX:82520:-	chrX	82516	82520	-	-0.956496	0.239849	0.756009	-0.958237	0.269162	0.599857	0.0255697	0.973725	0.995204	-0.0723989	0.928086	0.981449	0.786502	0.291952	0.693985
chrX:82607-82614:-	chrX:82607:-	chrX	82607	82614	-	-0.347336	0.726696	0.985298	-1.12108	0.303374	0.634481	-1.55612	0.150749	0.546515	-1.11374	0.304994	NA	-0.570182	0.566647	0.891884
chrX:83004-83039:-	chrX:83039:-	chrX	83004	83039	-	-0.459854	0.188539	0.682375	-0.52988	0.142898	0.436206	-0.969667	0.0071443	0.0818768	0.310649	0.373175	0.7657	-1.5546	1.98e-05	0.000350517
chrX:83201:-	chrX:83201:-	chrX	83201	83201	-	-2.30262	0.430234	NA	0.150814	0.955047	NA	-1.0701	0.697261	NA	-0.577092	0.833784	NA	-3.90583	0.182983	NA
chrX:83774-83821:-	chrX:83810:-	chrX	83774	83821	-	0.852192	0.178513	0.665669	0.90358	0.170279	0.478419	0.691436	0.284747	0.720871	1.12199	0.0834008	0.426241	3.63405	8.51e-10	3.32e-08
chrX:85298-85302:-	chrX:85298:-	chrX	85298	85302	-	-0.445615	0.876676	NA	1.66895	0.558936	NA	-0.240824	0.933163	NA	0.225599	0.937379	NA	5.80376	0.0200605	NA
chrX:87614:-	chrX:87614:-	chrX	87614	87614	-	3.67072	0.0537971	0.331578	2.18102	0.278069	NA	3.31395	0.0840133	NA	-1.24729	0.597697	NA	1.26547	0.529498	0.870128
chrX:87642:-	chrX:87642:-	chrX	87642	87642	-	3.41402	0.0681862	0.385788	2.78251	0.149044	NA	2.05671	0.290022	NA	2.57724	0.184198	NA	1.33607	0.497774	0.852172
chrX:87671-87683:-	chrX:87683:-	chrX	87671	87683	-	2.77801	8.96e-05	0.0028384	1.54554	0.0380135	0.209002	2.63532	0.000217369	0.00619721	1.15013	0.129532	0.516089	-0.207989	0.790318	0.948208
chrX:87720-87726:-	chrX:87726:-	chrX	87720	87726	-	2.85239	0.00271517	0.0411602	2.63047	0.0067506	0.0658863	2.88529	0.00249257	0.0398348	0.127697	0.910858	0.979426	-0.670768	0.553835	0.885043
chrX:88039:-	chrX:88039:-	chrX	88039	88039	-	1.13587	0.554819	NA	2.16075	0.256406	NA	0.450951	0.822006	NA	1.7268	0.37098	NA	-0.530641	0.799491	NA
chrX:88516:-	chrX:88516:-	chrX	88516	88516	-	-0.926594	0.617625	NA	-1.22533	0.538335	NA	-2.72626	0.222828	NA	-0.584299	0.757569	NA	-0.279637	0.876101	NA
chrX:88552-88632:-	chrX:88575:-	chrX	88552	88632	-	-0.159719	0.398709	0.893194	-0.596091	0.00192462	0.0276778	-0.287993	0.129335	0.506566	-0.132337	0.487734	0.827749	-0.551884	0.00361131	0.0311395
chrX:89014:-	chrX:89014:-	chrX	89014	89014	-	-0.445619	0.85772	0.98946	2.70054	0.233489	NA	2.19812	0.332292	NA	0.225596	0.927683	NA	6.43488	0.0015628	0.0155195
chrX:89689-89704:-	chrX:89689:-	chrX	89689	89704	-	0.304129	0.729997	0.98575	-0.00894613	0.992349	0.99745	0.327258	0.712484	0.941537	-0.572478	0.55755	NA	0.577576	0.505205	0.857355
chrX:89780:-	chrX:89780:-	chrX	89780	89780	-	1.66336	0.367227	0.872026	1.71066	0.364102	NA	1.44667	0.438718	NA	1.13179	0.558628	NA	0.395539	0.83688	NA
chrX:89954:-	chrX:89954:-	chrX	89954	89954	-	1.18788	0.561868	NA	0.684562	0.749496	NA	-1.3673	0.575489	NA	0.935025	0.658523	NA	0.91689	0.655044	NA
chrX:90092-90144:-	chrX:90113:-	chrX	90092	90144	-	-0.238738	0.185917	0.679182	-0.123686	0.494886	0.782302	-0.150594	0.404359	0.817396	0.0180572	0.920535	0.979499	-0.275724	0.126298	0.431877
chrX:90733:-	chrX:90733:-	chrX	90733	90733	-	0.90174	0.53279	0.94911	1.02236	0.489427	NA	0.698008	0.634321	NA	-1.88527	0.330959	NA	0.532374	0.714385	0.948208
chrX:92173:-	chrX:92173:-	chrX	92173	92173	-	2.94355	0.228478	NA	4.10356	0.0891604	NA	3.78471	0.115438	NA	1.76859	0.510112	NA	0.866877	0.748586	NA
chrX:92331:-	chrX:92331:-	chrX	92331	92331	-	2.63633	0.319712	NA	1.64104	0.550185	NA	1.25904	0.645318	NA	-1.29625	0.663338	NA	-0.634192	0.829344	NA
chrX:92378-92386:-	chrX:92378:-	chrX	92378	92386	-	5.16668	0.00218785	0.0351333	4.11702	0.0164749	0.12048	4.36677	0.0101783	0.104501	-1.19605	0.588305	NA	-2.06115	0.350919	0.753858
chrX:92409-92419:-	chrX:92419:-	chrX	92409	92419	-	4.0522	0.0277292	0.211055	3.20686	0.0893744	0.339566	3.64141	0.0495111	0.293815	-1.24303	0.592014	NA	-2.10813	0.363403	0.76311
chrX:92506:-	chrX:92506:-	chrX	92506	92506	-	0.0268393	0.976217	0.998107	0.903832	0.311171	0.640857	0.755309	0.390088	0.808219	0.0877476	0.925341	0.980556	0.495352	0.571126	0.894466
chrX:92550:-	chrX:92550:-	chrX	92550	92550	-	4.77067	0.0709809	NA	2.81372	0.313483	NA	2.78486	0.309942	NA	0.225583	0.939757	NA	-0.639515	0.83035	NA
chrX:92933-92950:-	chrX:92933:-	chrX	92933	92950	-	1.90712	0.185853	0.679124	2.18232	0.134502	0.422028	1.52907	0.29668	0.73333	-0.336564	0.8454	NA	-0.50041	0.755547	0.948208
chrX:93150:-	chrX:93150:-	chrX	93150	93150	-	4.18779	0.0923897	NA	4.67188	0.0612384	NA	2.78121	0.281159	NA	0.225583	0.936607	NA	-0.639515	0.821609	NA
chrX:94516-94604:-	chrX:94593:-	chrX	94516	94604	-	0.223131	0.45988	0.919506	0.158522	0.602879	0.84407	-0.154106	0.612034	0.914684	0.0531217	0.861813	0.968458	-0.0177438	0.953159	0.988604
chrX:94693-94701:-	chrX:94693:-	chrX	94693	94701	-	2.86152	0.0541979	0.332796	2.28139	0.138194	0.428488	1.63817	0.289896	0.72601	2.25399	0.143077	NA	2.05543	0.172327	0.521644
chrX:96308:-	chrX:96308:-	chrX	96308	96308	-	-0.521751	0.778472	NA	0.575653	0.751912	NA	0.676831	0.704296	NA	-1.04339	0.606652	NA	-4.1614	0.0627638	NA
chrX:96487:-	chrX:96487:-	chrX	96487	96487	-	0.487565	0.689494	0.980667	-0.262124	0.841555	0.95044	-0.110314	0.930227	0.985358	-0.722377	0.594847	NA	-0.712858	0.575836	0.89684
chrX:96523-96585:-	chrX:96537:-	chrX	96523	96585	-	-0.178438	0.486346	0.929208	-0.12151	0.636214	0.85983	0.0485564	0.849744	0.974423	-0.00651716	0.979751	0.993678	-0.431389	0.0924456	0.35602
chrX:97446:-	chrX:97446:-	chrX	97446	97446	-	3.29917	0.198141	NA	0.257977	0.928349	NA	2.20185	0.411553	NA	0.225584	0.937326	NA	4.65403	0.0636028	NA
chrX:97494-97518:-	chrX:97502:-	chrX	97494	97518	-	0.0243225	0.971309	0.997489	-0.703226	0.350445	0.673393	-0.603076	0.397398	0.81319	-0.424745	0.560899	0.860877	2.06023	0.00122781	0.0127653
chrX:99398-99486:-	chrX:99434:-	chrX	99398	99486	-	1.27902	0.0291255	0.218936	0.854574	0.178169	0.490543	1.78063	0.00207279	0.0350154	-1.16454	0.169323	0.574279	5.79405	1.58e-26	4.27e-24
chrX:100760-100761:-	chrX:100761:-	chrX	100760	100761	-	-2.01959	0.127352	0.561982	-2.93364	0.0627565	0.280058	-3.36675	0.0310843	0.218229	-0.760647	0.552402	NA	-1.31519	0.297127	0.700675
chrX:100818:-	chrX:100818:-	chrX	100818	100818	-	-1.73018	0.341895	NA	-0.634499	0.720538	NA	-2.07705	0.276485	NA	-1.80092	0.354847	NA	-1.0031	0.561271	NA
chrX:100880-100972:-	chrX:100926:-	chrX	100880	100972	-	-0.0504581	0.844025	0.98946	-0.465983	0.0714746	0.300305	-0.406756	0.113892	0.476084	-0.672123	0.00948599	0.136686	-0.585654	0.0226504	0.132184
chrX:101786-101836:-	chrX:101799:-	chrX	101786	101836	-	-1.10605	2.74e-05	0.00106525	-3.68077	3.22e-29	5.19e-26	0.315741	0.222703	0.653017	-0.6589	0.0130097	0.163292	-0.912193	0.000493625	0.00586666
chrX:101857:-	chrX:101857:-	chrX	101857	101857	-	-1.51453	0.136987	0.581894	-1.51217	0.167779	0.475171	-0.588217	0.542602	0.886571	0.411307	0.662042	NA	-0.602775	0.524382	0.86791
chrX:101887-101893:-	chrX:101887:-	chrX	101887	101893	-	-0.411881	0.550483	0.954694	-0.492586	0.497584	0.783705	0.246584	0.715154	0.942477	0.437471	0.522666	0.843323	-0.148726	0.825822	0.95336
chrX:102864:-	chrX:102864:-	chrX	102864	102864	-	-4.04688	0.0898341	NA	-0.202816	0.921664	NA	-0.399394	0.844211	NA	0.240345	0.905278	NA	-0.327903	0.869589	NA
chrX:104309-104334:-	chrX:104334:-	chrX	104309	104334	-	-5.45467	0.0018132	0.0304141	-0.282265	0.799303	0.934463	-0.106332	0.920557	0.983692	-0.495695	0.659753	NA	0.990012	0.330249	0.736366
chrX:104415-104428:-	chrX:104415:-	chrX	104415	104428	-	-4.53662	0.0306727	0.226819	-1.31215	0.4708	NA	0.277354	0.862284	0.976544	0.680908	0.671098	NA	0.8508	0.58628	0.902994
chrX:104480-104542:-	chrX:104521:-	chrX	104480	104542	-	-4.71384	3.11e-33	5.99e-30	0.215251	0.44382	0.747838	-0.0237459	0.93237	0.985417	0.178195	0.526374	0.845055	0.224654	0.418283	0.798672
chrX:104803:-	chrX:104803:-	chrX	104803	104803	-	-0.447071	0.844074	NA	-2.18765	0.379909	NA	0.759069	0.724697	NA	-0.683991	0.778374	NA	1.77541	0.393138	NA
chrX:106089-106094:-	chrX:106089:-	chrX	106089	106094	-	1.12985	0.199276	0.698959	0.156742	0.869496	0.959757	1.30312	0.139045	0.523518	-0.167804	0.863628	0.968785	1.24111	0.155422	0.490686
chrX:107168-107172:-	chrX:107172:-	chrX	107168	107172	-	2.23508	0.0537144	0.331291	1.25995	0.302288	0.633711	1.50021	0.205536	0.630442	-0.413381	0.767032	NA	-0.144144	0.9088	0.976765
chrX:107205:-	chrX:107205:-	chrX	107205	107205	-	-2.03173	0.358025	NA	-1.2344	0.573815	NA	-0.41709	0.838605	NA	-2.16726	0.35771	NA	-1.59542	0.451801	NA
chrX:107262-107312:-	chrX:107280:-	chrX	107262	107312	-	2.97206	5.2e-06	0.000272349	1.73946	0.0112576	0.0938376	2.44837	0.000208682	0.00597513	-0.138057	0.861772	0.968458	-0.918739	0.242294	0.629619
chrX:109307-109319:-	chrX:109319:-	chrX	109307	109319	-	0.303924	0.750125	0.986786	0.288588	0.768246	0.920717	-0.702578	0.48425	0.863516	0.836509	0.383024	0.770607	-3.18414	0.010957	0.074754
chrX:109395:-	chrX:109395:-	chrX	109395	109395	-	-0.311453	0.884785	NA	0.0315431	0.98844	NA	-3.85164	0.124228	NA	-2.01066	0.41486	NA	-1.80266	0.430857	NA
chrX:109416-109644:-	chrX:109546:-	chrX	109416	109644	-	-0.326055	0.114421	0.531905	-0.145148	0.484063	0.775879	-0.544809	0.00855819	0.0928513	0.1254	0.544505	0.853622	-0.468118	0.0233849	0.135304
chrX:109679-109699:-	chrX:109699:-	chrX	109679	109699	-	1.04445	0.480745	0.927652	1.2908	0.390289	0.707459	0.43443	0.775583	0.958983	0.699012	0.649855	NA	-0.529153	0.736174	0.948208
chrX:109843-109852:-	chrX:109852:-	chrX	109843	109852	-	0.20227	0.764559	0.987276	-0.247171	0.732432	0.904069	0.471147	0.484211	0.863516	-0.601754	0.418372	0.79277	0.562328	0.395992	0.785243
chrX:109987:-	chrX:109987:-	chrX	109987	109987	-	-0.308612	0.847797	0.98946	0.529752	0.740352	NA	0.588491	0.707278	NA	-1.0945	0.538978	NA	-2.12805	0.240545	0.628028
chrX:110224:-	chrX:110224:-	chrX	110224	110224	-	0.702899	0.525445	0.94653	-0.888841	0.476758	0.771079	-0.525997	0.65327	0.927324	-3.2044	0.0623855	NA	-0.554063	0.629562	0.926175
chrX:110980:-	chrX:110980:-	chrX	110980	110980	-	0.017381	0.992665	NA	-0.582041	0.77525	NA	-2.1722	0.343298	NA	1.08867	0.559676	NA	-1.69397	0.414664	NA
chrX:111150:-	chrX:111150:-	chrX	111150	111150	-	-0.483182	0.721838	0.985231	-0.0221301	0.987181	NA	-1.49024	0.318975	NA	0.410402	0.75981	NA	-1.53269	0.288445	0.689118
chrX:111223-111250:-	chrX:111235:-	chrX	111223	111250	-	0.0889345	0.8395	0.98931	0.400899	0.365151	0.686255	-1.3981	0.00258266	0.040617	0.0609543	0.891421	0.975497	-2.38411	7.33e-07	1.73e-05
chrX:111289-111439:-	chrX:111378:-	chrX	111289	111439	-	-0.258501	0.246801	0.76403	-0.480538	0.033229	0.193324	-0.616906	0.00599754	0.0730696	0.0934114	0.676613	0.909564	-1.13712	4.28e-07	1.06e-05
chrX:113044:-	chrX:113044:-	chrX	113044	113044	-	-2.56584	0.261298	NA	0.402961	0.833846	NA	-0.811143	0.68354	NA	0.0885908	0.963689	NA	-2.8353	0.214501	NA
chrX:113341-113425:-	chrX:113413:-	chrX	113341	113425	-	-0.641492	0.0278292	0.211669	-0.703878	0.0191153	0.132926	-1.49911	8.91e-07	6.96e-05	0.34845	0.228389	0.642297	-1.19721	5.03e-05	0.000794859
chrX:115130:-	chrX:115130:-	chrX	115130	115130	-	0.580732	0.669339	0.975919	-0.020569	0.988694	NA	0.538921	0.694387	NA	0.12246	0.932004	NA	-2.27342	0.172573	0.52209
chrX:115169:-	chrX:115169:-	chrX	115169	115169	-	4.29821	0.0748603	NA	3.94913	0.108368	NA	4.00456	0.099463	NA	0.225583	0.935172	NA	-0.639515	0.817632	NA
chrX:115286-115301:-	chrX:115301:-	chrX	115286	115301	-	0.377969	0.595043	0.964007	-0.640905	0.403735	0.716847	-0.503555	0.49568	0.868498	-0.809986	0.296401	0.702672	-0.810992	0.270629	0.666478
chrX:115607-115609:-	chrX:115609:-	chrX	115607	115609	-	-0.339798	0.768466	0.987504	-1.50799	0.26671	0.596868	0.240408	0.832225	0.972751	0.387382	0.736658	NA	0.724499	0.511958	0.860419
chrX:115635-115707:-	chrX:115673:-	chrX	115635	115707	-	-0.437125	0.195816	0.693411	-0.555128	0.10974	0.379718	-0.464126	0.172199	0.58275	0.366182	0.277308	0.690754	0.269068	0.418089	0.798672
chrX:115769:-	chrX:115769:-	chrX	115769	115769	-	-1.08429	0.628342	NA	-2.82513	0.251052	NA	-1.87909	0.444936	NA	-2.85752	0.245659	NA	1.85807	0.358598	NA
chrX:115794-115818:-	chrX:115802:-	chrX	115794	115818	-	1.0069	0.33091	0.844422	0.569912	0.601258	0.843457	-0.405841	0.719039	0.943142	0.148247	0.89477	NA	1.40453	0.168459	0.514642
chrX:116022:-	chrX:116022:-	chrX	116022	116022	-	1.0497	0.434365	0.910843	0.756512	0.590817	0.836297	1.28581	0.337694	0.768929	-0.408394	0.792	NA	1.63901	0.212586	0.587739
chrX:116246:-	chrX:116246:-	chrX	116246	116246	-	-3.97636	0.105544	NA	-3.27275	0.18281	NA	-1.32413	0.5534	NA	-1.92906	0.424627	NA	1.5022	0.456304	NA
chrX:116277-116288:-	chrX:116283:-	chrX	116277	116288	-	-0.112405	0.916937	0.993518	-0.683926	0.571349	0.827215	0.488046	0.643322	0.923875	-0.825982	0.499596	NA	2.09672	0.035182	0.182503
chrX:116412-116515:-	chrX:116471:-	chrX	116412	116515	-	0.267664	0.465949	0.923011	-0.0237297	0.951987	0.985625	-0.178031	0.641894	0.923453	0.200355	0.603328	0.88095	3.93892	4.52e-31	1.83e-28
chrX:116872-116884:-	chrX:116884:-	chrX	116872	116884	-	-1.74599	0.25008	0.767795	-2.11389	0.212537	NA	-3.54155	0.0714177	0.368914	1.02074	0.459978	NA	-2.94388	0.0798477	0.322578
chrX:116906-116952:-	chrX:116942:-	chrX	116906	116952	-	-1.14439	0.00916538	0.0985714	-1.67223	0.000326581	0.00771144	-1.99491	1.46e-05	0.000720255	0.460968	0.283386	0.695285	-2.37607	2.38e-07	6.23e-06
chrX:117016-117094:-	chrX:117084:-	chrX	117016	117094	-	-1.05268	0.0023554	0.0369897	-1.04221	0.00323397	0.0395954	-1.22773	0.00045024	0.010901	-0.349515	0.312516	0.718335	-1.76234	5.4e-07	1.31e-05
chrX:117172-117177:-	chrX:117172:-	chrX	117172	117177	-	-0.649465	0.561179	0.958304	-2.58668	0.0778683	0.314494	-1.71042	0.161395	0.565408	0.783882	0.470474	NA	-3.50714	0.0171929	0.106784
chrX:117227:-	chrX:117227:-	chrX	117227	117227	-	-2.63011	0.0612205	0.360965	-1.48814	0.266013	0.596431	-2.40343	0.0863468	0.410037	-0.00474541	0.99686	NA	-0.515636	0.664447	0.939476
chrX:117648:-	chrX:117648:-	chrX	117648	117648	-	-1.21467	0.317216	0.835102	-1.04119	0.415412	0.725612	-1.21666	0.325338	0.75842	-0.0612221	0.958351	NA	0.915824	0.400526	0.78758
chrX:117700-117730:-	chrX:117700:-	chrX	117700	117730	-	0.300057	0.685718	0.979559	0.616581	0.417094	0.727264	0.919284	0.205525	0.630442	0.609667	0.421676	0.794308	2.48302	0.000326436	0.0041224
chrX:118848:-	chrX:118848:-	chrX	118848	118848	-	-0.840041	0.593565	0.963742	-0.985091	0.556437	NA	-0.977755	0.543227	0.887038	1.40881	0.34302	NA	-1.37435	0.392889	0.783026
chrX:119019-119022:-	chrX:119022:-	chrX	119019	119022	-	-1.33016	0.434273	0.910843	-1.70345	0.386925	0.705136	-0.599162	0.70964	0.94124	-0.0731146	0.963563	NA	2.80588	0.044247	0.213983
chrX:119066-119142:-	chrX:119123:-	chrX	119066	119142	-	-0.331485	0.310893	0.829455	-1.15542	0.00231284	0.0318402	0.121832	0.705422	0.940231	0.603835	0.0609815	0.374226	3.82409	7e-38	5.58e-35
chrX:119211-119227:-	chrX:119227:-	chrX	119211	119227	-	0.0140911	0.991287	0.999794	-0.335895	0.821405	0.942727	0.521745	0.677018	0.933469	0.648438	0.61616	0.887633	5.29303	9.35e-07	2.18e-05
chrX:119255-119257:-	chrX:119257:-	chrX	119255	119257	-	-1.86025	0.430849	0.909605	-1.15664	0.624282	0.855547	1.37086	0.503033	0.873475	1.4005	0.505918	NA	5.29707	0.00481456	0.0392905
chrX:119279:-	chrX:119279:-	chrX	119279	119279	-	-1.96327	0.500705	NA	0.239775	0.93387	NA	-1.75848	0.546415	NA	-1.29206	0.657648	NA	3.85038	0.13122	NA
chrX:119301-119316:-	chrX:119316:-	chrX	119301	119316	-	-2.08818	0.309891	0.828712	-0.366437	0.839673	NA	-1.86491	0.369388	NA	-2.84026	0.171841	NA	3.22106	0.0331763	0.174589
chrX:119338-119361:-	chrX:119361:-	chrX	119338	119361	-	-0.0430897	0.956539	0.996352	-0.448904	0.617734	0.852083	0.979631	0.188989	0.609544	-0.332187	0.705446	0.919065	4.16336	1.43e-09	5.43e-08
chrX:119387-119396:-	chrX:119387:-	chrX	119387	119396	-	-2.46941	0.228176	0.740889	-0.13049	0.938811	NA	0.344118	0.82957	NA	-3.22071	0.119998	NA	2.17909	0.149341	0.478982
chrX:119457-119468:-	chrX:119468:-	chrX	119457	119468	-	-0.522979	0.83996	NA	0.178755	0.944945	NA	-1.73527	0.505588	NA	0.259745	0.918834	NA	4.17512	0.0563087	NA
chrX:119615-119623:-	chrX:119615:-	chrX	119615	119623	-	2.51497	0.157673	0.626038	1.80202	0.342783	0.666816	3.43925	0.0494398	0.293588	0.232032	0.914949	NA	5.01823	0.00345219	0.0299946
chrX:119658-119663:-	chrX:119663:-	chrX	119658	119663	-	-1.58365	0.179546	0.667166	-2.24986	0.114239	0.388237	-0.574286	0.603057	0.911424	-0.318821	0.776186	NA	1.99444	0.0481098	0.227338
chrX:119801-119808:-	chrX:119808:-	chrX	119801	119808	-	-0.931507	0.449773	0.917219	-0.5942	0.64554	0.864838	-0.402219	0.735244	0.946928	0.647629	0.566558	0.863731	4.13093	4.04e-05	0.000655954
chrX:119989:-	chrX:119989:-	chrX	119989	119989	-	1.91696	0.418414	NA	3.18513	0.164772	NA	2.20184	0.35009	NA	3.34041	0.141838	NA	5.29554	0.0136013	NA
chrX:121862-121879:-	chrX:121862:-	chrX	121862	121879	-	0.65759	0.67736	0.978174	-0.116067	0.946301	NA	0.884032	0.575571	NA	-0.651543	0.718753	NA	1.60015	0.296984	0.700438
chrX:121910:-	chrX:121910:-	chrX	121910	121910	-	0.19789	0.899301	0.992329	0.421057	0.792487	NA	0.742489	0.630542	NA	-2.00966	0.316283	NA	0.664335	0.663972	0.939099
chrX:122377-122467:-	chrX:122403:-	chrX	122377	122467	-	-0.325419	0.354986	0.862318	-0.204724	0.570765	0.826808	0.157895	0.650434	0.92653	-0.47367	0.19591	0.605838	-0.209488	0.547432	0.881306
chrX:122519-122534:-	chrX:122527:-	chrX	122519	122534	-	-0.392059	0.521051	0.944315	0.536985	0.373312	0.693663	0.577039	0.326747	0.759506	-0.261398	0.680602	0.911278	0.126574	0.830077	0.954858
chrX:122568-122596:-	chrX:122568:-	chrX	122568	122596	-	-0.110793	0.901807	0.993161	0.0998268	0.91349	0.973401	0.195971	0.826546	0.97235	-1.19144	0.239577	NA	-0.760801	0.406863	0.792131
chrX:122637-122689:-	chrX:122684:-	chrX	122637	122689	-	0.13296	0.835936	0.988547	0.273931	0.677259	0.879158	-0.421059	0.526736	0.881946	-1.40812	0.0623547	0.37739	-0.30501	0.638086	0.929518
chrX:122724-122733:-	chrX:122724:-	chrX	122724	122733	-	1.74327	0.314298	0.833211	1.84819	0.295338	NA	0.765372	0.673091	NA	-0.721047	0.736003	NA	2.12623	0.213919	0.5889
chrX:122838:-	chrX:122838:-	chrX	122838	122838	-	1.99238	0.419595	NA	2.13298	0.394272	NA	1.68981	0.498977	NA	-1.28347	0.645974	NA	-0.749464	0.786822	NA
chrX:122939-123007:-	chrX:122981:-	chrX	122939	123007	-	-0.149041	0.440204	0.914173	0.177152	0.359167	0.680983	-0.160083	0.407212	0.820013	0.0692113	0.720208	0.921947	-0.414432	0.0318701	0.169798
chrX:123050-123101:-	chrX:123078:-	chrX	123050	123101	-	0.100888	0.898156	0.992329	1.05493	0.173781	0.48381	0.487354	0.531459	0.88327	1.01775	0.189757	0.599084	3.57194	5.22e-07	1.27e-05
chrX:124095:-	chrX:124095:-	chrX	124095	124095	-	-0.817242	0.734211	NA	-0.199893	0.934064	NA	-0.16933	0.942975	NA	-3.1394	0.240776	NA	-0.42613	0.856569	NA
chrX:124245:-	chrX:124245:-	chrX	124245	124245	-	-1.91357	0.170828	0.652019	-0.870192	0.521916	0.797987	-0.583615	0.652342	0.927309	-2.29474	0.145649	NA	-0.01697	0.989181	0.99692
chrX:124413-124414:-	chrX:124413:-	chrX	124413	124414	-	2.02669	0.134684	0.57712	0.685082	0.645569	0.864838	1.84637	0.177268	0.591318	0.523503	0.72799	NA	1.20024	0.384365	0.777137
chrX:124466:-	chrX:124466:-	chrX	124466	124466	-	-0.703082	0.605301	0.964942	-3.18068	0.0936311	0.347662	-1.66179	0.255825	0.691846	0.265919	0.843321	NA	-0.239487	0.856996	0.963475
chrX:125078:-	chrX:125078:-	chrX	125078	125078	-	0.574264	0.691886	0.980868	-1.95313	0.319917	0.647451	1.73495	0.218779	0.646994	-0.319928	0.840909	NA	0.96136	0.499403	0.853817
chrX:125292:-	chrX:125292:-	chrX	125292	125292	-	0.291761	0.8578	NA	-3.7241	0.0797432	NA	-0.780224	0.649991	NA	-1.31386	0.481037	NA	-0.0375114	0.981698	NA
chrX:125956:-	chrX:125956:-	chrX	125956	125956	-	-0.245872	0.913872	NA	1.05845	0.63541	NA	-1.98319	0.443562	NA	-1.40327	0.578964	NA	-3.82702	0.139476	NA
chrX:126160:-	chrX:126160:-	chrX	126160	126160	-	1.79068	0.35516	0.862318	-0.595506	0.798761	NA	1.87134	0.335232	NA	1.75694	0.374025	NA	1.21222	0.535372	0.873485
chrX:126366-126452:-	chrX:126374:-	chrX	126366	126452	-	0.160619	0.639806	0.969849	-1.65078	2.66e-06	0.000167082	-0.0994777	0.772376	0.957858	-0.190646	0.580708	0.868996	0.423919	0.216149	0.592517
chrX:126475:-	chrX:126475:-	chrX	126475	126475	-	0.962624	0.768923	NA	1.77304	0.587059	NA	-0.240839	0.941626	NA	0.225584	0.945317	NA	4.76838	0.109376	NA
chrX:127001-127014:-	chrX:127014:-	chrX	127001	127014	-	0.134786	0.91772	0.993582	-1.36292	0.36195	NA	-1.89144	0.207245	0.632461	-0.718389	0.609916	NA	-0.863689	0.521329	0.866761
chrX:127104:-	chrX:127104:-	chrX	127104	127104	-	2.14201	0.261567	NA	-2.07369	0.378035	NA	1.19099	0.544852	NA	0.149812	0.944533	NA	1.72809	0.36716	NA
chrX:128958-129039:-	chrX:129031:-	chrX	128958	129039	-	-0.0500222	0.825421	0.988315	-0.278284	0.228382	0.554765	-0.351632	0.124211	0.497242	-0.0222219	0.922881	0.979873	-0.525464	0.0210861	0.125279
chrX:129757:-	chrX:129757:-	chrX	129757	129757	-	3.19141	0.116278	NA	1.77366	0.412027	NA	2.3032	0.267409	NA	1.18632	0.595965	NA	0.774079	0.721823	NA
chrX:130209:-	chrX:130209:-	chrX	130209	130209	-	0.95653	0.415359	0.902521	2.3054	0.0450499	0.230296	0.583788	0.62843	0.919135	1.67316	0.153774	NA	0.469702	0.692902	0.948208
chrX:130687-130710:-	chrX:130707:-	chrX	130687	130710	-	-0.154179	0.752856	0.986786	-0.402016	0.434509	0.740204	-1.19405	0.0230702	0.179807	0.916345	0.0579859	0.365525	-0.804764	0.107347	0.390505
chrX:130744-130836:-	chrX:130771:-	chrX	130744	130836	-	-0.287993	0.26192	0.781299	-0.611099	0.0183727	0.129347	-0.793425	0.00211927	0.0355601	0.0885583	0.73072	0.925719	-0.786478	0.00223675	0.0210269
chrX:131155:-	chrX:131155:-	chrX	131155	131155	-	1.85759	0.179737	0.667499	2.37445	0.0880103	0.336948	2.11334	0.126404	0.500685	0.879534	0.555444	NA	0.106897	0.942502	0.985204
chrX:131556:-	chrX:131556:-	chrX	131556	131556	-	0.22858	0.897302	NA	0.577829	0.748715	NA	0.710666	0.684635	NA	-0.404531	0.834627	NA	-0.189578	0.915711	NA
chrX:131794:-	chrX:131794:-	chrX	131794	131794	-	0.897691	0.343262	0.852404	0.856855	0.380458	0.699472	0.80476	0.400521	0.814844	-0.267251	0.800173	NA	0.298263	0.756477	0.948208
chrX:132349:-	chrX:132349:-	chrX	132349	132349	-	4.1582	0.0912618	NA	1.75017	0.529943	NA	3.78468	0.127794	NA	1.60004	0.564546	NA	0.759932	0.785323	NA
chrX:133928-134060:-	chrX:133993:-	chrX	133928	134060	-	0.257831	0.299731	0.820016	0.0412912	0.869644	0.959757	-0.245823	0.326858	0.759506	0.145112	0.56341	0.861823	-0.296644	0.234654	0.619276
chrX:134083-134085:-	chrX:134083:-	chrX	134083	134085	-	-0.96354	0.459059	0.919006	0.674665	0.580315	0.831827	-0.0306122	0.98021	0.996391	1.10428	0.355619	NA	0.33532	0.778186	0.948208
chrX:135937:-	chrX:135937:-	chrX	135937	135937	-	-0.823136	0.464325	0.922316	-1.69017	0.182858	0.4969	-1.1886	0.306301	0.742755	-0.510478	0.656429	NA	-1.38594	0.227169	0.608585
chrX:136441:-	chrX:136441:-	chrX	136441	136441	-	0.772058	0.722559	NA	1.24944	0.568414	NA	1.2051	0.576984	NA	-2.34981	0.352991	NA	1.60274	0.451018	NA
chrX:136494:-	chrX:136494:-	chrX	136494	136494	-	-1.24639	0.478513	NA	-1.09999	0.552306	NA	-1.01213	0.564016	NA	-0.958959	0.598073	NA	0.631507	0.692773	NA
chrX:136675:-	chrX:136675:-	chrX	136675	136675	-	0.452856	0.635431	0.969021	-0.609936	0.571396	0.827215	-0.0839388	0.932492	0.985468	0.889555	0.356831	NA	-0.0399688	0.967058	0.991052
chrX:136713:-	chrX:136713:-	chrX	136713	136713	-	1.5886	0.368869	NA	0.183608	0.926544	NA	0.343718	0.855546	NA	1.8582	0.299735	NA	1.32715	0.453781	NA
chrX:136744:-	chrX:136744:-	chrX	136744	136744	-	3.25195	0.168851	NA	3.70502	0.119688	NA	3.19615	0.179557	NA	3.94271	0.0952869	NA	3.54024	0.129873	NA
chrX:136767:-	chrX:136767:-	chrX	136767	136767	-	0.466192	0.73595	0.986154	-0.0846662	0.954708	0.986474	0.917493	0.502866	0.873453	1.33346	0.331453	NA	1.03954	0.440838	0.812965
chrX:136788-136855:-	chrX:136806:-	chrX	136788	136855	-	-0.31707	0.107513	0.512717	0.0398099	0.840164	0.950035	-0.159158	0.419244	0.827437	-0.0578793	0.769491	0.940651	-0.360118	0.067368	0.286002
chrX:136894:-	chrX:136894:-	chrX	136894	136894	-	-1.94448	0.302547	NA	-2.82215	0.199303	NA	-3.2926	0.137781	NA	-2.88861	0.18391	NA	-0.848833	0.6319	NA
chrX:136956-137039:-	chrX:137012:-	chrX	136956	137039	-	-1.05181	0.0233498	0.187526	-1.02234	0.0309037	0.184456	-1.65421	0.000511661	0.012017	-2.02413	4.87e-05	0.00340277	-0.190637	0.675315	0.942986
chrX:137095:-	chrX:137095:-	chrX	137095	137095	-	0.914057	0.609899	0.965534	-0.668215	0.759357	NA	0.856881	0.636888	NA	1.33106	0.463446	NA	3.02088	0.0742711	0.305961
chrX:137124-137134:-	chrX:137134:-	chrX	137124	137134	-	1.67736	0.174026	0.658297	-0.30351	0.844694	0.951603	2.11097	0.0846185	0.405629	0.891294	0.506923	NA	3.99994	0.000687558	0.00780498
chrX:139573-139589:-	chrX:139589:-	chrX	139573	139589	-	-0.445615	0.875488	NA	1.66939	0.554969	NA	-0.240824	0.932515	NA	0.225599	0.936772	NA	5.85524	0.0174739	NA
chrX:139644-139647:-	chrX:139644:-	chrX	139644	139647	-	0.656575	0.724784	0.985238	0.913723	0.633208	NA	-1.1418	0.610825	NA	-0.618594	0.776701	NA	3.19153	0.0670289	0.284912
chrX:139675-139697:-	chrX:139692:-	chrX	139675	139697	-	-0.551582	0.0523537	0.326066	0.135816	0.632849	0.858481	-0.237489	0.403395	0.816878	-0.226801	0.425414	0.795698	-0.731042	0.0101259	0.0703455
chrX:139726:-	chrX:139726:-	chrX	139726	139726	-	2.46313	0.319829	NA	-1.14361	0.684579	NA	1.39083	0.586404	NA	-1.176	0.676146	NA	3.06846	0.210688	NA
chrX:139748:-	chrX:139748:-	chrX	139748	139748	-	0.9107	0.308769	0.827673	1.67655	0.0602561	0.273707	2.39063	0.00541141	0.0685934	-1.19109	0.314507	0.720036	3.86079	4.42e-06	9.01e-05
chrX:139775-139780:-	chrX:139775:-	chrX	139775	139780	-	1.29403	0.138857	0.587247	0.509517	0.5789	0.830936	0.161631	0.859222	0.976178	-0.0985848	0.917391	0.979426	0.263114	0.768472	0.948208
chrX:139902-139904:-	chrX:139904:-	chrX	139902	139904	-	2.9778	0.0313141	0.230211	2.29616	0.106575	0.373323	1.85234	0.19216	0.612215	-1.23575	0.518179	NA	1.34833	0.344145	0.749163
chrX:139932-140013:-	chrX:139951:-	chrX	139932	140013	-	-0.4533	0.150852	0.612359	0.267409	0.396744	0.712891	-0.260416	0.409221	0.820757	-0.753516	0.0171865	0.192898	-1.18924	0.00016659	0.00228083
chrX:140041:-	chrX:140041:-	chrX	140041	140041	-	-1.60933	0.430478	NA	-0.995787	0.628427	NA	-0.822178	0.674038	NA	-3.38174	0.138367	NA	1.35741	0.451046	NA
chrX:140064-140136:-	chrX:140100:-	chrX	140064	140136	-	0.0643192	0.925314	0.994338	-0.415699	0.545905	0.811818	0.352442	0.607427	0.912956	-0.912336	0.186077	0.594815	2.3409	0.000628747	0.00723002
chrX:140174:-	chrX:140174:-	chrX	140174	140174	-	-1.18957	0.464785	0.922486	0.109764	0.943827	NA	-0.65245	0.680644	0.934098	-2.13652	0.272809	NA	1.88651	0.188762	0.548132
chrX:142610:-	chrX:142610:-	chrX	142610	142610	-	-0.506682	0.798473	NA	-3.54848	0.133614	NA	-4.0473	0.0871067	NA	0.655894	0.737223	NA	-1.86622	0.377088	NA
chrX:142634-142658:-	chrX:142634:-	chrX	142634	142658	-	-0.157728	0.658031	0.973833	-0.339819	0.359573	0.681134	-0.27807	0.440739	0.842212	-0.204736	0.577728	0.868122	-0.133768	0.705474	0.948208
chrX:142799:-	chrX:142799:-	chrX	142799	142799	-	0.586828	0.795225	NA	2.5465	0.230421	NA	2.37653	0.258243	NA	2.7485	0.192486	NA	0.935951	0.668837	NA
chrX:142983-143029:-	chrX:143010:-	chrX	142983	143029	-	0.145342	0.809302	0.987504	0.782597	0.195985	0.514226	0.707587	0.228997	0.660717	0.857815	0.153214	0.555435	4.76672	7.87e-19	9.96e-17
chrX:143969-143983:-	chrX:143983:-	chrX	143969	143983	-	1.43251	0.199833	0.700181	0.228784	0.852195	0.954134	0.980449	0.390313	0.808316	-1.4776	0.326387	NA	1.41637	0.203024	0.572418
chrX:144874:-	chrX:144874:-	chrX	144874	144874	-	-0.304936	0.846293	0.98946	-3.59656	0.079279	NA	0.807316	0.595144	NA	-2.13454	0.281024	NA	0.829153	0.581384	0.899771
chrX:144896-144932:-	chrX:144917:-	chrX	144896	144932	-	0.252667	0.30702	0.826187	0.00565432	0.98233	0.993972	0.560592	0.023076	0.179807	-0.5875	0.0255298	0.238868	0.19471	0.429791	0.805834
chrX:145999:-	chrX:145999:-	chrX	145999	145999	-	0.333189	0.784869	0.987504	-0.67092	0.620915	0.853287	-0.211706	0.866868	0.977114	-0.743445	0.585145	NA	0.446233	0.711955	0.948208
chrX:146047-146066:-	chrX:146066:-	chrX	146047	146066	-	0.747422	0.563789	0.95907	-0.00130832	0.999261	0.999747	0.632051	0.630063	0.919525	-1.08846	0.49395	NA	1.89504	0.129811	0.439788
chrX:146090-146104:-	chrX:146090:-	chrX	146090	146104	-	-0.351775	0.735942	0.986154	-0.595961	0.593809	0.838565	0.515401	0.610532	0.914357	-0.0642883	0.952032	NA	1.15202	0.241763	0.629365
chrX:146802-146824:-	chrX:146824:-	chrX	146802	146824	-	-1.00298	0.535818	0.950011	1.52646	0.265341	0.595921	0.788503	0.570397	0.898124	-0.239246	0.880919	NA	3.78169	0.0029396	0.0263226
chrX:146846-146869:-	chrX:146857:-	chrX	146846	146869	-	-0.0974871	0.878447	0.990025	0.777932	0.217611	0.541978	0.733935	0.23409	0.666824	-1.14148	0.130836	0.518223	2.66078	5.48e-06	0.000109295
chrX:148158:-	chrX:148158:-	chrX	148158	148158	-	2.59971	0.257956	NA	1.82647	0.444827	NA	2.50521	0.278149	NA	0.263711	0.919553	NA	-2.13895	0.422759	NA
chrX:148530:-	chrX:148530:-	chrX	148530	148530	-	4.12581	0.241626	NA	0.257962	0.945533	NA	3.20872	0.3678	NA	0.225569	0.952363	NA	-0.639526	0.865505	NA
chrX:148639:-	chrX:148639:-	chrX	148639	148639	-	0.131007	0.945845	NA	0.783931	0.685016	NA	-1.96547	0.39641	NA	0.175398	0.929719	NA	-1.36384	0.512566	NA
chrX:148796-148822:-	chrX:148822:-	chrX	148796	148822	-	3.24873	0.013703	0.128992	3.4738	0.00898342	0.080096	3.52282	0.00745217	0.0842819	1.46798	0.309215	NA	-0.127646	0.933837	0.98337
chrX:148877:-	chrX:148877:-	chrX	148877	148877	-	0.441805	0.795667	NA	0.581183	0.740728	NA	0.129128	0.941222	NA	0.257668	0.885609	NA	0.524824	0.755816	NA
chrX:149120:-	chrX:149120:-	chrX	149120	149120	-	0.8727	0.413016	0.900924	1.63244	0.125027	0.40637	0.903656	0.399449	0.814426	0.587888	0.59758	NA	-0.576216	0.611597	0.917741
chrX:150382-150394:-	chrX:150394:-	chrX	150382	150394	-	-0.13707	0.892687	0.991819	-0.294157	0.781984	0.926246	-2.05331	0.08622	0.409756	0.574315	0.571583	NA	-1.90721	0.0904458	0.350772
chrX:150430-150517:-	chrX:150478:-	chrX	150430	150517	-	0.4175	0.0978674	0.482764	0.717107	0.00453159	0.0497645	-0.0629228	0.803568	0.967246	0.429107	0.0898657	0.441163	-0.722965	0.00432986	0.0360204
chrX:150541-150549:-	chrX:150541:-	chrX	150541	150549	-	0.133192	0.850253	0.98946	0.524881	0.46425	0.763496	0.27845	0.693872	0.938462	0.693556	0.32855	0.730259	0.491378	0.476315	0.838945
chrX:150621-150626:-	chrX:150621:-	chrX	150621	150626	-	-0.40357	0.714973	0.984606	0.584829	0.590803	0.836297	0.601942	0.571215	0.898318	-1.02347	0.407648	NA	0.1051	0.921566	0.979272
chrX:152183-152232:-	chrX:152183:-	chrX	152183	152232	-	0.983057	0.120642	0.54602	0.435805	0.510537	0.791809	-0.0299156	0.963907	0.993027	-0.480385	0.494082	0.829899	-0.455441	0.491612	0.847998
chrX:152307:-	chrX:152307:-	chrX	152307	152307	-	2.54419	0.0451458	0.294769	0.527788	0.707527	0.89382	1.21825	0.355221	0.782186	-0.789085	0.623764	NA	-1.025	0.492057	0.848182
chrX:152994:-	chrX:152994:-	chrX	152994	152994	-	-0.977648	0.524523	0.946154	-2.60004	0.189156	NA	-0.0788624	0.957582	NA	-0.419129	0.78663	NA	-1.54155	0.328009	0.733826
chrX:153015-153133:-	chrX:153082:-	chrX	153015	153133	-	-0.0318639	0.889833	0.990962	-0.450419	0.058533	0.268745	-0.517378	0.0271926	0.200407	-0.422835	0.0752524	0.406116	-0.192869	0.401545	0.788322
chrX:153488:-	chrX:153488:-	chrX	153488	153488	-	-0.134372	0.944301	NA	-0.916193	0.66268	NA	-0.326665	0.867321	NA	-1.05807	0.617967	NA	-1.18223	0.555452	NA
chrX:153521-153559:-	chrX:153559:-	chrX	153521	153559	-	-0.366843	0.59022	0.963484	0.419279	0.536827	0.806085	0.155078	0.817676	0.970355	-1.05856	0.1553	0.558022	-0.53697	0.430172	0.806048
chrX:153819:-	chrX:153819:-	chrX	153819	153819	-	0.665189	0.692789	NA	-0.050965	0.977544	NA	-0.104761	0.952474	NA	-0.116149	0.948999	NA	-0.0233378	0.989149	NA
chrX:153848-153851:-	chrX:153848:-	chrX	153848	153851	-	0.661234	0.672146	0.976793	1.99113	0.191071	NA	2.18338	0.14401	NA	-0.264331	0.881326	NA	-0.117831	0.941909	0.985202
chrX:154506:-	chrX:154506:-	chrX	154506	154506	-	-0.342052	0.860903	NA	-0.747719	0.720522	NA	-1.25222	0.549216	NA	-0.0312881	0.987445	NA	0.47073	0.803237	NA
chrX:154662:-	chrX:154662:-	chrX	154662	154662	-	-1.13282	0.391971	0.888253	-2.00381	0.177	0.488646	-1.79701	0.196932	0.619133	-1.64165	0.250652	NA	-0.815593	0.529621	0.870128
chrX:154694-154818:-	chrX:154739:-	chrX	154694	154818	-	-0.0491357	0.827042	0.988315	-0.016156	0.942761	0.981873	-0.126992	0.572352	0.898804	-0.000898732	0.996813	0.99916	-0.407461	0.0700373	0.294164
chrX:155004:-	chrX:155004:-	chrX	155004	155004	-	-4.42369	0.0758299	NA	-2.22771	0.365587	NA	-0.193387	0.927155	NA	-1.2972	0.568244	NA	-4.61757	0.06385	NA
chrX:156135-156226:-	chrX:156145:-	chrX	156135	156226	-	-0.145818	0.608702	0.965044	-0.49321	0.0942482	0.348814	-0.364691	0.205385	0.630441	0.188806	0.511355	0.838335	-1.04471	0.000326777	0.00412508
chrX:156521-156525:-	chrX:156522:-	chrX	156521	156525	-	-0.479115	0.489247	0.930916	-0.891151	0.229509	0.556055	-0.391401	0.574088	0.899597	-0.631344	0.384417	0.770751	-0.573569	0.405903	0.791236
chrX:156572-156585:-	chrX:156572:-	chrX	156572	156585	-	0.292306	0.699049	0.98254	0.691727	0.366665	0.687691	0.798668	0.285455	0.722088	-0.542514	0.514524	0.840443	0.348693	0.641656	0.930403
chrX:156613-156635:-	chrX:156626:-	chrX	156613	156635	-	-1.14266	0.147558	0.606765	-0.149566	0.846807	0.952491	0.123859	0.868044	0.977114	-0.53782	0.497782	0.831782	-0.376292	0.615278	0.919199
chrX:156664:-	chrX:156664:-	chrX	156664	156664	-	0.946727	0.649037	NA	-2.18717	0.372378	NA	0.753911	0.720857	NA	1.37153	0.513551	NA	-0.000461721	0.999828	NA
chrX:156687-156789:-	chrX:156789:-	chrX	156687	156789	-	-0.00884218	0.971783	0.997489	-0.322601	0.203713	0.524331	0.345407	0.166391	0.573136	-0.209606	0.407799	0.786463	-0.266933	0.285974	0.686673
chrX:157198:-	chrX:157198:-	chrX	157198	157198	-	-0.229294	0.860439	0.98946	-1.10184	0.452751	NA	-0.626479	0.642268	NA	-0.222779	0.869439	NA	-0.377061	0.772067	0.948208
chrX:157229-157403:-	chrX:157303:-	chrX	157229	157403	-	-0.356073	0.161156	0.633646	-0.0529897	0.83485	0.948031	-0.13783	0.587555	0.904769	0.0942251	0.710825	0.919545	-0.465326	0.0670746	0.284984
chrX:157927:-	chrX:157927:-	chrX	157927	157927	-	-0.437006	0.850798	0.98946	0.306848	0.894578	0.967238	-1.6562	0.479685	0.861714	-1.18977	0.611625	NA	5.50139	0.00301415	0.026847
chrX:159829-159901:-	chrX:159876:-	chrX	159829	159901	-	-0.0538227	0.861102	0.98946	1.12411	0.00025367	0.00641739	-0.168274	0.584718	0.903714	-0.99813	0.00129526	0.0374608	-1.45939	2.37e-06	5.12e-05
chrX:160563:-	chrX:160563:-	chrX	160563	160563	-	-1.45838	0.366831	0.871746	-0.362154	0.818258	NA	-3.20668	0.115412	NA	-1.3546	0.424044	NA	-0.486774	0.749024	NA
chrX:161721:-	chrX:161721:-	chrX	161721	161721	-	0.0138615	0.991934	0.999854	0.232414	0.868938	0.959757	0.0235388	0.986436	0.998319	0.762489	0.577048	NA	0.009068	0.994679	0.998436
chrX:163845:-	chrX:163845:-	chrX	163845	163845	-	4.4504	0.0590969	NA	3.58106	0.1416	NA	3.52013	0.143353	NA	2.45607	0.338321	NA	2.63628	0.28005	NA
chrX:165352-165406:-	chrX:165383:-	chrX	165352	165406	-	-0.708513	0.00244932	0.0380813	-0.741248	0.00184819	0.026985	-0.934035	7.58e-05	0.00267396	0.0455953	0.845269	0.962456	-0.712447	0.00224146	0.0210623
chrX:165806:-	chrX:165806:-	chrX	165806	165806	-	-2.68861	0.244699	NA	-2.83635	0.253158	NA	-4.8297	0.0544857	NA	-1.06289	0.627958	NA	-2.13716	0.334048	NA
chrX:165849:-	chrX:165849:-	chrX	165849	165849	-	0.19592	0.868135	0.98946	-0.228638	0.857464	0.955064	0.771835	0.506254	0.874342	-0.569864	0.663897	NA	0.72857	0.525476	0.868089
chrX:166021:-	chrX:166021:-	chrX	166021	166021	-	1.36407	0.356869	0.863546	0.600332	0.701532	NA	0.753484	0.619608	NA	-1.82721	0.355561	NA	0.0508447	0.973634	0.992369
chrX:166043-166061:-	chrX:166061:-	chrX	166043	166061	-	-0.388245	0.704399	0.9839	0.794335	0.427083	0.734841	0.255455	0.798701	0.966508	-1.14454	0.320255	NA	-0.415195	0.68239	0.945895
chrX:166254:-	chrX:166254:-	chrX	166254	166254	-	0.525301	0.737977	0.986317	1.5032	0.332195	NA	0.209534	0.897054	NA	1.05341	0.505782	NA	0.970733	0.525399	0.868089
chrX:166457-166470:-	chrX:166457:-	chrX	166457	166470	-	3.2651	0.0773084	0.417086	-0.821161	0.721002	NA	0.645759	0.742486	NA	-2.33051	0.316978	NA	-3.19561	0.170017	0.517549
chrX:166549:-	chrX:166549:-	chrX	166549	166549	-	1.10611	0.549398	NA	1.76709	0.339627	NA	0.756938	0.689076	NA	0.998807	0.602172	NA	1.00952	0.583583	NA
chrX:167340-167351:-	chrX:167351:-	chrX	167340	167351	-	0.964515	0.19557	0.693289	0.633913	0.415219	0.725472	0.578622	0.447128	0.844972	0.0325353	0.967884	0.991201	0.126354	0.8685	0.966258
chrX:167379:-	chrX:167379:-	chrX	167379	167379	-	1.29954	0.26935	0.789478	1.28128	0.290363	0.622103	1.19952	0.313159	0.748217	1.12342	0.357304	NA	0.459073	0.703806	0.948208
chrX:167500:-	chrX:167500:-	chrX	167500	167500	-	0.880488	0.493325	0.932759	1.4659	0.256155	0.586726	0.628489	0.631226	0.91986	0.447259	0.742116	NA	0.861614	0.5002	0.854194
chrX:168066:-	chrX:168066:-	chrX	168066	168066	-	0.122204	0.951308	NA	1.34791	0.492594	NA	-0.783572	0.713737	NA	-1.37938	0.552829	NA	-1.17966	0.58076	NA
chrX:168101:-	chrX:168101:-	chrX	168101	168101	-	4.18678	0.0659925	NA	3.64549	0.120055	NA	3.52496	0.128336	NA	0.22558	0.932239	NA	2.44457	0.30277	NA
chrX:168565-168581:-	chrX:168565:-	chrX	168565	168581	-	1.51129	0.176689	0.663702	1.8289	0.106627	0.373456	0.628456	0.59178	0.9067	0.651736	0.589264	NA	1.27582	0.254748	0.64522
chrX:168837:-	chrX:168837:-	chrX	168837	168837	-	1.24423	0.082972	0.436499	1.19514	0.103901	0.367992	0.615315	0.403905	0.817077	-0.191687	0.81004	0.953683	-0.65625	0.396008	0.785243
chrX:170576:-	chrX:170576:-	chrX	170576	170576	-	1.12153	0.28656	0.807964	2.18417	0.0357784	0.202669	1.72495	0.0968904	0.436662	0.38953	0.732195	NA	-0.0122448	0.991129	0.997438
chrX:172105-172111:-	chrX:172111:-	chrX	172105	172111	-	1.07085	0.348909	0.857007	0.859794	0.463245	0.762854	0.575473	0.620887	0.916913	-1.93891	0.190206	NA	-1.79639	0.169902	0.517369
chrX:172164:-	chrX:172164:-	chrX	172164	172164	-	1.81434	0.152216	0.614096	1.90535	0.138692	0.429339	1.64362	0.198447	0.620966	-0.348388	0.813504	NA	-1.35886	0.365311	0.764489
chrX:172426-172533:-	chrX:172515:-	chrX	172426	172533	-	0.660307	0.0541446	0.332656	0.287404	0.403462	0.716804	0.291871	0.395325	0.811926	-1.34953	0.000107389	0.00634771	-1.05113	0.00229836	0.0214983
chrX:172780-172784:-	chrX:172780:-	chrX	172780	172784	-	1.19616	0.0698457	0.392264	1.61983	0.0147692	0.111974	1.15763	0.0811063	0.396329	-0.746485	0.327125	0.729332	-0.52314	0.454329	0.823416
chrX:172880-172895:-	chrX:172891:-	chrX	172880	172895	-	0.648631	0.44136	0.914173	0.426584	0.625627	0.855644	0.800169	0.342936	0.773308	-0.492532	0.595926	0.8775	-1.34578	0.146874	0.473791
chrX:172916-173090:-	chrX:172956:-	chrX	172916	173090	-	0.677338	0.163215	0.637276	0.970086	0.0459296	0.232854	0.379813	0.43456	0.837241	-0.107804	0.82482	0.957413	2.28534	2.49e-06	5.34e-05
chrX:174235:-	chrX:174235:-	chrX	174235	174235	-	0.357059	0.836545	0.988547	1.61454	0.34133	NA	0.0479265	0.978458	NA	-1.54086	0.467763	NA	0.659491	0.698065	0.948208
chrX:174293:-	chrX:174293:-	chrX	174293	174293	-	-0.454731	0.754137	0.986786	0.529357	0.710629	NA	0.214952	0.879027	0.978904	1.24111	0.368169	NA	-0.0639997	0.963651	0.990106
chrX:174344-174345:-	chrX:174345:-	chrX	174344	174345	-	0.5284	0.196148	0.693593	1.39898	0.000601735	0.0120184	0.7398	0.0702784	0.365615	0.946421	0.02123	0.218035	0.570126	0.161702	0.502944
chrX:174383-174384:-	chrX:174383:-	chrX	174383	174384	-	0.667808	0.534433	0.949584	0.947728	0.386444	0.7047	0.487027	0.655636	0.928031	0.410166	0.71564	NA	0.397774	0.712191	0.948208
chrX:175373:-	chrX:175373:-	chrX	175373	175373	-	1.59824	0.51386	NA	1.76976	0.478126	NA	2.60527	0.278126	NA	0.36962	0.890801	NA	-0.533715	0.843981	NA
chrX:175640:-	chrX:175640:-	chrX	175640	175640	-	4.15812	0.193738	NA	0.257972	0.940844	NA	3.20521	0.323105	NA	0.225579	0.948261	NA	-0.639517	0.85404	NA
chrX:175737:-	chrX:175737:-	chrX	175737	175737	-	4.37982	0.109016	NA	3.56925	0.202417	NA	2.78881	0.322955	NA	0.225578	0.94119	NA	-0.639519	0.834331	NA
chrX:175767-175809:-	chrX:175785:-	chrX	175767	175809	-	8.45128	3.3e-09	4.21e-07	7.31342	3.31e-07	2.79e-05	7.87767	3.59e-08	4e-06	5.42711	0.000176115	0.00941009	2.68119	0.0735193	0.303825
chrX:176028-176032:-	chrX:176028:-	chrX	176028	176032	-	4.59019	0.00717131	0.0830711	3.73239	0.0323093	0.190161	3.78005	0.0285414	0.206747	1.87008	0.318989	NA	0.307716	0.876801	0.968141
chrX:177499-177609:-	chrX:177564:-	chrX	177499	177609	-	0.828817	0.0014162	0.0248757	0.485922	0.0667521	0.290155	0.393828	0.133516	0.514454	-0.202989	0.453971	0.809748	-0.301746	0.253652	0.643863
chrX:177645-177654:-	chrX:177645:-	chrX	177645	177654	-	0.393403	0.750654	0.986786	1.52703	0.208139	0.52964	1.04355	0.389319	0.808029	1.11498	0.366786	NA	-0.353124	0.782935	0.948208
chrX:178218-178227:-	chrX:178218:-	chrX	178218	178227	-	4.60263	0.00599005	0.0726771	3.87034	0.0233043	0.152281	3.06556	0.0743114	0.37693	3.41951	0.0472096	NA	1.89262	0.282312	0.682032
chrX:178259-178267:-	chrX:178265:-	chrX	178259	178267	-	5.6716	5.48e-07	4.03e-05	4.65553	4.98e-05	0.00176783	5.26369	3.59e-06	0.000226556	3.63027	0.0018989	0.0493127	2.21733	0.062021	0.270987
chrX:180268-180371:-	chrX:180324:-	chrX	180268	180371	-	0.0976345	0.715974	0.984919	-0.023402	0.931433	0.978554	-0.351607	0.194512	0.615444	-0.292268	0.285458	0.696327	-0.125098	0.641234	0.93029
chrX:180553:-	chrX:180553:-	chrX	180553	180553	-	-0.693606	0.622823	0.966091	-0.026733	0.984916	NA	0.490751	0.71344	NA	0.0791729	0.954936	NA	-0.638876	0.645123	0.931971
chrX:180596:-	chrX:180596:-	chrX	180596	180596	-	1.35423	0.193583	0.690473	0.762146	0.489029	0.778749	0.583564	0.589552	0.906002	1.78375	0.0893664	NA	-0.0280878	0.97953	0.993854
chrX:180875:-	chrX:180875:-	chrX	180875	180875	-	-0.496644	0.70526	0.983902	-1.13443	0.459577	0.759535	0.17822	0.888284	0.979732	0.496915	0.698279	NA	2.63013	0.023802	0.136925
chrX:180924:-	chrX:180924:-	chrX	180924	180924	-	-3.32652	0.183549	NA	-1.2099	0.626045	NA	-1.68044	0.501545	NA	-0.202069	0.929497	NA	1.9367	0.350628	NA
chrX:180963:-	chrX:180963:-	chrX	180963	180963	-	-2.01357	0.31092	0.829455	-1.31133	0.508963	0.79099	-0.207774	0.898552	0.979732	-0.468475	0.790211	NA	3.52509	0.0127176	0.0841518
chrX:181175:-	chrX:181175:-	chrX	181175	181175	-	0.385558	0.885523	NA	1.65422	0.526183	NA	-0.312971	0.912613	NA	1.16956	0.660638	NA	2.1479	0.393851	NA
chrX:181208-181232:-	chrX:181228:-	chrX	181208	181232	-	-0.417675	0.495731	0.934388	-1.40314	0.0489638	0.24181	-0.585948	0.350173	0.778445	-0.233146	0.712466	0.91989	1.6273	0.00455665	0.0375853
chrX:181526-181538:-	chrX:181526:-	chrX	181526	181538	-	-0.46789	0.750203	0.986786	2.41214	0.0669227	0.290486	1.81342	0.16939	0.578274	0.403888	0.779932	NA	1.25622	0.343353	0.748648
chrX:181735-181832:-	chrX:181785:-	chrX	181735	181832	-	-0.685363	0.00239948	0.0374485	-0.979148	2.1e-05	0.000903325	-0.259247	0.249474	0.685633	-0.705403	0.00203177	0.0514968	-0.335116	0.135303	0.451536
chrX:183844:-	chrX:183844:-	chrX	183844	183844	-	-0.0169495	0.988886	0.999683	0.806056	0.505062	0.788326	0.327147	0.786515	0.962633	0.307906	0.804313	NA	0.353015	0.765998	0.948208
chrX:184275-184312:-	chrX:184288:-	chrX	184275	184312	-	0.0867965	0.803837	0.987504	-0.169869	0.634867	0.859111	-0.125765	0.721141	0.943945	0.223385	0.527562	0.845614	-0.18553	0.596039	0.90894
chrX:184341:-	chrX:184341:-	chrX	184341	184341	-	-0.400117	0.813455	0.987504	0.80365	0.626565	NA	0.338017	0.837579	NA	0.769542	0.641532	NA	-1.01344	0.561408	0.888855
chrX:185580:-	chrX:185580:-	chrX	185580	185580	-	1.79464	0.503949	NA	-1.1407	0.701182	NA	2.3837	0.37113	NA	1.03047	0.715545	NA	0.940353	0.730945	NA
chrX:185674:-	chrX:185674:-	chrX	185674	185674	-	1.8365	0.355409	NA	0.615079	0.771841	NA	1.44488	0.472718	NA	-2.33964	0.332683	NA	-0.759494	0.728641	NA
chrX:185860:-	chrX:185860:-	chrX	185860	185860	-	-0.145657	0.930441	NA	0.307141	0.855995	NA	-0.245066	0.885228	NA	-0.255773	0.884294	NA	0.0561857	0.972643	NA
chrX:185959:-	chrX:185959:-	chrX	185959	185959	-	-2.82492	0.17589	NA	-0.544457	0.756164	NA	-1.01495	0.561763	NA	-0.609649	0.72886	NA	0.260897	0.871082	NA
chrX:186019:-	chrX:186019:-	chrX	186019	186019	-	-0.158557	0.908799	0.993278	0.545334	0.693589	NA	1.15845	0.37834	NA	-0.166	0.90931	NA	-0.350036	0.800352	0.948208
chrX:186455:-	chrX:186455:-	chrX	186455	186455	-	-0.415804	0.803053	0.987504	0.967909	0.550628	NA	-0.01922	0.990718	NA	-0.75164	0.673533	NA	0.0569951	0.971982	0.992025
chrX:186640-186643:-	chrX:186643:-	chrX	186640	186643	-	-0.392372	0.751017	0.986786	-0.371484	0.775165	0.924198	-1.14088	0.392531	0.810311	1.27515	0.280662	NA	0.737496	0.528371	0.869852
chrX:186671-186748:-	chrX:186699:-	chrX	186671	186748	-	-0.0105347	0.965832	0.997489	-0.0568215	0.818885	0.941113	0.080814	0.742705	0.948581	0.427712	0.0828206	0.424696	0.657079	0.0071917	0.0536677
chrX:187120-187134:-	chrX:187127:-	chrX	187120	187134	-	0.437802	0.660009	0.974101	0.304711	0.767577	0.920483	0.603913	0.544427	0.887888	-1.10294	0.337777	NA	-0.0557865	0.95578	0.988604
chrX:187188-187200:-	chrX:187188:-	chrX	187188	187200	-	-1.87289	0.168789	0.648375	-0.492016	0.705147	0.892835	-1.93533	0.16466	0.570919	-1.36924	0.321425	NA	-0.789858	0.532282	0.8717
chrX:187230:-	chrX:187230:-	chrX	187230	187230	-	2.76492	0.180266	NA	1.77202	0.416087	NA	0.71495	0.751132	NA	2.20026	0.302776	NA	2.23876	0.281187	NA
chrX:187290-187305:-	chrX:187296:-	chrX	187290	187305	-	0.684845	0.360177	0.866859	-0.725259	0.398793	0.714046	0.31659	0.679247	0.934006	-0.259371	0.751588	0.93362	0.470576	0.529876	0.870128
chrX:187350:-	chrX:187350:-	chrX	187350	187350	-	0.0358115	0.981319	0.998821	-0.932388	0.57905	NA	-0.18054	0.907489	NA	-1.35717	0.436715	NA	-1.38106	0.395025	0.784759
chrX:187451:-	chrX:187451:-	chrX	187451	187451	-	2.38217	0.258363	NA	1.29104	0.570614	NA	2.60022	0.217114	NA	2.50766	0.241535	NA	1.75552	0.410417	NA
chrX:187735:-	chrX:187735:-	chrX	187735	187735	-	-1.28786	0.48045	NA	-3.97703	0.071609	NA	-0.707806	0.692664	NA	-0.808502	0.661662	NA	-0.402303	0.817774	NA
chrX:187763-187852:-	chrX:187777:-	chrX	187763	187852	-	-0.485296	0.0119177	0.117487	-0.37378	0.0540832	0.257199	-0.281931	0.144044	0.533527	-0.130543	0.500045	0.832603	-0.324612	0.0918183	0.354393
chrX:188172:-	chrX:188172:-	chrX	188172	188172	-	-1.30759	0.624428	NA	-2.94057	0.301267	NA	-0.991206	0.708867	NA	-0.777424	0.772936	NA	0.513916	0.837647	NA
chrX:188211:-	chrX:188211:-	chrX	188211	188211	-	-0.459656	0.857002	NA	3.24787	0.138625	NA	1.29657	0.571427	NA	1.69622	0.460731	NA	-0.726766	0.775694	NA
chrX:188802:-	chrX:188802:-	chrX	188802	188802	-	3.20613	0.162789	NA	3.25292	0.166815	NA	4.20185	0.06242	NA	3.34583	0.153029	NA	2.44345	0.297268	NA
chrX:188824:-	chrX:188824:-	chrX	188824	188824	-	0.218868	0.874011	0.989808	1.08765	0.427648	0.735272	-0.418522	0.772151	0.957858	0.479551	0.733545	NA	-0.838122	0.562672	0.889138
chrX:189073-189081:-	chrX:189081:-	chrX	189073	189081	-	1.61633	0.0319103	0.233545	1.5023	0.0517824	0.250791	0.955094	0.217079	0.64497	-0.566022	0.527609	0.845614	0.6897	0.370436	0.768406
chrX:189249:-	chrX:189249:-	chrX	189249	189249	-	1.41461	0.42657	NA	1.6498	0.362016	NA	-0.239836	0.903567	NA	1.74399	0.333067	NA	-0.00837285	0.996455	NA
chrX:189397-189516:-	chrX:189448:-	chrX	189397	189516	-	-0.262122	0.194798	0.692305	-0.131497	0.516756	0.795355	-0.356658	0.078147	0.387258	0.701411	0.000514575	0.0202775	-0.096071	0.634175	0.927924
chrX:189879:-	chrX:189879:-	chrX	189879	189879	-	1.53152	0.374919	NA	1.21218	0.501489	NA	0.760884	0.67223	NA	0.222549	0.908561	NA	1.48269	0.388386	NA
chrX:190561:-	chrX:190561:-	chrX	190561	190561	-	-0.118987	0.947204	0.995779	0.995136	0.573249	NA	-0.593344	0.750751	NA	-0.89133	0.654809	NA	0.644994	0.710464	NA
chrX:190769:-	chrX:190769:-	chrX	190769	190769	-	-0.119247	0.944079	0.995529	0.988737	0.553471	NA	-1.17646	0.529213	NA	0.066839	0.969554	NA	0.924832	0.56928	0.893381
chrX:191084-191160:-	chrX:191102:-	chrX	191084	191160	-	0.0739681	0.673429	0.977022	0.530363	0.00255748	0.0339836	0.285518	0.103751	0.452945	0.250648	0.154976	0.557749	-0.12877	0.463191	0.829536
chrX:191381:-	chrX:191381:-	chrX	191381	191381	-	-1.84694	0.513744	NA	-1.14333	0.686032	NA	0.805526	0.76003	NA	-1.17573	0.67763	NA	4.24919	0.0825629	NA
chrX:191416-191444:-	chrX:191444:-	chrX	191416	191444	-	-2.74182	0.108612	0.516104	-1.01669	0.468557	0.765962	-0.542872	0.654369	0.927626	0.152972	0.896784	0.976891	4.36495	8.69e-06	0.000166013
chrX:191475-191492:-	chrX:191480:-	chrX	191475	191492	-	-0.663743	0.539814	0.951292	-4.28835	0.0128585	0.10207	-1.34594	0.257204	0.693534	-1.98391	0.159816	0.563784	3.74833	7.92e-05	0.00119036
chrX:191523-191556:-	chrX:191523:-	chrX	191523	191556	-	0.57903	0.642039	0.970589	1.0066	0.429657	0.736827	1.2001	0.321414	0.754617	0.138045	0.921134	0.979499	4.92668	8.16e-06	0.000156639
chrX:192233-192245:-	chrX:192239:-	chrX	192233	192245	-	-0.655177	0.315332	0.83415	-0.719516	0.302746	0.63404	-0.489083	0.454743	0.850396	0.794002	0.203387	0.614447	2.00901	0.000683389	0.00776317
chrX:193681-193707:-	chrX:193689:-	chrX	193681	193707	-	0.033185	0.961312	0.997489	-1.3645	0.0849701	0.329715	-0.861607	0.233651	0.666466	0.173547	0.804266	0.951629	-0.322015	0.639973	0.930024
chrX:194726:-	chrX:194726:-	chrX	194726	194726	-	4.06159	0.0573385	0.346049	4.89108	0.0217844	NA	2.78524	0.21342	NA	2.85433	0.212168	NA	2.88561	0.188282	NA
chrX:195012-195096:-	chrX:195078:-	chrX	195012	195096	-	0.759536	0.00943966	0.100499	1.67432	9.84e-09	1.25e-06	0.724739	0.0134963	0.125882	0.471448	0.112219	0.487397	0.155993	0.595782	0.908815
chrX:195216-195274:-	chrX:195271:-	chrX	195216	195274	-	-0.428571	0.331542	0.844753	-1.76125	0.000364435	0.00836112	0.105446	0.809586	0.968408	0.327405	0.457453	0.81158	1.29839	0.00240992	0.0223257
chrX:195303-195357:-	chrX:195311:-	chrX	195303	195357	-	-0.0386622	0.913635	0.993278	-0.189444	0.612402	0.84883	0.522817	0.136966	0.520544	0.755841	0.0332063	0.273465	0.929554	0.00689923	0.0519961
chrX:195523:-	chrX:195523:-	chrX	195523	195523	-	-0.434853	0.809347	NA	0.20584	0.909511	NA	0.79542	0.639763	NA	1.46971	0.383674	NA	-0.181581	0.917344	NA
chrX:195549:-	chrX:195549:-	chrX	195549	195549	-	0.0101412	0.995429	NA	-1.31151	0.540743	NA	0.215138	0.903251	NA	1.77865	0.292937	NA	-0.641841	0.724961	NA
chrX:195576:-	chrX:195576:-	chrX	195576	195576	-	-2.44873	0.107355	0.512284	-2.32092	0.155483	0.457089	-3.75279	0.0497157	0.29457	0.848085	0.515765	NA	-1.85452	0.190458	0.5514
chrX:196009-196025:-	chrX:196019:-	chrX	196009	196025	-	-0.995872	0.226179	0.738086	-2.28593	0.026846	0.168179	-0.257949	0.746441	0.949023	-0.255401	0.755352	0.935083	-0.214312	0.784292	0.948208
chrX:197116:-	chrX:197116:-	chrX	197116	197116	-	-2.69564	0.612063	NA	-1.99204	0.707837	NA	0.543977	0.916412	NA	-2.02443	0.70331	NA	2.40863	0.63871	NA
chrX:197395:-	chrX:197395:-	chrX	197395	197395	-	2.21036	0.281614	0.802708	0.265882	0.912543	NA	1.78527	0.394623	NA	-1.18606	0.627015	NA	4.62129	0.0197808	0.119145
chrX:204453-204462:-	chrX:204453:-	chrX	204453	204462	-	0.976996	0.68352	0.979257	0.257993	0.914948	0.973401	-0.240824	0.920589	0.983692	6.73454	0.00056761	NA	2.87634	0.162962	0.504697
chrX:204996-205014:-	chrX:205014:-	chrX	204996	205014	-	0.228981	0.874333	0.989808	0.314579	0.834863	0.948031	-0.186975	0.901405	0.980291	2.06804	0.134586	NA	2.02057	0.136664	0.454318
chrX:205061-205134:-	chrX:205065:-	chrX	205061	205134	-	0.180105	0.80263	0.987504	0.113039	0.88292	0.963698	0.165452	0.821122	0.970862	0.928821	0.195329	0.605573	3.65504	2.29e-08	7.13e-07
chrX:207339:-	chrX:207339:-	chrX	207339	207339	-	3.40457	0.296515	NA	0.257971	0.941419	NA	4.01022	0.216725	NA	0.225578	0.948764	NA	-0.639518	0.855445	NA
chrX:207576:-	chrX:207576:-	chrX	207576	207576	-	1.17034	0.423653	0.907045	0.945109	0.536644	NA	1.60179	0.269794	0.707909	-0.402837	0.814824	NA	1.80044	0.207885	0.579798
chrX:209631:-	chrX:209631:-	chrX	209631	209631	-	4.58686	0.0181234	0.15621	4.97695	0.0107771	NA	4.37113	0.0254281	NA	3.19283	0.124421	NA	0.773382	0.742422	0.948208
chrX:209993-210010:-	chrX:209993:-	chrX	209993	210010	-	-0.141646	0.887707	0.990954	1.2993	0.177741	0.49006	1.48539	0.114452	0.476984	0.644847	0.517459	NA	-0.0776214	0.937346	0.984381
chrX:210311:-	chrX:210311:-	chrX	210311	210311	-	2.7765	0.188296	NA	1.20808	0.600688	NA	2.37945	0.26574	NA	2.33036	0.283726	NA	1.93013	0.367413	NA
chrX:210850:-	chrX:210850:-	chrX	210850	210850	-	0.0914177	0.881627	0.990562	0.661266	0.284401	0.616107	0.1797	0.770901	0.957547	-0.0650352	0.919541	0.979426	0.493214	0.411562	0.794368
chrX:211271:-	chrX:211271:-	chrX	211271	211271	-	-1.89291	0.361306	NA	0.246764	0.896587	NA	-2.60138	0.257127	NA	-2.19898	0.328985	NA	-0.776472	0.684149	NA
chrX:211629:-	chrX:211629:-	chrX	211629	211629	-	0.312521	0.861087	NA	-0.208224	0.914395	NA	1.01996	0.560138	NA	-0.497732	0.802046	NA	0.825181	0.635308	NA
chrX:211651-211705:-	chrX:211666:-	chrX	211651	211705	-	0.227315	0.419871	0.905404	0.230973	0.417891	0.727866	0.0805274	0.776177	0.959258	0.241515	0.3968	0.778224	0.0995089	0.723805	0.948208
chrX:212119:-	chrX:212119:-	chrX	212119	212119	-	0.173038	0.935569	NA	-0.704318	0.770803	NA	1.07517	0.605	NA	0.972025	0.647905	NA	1.04012	0.613077	NA
chrX:212148-212154:-	chrX:212148:-	chrX	212148	212154	-	0.966399	0.426421	0.908142	0.835022	0.509278	0.791212	1.4594	0.225093	0.655925	0.764812	0.546653	NA	1.53078	0.197645	0.564569
chrX:213253:-	chrX:213253:-	chrX	213253	213253	-	1.10391	0.254479	0.772313	1.74782	0.0717654	0.301135	0.925759	0.346036	0.775225	-0.248633	0.821138	NA	0.327111	0.741457	0.948208
chrX:213342:-	chrX:213342:-	chrX	213342	213342	-	0.174975	0.917433	NA	-0.191787	0.914881	NA	0.0731013	0.965923	NA	-1.71848	0.407677	NA	0.275291	0.869036	NA
chrX:214243-214256:-	chrX:214243:-	chrX	214243	214256	-	0.0227298	0.987027	0.999564	0.152698	0.914922	0.973401	-0.971266	0.511508	0.875852	-1.67867	0.307845	NA	-0.302109	0.829668	0.954772
chrX:215065:-	chrX:215065:-	chrX	215065	215065	-	1.41648	0.431497	0.909724	1.70462	0.351318	NA	1.66683	0.35385	NA	1.41142	0.44597	NA	1.05278	0.561146	0.888664
chrX:216043:-	chrX:216043:-	chrX	216043	216043	-	0.945985	0.0523618	0.326066	1.11211	0.0248243	0.159029	0.825945	0.0931934	0.427436	-0.421654	0.435041	0.800134	0.403309	0.412862	0.795347
chrX:217313-217351:-	chrX:217325:-	chrX	217313	217351	-	0.729652	0.0239093	0.190477	0.79711	0.0147468	0.111837	0.3266	0.317349	0.752536	-0.583748	0.0889482	0.439065	-0.097566	0.765358	0.948208
chrX:217380-217383:-	chrX:217380:-	chrX	217380	217383	-	0.596857	0.444331	0.915309	1.08055	0.168566	0.476378	-0.288189	0.722136	0.944297	-0.431948	0.607094	0.882313	-0.391725	0.624506	0.922996
chrX:218513:-	chrX:218513:-	chrX	218513	218513	-	5.04792	0.332923	NA	3.86818	0.460901	NA	-0.240957	0.964394	NA	1.5723	0.770166	NA	-0.639628	0.905672	NA
chrX:219819-219830:-	chrX:219827:-	chrX	219819	219830	-	0.474982	0.587561	0.963484	0.101695	0.912039	0.972987	-0.701549	0.455364	0.850825	0.394059	0.663017	NA	-1.97786	0.052563	0.241788
chrX:220047-220055:-	chrX:220052:-	chrX	220047	220055	-	-0.102367	0.840244	0.989452	-0.521458	0.325145	0.651347	-0.528879	0.307418	0.743058	0.816905	0.105789	0.473433	-0.991772	0.0563453	0.253197
chrX:220080-220142:-	chrX:220120:-	chrX	220080	220142	-	0.263035	0.375822	0.878643	-0.312348	0.315763	0.644601	-0.265416	0.382151	0.802064	0.544797	0.0697364	0.395084	0.928367	0.00149703	0.0149971
chrX:220192-220208:-	chrX:220192:-	chrX	220192	220208	-	-0.624898	0.421624	0.906179	-1.13018	0.206053	0.527299	-0.14059	0.853349	0.974955	-0.29026	0.717432	0.921947	2.66575	9.99e-05	0.0014558
chrX:220663-220694:-	chrX:220688:-	chrX	220663	220694	-	-0.311383	0.660123	0.974101	-0.114736	0.875945	0.961164	-0.0180631	0.979534	0.996339	0.623589	0.371375	0.76388	1.77563	0.00666076	0.0506538
chrX:223532:-	chrX:223532:-	chrX	223532	223532	-	0.5584	0.701671	0.982561	0.746204	0.620922	0.853287	0.208741	0.890296	0.979732	2.90303	0.0344217	NA	0.967486	0.494417	0.850058
chrX:227054-227101:-	chrX:227098:-	chrX	227054	227101	-	-0.294677	0.2855	0.806892	-0.693745	0.017298	0.124104	-0.105333	0.702736	0.93894	0.468943	0.0884205	0.43727	0.874894	0.00106225	0.011302
chrX:227851-227865:-	chrX:227851:-	chrX	227851	227865	-	0.337822	0.811372	0.987504	-1.28381	0.495654	0.782656	1.20744	0.374888	0.796487	0.750339	0.603199	NA	3.88995	0.00226142	0.0212275
chrX:227888:-	chrX:227888:-	chrX	227888	227888	-	0.698934	0.794876	NA	-1.1422	0.692415	NA	0.806795	0.765126	NA	0.197123	0.944927	NA	3.41844	0.176137	NA
chrX:228100:-	chrX:228100:-	chrX	228100	228100	-	1.06322	0.742247	NA	0.257983	0.936842	NA	-0.240832	0.941033	NA	0.22559	0.944759	NA	5.20153	0.076426	NA
chrX:228129:-	chrX:228129:-	chrX	228129	228129	-	-0.445631	0.88279	NA	3.63935	0.186784	NA	2.20185	0.439005	NA	0.225583	0.940507	NA	3.96469	0.141985	NA
chrX:228157:-	chrX:228157:-	chrX	228157	228157	-	-1.84013	0.573184	NA	-1.13652	0.727874	NA	0.807354	0.794716	NA	-1.16892	0.720439	NA	2.97356	0.315199	NA
chrX:228206-228228:-	chrX:228228:-	chrX	228206	228228	-	2.4808	0.0867954	0.449609	2.56351	0.0822196	0.323622	1.63645	0.275448	0.713845	-0.746829	0.70217	NA	4.67407	0.000900805	0.00983698
chrX:228249-228300:-	chrX:228300:-	chrX	228249	228300	-	2.21091	0.0125238	0.121634	2.51379	0.00492672	0.0527775	2.21718	0.0126593	0.120607	-1.59499	0.231475	0.645771	2.55673	0.00355525	0.0307355
chrX:228332:-	chrX:228332:-	chrX	228332	228332	-	0.833078	0.760009	NA	-2.94673	0.332994	NA	-1.00285	0.726567	NA	-2.97912	0.327707	NA	-3.84422	0.206605	NA
chrX:228384:-	chrX:228384:-	chrX	228384	228384	-	1.67414	0.214084	0.721445	1.67652	0.223113	0.548597	1.98325	0.140074	0.525234	-3.16225	0.103493	NA	1.32083	0.328988	0.735013
chrX:228409-228529:-	chrX:228479:-	chrX	228409	228529	-	0.295036	0.545508	0.953298	0.217537	0.656069	0.869776	0.00590202	0.990356	0.998522	-0.0691178	0.887525	0.974258	-0.160476	0.742364	0.948208
chrX:230924-230927:-	chrX:230927:-	chrX	230924	230927	-	-1.99079	0.0958251	0.477056	-0.884019	0.443134	0.747398	-1.12582	0.319232	0.753045	0.932331	0.375158	NA	-4.50669	0.00844515	0.0609117
chrX:230957:-	chrX:230957:-	chrX	230957	230957	-	-0.84995	0.590593	0.963484	-4.48151	0.0306097	NA	-1.95717	0.251324	NA	0.444679	0.774115	NA	-3.896	0.0546716	0.248171
chrX:231024-231076:-	chrX:231076:-	chrX	231024	231076	-	-0.0774371	0.857778	0.98946	-0.369377	0.405202	0.718208	-0.83932	0.0582703	0.326395	0.713367	0.0981972	0.459388	-1.52387	0.000676208	0.00769256
chrX:231107:-	chrX:231107:-	chrX	231107	231107	-	-0.699373	0.568928	0.960285	-0.400577	0.74893	0.911592	-1.20216	0.345243	0.774977	-1.17445	0.371926	NA	-0.931123	0.449045	0.819808
chrX:234705:-	chrX:234705:-	chrX	234705	234705	-	1.78628	0.0728698	0.402553	2.27167	0.0235114	0.153014	2.392	0.0151907	0.135794	1.7637	0.0845994	0.429145	1.15368	0.253939	0.644131
chrX:235666:-	chrX:235666:-	chrX	235666	235666	-	4.45041	0.0567033	NA	3.39888	0.161958	NA	3.52016	0.139697	NA	3.18672	0.193199	NA	-0.639521	0.813453	NA
chrX:235729:-	chrX:235729:-	chrX	235729	235729	-	4.32417	0.0395888	NA	4.53081	0.032699	NA	2.78528	0.208352	NA	3.33413	0.130721	NA	0.768488	0.756728	NA
chrX:236289:-	chrX:236289:-	chrX	236289	236289	-	-0.896756	0.66529	NA	1.39612	0.462019	NA	-0.692659	0.738259	NA	-1.28602	0.570297	NA	0.803173	0.66938	NA
chrX:236423-236582:-	chrX:236507:-	chrX	236423	236582	-	0.164429	0.456644	0.918476	0.446535	0.0437744	0.226451	0.104997	0.635057	0.92077	0.11047	0.61885	0.888827	0.0766784	0.728363	0.948208
chrX:237000-237005:-	chrX:237005:-	chrX	237000	237005	-	-1.46321	0.496561	0.934828	-0.716279	0.738231	NA	-1.23755	0.568818	0.897643	0.378429	0.841422	NA	3.91839	0.0168303	0.104941
chrX:238641:-	chrX:238641:-	chrX	238641	238641	-	2.01684	0.35803	0.865076	2.65496	0.22713	NA	2.87947	0.18318	NA	1.93478	0.390233	NA	0.854275	0.707025	NA
chrX:239107-239156:-	chrX:239137:-	chrX	239107	239156	-	0.888035	0.00694511	0.0811104	0.0974276	0.777423	0.925061	0.661172	0.0464242	0.282929	0.425501	0.210247	0.622628	0.441837	0.181535	0.536239
chrX:241039:-	chrX:241039:-	chrX	241039	241039	-	5.59731	0.00567245	0.0703462	3.95841	0.060436	NA	3.20186	0.132434	NA	1.61374	0.505769	NA	0.769938	0.752367	0.948208
chrX:241606-241623:-	chrX:241606:-	chrX	241606	241623	-	2.87256	0.141362	0.593507	1.15296	0.594993	NA	2.8935	0.139883	NA	-1.24938	0.600485	NA	3.91148	0.0419411	0.206322
chrX:241661:-	chrX:241661:-	chrX	241661	241661	-	2.71988	0.183204	NA	0.265965	0.912976	NA	2.79065	0.173213	NA	1.08195	0.632214	NA	2.89151	0.154479	NA
chrX:245401-245409:-	chrX:245401:-	chrX	245401	245409	-	0.76502	0.586445	0.963484	1.23249	0.387016	0.705136	2.15163	0.110027	0.468081	1.46401	0.297408	NA	2.52329	0.0571557	0.25577
chrX:246165:-	chrX:246165:-	chrX	246165	246165	-	-1.46548	0.531018	NA	-1.69753	0.500518	NA	-2.16301	0.393776	NA	-3.14166	0.215738	NA	1.00091	0.638416	NA
chrX:246242-246255:-	chrX:246242:-	chrX	246242	246255	-	-0.416912	0.638206	0.969482	-0.147115	0.872578	0.960897	-0.130409	0.88241	0.979732	-0.733195	0.449417	0.808105	2.71072	0.00073219	0.0082587
chrX:246953:-	chrX:246953:-	chrX	246953	246953	-	-0.445629	0.87999	NA	2.81223	0.307548	NA	2.20186	0.426617	NA	0.225585	0.939077	NA	4.96505	0.055959	NA
chrX:250013-250046:-	chrX:250036:-	chrX	250013	250046	-	5.06179	0.00178005	0.0299655	3.56114	0.0330537	0.192984	4.73177	0.00361961	0.0514013	2.82677	0.0983424	NA	0.369355	0.846041	0.959972
chrX:254377:-	chrX:254377:-	chrX	254377	254377	-	-0.702218	0.656958	0.973417	0.166518	0.915399	NA	-0.559622	0.724274	NA	-2.46896	0.215401	NA	-0.635268	0.683941	0.946728
chrX:254434-254504:-	chrX:254487:-	chrX	254434	254504	-	0.0151433	0.961315	0.997489	-0.444532	0.15897	0.462388	-0.392744	0.210492	0.636179	-0.827643	0.00912203	0.133745	-1.01144	0.00129396	0.0133573
chrX:254806:-	chrX:254806:-	chrX	254806	254806	-	2.95746	0.119197	0.542143	2.53357	0.195537	NA	3.43186	0.069285	NA	1.04209	0.625567	NA	1.33539	0.500522	0.854397
chrX:255350:-	chrX:255350:-	chrX	255350	255350	-	4.83068	0.050683	NA	1.6695	0.55389	NA	3.20486	0.208154	NA	1.78152	0.521808	NA	-0.639514	0.821619	NA
chrX:255396:-	chrX:255396:-	chrX	255396	255396	-	5.49686	0.0101943	0.106052	3.81417	0.0870213	NA	4.20342	0.0536504	NA	0.225579	0.929853	NA	1.68331	0.477527	0.839684
chrX:256761-256807:-	chrX:256785:-	chrX	256761	256807	-	-0.0692758	0.753637	0.986786	-0.201052	0.374245	0.6943	-0.360702	0.106727	0.460062	0.266129	0.23218	0.645771	-0.237803	0.281132	0.680725
chrX:257029:-	chrX:257029:-	chrX	257029	257029	-	-1.95356	0.482053	NA	-1.24995	0.652851	NA	-0.303713	0.912929	NA	1.39655	0.584825	NA	3.87614	0.105348	NA
chrX:260755:-	chrX:260755:-	chrX	260755	260755	-	4.56617	0.0265978	0.205306	3.95791	0.0621015	NA	4.90381	0.0170393	NA	0.225583	0.927497	NA	1.80275	0.424951	0.803064
chrX:260788-260791:-	chrX:260791:-	chrX	260788	260791	-	4.73094	0.0151525	0.138076	4.61373	0.0197054	NA	4.66295	0.017136	NA	1.61791	0.490516	NA	4.00175	0.0418154	0.205925
chrX:262525:-	chrX:262525:-	chrX	262525	262525	-	0.170524	0.933406	NA	-2.82352	0.241384	NA	0.711518	0.72441	NA	0.268969	0.897782	NA	0.402384	0.841608	NA
chrX:262547-262582:-	chrX:262560:-	chrX	262547	262582	-	0.0703924	0.800806	0.987504	-0.640837	0.0239777	0.155226	-0.147937	0.597236	0.909186	-0.479021	0.0905554	0.441828	-0.31557	0.258771	0.651556
chrX:264815:-	chrX:264815:-	chrX	264815	264815	-	0.892794	0.340791	0.850913	1.17128	0.219371	0.543789	0.160738	0.869752	0.977114	-0.431446	0.687093	NA	1.11759	0.227019	0.608417
chrX:265081-265139:-	chrX:265122:-	chrX	265081	265139	-	-0.284089	0.386364	0.885592	-0.428394	0.203932	0.524633	-0.305237	0.354829	0.782041	-0.618912	0.0685767	0.392324	-0.485813	0.138667	0.458444
chrX:268240-268259:-	chrX:268240:-	chrX	268240	268259	-	1.6427	0.202794	0.704375	-0.353094	0.824771	0.944071	0.151937	0.914926	0.982778	1.20701	0.37478	NA	3.31761	0.00764355	0.0562627
chrX:268323-268325:-	chrX:268323:-	chrX	268323	268325	-	0.461684	0.673992	0.977022	-0.292193	0.810016	0.938019	-1.48099	0.261684	0.698509	0.4076	0.721525	NA	2.54916	0.0141764	0.0917668
chrX:268346-268361:-	chrX:268361:-	chrX	268346	268361	-	-0.649321	0.529092	0.947868	-1.93155	0.154604	0.455753	-1.10153	0.317902	0.752599	-0.378164	0.724072	NA	2.79274	0.00206844	0.0197592
chrX:268405-268438:-	chrX:268405:-	chrX	268405	268438	-	-1.44219	0.0452325	0.29488	-1.71739	0.0352894	0.201103	-1.01	0.151769	0.547901	-0.48971	0.485106	0.826163	2.72801	8.21e-06	0.000157429
chrX:270949:-	chrX:270949:-	chrX	270949	270949	-	3.11558	0.18083	NA	0.267429	0.920761	NA	2.38492	0.312892	NA	1.0523	0.67861	NA	-2.04351	0.450062	NA
chrX:272498-272622:-	chrX:272610:-	chrX	272498	272622	-	0.0989788	0.719296	0.98496	0.00821256	0.976539	0.992044	0.0295872	0.914777	0.982778	-0.0651742	0.815744	0.955074	0.0463433	0.866141	0.965721
chrX:275567:-	chrX:275567:-	chrX	275567	275567	-	4.90091	0.0125323	0.121643	4.86166	0.0143992	NA	4.78683	0.0151814	NA	1.61701	0.493753	NA	-0.639513	0.790497	0.948208
chrX:275695:-	chrX:275695:-	chrX	275695	275695	-	5.48597	0.00369131	0.0517874	4.49552	0.0207269	NA	4.00997	0.0390115	NA	3.95631	0.0453149	NA	-0.639516	0.786196	0.948208
chrX:275717-275734:-	chrX:275734:-	chrX	275717	275734	-	4.96145	5.41e-07	3.98e-05	4.355	1.4e-05	0.000643774	4.28247	1.75e-05	0.000829952	1.94678	0.0725783	0.400367	-1.2163	0.390258	0.780808
chrX:275756:-	chrX:275756:-	chrX	275756	275756	-	5.24414	0.0118651	0.117208	4.29017	0.0450158	NA	3.20442	0.14162	NA	3.04236	0.175375	NA	-0.639516	0.799122	0.948208
chrX:278012:-	chrX:278012:-	chrX	278012	278012	-	0.665714	0.523593	0.945608	0.759616	0.478001	0.7721	0.40755	0.701415	0.938875	-0.34679	0.763476	NA	-1.45615	0.217029	0.594128
chrX:278112-278154:-	chrX:278115:-	chrX	278112	278154	-	0.349233	0.31847	0.835489	0.384952	0.27742	0.609009	0.0300599	0.932189	0.985358	-0.737779	0.0447647	0.316322	-1.08535	0.00257972	0.0236106
chrX:280631-280719:-	chrX:280670:-	chrX	280631	280719	-	-0.273419	0.372727	0.876435	-0.273623	0.389237	0.706631	-0.0882769	0.773645	0.957983	-0.859494	0.00937237	0.136017	3.04008	1.01e-25	2.48e-23
chrX:280835-280847:-	chrX:280838:-	chrX	280835	280847	-	-0.505837	0.632649	0.968675	-1.69202	0.187148	0.503259	-0.257955	0.806904	0.968314	0.669253	0.516454	NA	0.64291	0.52072	0.866246
chrX:280993:-	chrX:280993:-	chrX	280993	280993	-	-0.32504	0.890528	NA	-2.61548	0.32102	NA	-1.67312	0.525419	NA	1.41061	0.536653	NA	0.112549	0.961107	NA
chrX:281023:-	chrX:281023:-	chrX	281023	281023	-	-1.26343	0.55888	NA	0.15101	0.941559	NA	-0.381909	0.853161	NA	0.895304	0.653075	NA	-0.146217	0.941826	NA
chrX:283439-283443:-	chrX:283443:-	chrX	283439	283443	-	3.37578	0.0707726	0.395376	2.24002	0.255267	NA	3.69233	0.0477385	NA	2.77177	0.149935	NA	-2.05552	0.37733	0.77331
chrX:283495:-	chrX:283495:-	chrX	283495	283495	-	1.27729	0.482077	NA	-1.40151	0.534212	NA	0.933676	0.612329	NA	-0.404799	0.84227	NA	-2.30989	0.303841	NA
chrX:283984-284000:-	chrX:284000:-	chrX	283984	284000	-	3.73064	0.00579923	0.071286	2.77038	0.0477598	0.237969	3.21325	0.0186975	0.157139	2.61812	0.0625585	NA	-0.0254961	0.987067	0.996221
chrX:284230-284255:-	chrX:284255:-	chrX	284230	284255	-	5.51315	0.000282949	0.00713559	5.41349	0.000391623	0.00879912	5.48521	0.000309102	0.00826453	4.03433	0.0095228	0.136907	2.78805	0.0758063	0.31038
chrX:284399:-	chrX:284399:-	chrX	284399	284399	-	0.440555	0.750813	0.986786	0.546061	0.702372	NA	-0.221155	0.879055	NA	0.213795	0.883372	NA	0.288342	0.835104	0.956614
chrX:285022:-	chrX:285022:-	chrX	285022	285022	-	2.11682	0.264502	0.783226	2.82079	0.137044	NA	2.90351	0.119789	NA	1.72624	0.386537	NA	2.93077	0.11331	0.403334
chrX:285265-285373:-	chrX:285284:-	chrX	285265	285373	-	-0.429464	0.0307948	0.227362	-0.528553	0.00877925	0.0787932	-0.563329	0.00482015	0.0629857	-0.206627	0.30239	0.707447	-0.176785	0.371556	0.769594
chrX:285724:-	chrX:285724:-	chrX	285724	285724	-	0.173174	0.877022	0.990025	0.0536718	0.963228	0.988649	-0.998876	0.409302	0.820757	-0.525063	0.664448	NA	0.378149	0.732128	0.948208
chrX:285838-285841:-	chrX:285838:-	chrX	285838	285841	-	0.349292	0.675731	0.977623	1.30358	0.115029	0.389561	1.06297	0.194942	0.616072	0.354254	0.681792	0.911707	0.226566	0.785585	0.948208
chrX:285944:-	chrX:285944:-	chrX	285944	285944	-	4.45047	0.0973578	NA	2.81505	0.318996	NA	3.51987	0.196697	NA	0.225579	0.940382	NA	-0.639518	0.832084	NA
chrX:286136-286161:-	chrX:286161:-	chrX	286136	286161	-	2.15768	0.00623925	0.0748345	2.27831	0.00452891	0.0497564	2.13948	0.00700873	0.080917	1.80279	0.027418	0.248174	0.600227	0.47025	0.834671
chrX:286247:-	chrX:286247:-	chrX	286247	286247	-	0.51242	0.819925	NA	2.59256	0.216208	NA	2.5974	0.20874	NA	2.15203	0.312313	NA	1.92939	0.353967	NA
chrX:286411-286430:-	chrX:286411:-	chrX	286411	286430	-	-0.373739	0.77829	0.987504	0.270571	0.839045	0.949568	-0.187663	0.887681	0.979732	-0.323004	0.815735	NA	0.231512	0.85644	0.963359
chrX:286478:-	chrX:286478:-	chrX	286478	286478	-	0.350137	0.751601	0.986786	1.81117	0.0918788	0.344195	-0.482008	0.683854	0.934663	-0.682544	0.589704	NA	0.54293	0.617851	0.92002
chrX:286968:-	chrX:286968:-	chrX	286968	286968	-	-0.462107	0.626139	0.966551	0.670528	0.471216	0.7675	-0.662305	0.494974	0.867923	-0.195698	0.840324	NA	-0.677399	0.475713	0.838487
chrX:287035-287036:-	chrX:287036:-	chrX	287035	287036	-	1.64056	0.332341	0.845277	1.62023	0.347438	NA	1.01627	0.556959	NA	-1.37557	0.519855	NA	-0.73106	0.694142	0.948208
chrX:287532:-	chrX:287532:-	chrX	287532	287532	-	0.853356	0.697404	NA	0.728011	0.748235	NA	1.07388	0.624409	NA	-0.843906	0.736222	NA	-1.68464	0.503678	NA
chrX:287977:-	chrX:287977:-	chrX	287977	287977	-	1.52143	0.523017	NA	-0.692127	0.79836	NA	1.06929	0.657762	NA	-2.22251	0.416718	NA	-0.489231	0.846022	NA
chrX:288555-288570:-	chrX:288570:-	chrX	288555	288570	-	2.2165	0.0162349	0.144994	1.97469	0.0368865	0.205691	0.993801	0.303274	0.739823	0.747624	0.458166	0.811718	0.825711	0.387567	0.779513
chrX:288626:-	chrX:288626:-	chrX	288626	288626	-	3.82796	0.113206	NA	4.24667	0.08053	NA	2.20659	0.389818	NA	2.45221	0.345678	NA	1.66517	0.519863	NA
chrX:289238:-	chrX:289238:-	chrX	289238	289238	-	0.943525	0.646197	NA	-1.21218	0.618327	NA	1.12428	0.584554	NA	-1.28047	0.595341	NA	-2.12153	0.381758	NA
chrX:289315:-	chrX:289315:-	chrX	289315	289315	-	0.653279	0.739546	NA	1.28226	0.514906	NA	-0.381923	0.853176	NA	-1.41627	0.540338	NA	-2.4103	0.304899	NA
chrX:289374-289497:-	chrX:289427:-	chrX	289374	289497	-	0.537656	0.0407451	0.275153	0.705446	0.00732627	0.0695794	0.402785	0.125558	0.499402	-0.306812	0.245226	0.657128	-0.683779	0.00944855	0.0667448
chrX:290257:-	chrX:290257:-	chrX	290257	290257	-	-1.9783	0.240975	NA	-0.322041	0.838772	NA	-1.33086	0.414427	NA	-2.91861	0.145037	NA	-1.72445	0.290286	NA
chrX:290724:-	chrX:290724:-	chrX	290724	290724	-	-0.437524	0.617457	0.966091	-0.768686	0.410881	0.722292	-0.686244	0.444245	0.843822	0.710325	0.408908	0.786812	0.256792	0.762315	0.948208
chrX:290774:-	chrX:290774:-	chrX	290774	290774	-	0.276468	0.865019	0.98946	-0.679737	0.710582	NA	-1.17784	0.520228	NA	1.44585	0.365449	NA	0.0160945	0.992129	0.997745
chrX:290877:-	chrX:290877:-	chrX	290877	290877	-	0.730542	0.679729	NA	-0.409104	0.830861	NA	0.192901	0.91505	NA	-1.11625	0.581974	NA	-1.78931	0.368805	NA
chrX:290926-290961:-	chrX:290938:-	chrX	290926	290961	-	0.20253	0.444987	0.915601	0.482857	0.0692551	0.295241	-0.166456	0.531513	0.88327	-0.524833	0.050373	0.338804	-0.366538	0.167758	0.513614
chrX:290994-291022:-	chrX:290994:-	chrX	290994	291022	-	0.217502	0.719367	0.98496	0.332088	0.594233	0.838644	-0.235835	0.70632	0.940231	0.331567	0.594362	0.876554	0.20507	0.733005	0.948208
chrX:291054-291056:-	chrX:291054:-	chrX	291054	291056	-	0.326973	0.761327	0.987071	0.184879	0.869452	0.959757	-0.844669	0.470797	0.857976	0.46983	0.67052	NA	0.649911	0.538956	0.876059
chrX:291749:-	chrX:291749:-	chrX	291749	291749	-	-1.41945	0.376875	0.87935	-0.948708	0.562046	NA	-0.126709	0.933209	0.985522	0.750845	0.614693	NA	-0.982576	0.524612	0.86791
chrX:291779-291782:-	chrX:291779:-	chrX	291779	291782	-	-0.196756	0.815015	0.987504	-0.268623	0.759639	0.917019	-0.283106	0.739863	0.947742	0.298389	0.725083	0.923445	0.106288	0.897549	0.973573
chrX:292938:-	chrX:292938:-	chrX	292938	292938	-	0.511252	0.564564	0.959389	0.0979161	0.915527	0.973401	-0.434756	0.638165	0.922099	-1.11696	0.265019	0.676128	-0.689007	0.453173	0.822146
chrX:293502:-	chrX:293502:-	chrX	293502	293502	-	1.28264	0.251789	0.769656	-4.08781	0.0233534	0.15237	1.02734	0.364581	0.789492	-0.391143	0.756803	NA	1.18454	0.288922	0.689636
chrX:293525-293529:-	chrX:293525:-	chrX	293525	293529	-	0.652772	0.482186	0.928039	-3.68523	0.0269499	0.168349	0.0791735	0.933786	0.985679	-1.41918	0.199591	NA	0.175899	0.851002	0.961672
chrX:294015:-	chrX:294015:-	chrX	294015	294015	-	0.704305	0.800294	NA	2.17236	0.423088	NA	2.11868	0.429789	NA	1.28698	0.645421	NA	0.818895	0.765956	NA
chrX:294040-294103:-	chrX:294054:-	chrX	294040	294103	-	0.449494	0.0846187	0.442039	1.0006	0.00012798	0.00375422	0.123812	0.637687	0.921982	-0.292903	0.276762	0.690138	-0.18595	0.478762	0.840423
chrX:294242:-	chrX:294242:-	chrX	294242	294242	-	0.962958	0.766295	NA	0.257975	0.936778	NA	2.20185	0.475851	NA	0.225582	0.944703	NA	4.46952	0.128855	NA
chrX:294277-294329:-	chrX:294315:-	chrX	294277	294329	-	-0.844115	0.200118	0.700182	-1.9216	0.0245264	0.157782	-0.922241	0.174165	0.586795	-0.349447	0.60223	0.880537	3.47438	6.96e-10	2.75e-08
chrX:294946:-	chrX:294946:-	chrX	294946	294946	-	0.259281	0.883156	NA	-2.06761	0.345661	NA	-0.601648	0.743594	NA	-1.13162	0.566809	NA	-0.506752	0.778133	NA
chrX:300131:-	chrX:300131:-	chrX	300131	300131	-	4.6302	0.0389117	NA	1.73976	0.504677	NA	4.52379	0.0444587	NA	1.60624	0.536046	NA	1.6761	0.493677	NA
chrX:300199:-	chrX:300199:-	chrX	300199	300199	-	4.84719	0.0208684	0.172546	3.64927	0.095682	NA	4.78683	0.0229522	NA	1.61129	0.515232	NA	-0.639514	0.799479	0.948208
chrX:300224:-	chrX:300224:-	chrX	300224	300224	-	0.88754	0.414008	0.901793	1.00493	0.367439	0.688097	0.354166	0.752719	0.950942	0.557292	0.625909	NA	1.42764	0.179459	0.532715
chrX:300393:-	chrX:300393:-	chrX	300393	300393	-	3.79177	0.0963801	NA	4.05201	0.0786512	NA	4.20186	0.0643484	NA	1.7543	0.49742	NA	-0.639515	0.80875	NA
chrX:300448:-	chrX:300448:-	chrX	300448	300448	-	4.45043	0.0657911	NA	3.25086	0.197836	NA	2.78499	0.269265	NA	1.77429	0.51523	NA	-0.639515	0.818213	NA
chrX:300537:-	chrX:300537:-	chrX	300537	300537	-	4.1855	0.0467618	NA	3.95677	0.066179	NA	4.37248	0.0378202	NA	2.66868	0.243788	NA	0.768524	0.756618	NA
chrX:300615-300624:-	chrX:300620:-	chrX	300615	300624	-	3.54965	0.0108884	0.110666	2.43836	0.0936401	0.347662	3.07139	0.029237	0.209852	2.48327	0.0869235	NA	0.724588	0.632625	0.927493
chrX:300688:-	chrX:300688:-	chrX	300688	300688	-	2.80789	0.195287	NA	1.83212	0.420202	NA	1.29435	0.56968	NA	0.116899	0.963048	NA	0.314258	0.893685	NA
chrX:300714:-	chrX:300714:-	chrX	300714	300714	-	4.63035	0.0377054	NA	4.60545	0.0409315	NA	3.52262	0.122875	NA	1.75136	0.494836	NA	-0.639517	0.807346	NA
chrX:301578:-	chrX:301578:-	chrX	301578	301578	-	3.97033	0.090522	NA	4.24718	0.0725274	NA	4.01013	0.0882303	NA	0.225586	0.933538	NA	-0.639513	0.813111	NA
chrX:301611:-	chrX:301611:-	chrX	301611	301611	-	5.4626	0.00511079	0.0654001	4.67475	0.0190766	NA	4.20186	0.034998	NA	1.61703	0.49368	NA	-0.639513	0.790467	0.948208
chrX:301812-301826:-	chrX:301812:-	chrX	301812	301826	-	1.81249	0.151527	0.613308	1.1667	0.376272	0.695992	0.828826	0.526641	0.881946	-0.207207	0.886148	NA	-0.348807	0.798324	0.948208
chrX:301861-301877:-	chrX:301877:-	chrX	301861	301877	-	5.66173	0.00327269	0.0473543	4.289	0.0313676	NA	4.66185	0.0169684	0.147003	1.71346	0.462105	NA	-0.639513	0.788899	0.948208
chrX:302215:-	chrX:302215:-	chrX	302215	302215	-	4.80956	0.0126349	0.122084	5.00245	0.0101059	NA	4.20185	0.0318059	NA	2.51332	0.24742	NA	2.42765	0.238742	0.624903
chrX:302850-302919:-	chrX:302866:-	chrX	302850	302919	-	0.154546	0.673393	0.977022	-0.194478	0.601903	0.843738	-0.105296	0.775259	0.958912	0.377835	0.305748	0.711093	-0.352623	0.33808	0.742901
chrX:304499-304505:-	chrX:304505:-	chrX	304499	304505	-	3.02305	0.0179857	0.155378	1.90797	0.153687	0.453983	2.39699	0.0644436	0.347524	-0.292749	0.854177	NA	-0.250032	0.862727	0.964539
chrX:304852:-	chrX:304852:-	chrX	304852	304852	-	4.49864	0.0553874	NA	3.17528	0.197829	NA	2.20185	0.382984	NA	3.69071	0.127016	NA	-0.639517	0.814268	NA
chrX:304924:-	chrX:304924:-	chrX	304924	304924	-	3.75373	0.136534	NA	3.64166	0.156069	NA	2.78869	0.282768	NA	2.90936	0.269372	NA	-0.639521	0.822521	NA
chrX:305032:-	chrX:305032:-	chrX	305032	305032	-	4.32595	0.185793	NA	0.257966	0.94198	NA	2.19574	0.517797	NA	0.225574	0.949255	NA	0.749079	0.831839	NA
chrX:305073:-	chrX:305073:-	chrX	305073	305073	-	3.37105	0.14429	NA	0.340466	0.898452	NA	2.38048	0.311238	NA	0.198925	0.940324	NA	-2.04377	0.448148	NA
chrX:305102-305116:-	chrX:305102:-	chrX	305102	305116	-	4.10791	0.0255169	0.19931	3.09065	0.10252	NA	2.73192	0.147402	0.538905	1.72505	0.389459	NA	-0.693932	0.761731	0.948208
chrX:305673-305698:-	chrX:305683:-	chrX	305673	305698	-	-0.0814537	0.89424	0.991867	-0.331104	0.608357	0.847551	-0.0515337	0.93347	0.98554	-0.854973	0.203953	0.61547	-0.454367	0.461962	0.828821
chrX:305862-305942:-	chrX:305899:-	chrX	305862	305942	-	-0.678068	0.00905256	0.0978076	-0.688767	0.00938575	0.0827673	-0.531287	0.041091	0.261485	0.339132	0.188885	0.598072	0.0522413	0.838169	0.957575
chrX:306745:-	chrX:306745:-	chrX	306745	306745	-	1.79982	0.442557	NA	2.26487	0.337223	NA	3.15705	0.168669	NA	-1.27433	0.633712	NA	-2.13942	0.423714	NA
chrX:307574-307601:-	chrX:307574:-	chrX	307574	307601	-	5.6895	0.000225964	0.00597447	4.82389	0.00200559	0.0284769	5.36945	0.000518037	0.0121134	2.20335	0.193438	0.603616	-2.08599	0.32173	0.727657
chrX:307628:-	chrX:307628:-	chrX	307628	307628	-	3.52418	0.0756461	0.411301	2.98122	0.141591	NA	2.53131	0.211384	NA	1.35834	0.532311	NA	-2.11824	0.382627	0.77569
chrX:307669-307685:-	chrX:307669:-	chrX	307669	307685	-	5.65199	0.00207012	0.0337221	4.9547	0.00811753	0.0748722	5.2897	0.00415929	0.0565974	2.65658	0.201468	NA	-0.639516	0.782488	0.948208
chrX:308132:-	chrX:308132:-	chrX	308132	308132	-	0.312851	0.841819	0.98946	0.778378	0.623228	NA	0.502309	0.748766	NA	-1.89429	0.345569	NA	0.258274	0.868445	0.966258
chrX:308282:-	chrX:308282:-	chrX	308282	308282	-	5.75254	0.000834885	0.0166768	6.0405	0.000477583	0.0101354	5.84345	0.000698161	0.0152423	3.88396	0.0334287	NA	-0.639519	0.774187	0.948208
chrX:308379-308448:-	chrX:308429:-	chrX	308379	308448	-	5.70835	1.01e-28	1.1e-25	5.21456	5.52e-24	5.69e-21	5.54846	3.64e-27	5.11e-24	2.40416	1.06e-05	0.0010241	0.347093	0.554297	0.885249
chrX:308649:-	chrX:308649:-	chrX	308649	308649	-	3.24524	0.254413	NA	4.29252	0.129468	NA	2.78071	0.336329	NA	0.225578	0.942407	NA	-0.63952	0.837717	NA
chrX:308689:-	chrX:308689:-	chrX	308689	308689	-	5.11188	0.0171628	0.150774	4.76977	0.0282839	NA	4.19873	0.0538115	NA	0.225585	0.929824	NA	-0.639514	0.802851	0.948208
chrX:310184:-	chrX:310184:-	chrX	310184	310184	-	0.894183	0.56118	0.958304	1.04606	0.5055	NA	-0.598726	0.722779	NA	1.45955	0.344857	NA	-0.951704	0.571411	0.894466
chrX:310633-310730:-	chrX:310683:-	chrX	310633	310730	-	-0.0725586	0.791343	0.987504	-0.280573	0.316021	0.644873	-0.552512	0.0469239	0.284997	-0.213986	0.44347	0.805749	-1.23776	1.01e-05	0.000191419
chrX:311043-311044:-	chrX:311043:-	chrX	311043	311044	-	0.282834	0.840148	0.989409	0.665749	0.640484	0.861881	1.6809	0.212383	0.63862	0.734654	0.604532	NA	0.917215	0.500236	0.854194
chrX:312075:-	chrX:312075:-	chrX	312075	312075	-	0.484746	0.707723	0.984303	1.16521	0.368017	0.688573	0.827334	0.519575	0.879709	0.101325	0.941681	NA	1.87844	0.127497	0.434207
chrX:312686-312761:-	chrX:312728:-	chrX	312686	312761	-	0.0453656	0.86255	0.98946	0.268145	0.309676	0.639975	0.182809	0.485742	0.863715	0.575109	0.0285467	0.253307	0.545865	0.0359131	0.185211
chrX:313512:-	chrX:313512:-	chrX	313512	313512	-	-2.1181	0.406982	NA	-0.27994	0.904964	NA	-1.88577	0.463105	NA	0.437538	0.846567	NA	0.671101	0.75935	NA
chrX:313649:-	chrX:313649:-	chrX	313649	313649	-	-0.668506	0.798312	NA	-3.2826	0.256132	NA	-3.78141	0.190825	NA	-3.31499	0.25147	NA	0.470227	0.853696	NA
chrX:313903-314001:-	chrX:313936:-	chrX	313903	314001	-	-0.216091	0.238693	0.754191	-0.573594	0.001958	0.0280484	-0.45241	0.0139392	0.128485	-0.0506907	0.783126	0.945577	-0.858567	3.08e-06	6.48e-05
chrX:314375:-	chrX:314375:-	chrX	314375	314375	-	-0.472123	0.817359	NA	0.115386	0.955214	NA	-0.740238	0.723308	NA	-1.92542	0.414195	NA	-4.16833	0.0824203	NA
chrX:314851-314925:-	chrX:314910:-	chrX	314851	314925	-	-0.283629	0.238631	0.754191	-0.45893	0.0593211	0.271061	-0.735265	0.00242936	0.0390464	-0.219208	0.365933	0.759315	-1.01181	2.93e-05	0.000496554
chrX:314993-315001:-	chrX:315001:-	chrX	314993	315001	-	-0.952635	0.366759	0.871746	-0.899134	0.41147	0.722757	-1.09615	0.307571	0.743193	-0.832707	0.444264	NA	-2.20441	0.0508793	0.236096
chrX:315047:-	chrX:315047:-	chrX	315047	315047	-	-0.193202	0.891615	0.991483	-2.30448	0.230346	NA	-0.462925	0.750903	NA	0.701892	0.617036	NA	-0.174819	0.900882	0.97459
chrX:315548-315630:-	chrX:315591:-	chrX	315548	315630	-	-0.443634	0.0466479	0.301646	-0.290714	0.198684	0.517797	-0.167073	0.452977	0.849815	0.1162	0.603418	0.880977	-0.0635072	0.773571	0.948208
chrX:316470-316532:-	chrX:316514:-	chrX	316470	316532	-	-0.16485	0.414503	0.90211	-0.234492	0.249609	0.579672	-0.413969	0.0412946	0.262497	-0.117156	0.564546	0.862664	-0.568655	0.00496203	0.0401584
chrX:317109-317160:-	chrX:317147:-	chrX	317109	317160	-	0.316292	0.623854	0.966353	0.7594	0.247269	0.576895	1.11901	0.0733422	0.37468	1.6111	0.00990178	0.140351	3.22194	5.11e-08	1.52e-06
chrX:317255-317349:-	chrX:317305:-	chrX	317255	317349	-	-1.30911	0.000401368	0.00938751	-2.10547	7.06e-07	5.39e-05	-0.825907	0.0233227	0.180797	-0.370094	0.310195	0.715374	1.24556	0.00026391	0.00340976
chrX:317460:-	chrX:317460:-	chrX	317460	317460	-	0.0358692	0.982452	0.998821	-0.256875	0.882337	NA	-1.30802	0.474288	NA	0.343789	0.836197	NA	0.790364	0.616397	0.919535
chrX:319762-319824:-	chrX:319777:-	chrX	319762	319824	-	0.265347	0.357561	0.864453	0.501892	0.0863403	0.333194	0.479777	0.0960807	0.43508	0.0305651	0.918363	0.979426	2.14604	1.72e-14	1.29e-12
chrX:322607:-	chrX:322607:-	chrX	322607	322607	-	3.70029	0.0791359	NA	0.186788	0.940741	NA	0.709648	0.759447	NA	0.254661	0.917992	NA	1.90974	0.377065	NA
chrX:323126-323159:-	chrX:323137:-	chrX	323126	323159	-	0.216712	0.612197	0.966063	-0.429044	0.356017	0.678183	0.167879	0.697727	0.938875	-0.638683	0.176468	0.581257	2.60049	1.49e-10	6.48e-09
chrX:324262:-	chrX:324262:-	chrX	324262	324262	-	1.68555	0.38979	NA	1.31663	0.515725	NA	1.0807	0.589846	NA	-0.836317	0.720924	NA	-3.08375	0.195876	NA
chrX:324666:-	chrX:324666:-	chrX	324666	324666	-	1.6312	0.23871	0.754191	1.31802	0.357075	NA	0.988575	0.486575	0.863715	0.285925	0.850727	NA	-2.61031	0.176477	0.528584
chrX:324735-324739:-	chrX:324737:-	chrX	324735	324739	-	0.0376565	0.977973	0.998579	1.49256	0.245153	0.574333	2.33223	0.0537641	0.309976	-0.23069	0.879705	0.972962	4.65292	6.55e-05	0.00100116
chrX:324773:-	chrX:324773:-	chrX	324773	324773	-	1.92339	0.319885	0.836822	1.21923	0.561758	0.821162	2.11052	0.275355	0.713845	0.204079	0.928653	NA	4.84257	0.00839928	0.060671
chrX:325193:-	chrX:325193:-	chrX	325193	325193	-	-0.94848	0.231437	0.745199	-1.34321	0.121029	0.399737	-0.321345	0.678443	0.933652	0.0228571	0.976634	0.993571	-0.537596	0.484622	0.843879
chrX:325214:-	chrX:325214:-	chrX	325214	325214	-	-1.46975	0.284508	0.806175	-0.805952	0.558514	NA	-0.982211	0.46541	0.855884	-0.0859343	0.947826	NA	-1.96748	0.162548	0.5043
chrX:326926:-	chrX:326926:-	chrX	326926	326926	-	4.40097	0.0599769	NA	1.67172	0.535132	NA	3.78474	0.110516	NA	3.35231	0.168731	NA	-0.639516	0.813622	NA
chrX:327693:-	chrX:327693:-	chrX	327693	327693	-	0.396773	0.769519	0.987504	-0.105874	0.941561	0.981727	0.868641	0.51741	0.878622	0.096507	0.945883	NA	-0.437342	0.753662	0.948208
chrX:327893-327940:-	chrX:327940:-	chrX	327893	327940	-	-0.293972	0.414173	0.901866	-0.267593	0.471187	0.7675	-0.365357	0.315494	0.750903	-0.323947	0.384039	0.770751	-0.0330357	0.92582	0.980556
chrX:328368:-	chrX:328368:-	chrX	328368	328368	-	-0.344476	0.860287	NA	1.67042	0.365533	NA	1.11305	0.547178	NA	-0.416546	0.840917	NA	-1.2128	0.556419	NA
chrX:328402:-	chrX:328402:-	chrX	328402	328402	-	3.39862	0.199932	NA	1.75759	0.548168	NA	4.00632	0.12813	NA	0.225578	0.939097	NA	1.80969	0.513636	NA
chrX:328441-328450:-	chrX:328441:-	chrX	328441	328450	-	2.26451	0.00146982	0.0255979	1.65067	0.0261542	0.16541	2.23258	0.00180893	0.0316825	0.106853	0.897311	0.976891	0.994576	0.175816	0.527348
chrX:328653:-	chrX:328653:-	chrX	328653	328653	-	2.74251	0.0702582	0.39351	0.284163	0.868531	0.959757	2.18982	0.153287	0.550697	-1.20873	0.546574	NA	0.296029	0.854481	0.9624
chrX:328940:-	chrX:328940:-	chrX	328940	328940	-	0.191762	0.909793	NA	1.18229	0.478786	NA	-0.283316	0.872666	NA	0.985152	0.558352	NA	-0.720578	0.684481	NA
chrX:329108-329156:-	chrX:329108:-	chrX	329108	329156	-	1.01865	0.0815023	0.431539	0.330884	0.595536	0.839442	0.401966	0.50517	0.87431	-0.619375	0.358509	0.75457	0.882177	0.13082	0.441843
chrX:329181-329191:-	chrX:329181:-	chrX	329181	329191	-	1.70689	0.10262	0.498549	1.22584	0.261717	0.591548	0.634416	0.563203	0.894661	-0.827831	0.528796	NA	1.19686	0.256598	0.648106
chrX:330110-330227:-	chrX:330187:-	chrX	330110	330227	-	-0.0582739	0.820682	0.988315	-0.913713	0.000690834	0.0132637	-0.712612	0.00657466	0.0779302	0.135537	0.601814	0.8804	-0.783741	0.00257258	0.0235521
chrX:330321:-	chrX:330321:-	chrX	330321	330321	-	-3.9764	0.105693	NA	-1.78342	0.46269	NA	-3.77161	0.124898	NA	0.0209404	0.992152	NA	0.608044	0.765823	NA
chrX:331732:-	chrX:331732:-	chrX	331732	331732	-	3.86697	0.159887	NA	1.6663	0.584328	NA	4.20013	0.126237	NA	0.225583	0.94124	NA	-0.639515	0.834472	NA
chrX:331759:-	chrX:331759:-	chrX	331759	331759	-	3.97556	0.0387793	0.266381	3.19972	0.103901	NA	2.53515	0.199396	NA	-1.24928	0.60037	NA	-2.11438	0.375275	0.771912
chrX:333081-333087:-	chrX:333081:-	chrX	333081	333087	-	1.42557	0.181774	0.670728	1.64575	0.128548	0.412314	1.21767	0.259597	0.696115	0.546608	0.631579	NA	0.804264	0.456868	0.825454
chrX:333131-333155:-	chrX:333131:-	chrX	333131	333155	-	0.199618	0.768528	0.987504	0.103896	0.882089	0.963409	0.240146	0.724686	0.944738	-0.28617	0.68908	0.913012	-0.40462	0.556672	0.886378
chrX:334108-334112:-	chrX:334108:-	chrX	334108	334112	-	-1.05429	0.332152	0.845165	-1.26865	0.28161	0.612821	-0.102176	0.921948	0.983856	-1.62759	0.183499	NA	0.832567	0.406122	0.79142
chrX:335432:-	chrX:335432:-	chrX	335432	335432	-	2.68414	0.253619	NA	2.26273	0.347375	NA	0.698619	0.781428	NA	-1.27765	0.638147	NA	0.44224	0.859539	NA
chrX:335533-335541:-	chrX:335533:-	chrX	335533	335541	-	3.38207	0.0157469	0.141834	1.50571	0.322057	0.649005	3.28889	0.0193482	0.16028	0.259056	0.878191	NA	2.53246	0.0735341	0.303846
chrX:335564-335576:-	chrX:335568:-	chrX	335564	335576	-	2.73643	0.000348119	0.00842248	0.879773	0.297418	0.629231	2.0133	0.00987044	0.102506	-0.343558	0.718162	0.921947	2.83952	0.000194186	0.00260716
chrX:335609-335627:-	chrX:335627:-	chrX	335609	335627	-	2.49859	0.00393282	0.054178	2.0656	0.0206749	0.140438	1.94318	0.0275243	0.202149	0.11834	0.907106	0.979426	2.78295	0.00121717	0.0126753
chrX:335650-335656:-	chrX:335650:-	chrX	335650	335656	-	3.55009	0.0778283	0.418856	3.96156	0.0513244	NA	4.52258	0.0221144	NA	0.22558	0.925237	NA	5.2764	0.00673724	0.0511501
chrX:337117-337173:-	chrX:337162:-	chrX	337117	337173	-	1.89142	0.00914508	0.0984502	1.68491	0.0240778	0.155717	1.87036	0.0103705	0.105959	0.404886	0.615389	0.887412	1.81104	0.0123536	0.0822724
chrX:337264:-	chrX:337264:-	chrX	337264	337264	-	1.05644	0.650505	NA	0.178458	0.945094	NA	-0.290888	0.91119	NA	1.8525	0.424674	NA	2.87357	0.19445	NA
chrX:337480:-	chrX:337480:-	chrX	337480	337480	-	-1.07178	0.611379	NA	-1.24799	0.587387	NA	0.541234	0.780209	NA	-2.76043	0.236085	NA	1.93178	0.299584	NA
chrX:337530-337546:-	chrX:337536:-	chrX	337530	337546	-	-1.01388	0.0845791	0.441902	-1.21263	0.0516207	0.250337	-0.968335	0.102252	0.449037	-1.46683	0.0209593	0.216767	0.536601	0.336084	0.741234
chrX:337641-337651:-	chrX:337641:-	chrX	337641	337651	-	1.43592	0.439766	0.914173	0.257948	0.899977	NA	0.761587	0.69178	NA	-2.21724	0.333314	NA	2.92532	0.105188	0.386019
chrX:337686:-	chrX:337686:-	chrX	337686	337686	-	1.88729	0.536675	NA	0.257972	0.935892	NA	-0.240844	0.94014	NA	2.68975	0.376377	NA	4.36807	0.131383	NA
chrX:337721:-	chrX:337721:-	chrX	337721	337721	-	1.09038	0.792013	NA	0.257962	0.950492	NA	-0.240852	0.953772	NA	0.225569	0.956703	NA	4.09754	0.296342	NA
chrX:337753-337761:-	chrX:337753:-	chrX	337753	337761	-	-0.605704	0.688709	0.980463	-2.30463	0.241287	NA	-0.197836	0.894673	NA	-3.75907	0.0591277	NA	1.61086	0.25012	0.639377
chrX:341628-341630:-	chrX:341630:-	chrX	341628	341630	-	2.28691	0.145819	0.602533	0.285121	0.871258	NA	1.09503	0.501648	NA	-0.0954444	0.958059	NA	1.5567	0.327154	0.733035
chrX:342166-342176:-	chrX:342176:-	chrX	342166	342176	-	1.26281	0.0983205	0.484416	1.63281	0.0346959	0.199161	1.01547	0.19114	0.610984	-0.368373	0.679627	0.910969	1.61253	0.0321804	0.171023
chrX:342212-342236:-	chrX:342228:-	chrX	342212	342236	-	0.19948	0.699655	0.98254	-0.0535421	0.921591	0.975749	0.303986	0.558144	0.89226	-1.59193	0.0121237	0.156402	0.801317	0.112248	0.401172
chrX:342267:-	chrX:342267:-	chrX	342267	342267	-	-0.0728059	0.963862	0.997489	-0.611694	0.7228	NA	-0.402756	0.806721	NA	-3.70413	0.0766072	NA	0.501959	0.749154	0.948208
chrX:345733-345761:-	chrX:345751:-	chrX	345733	345761	-	2.19335	0.010803	0.110111	1.78442	0.0455659	0.231968	2.66698	0.00182653	0.0319488	-0.979775	0.40314	0.782838	3.04362	0.000320839	0.00405976
chrX:347677:-	chrX:347677:-	chrX	347677	347677	-	4.18696	0.0697013	NA	2.60692	0.295544	NA	4.0083	0.0844573	NA	0.225578	0.932913	NA	3.09956	0.187322	NA
chrX:347827-347830:-	chrX:347830:-	chrX	347827	347830	-	1.8163	0.0284632	0.215093	1.07212	0.218167	0.542839	1.20775	0.154093	0.552621	-0.848794	0.408697	0.786812	-0.354666	0.693079	0.948208
chrX:348043:-	chrX:348043:-	chrX	348043	348043	-	0.77067	0.579036	0.962357	1.26067	0.368698	0.689104	1.62493	0.231556	0.66372	0.282823	0.849344	NA	0.207097	0.883522	0.970073
chrX:348089-348093:-	chrX:348093:-	chrX	348089	348093	-	-0.774031	0.51264	0.940507	-0.936859	0.456502	0.757702	0.546147	0.62872	0.919217	-0.577795	0.635647	NA	-0.877238	0.45594	0.824648
chrX:348364:-	chrX:348364:-	chrX	348364	348364	-	-1.70655	0.154983	0.619232	-3.78843	0.0317829	0.187791	-0.464167	0.681954	0.934597	-2.27626	0.0944054	NA	-0.749938	0.506206	0.857871
chrX:348389-348398:-	chrX:348389:-	chrX	348389	348398	-	-0.223088	0.799	0.987504	-0.20644	0.820991	0.942463	-0.0595337	0.945922	0.989265	-0.732907	0.440423	NA	0.21678	0.799703	0.948208
chrX:348624-348684:-	chrX:348662:-	chrX	348624	348684	-	0.185842	0.47554	0.925129	0.0516098	0.845619	0.951985	-0.309394	0.241352	0.674845	0.0589567	0.823906	0.957249	-1.10309	3.63e-05	0.000598765
chrX:348711-348775:-	chrX:348727:-	chrX	348711	348775	-	-0.097382	0.709493	0.984436	-0.154107	0.565308	0.82335	-0.160592	0.541956	0.886358	0.297118	0.259718	0.672382	-0.183962	0.480496	0.841408
chrX:348807:-	chrX:348807:-	chrX	348807	348807	-	-2.94427	0.198679	NA	-3.7216	0.108566	NA	-1.19448	0.54995	NA	-2.22198	0.324209	NA	0.319392	0.864129	NA
chrX:348830-348842:-	chrX:348842:-	chrX	348830	348842	-	0.0781204	0.925352	0.994338	0.216997	0.800773	0.934634	0.647096	0.430705	0.834214	0.250357	0.770157	0.941072	0.950118	0.237557	0.622892
chrX:348866-348885:-	chrX:348880:-	chrX	348866	348885	-	-0.00713657	0.980184	0.998767	0.0900704	0.758337	0.916509	0.572822	0.0443554	0.275742	0.464602	0.108008	0.478868	0.733499	0.00937276	0.0663123
chrX:348911-348919:-	chrX:348911:-	chrX	348911	348919	-	0.0782106	0.877524	0.990025	-1.2816	0.0254621	0.162218	-0.0983867	0.848228	0.974423	-0.35798	0.501722	0.833078	0.672941	0.176719	0.529112
chrX:348952-348988:-	chrX:348952:-	chrX	348952	348988	-	-0.375668	0.474734	0.924907	-0.624653	0.262846	0.593163	0.01038	0.984112	0.998235	-0.891672	0.117321	0.497166	0.160807	0.753129	0.948208
chrX:349089:-	chrX:349089:-	chrX	349089	349089	-	-1.84385	0.538806	NA	0.362711	0.902946	NA	-1.63906	0.584822	NA	1.28788	0.648031	NA	2.96989	0.264906	NA
chrX:349115-349120:-	chrX:349115:-	chrX	349115	349120	-	1.0243	0.67639	0.977746	2.70045	0.232074	NA	3.20684	0.134194	NA	4.0935	0.0525385	NA	5.66856	0.00532527	0.0424801
chrX:349150:-	chrX:349150:-	chrX	349150	349150	-	-0.445638	0.920701	NA	0.257965	0.954046	NA	-0.240848	0.957092	NA	0.225572	0.959811	NA	4.25924	0.317423	NA
chrX:349191:-	chrX:349191:-	chrX	349191	349191	-	2.62482	0.342959	NA	3.16286	0.255691	NA	1.20022	0.690117	NA	0.225575	0.940282	NA	4.18054	0.118917	NA
chrX:349216-349327:-	chrX:349232:-	chrX	349216	349327	-	0.854441	0.141459	0.593507	0.91855	0.114241	0.388237	0.741654	0.202012	0.626093	-1.18595	0.0429602	0.309237	0.669412	0.249335	0.638341
chrX:349356-349387:-	chrX:349367:-	chrX	349356	349387	-	-0.0508149	0.889192	0.990962	-0.473145	0.218001	0.542531	0.262756	0.469699	0.85774	-0.98766	0.0130429	0.163501	2.31157	4.24e-11	1.99e-09
chrX:349663:-	chrX:349663:-	chrX	349663	349663	-	0.825865	0.626618	NA	-3.04701	0.160997	NA	-0.10314	0.953763	NA	0.969956	0.574888	NA	0.0351655	0.983814	NA
chrX:349763:-	chrX:349763:-	chrX	349763	349763	-	2.55029	0.295376	NA	3.76463	0.115745	NA	4.00647	0.0883518	NA	3.35169	0.167101	NA	-0.639517	0.813026	NA
chrX:349829-349834:-	chrX:349829:-	chrX	349829	349834	-	5.14454	0.00439921	0.0588178	4.73051	0.0103085	0.0883226	5.44879	0.00252556	0.0400816	4.52062	0.0147352	NA	0.777952	0.730096	0.948208
chrX:350171:-	chrX:350171:-	chrX	350171	350171	-	4.61005	0.040835	NA	4.05204	0.0789352	NA	4.00832	0.0790056	NA	0.225586	0.93201	NA	-0.639512	0.808887	NA
chrX:350290:-	chrX:350290:-	chrX	350290	350290	-	5.66241	0.0021077	0.034207	5.26972	0.00476205	0.0514625	5.10917	0.00593321	0.0726671	2.79108	0.176229	NA	-0.639517	0.782977	0.948208
chrX:350531-350566:-	chrX:350560:-	chrX	350531	350566	-	6.49153	4.06e-09	5.06e-07	5.57487	5.32e-07	4.18e-05	5.59195	4.5e-07	3.76e-05	3.40742	0.00307137	0.0685179	-0.0470185	0.972785	0.992074
chrX:352153-352234:-	chrX:352162:-	chrX	352153	352234	-	0.0227122	0.934309	0.994658	-0.125233	0.656997	0.87018	-0.365263	0.191435	0.611001	-0.251742	0.374035	0.766141	-0.689344	0.0135132	0.0883164
chrX:355199-355205:-	chrX:355205:-	chrX	355199	355205	-	-1.80039	0.295618	0.816486	-2.11612	0.28422	NA	-2.59321	0.194635	NA	1.82607	0.203245	NA	-0.069389	0.962674	0.989932
chrX:355241-355245:-	chrX:355241:-	chrX	355241	355245	-	-5.11998	0.00902147	0.0977291	-2.99442	0.121803	NA	-2.46927	0.14014	0.525269	0.872546	0.527554	NA	-0.116827	0.932784	0.983364
chrX:357945:-	chrX:357945:-	chrX	357945	357945	-	1.5037	0.517648	NA	1.11026	0.650166	NA	1.288	0.585451	NA	2.00731	0.390843	NA	2.15167	0.344158	NA
chrX:358019:-	chrX:358019:-	chrX	358019	358019	-	1.99906	0.438779	NA	1.74813	0.524977	NA	2.78864	0.267262	NA	1.60119	0.559012	NA	4.36818	0.0697883	NA
chrX:358042-358162:-	chrX:358090:-	chrX	358042	358162	-	-0.109917	0.714364	0.984606	0.214947	0.482913	0.775248	0.893772	0.00216968	0.036058	1.05174	0.000357171	0.0156345	2.71008	7.14e-22	1.22e-19
chrX:358183:-	chrX:358183:-	chrX	358183	358183	-	1.18905	0.607654	NA	0.24573	0.924124	NA	1.29063	0.578979	NA	1.38326	0.559614	NA	3.51604	0.109607	NA
chrX:358242:-	chrX:358242:-	chrX	358242	358242	-	1.48034	0.461729	0.921069	1.7847	0.38475	NA	2.53864	0.193128	NA	1.18956	0.577031	NA	3.66854	0.0535843	0.245037
chrX:358666:-	chrX:358666:-	chrX	358666	358666	-	2.59155	0.213877	NA	1.37161	0.542458	NA	2.1103	0.320051	NA	2.15156	0.318515	NA	2.23516	0.285472	NA
chrX:358762-358777:-	chrX:358777:-	chrX	358762	358777	-	1.04629	0.174703	0.659342	-0.582731	0.501504	0.786316	0.514614	0.513431	0.877034	-1.44467	0.12823	0.515082	0.269368	0.731015	0.948208
chrX:358801:-	chrX:358801:-	chrX	358801	358801	-	1.24302	0.310928	0.829455	0.19208	0.884875	0.963958	0.632064	0.615757	0.915689	-0.732056	0.610615	NA	-0.259489	0.84058	0.958426
chrX:359653-359655:-	chrX:359655:-	chrX	359653	359655	-	0.0848253	0.920682	0.993728	-0.0473033	0.958039	0.987187	0.507837	0.54691	0.888704	0.511477	0.553751	0.85762	0.205592	0.80661	0.948277
chrX:359676-359755:-	chrX:359713:-	chrX	359676	359755	-	-0.0211575	0.919449	0.993622	-0.297985	0.16192	0.466857	-0.228424	0.277865	0.715204	-0.123993	0.558903	0.859819	-0.328862	0.116589	0.410686
chrX:360519:-	chrX:360519:-	chrX	360519	360519	-	0.801856	0.624714	0.966353	-0.219126	0.90508	NA	0.211408	0.901315	NA	-0.326921	0.859824	NA	1.71926	0.279396	0.678322
chrX:360763:-	chrX:360763:-	chrX	360763	360763	-	0.413641	0.79868	0.987504	1.2964	0.420215	NA	0.942292	0.555484	NA	1.12064	0.489084	NA	1.36366	0.381381	0.775185
chrX:360863:-	chrX:360863:-	chrX	360863	360863	-	2.54673	0.372002	NA	0.257972	0.933319	NA	2.7848	0.328427	NA	0.225579	0.941676	NA	4.09802	0.13816	NA
chrX:361153:-	chrX:361153:-	chrX	361153	361153	-	0.590341	0.802392	NA	-1.14955	0.654676	NA	-0.203883	0.936739	NA	3.96227	0.067247	NA	0.936842	0.682398	NA
chrX:363849:-	chrX:363849:-	chrX	363849	363849	-	4.45047	0.0934607	NA	3.16364	0.251326	NA	3.51989	0.191609	NA	0.225579	0.939826	NA	-0.639519	0.830539	NA
chrX:364046:-	chrX:364046:-	chrX	364046	364046	-	4.09713	0.106588	NA	4.05491	0.114786	NA	2.78872	0.288231	NA	0.225584	0.937527	NA	-0.639514	0.824161	NA
chrX:364352:-	chrX:364352:-	chrX	364352	364352	-	4.35373	0.15621	NA	3.15348	0.318345	NA	1.20002	0.721113	NA	0.225577	0.94651	NA	-0.63952	0.849149	NA
chrX:365524-365540:-	chrX:365524:-	chrX	365524	365540	-	0.299511	0.757313	0.986786	1.01925	0.292613	0.624234	0.660534	0.492257	0.866289	0.043182	0.966589	NA	1.53457	0.0967559	0.365772
chrX:366203-366213:-	chrX:366213:-	chrX	366203	366213	-	7.5485	5.29e-06	0.000276012	5.08269	0.00296701	0.0375021	5.66343	0.000746427	0.0161113	3.95344	0.0259545	0.240503	-0.639519	0.770546	0.948208
chrX:368645:-	chrX:368645:-	chrX	368645	368645	-	0.643909	0.610841	0.96582	0.905071	0.482335	0.774891	0.979035	0.437011	0.839058	0.0860187	0.949179	NA	-0.146149	0.910357	0.977269
chrX:368745:-	chrX:368745:-	chrX	368745	368745	-	2.08438	0.391761	NA	3.7048	0.112957	NA	4.19702	0.0657941	NA	1.60561	0.538751	NA	4.05827	0.0740885	NA
chrX:369080-369098:-	chrX:369085:-	chrX	369080	369098	-	0.217694	0.813579	0.987504	1.18116	0.196228	0.514477	0.782659	0.390076	0.808219	0.211989	0.824617	0.957282	0.882927	0.325448	0.73138
chrX:370538:-	chrX:370538:-	chrX	370538	370538	-	2.49329	0.216463	NA	2.77173	0.174172	NA	2.0419	0.320285	NA	1.71219	0.421186	NA	0.955429	0.651599	NA
chrX:373894-373988:-	chrX:373956:-	chrX	373894	373988	-	0.48867	0.158875	0.62865	0.245012	0.483012	0.775248	0.0227974	0.947826	0.989517	-0.801093	0.0238585	0.230694	-0.433057	0.214134	0.589339
chrX:374353:-	chrX:374353:-	chrX	374353	374353	-	0.501309	0.845352	NA	2.9759	0.217408	NA	0.794134	0.75613	NA	0.198328	0.941794	NA	2.26103	0.347121	NA
chrX:375259:-	chrX:375259:-	chrX	375259	375259	-	-1.92679	0.432178	0.909854	0.195764	0.935876	NA	-1.72199	0.482688	NA	4.45319	0.026852	NA	2.52316	0.216284	0.59275
chrX:375794-375814:-	chrX:375794:-	chrX	375794	375814	-	-4.82917	0.00586577	0.0716779	-2.69668	0.117487	0.393889	-2.17975	0.126051	0.500629	3.0315	0.00282371	NA	0.301635	0.776859	0.948208
chrX:375843-375859:-	chrX:375843:-	chrX	375843	375859	-	-2.03631	0.0867853	0.449609	-1.3094	0.268806	0.599477	-0.789425	0.440739	0.842212	3.47854	4.53e-05	0.00322642	-0.775064	0.429406	0.805631
chrX:376081-376121:-	chrX:376089:-	chrX	376081	376121	-	-1.83551	0.000452316	0.0103185	-1.55281	0.00522295	0.0549689	-0.623181	0.185367	0.604666	1.42741	0.000964605	0.0309361	2.11065	4.65e-07	1.14e-05
chrX:376910-376922:-	chrX:376910:-	chrX	376910	376922	-	-1.37229	0.52543	0.94653	-2.09191	0.337787	NA	-1.14895	0.598376	0.909488	3.93263	0.018101	NA	1.41953	0.408478	0.792676
chrX:377032:-	chrX:377032:-	chrX	377032	377032	-	-4.31083	0.0522634	NA	-1.25081	0.529461	NA	-2.66455	0.230031	NA	1.27296	0.465584	NA	-1.05493	0.565624	NA
chrX:380465-380523:-	chrX:380507:-	chrX	380465	380523	-	0.58052	0.218541	0.727979	0.464124	0.339963	0.664366	0.576836	0.224338	0.655168	-0.627375	0.228606	0.642685	-0.611498	0.212787	0.587787
chrX:380617-380634:-	chrX:380617:-	chrX	380617	380634	-	-0.790927	0.560743	0.958154	1.12138	0.36833	0.688766	0.999318	0.414783	0.823771	0.728412	0.567035	NA	1.30279	0.276888	0.674441
chrX:380704:-	chrX:380704:-	chrX	380704	380704	-	0.597008	0.732319	NA	0.203643	0.912575	NA	0.794323	0.649094	NA	1.06917	0.543812	NA	-0.641851	0.728342	NA
chrX:380903-380967:-	chrX:380927:-	chrX	380903	380967	-	0.452604	0.505016	0.937593	-0.0710994	0.923255	0.976541	0.245119	0.723913	0.944554	0.735461	0.288853	0.698945	2.66682	3.13e-05	0.000525648
chrX:380989-381095:-	chrX:381054:-	chrX	380989	381095	-	-0.161633	0.467782	0.923526	-0.494232	0.030294	0.182082	-0.194606	0.383984	0.803734	0.208476	0.351941	0.749544	1.43729	5.05e-11	2.35e-09
chrX:386373-386410:-	chrX:386410:-	chrX	386373	386410	-	4.42054	0.00651179	0.0772059	4.55084	0.00538902	0.056001	4.8808	0.00260535	0.0409497	1.11069	0.562057	NA	1.89931	0.266698	0.661549
chrX:386432:-	chrX:386432:-	chrX	386432	386432	-	3.75441	0.123556	NA	4.24655	0.0827823	NA	3.7847	0.121755	NA	0.225585	0.935273	NA	-0.639514	0.817913	NA
chrX:386456:-	chrX:386456:-	chrX	386456	386456	-	4.27382	0.0411549	0.277406	4.32981	0.0412999	NA	4.52252	0.0305744	NA	0.225581	0.928082	NA	2.3464	0.288203	NA
chrX:386603:-	chrX:386603:-	chrX	386603	386603	-	5.52081	0.00341038	0.0487863	4.25287	0.0295509	NA	4.52613	0.0181762	0.154849	3.95627	0.0449566	NA	-0.639517	0.785951	0.948208
chrX:387085:-	chrX:387085:-	chrX	387085	387085	-	0.932225	0.525689	0.94653	-0.427062	0.794003	NA	0.783401	0.597597	NA	-3.516	0.0815889	NA	-0.452193	0.768854	0.948208
chrX:387130:-	chrX:387130:-	chrX	387130	387130	-	0.588368	0.718998	NA	-0.815131	0.661797	NA	0.27321	0.869798	NA	-1.90182	0.359314	NA	0.0296261	0.985733	NA
chrX:387259-387293:-	chrX:387277:-	chrX	387259	387293	-	-0.35091	0.634573	0.968962	-0.729719	0.352986	0.675805	-0.572624	0.447021	0.844972	-0.905163	0.254881	0.66743	-1.25727	0.100664	0.375424
chrX:387321:-	chrX:387321:-	chrX	387321	387321	-	1.30793	0.395146	0.89071	2.01946	0.189109	0.505829	1.86623	0.220207	0.649342	1.78634	0.248934	NA	0.122587	0.939228	0.985095
chrX:387346-387368:-	chrX:387348:-	chrX	387346	387368	-	-0.9151	0.00476597	0.0620296	-1.05399	0.00192444	0.0276778	-0.887156	0.00663104	0.0782604	0.427789	0.176969	0.582068	-0.307639	0.329628	0.735767
chrX:387439-387545:-	chrX:387499:-	chrX	387439	387545	-	-0.351742	0.0569056	0.34426	-0.510889	0.00639872	0.0635069	-0.419292	0.0237173	0.18316	0.366645	0.0471328	0.325251	-0.283099	0.124338	0.427515
chrX:387651-387676:-	chrX:387676:-	chrX	387651	387676	-	-0.800115	0.404492	0.896812	-1.68591	0.134364	0.421959	-1.01105	0.30681	0.743058	-0.557636	0.573592	NA	1.45273	0.0999606	0.373631
chrX:387714:-	chrX:387714:-	chrX	387714	387714	-	-0.530566	0.842269	NA	0.17108	0.948817	NA	-0.296584	0.911918	NA	1.68608	0.485694	NA	3.03293	0.186551	NA
chrX:388165-388172:-	chrX:388165:-	chrX	388165	388172	-	0.209027	0.875258	0.989815	0.178088	0.898394	0.968684	0.413635	0.756037	0.951543	-0.0292469	0.983506	NA	1.62978	0.197355	0.564062
chrX:388577:-	chrX:388577:-	chrX	388577	388577	-	-0.428671	0.788019	0.987504	-0.124807	0.939593	NA	1.40152	0.342395	NA	-0.0676695	0.966971	NA	0.680675	0.648075	0.932851
chrX:388600:-	chrX:388600:-	chrX	388600	388600	-	5.5434	0.00317854	0.0463189	4.86166	0.0112139	NA	4.52262	0.0179228	0.153328	2.65911	0.209129	NA	-0.639515	0.785531	0.948208
chrX:388637-388645:-	chrX:388645:-	chrX	388637	388645	-	6.29147	0.000247089	0.00642921	5.02544	0.00432189	0.0482633	5.59213	0.00122626	0.0236358	5.07671	0.00388373	NA	2.30102	0.226998	0.608413
chrX:388675:-	chrX:388675:-	chrX	388675	388675	-	3.93553	0.12439	NA	3.40787	0.195367	NA	3.2049	0.219276	NA	1.5977	0.576274	NA	0.758223	0.791707	NA
chrX:388724:-	chrX:388724:-	chrX	388724	388724	-	-0.718785	0.417101	0.903653	-0.431572	0.635941	0.8597	-0.50886	0.565471	0.89634	-0.32539	0.718534	NA	-0.0573931	0.946173	0.986553
chrX:388747:-	chrX:388747:-	chrX	388747	388747	-	-2.09745	0.213614	0.720544	0.219844	0.879842	NA	-0.511946	0.728577	NA	0.154784	0.915456	NA	0.255902	0.854466	0.9624
chrX:388880:-	chrX:388880:-	chrX	388880	388880	-	6.4491	0.000302007	0.00750642	4.64969	0.0117721	0.0965091	4.2044	0.0225401	0.177294	4.56197	0.0136316	NA	-0.639518	0.77952	0.948208
chrX:388921-388934:-	chrX:388921:-	chrX	388921	388934	-	6.09624	0.000832382	0.0166432	4.80988	0.0102346	0.0879369	5.00747	0.00673988	0.0790431	2.65628	0.200598	NA	0.826035	0.716478	0.948208
chrX:388958:-	chrX:388958:-	chrX	388958	388958	-	3.07473	0.22154	NA	0.353678	0.90093	NA	0.806367	0.763398	NA	0.197293	0.944478	NA	-0.642224	0.82141	NA
chrX:390854-390939:-	chrX:390914:-	chrX	390854	390939	-	0.15249	0.571203	0.96064	0.1231	0.651474	0.868127	0.0605579	0.822775	0.970954	-0.137852	0.614962	0.887314	-0.392312	0.147217	0.474507
chrX:391125:-	chrX:391125:-	chrX	391125	391125	-	1.26517	0.20588	0.708519	-0.166861	0.884719	0.963958	1.11562	0.270888	0.70906	-0.162105	0.887466	NA	2.47333	0.0107775	0.0737388
chrX:391433:-	chrX:391433:-	chrX	391433	391433	-	-0.369127	0.888411	NA	-1.14724	0.665745	NA	0.796638	0.745254	NA	1.0573	0.670498	NA	3.8144	0.0902514	NA
chrX:391463-391467:-	chrX:391467:-	chrX	391463	391467	-	0.796862	0.568363	0.960285	0.742182	0.6134	0.849183	0.205659	0.889006	0.979732	1.62684	0.240595	NA	2.95852	0.0236827	0.136429
chrX:392751:-	chrX:392751:-	chrX	392751	392751	-	-0.231163	0.910479	NA	-1.50355	0.527917	NA	0.0260766	0.989856	NA	-1.41489	0.545091	NA	0.541683	0.785582	NA
chrX:393653-393704:-	chrX:393663:-	chrX	393653	393704	-	0.101911	0.908145	0.993278	0.300325	0.7456	0.910563	1.05312	0.210102	0.635517	0.383057	0.675231	0.90929	4.4892	7.73e-09	2.63e-07
chrX:395767:-	chrX:395767:-	chrX	395767	395767	-	2.7295	0.0586877	0.350855	0.197461	0.904622	NA	0.142163	0.928765	NA	0.611819	0.70047	NA	-2.23244	0.259127	0.652102
chrX:396041:-	chrX:396041:-	chrX	396041	396041	-	0.167205	0.885838	0.990954	1.89766	0.0880856	0.337036	0.793752	0.485826	0.863715	-0.329657	0.79708	NA	0.841411	0.45199	0.821305
chrX:396078:-	chrX:396078:-	chrX	396078	396078	-	-2.64373	0.131689	0.571458	-0.549155	0.724782	NA	-0.853422	0.58028	NA	-1.97506	0.260084	NA	-3.86936	0.0524505	NA
chrX:396492-396493:-	chrX:396493:-	chrX	396492	396493	-	-0.457494	0.646094	0.970718	-0.288261	0.779954	0.925755	0.299547	0.757503	0.952433	-0.327243	0.751354	NA	-0.116844	0.904238	0.975586
chrX:396519-396525:-	chrX:396525:-	chrX	396519	396525	-	0.420801	0.630179	0.968469	-0.703278	0.483822	0.775701	0.362211	0.682276	0.934606	1.03313	0.238715	NA	0.618848	0.472251	0.836178
chrX:396554-396566:-	chrX:396554:-	chrX	396554	396566	-	-0.297806	0.693441	0.981642	-1.45021	0.101524	0.363231	-0.514583	0.505884	0.87431	0.155545	0.838837	0.960665	0.391474	0.591987	0.906693
chrX:396603-396634:-	chrX:396614:-	chrX	396603	396634	-	-0.544721	0.00746297	0.0855421	-0.595966	0.00401823	0.0459264	-0.317804	0.118358	0.484568	-0.319186	0.120575	0.501883	-0.300666	0.137114	0.454779
chrX:396807-396809:-	chrX:396807:-	chrX	396807	396809	-	-0.368312	0.732482	0.986007	-0.700657	0.569695	0.825953	0.693055	0.490001	0.865298	-0.707761	0.56317	0.861804	4.11896	6.34e-06	0.000124319
chrX:397154:-	chrX:397154:-	chrX	397154	397154	-	-1.47888	0.571428	NA	-2.18914	0.405082	NA	-2.68795	0.306644	NA	2.01616	0.373783	NA	1.03277	0.649373	NA
chrX:397671:-	chrX:397671:-	chrX	397671	397671	-	0.265727	0.921231	NA	0.557378	0.837431	NA	-1.65484	0.577322	NA	-2.63429	0.37521	NA	-0.522368	0.848404	NA
chrX:397694:-	chrX:397694:-	chrX	397694	397694	-	4.47508	0.0691954	NA	3.9482	0.116218	NA	2.78868	0.276616	NA	0.225585	0.936266	NA	-0.639513	0.820665	NA
chrX:397732:-	chrX:397732:-	chrX	397732	397732	-	0.876436	0.457029	0.918601	0.229262	0.853878	0.954237	0.0750405	0.951027	0.990028	-0.571811	0.664301	NA	-5.08717	0.00555697	0.0438928
chrX:397895-397898:-	chrX:397895:-	chrX	397895	397898	-	0.405	0.702204	0.982761	-0.592193	0.608613	0.847628	-0.133072	0.902754	0.980783	-0.46719	0.682768	NA	-2.62148	0.0447537	0.215764
chrX:397924:-	chrX:397924:-	chrX	397924	397924	-	0.655648	0.703694	NA	0.67356	0.703254	NA	0.634022	0.71496	NA	-3.15046	0.150361	NA	-1.45759	0.447256	NA
chrX:397985:-	chrX:397985:-	chrX	397985	397985	-	1.00705	0.369178	0.873245	-0.189607	0.879805	0.962546	0.843333	0.457911	0.852292	1.53335	0.173873	NA	-0.138326	0.905777	0.975893
chrX:398160-398165:-	chrX:398160:-	chrX	398160	398165	-	-0.695297	0.416697	0.903472	-2.49531	0.0210279	0.142087	-0.715884	0.407979	0.82036	0.224478	0.791237	0.947962	-0.524895	0.533979	0.872481
chrX:398192-398206:-	chrX:398192:-	chrX	398192	398206	-	-0.253656	0.73293	0.986043	-1.56729	0.0691146	0.295235	-1.19245	0.132473	0.512933	0.117759	0.875831	0.972592	-0.86753	0.252197	0.641957
chrX:398356-398440:-	chrX:398403:-	chrX	398356	398440	-	-0.50757	0.0720686	0.399813	-0.711196	0.0151126	0.113709	-0.462109	0.103185	0.451291	-0.305464	0.287316	0.697895	0.514584	0.0614578	0.269412
chrX:398491-398497:-	chrX:398491:-	chrX	398491	398497	-	-0.817753	0.387003	0.886083	-1.99127	0.077443	0.313578	-0.581438	0.537738	0.884701	0.0702426	0.940147	NA	-0.898425	0.339099	0.743457
chrX:398520-398549:-	chrX:398549:-	chrX	398520	398549	-	0.185172	0.840067	0.989399	-0.270091	0.782611	0.926471	-1.48971	0.154464	0.553209	0.180816	0.848802	NA	-0.386755	0.678499	0.944025
chrX:399008:-	chrX:399008:-	chrX	399008	399008	-	3.99349	0.0565155	NA	-1.15094	0.64832	NA	2.11823	0.328628	NA	1.26182	0.584583	NA	-0.559174	0.822019	NA
chrX:399035-399044:-	chrX:399035:-	chrX	399035	399044	-	2.53185	0.102591	0.4985	2.43282	0.123808	0.404355	2.58679	0.0962588	0.43558	-2.29512	0.271765	NA	1.0296	0.522426	0.867238
chrX:401316-401320:-	chrX:401320:-	chrX	401316	401320	-	5.79124	0.00271101	0.0411348	4.80585	0.014913	NA	3.78682	0.0583403	0.326649	1.61771	0.491239	NA	-0.639512	0.789447	0.948208
chrX:401426:-	chrX:401426:-	chrX	401426	401426	-	5.20256	0.0111413	0.11237	4.28994	0.0416383	NA	3.20186	0.135819	NA	1.61293	0.508858	NA	0.769344	0.754144	NA
chrX:401599-401602:-	chrX:401602:-	chrX	401599	401602	-	4.7808	0.00553485	0.069231	4.33525	0.0128865	0.10214	2.5882	0.148616	0.541544	-1.19475	0.592927	NA	0.376432	0.84985	0.96142
chrX:401630:-	chrX:401630:-	chrX	401630	401630	-	2.18701	0.244835	NA	1.84692	0.337937	NA	-0.237633	0.909862	NA	-0.833592	0.715843	NA	-1.67636	0.467205	NA
chrX:401662-401672:-	chrX:401662:-	chrX	401662	401672	-	6.73176	5.9e-06	0.000301813	6.25219	2.79e-05	0.00113457	5.64185	0.000157565	0.00478383	3.00081	0.0574282	0.364153	0.969978	0.566976	0.89208
chrX:402435-402538:-	chrX:402502:-	chrX	402435	402538	-	0.202957	0.484956	0.928557	-0.179359	0.539988	0.807898	-0.291062	0.318447	0.752961	0.0963421	0.741444	0.929932	-0.697929	0.016764	0.104609
chrX:402566:-	chrX:402566:-	chrX	402566	402566	-	0.946124	0.565513	NA	0.00246016	0.998895	NA	-0.589573	0.74154	NA	0.30376	0.861304	NA	-1.57524	0.402667	NA
chrX:402983:-	chrX:402983:-	chrX	402983	402983	-	-1.0565	0.590822	NA	-3.41601	0.136541	NA	-1.46781	0.474949	NA	-0.328242	0.866988	NA	0.384587	0.834858	NA
chrX:403274-403315:-	chrX:403315:-	chrX	403274	403315	-	0.836722	0.53958	0.951292	2.28445	0.0786394	0.315844	1.09117	0.421995	0.828961	1.47465	0.280387	0.6932	6.25678	1.83e-07	4.91e-06
chrX:403342-403367:-	chrX:403367:-	chrX	403342	403367	-	2.55875	0.19706	0.695289	1.71738	0.450747	0.752552	2.20186	0.286655	0.722798	0.225595	0.92202	NA	7.02144	0.000100267	0.00145991
chrX:404662:-	chrX:404662:-	chrX	404662	404662	-	0.172539	0.934252	NA	0.257234	0.905914	NA	-0.238392	0.912749	NA	-0.694877	0.766642	NA	1.88984	0.337201	NA
chrX:404895:-	chrX:404895:-	chrX	404895	404895	-	1.43139	0.325453	0.840544	0.983286	0.520766	NA	0.726461	0.630491	0.919725	0.0214744	0.989597	NA	1.95216	0.172456	0.521927
chrX:405097-405133:-	chrX:405121:-	chrX	405097	405133	-	-0.140221	0.784317	0.987504	-0.0274525	0.95861	0.987187	-0.00381208	0.994081	0.999292	0.221079	0.671109	0.908394	1.63781	0.000766876	0.00861034
chrX:406296-406310:-	chrX:406302:-	chrX	406296	406310	-	3.91644	0.00276276	0.0417076	3.33734	0.0125008	0.100259	3.52401	0.00751924	0.0847887	1.7602	0.215731	NA	-3.07383	0.112082	0.40067
chrX:406335:-	chrX:406335:-	chrX	406335	406335	-	2.29417	0.431706	NA	1.62025	0.588761	NA	1.24459	0.676829	NA	-1.31039	0.68307	NA	-2.17549	0.497889	NA
chrX:407126:-	chrX:407126:-	chrX	407126	407126	-	-0.445622	0.900503	NA	0.257983	0.942299	NA	-0.240831	0.946129	NA	0.225591	0.949533	NA	5.14575	0.116142	NA
chrX:407310-407332:-	chrX:407312:-	chrX	407310	407332	-	0.542801	0.369651	0.873637	-0.222094	0.738876	0.907494	0.274975	0.656841	0.928241	-1.17741	0.112708	0.488378	2.94937	2.74e-07	7.05e-06
chrX:409835:-	chrX:409835:-	chrX	409835	409835	-	4.00256	0.0865656	NA	4.05283	0.0868769	NA	3.52499	0.136694	NA	1.60387	0.546538	NA	-0.639515	0.812587	NA
chrX:410087:-	chrX:410087:-	chrX	410087	410087	-	0.61365	0.749577	NA	0.360252	0.857757	NA	-0.111362	0.955737	NA	0.793497	0.685906	NA	0.620055	0.745513	NA
chrX:410205:-	chrX:410205:-	chrX	410205	410205	-	0.3775	0.820696	0.988315	-0.12899	0.942146	NA	1.21104	0.458583	NA	-0.606831	0.742244	NA	-2.60469	0.213125	NA
chrX:410228:-	chrX:410228:-	chrX	410228	410228	-	-0.445175	0.707633	0.984303	0.24108	0.839198	0.949568	0.615902	0.591844	0.9067	-0.568908	0.648401	NA	-0.0521861	0.964083	0.990215
chrX:410411:-	chrX:410411:-	chrX	410411	410411	-	2.74349	0.126479	0.55991	0.853191	0.663311	NA	2.32264	0.20031	NA	-0.726062	0.744742	NA	-1.49611	0.503295	0.856002
chrX:410993:-	chrX:410993:-	chrX	410993	410993	-	-0.968341	0.305191	0.824152	-0.746861	0.445847	0.749375	-0.663996	0.479104	0.861559	0.849187	0.342128	NA	-0.755872	0.412348	0.795002
chrX:411016-411086:-	chrX:411016:-	chrX	411016	411086	-	-0.43781	0.150989	0.61256	-0.98263	0.00235238	0.0322639	-0.720742	0.0201722	0.164343	-0.301237	0.333001	0.734653	-0.599861	0.0489381	0.230188
chrX:412874:-	chrX:412874:-	chrX	412874	412874	-	2.55778	0.183017	0.673672	3.63714	0.0562419	NA	2.10757	0.282232	NA	2.15513	0.280265	NA	1.32463	0.506144	0.857871
chrX:413403-413492:-	chrX:413446:-	chrX	413403	413492	-	0.418519	0.0954475	0.475843	1.10689	1.04e-05	0.000514827	0.366304	0.144866	0.534604	0.720335	0.00416981	0.0850557	0.237947	0.343146	0.748471
chrX:413515:-	chrX:413515:-	chrX	413515	413515	-	0.969715	0.431152	0.909605	0.0946052	0.943637	0.982265	0.423611	0.738562	0.947549	1.03213	0.413319	NA	-0.0186596	0.9883	0.996487
chrX:414569:-	chrX:414569:-	chrX	414569	414569	-	1.50251	0.521199	NA	0.17383	0.947442	NA	0.703499	0.774071	NA	2.78235	0.227371	NA	1.47646	0.526355	NA
chrX:414596-414599:-	chrX:414596:-	chrX	414596	414599	-	-1.25277	0.246333	0.763302	-0.177907	0.866161	0.958761	-1.01788	0.345149	0.774977	-0.616253	0.569678	NA	-0.364026	0.721585	0.948208
chrX:414638:-	chrX:414638:-	chrX	414638	414638	-	1.10145	0.591765	NA	-0.771816	0.749631	NA	1.08468	0.599911	NA	0.0223746	0.992064	NA	1.37023	0.499732	NA
chrX:414730:-	chrX:414730:-	chrX	414730	414730	-	0.309524	0.843323	0.98946	0.266513	0.872027	NA	1.20628	0.425538	NA	1.27399	0.408703	NA	1.64037	0.266397	0.661196
chrX:414758-414858:-	chrX:414810:-	chrX	414758	414858	-	-0.459517	0.0327656	0.237674	-0.476802	0.0284439	0.174376	0.0464764	0.828486	0.972751	-0.0289762	0.893281	0.975825	0.226225	0.289472	0.690161
chrX:415716-415721:-	chrX:415716:-	chrX	415716	415721	-	-1.97465	0.330923	0.844422	-2.7339	0.184548	0.499482	0.534807	0.739133	0.94769	0.444755	0.789532	NA	3.5494	0.0167927	0.104748
chrX:415746-415751:-	chrX:415751:-	chrX	415746	415751	-	-1.46134	0.489341	0.930916	0.259223	0.890114	0.965813	-1.23686	0.56222	0.894045	0.367855	0.842346	NA	3.95496	0.0127824	0.0845276
chrX:416046:-	chrX:416046:-	chrX	416046	416046	-	-0.648992	0.442098	0.914553	-1.58066	0.112599	0.385367	0.0495845	0.951842	0.990304	-1.02955	0.265485	0.676815	2.253	0.00349826	0.0303342
chrX:417269-417287:-	chrX:417282:-	chrX	417269	417287	-	-1.76259	0.00774809	0.0878573	-0.830826	0.2003	0.520155	-0.991962	0.11662	0.481154	1.32948	0.023045	0.226156	-0.380994	0.525215	0.868087
chrX:417312-417324:-	chrX:417324:-	chrX	417312	417324	-	0.0993898	0.871958	0.989616	0.444143	0.481022	0.774333	0.716261	0.235939	0.668496	1.40559	0.0190354	0.204849	0.0655933	0.914596	0.977869
chrX:417692:-	chrX:417692:-	chrX	417692	417692	-	0.857548	0.655043	NA	1.56011	0.416368	NA	0.345232	0.862179	NA	-0.832278	0.713458	NA	1.50331	0.421596	NA
chrX:417740:-	chrX:417740:-	chrX	417740	417740	-	0.190886	0.886902	0.990954	2.29779	0.0680618	0.292747	1.80966	0.150539	0.546049	-0.288477	0.846416	NA	0.833961	0.516114	0.863493
chrX:417779-417787:-	chrX:417787:-	chrX	417779	417787	-	0.955178	0.479713	0.926587	2.67065	0.0400202	0.214984	2.20541	0.0895919	0.419175	1.86189	0.163775	NA	1.93375	0.135452	0.451841
chrX:418032:-	chrX:418032:-	chrX	418032	418032	-	1.67095	0.290311	0.811459	1.17175	0.477586	NA	1.08926	0.501118	NA	0.94556	0.570797	NA	0.853408	0.596019	0.90894
chrX:418201:-	chrX:418201:-	chrX	418201	418201	-	-0.893806	0.671938	NA	0.869713	0.660225	NA	0.628518	0.748127	NA	-0.218263	0.917634	NA	-1.08651	0.606696	NA
chrX:419429:-	chrX:419429:-	chrX	419429	419429	-	3.58458	0.0664198	0.380363	5.29094	0.00555147	NA	4.52378	0.0182823	NA	3.46864	0.0853806	NA	3.76996	0.0510717	0.236749
chrX:419562-419656:-	chrX:419587:-	chrX	419562	419656	-	0.305058	0.248707	0.765661	0.223408	0.400877	0.714842	0.0727551	0.783803	0.961786	0.187462	0.481017	0.823859	0.386351	0.143524	0.467998
chrX:420408:-	chrX:420408:-	chrX	420408	420408	-	-1.05664	0.164159	0.639227	-4.62496	0.000238031	0.00611927	-2.17779	0.00734125	0.083488	-0.271779	0.719681	0.921947	-0.221114	0.765331	0.948208
chrX:420473-420504:-	chrX:420483:-	chrX	420473	420504	-	-0.848918	0.190784	0.685146	-2.1083	0.00482711	0.052013	-0.996191	0.130557	0.50902	-0.23451	0.718627	0.921947	-0.263027	0.677941	0.943857
chrX:420576-420609:-	chrX:420576:-	chrX	420576	420609	-	-0.241104	0.61342	0.966073	0.100491	0.835836	0.948089	-0.0251759	0.957904	0.991837	-0.00186632	0.996942	0.99916	0.160968	0.730908	0.948208
chrX:420648-420652:-	chrX:420652:-	chrX	420648	420652	-	-0.0769192	0.961008	0.997489	1.34425	0.379171	NA	0.16001	0.918855	NA	-0.434779	0.796599	NA	0.579521	0.703485	0.948208
chrX:420790:-	chrX:420790:-	chrX	420790	420790	-	0.0669407	0.969343	NA	-0.198844	0.913682	NA	-1.32114	0.493955	NA	0.283741	0.873312	NA	-0.289815	0.868758	NA
chrX:420965-420971:-	chrX:420965:-	chrX	420965	420971	-	-0.995137	0.142792	0.596868	-1.33876	0.0680635	0.292747	-0.726775	0.282777	0.719393	-0.779078	0.265056	0.676128	-1.69634	0.0155699	0.0987227
chrX:421149:-	chrX:421149:-	chrX	421149	421149	-	0.134609	0.893109	0.991819	0.160269	0.876357	0.961164	-0.782874	0.458633	0.852602	0.601047	0.551695	NA	0.0629491	0.94971	0.987459
chrX:421232:-	chrX:421232:-	chrX	421232	421232	-	-1.07873	0.531492	0.948974	1.09665	0.488171	NA	0.622613	0.693587	NA	0.47621	0.769438	NA	-0.415937	0.798122	0.948208
chrX:421412:-	chrX:421412:-	chrX	421412	421412	-	-1.89697	0.189939	0.683938	-0.124481	0.924276	0.976829	-0.0433228	0.972678	0.995204	0.148896	0.907756	NA	0.60084	0.621584	0.921325
chrX:421442:-	chrX:421442:-	chrX	421442	421442	-	0.635159	0.614354	0.966091	0.267036	0.84113	0.950295	-0.786213	0.572469	0.89888	0.969654	0.448339	NA	-0.0962388	0.940559	0.985141
chrX:421636-421732:-	chrX:421706:-	chrX	421636	421732	-	-0.0539578	0.747953	0.986786	-0.207637	0.21903	0.543571	-0.19601	0.244016	0.678212	0.0938695	0.577476	0.867962	-0.210538	0.209837	0.582896
chrX:424130-424186:-	chrX:424147:-	chrX	424130	424186	-	-0.305749	0.225806	0.737285	-0.340052	0.18509	0.500311	-0.106846	0.672095	0.932545	0.35865	0.155629	0.558022	0.452415	0.0696652	0.292985
chrX:424521-424524:-	chrX:424524:-	chrX	424521	424524	-	1.03378	0.0745049	0.408051	0.941551	0.121937	0.401235	1.35875	0.0183933	0.155654	0.634294	0.308172	0.713742	4.23234	5.53e-15	4.34e-13
chrX:424816-424853:-	chrX:424853:-	chrX	424816	424853	-	0.00209582	0.996774	0.999954	-0.688091	0.223244	0.548761	-0.466383	0.384063	0.803734	-0.106256	0.843938	0.961784	2.36595	1.59e-06	3.55e-05
chrX:424904:-	chrX:424904:-	chrX	424904	424904	-	0.32558	0.808072	0.987504	1.31838	0.318002	0.646051	0.877031	0.505295	0.87431	0.625122	0.648799	NA	1.94637	0.122243	0.422749
chrX:426082:-	chrX:426082:-	chrX	426082	426082	-	4.1872	0.0752646	NA	3.95032	0.0995059	NA	3.525	0.140783	NA	0.225582	0.93388	NA	0.762164	0.777346	NA
chrX:431599:-	chrX:431599:-	chrX	431599	431599	-	0.310353	0.848164	0.98946	1.26065	0.430885	NA	1.37825	0.377329	NA	0.871653	0.593283	NA	-0.56385	0.739747	0.948208
chrX:431690-431778:-	chrX:431709:-	chrX	431690	431778	-	0.13429	0.641763	0.970589	0.166064	0.573629	0.828599	0.603704	0.0352699	0.236466	0.704394	0.0150179	0.17754	0.75356	0.00794618	0.0579949
chrX:431888-431900:-	chrX:431888:-	chrX	431888	431900	-	0.805043	0.548714	0.954053	-0.432554	0.775759	NA	-0.954353	0.530695	0.883022	0.597507	0.669017	NA	0.941881	0.478506	0.840206
chrX:431970:-	chrX:431970:-	chrX	431970	431970	-	-0.522631	0.637398	0.969482	-0.387106	0.735593	0.905278	-0.566301	0.614191	0.915422	-0.822404	0.486803	NA	0.557135	0.599713	0.910964
chrX:432140:-	chrX:432140:-	chrX	432140	432140	-	-1.58648	0.373916	NA	-1.52047	0.421369	NA	0.0651184	0.968589	NA	-1.65256	0.387252	NA	-0.494333	0.766342	NA
chrX:432177-432233:-	chrX:432213:-	chrX	432177	432233	-	-0.243491	0.312467	0.831055	-0.680563	0.00528802	0.0554616	-0.208402	0.387892	0.807121	-0.422229	0.082451	0.42365	-0.471458	0.0505692	0.235152
chrX:432399:-	chrX:432399:-	chrX	432399	432399	-	0.139948	0.924674	0.994146	0.302025	0.843764	NA	0.0820982	0.956444	0.991436	1.04574	0.474882	NA	1.59408	0.25431	0.644657
chrX:432548:-	chrX:432548:-	chrX	432548	432548	-	-0.428851	0.7673	0.987383	-0.821513	0.601614	NA	-0.876078	0.562521	NA	0.10739	0.941421	NA	0.703463	0.610003	0.916643
chrX:433205:-	chrX:433205:-	chrX	433205	433205	-	-0.43245	0.887898	NA	2.37576	0.398247	NA	-1.6378	0.595036	NA	-1.17138	0.703816	NA	2.31201	0.404517	NA
chrX:433336:-	chrX:433336:-	chrX	433336	433336	-	-0.089718	0.964786	NA	-1.31566	0.554372	NA	-4.15852	0.0873607	NA	-2.31599	0.332842	NA	-2.11015	0.339314	NA
chrX:433412:-	chrX:433412:-	chrX	433412	433412	-	4.54345	0.0407991	NA	2.61135	0.280798	NA	4.20345	0.060499	NA	0.225579	0.931245	NA	3.09978	0.173242	NA
chrX:433435-433445:-	chrX:433435:-	chrX	433435	433445	-	1.70683	0.166323	0.643244	0.731831	0.574915	0.829046	1.06434	0.39809	0.813319	-1.41005	0.378815	NA	-1.65666	0.261825	0.655684
chrX:433551:-	chrX:433551:-	chrX	433551	433551	-	-0.645666	0.573835	0.961092	-2.11677	0.106795	0.373841	-2.61779	0.0461424	0.281856	-2.14818	0.101694	NA	-1.47145	0.21069	0.58424
chrX:433782:-	chrX:433782:-	chrX	433782	433782	-	0.235583	0.88561	0.990954	1.57811	0.321224	NA	0.720648	0.655335	NA	0.379416	0.822764	NA	0.897114	0.569995	0.893976
chrX:434256:-	chrX:434256:-	chrX	434256	434256	-	-0.155616	0.927513	NA	-1.36405	0.480295	NA	-1.77954	0.353118	NA	-0.421046	0.81388	NA	-1.01704	0.563494	NA
chrX:434439:-	chrX:434439:-	chrX	434439	434439	-	-0.119702	0.936842	0.994803	-0.125924	0.937219	NA	0.626077	0.669138	NA	1.79799	0.207503	NA	0.343885	0.8135	0.949455
chrX:434657-434731:-	chrX:434680:-	chrX	434657	434731	-	0.156539	0.385062	0.884816	-0.29698	0.102123	0.364511	-0.0975243	0.58931	0.905849	0.0459975	0.799524	0.949639	-0.446962	0.0133378	0.0874029
chrX:434949-434993:-	chrX:434965:-	chrX	434949	434993	-	-0.00655156	0.988522	0.999659	0.159418	0.735808	0.905278	0.286129	0.527693	0.882147	-0.456408	0.35977	0.75541	3.51384	4.43e-17	4.54e-15
chrX:435957:-	chrX:435957:-	chrX	435957	435957	-	0.983999	0.586878	NA	0.199811	0.917901	NA	0.211933	0.910252	NA	-0.504874	0.80534	NA	0.112785	0.951508	NA
chrX:436585:-	chrX:436585:-	chrX	436585	436585	-	0.164857	0.879974	0.990562	0.316169	0.781561	0.926146	0.666271	0.534139	0.884184	0.737157	0.502587	NA	3.02302	0.00234907	0.0218492
chrX:436618-436638:-	chrX:436618:-	chrX	436618	436638	-	-0.406806	0.731947	0.986007	-0.936366	0.486889	0.778212	0.811499	0.469542	0.857702	-0.315972	0.800151	NA	2.27124	0.0343305	0.179166
chrX:438589-438659:-	chrX:438628:-	chrX	438589	438659	-	1.27152	0.0851338	0.44388	0.962425	0.218386	0.543068	1.42866	0.0535113	0.309172	-0.494326	0.586802	0.873239	3.57938	3.34e-07	8.48e-06
chrX:440322:-	chrX:440322:-	chrX	440322	440322	-	4.83156	0.0943741	NA	2.70503	0.37344	NA	-0.240833	0.940117	NA	0.22559	0.9439	NA	-0.639507	0.841886	NA
chrX:440987-440995:-	chrX:440995:-	chrX	440987	440995	-	3.04565	0.0118478	0.117186	2.66168	0.0317162	0.187526	3.10889	0.0103643	0.105936	1.08535	0.417329	NA	-1.20457	0.440815	0.812965
chrX:441023-441070:-	chrX:441041:-	chrX	441023	441070	-	2.73201	0.000335612	0.00818707	1.82012	0.0208582	0.141385	2.79214	0.000253316	0.00701554	0.693537	0.403293	0.782838	0.44074	0.582958	0.900864
chrX:441155:-	chrX:441155:-	chrX	441155	441155	-	-0.123356	0.905032	0.993278	0.279022	0.791797	0.931197	0.457406	0.6508	0.926581	1.24181	0.212232	NA	1.58248	0.0984374	0.370019
chrX:442466-442496:-	chrX:442496:-	chrX	442466	442496	-	0.296031	0.585249	0.963434	-0.0344644	0.952427	0.985719	0.669068	0.214086	0.641008	0.0811277	0.887092	0.974258	1.40697	0.00696593	0.0523751
chrX:442517-442598:-	chrX:442564:-	chrX	442517	442598	-	0.162272	0.46615	0.923011	0.234286	0.299625	0.631479	0.2699	0.226267	0.656937	0.392706	0.0807841	0.419891	0.639016	0.00375458	0.0321392
chrX:443152:-	chrX:443152:-	chrX	443152	443152	-	4.45039	0.0501807	NA	3.70484	0.113951	NA	2.7851	0.242057	NA	1.6054	0.539711	NA	1.67409	0.49834	NA
chrX:443188-443197:-	chrX:443188:-	chrX	443188	443197	-	2.8702	0.0617525	0.362991	2.2889	0.147988	0.444635	2.38196	0.125832	0.50011	1.9719	0.217653	NA	-0.240289	0.889818	0.97173
chrX:443459:-	chrX:443459:-	chrX	443459	443459	-	0.934273	0.559084	0.957731	-0.367189	0.840717	NA	0.720064	0.657901	NA	-1.44962	0.477612	NA	1.46293	0.350555	NA
chrX:444795:-	chrX:444795:-	chrX	444795	444795	-	3.3993	0.207975	NA	3.77114	0.165385	NA	2.20185	0.43438	NA	1.80141	0.540316	NA	-0.639518	0.830954	NA
chrX:444882-444896:-	chrX:444896:-	chrX	444882	444896	-	0.349415	0.716787	0.98496	-3.3614	0.0160708	0.118474	-1.00358	0.32171	0.754715	-0.806093	0.433247	NA	-2.86778	0.0114806	0.0775657
chrX:445616-445716:-	chrX:445668:-	chrX	445616	445716	-	-0.0799158	0.789654	0.987504	-0.69084	0.0313304	0.186098	-0.088061	0.770513	0.957288	-0.0895301	0.771758	0.941788	0.311834	0.28987	0.690865
chrX:448770-448807:-	chrX:448779:-	chrX	448770	448807	-	-2.91882	2.94e-06	0.000166445	-3.43649	5.47e-08	5.81e-06	-3.43179	4.67e-08	5.12e-06	-4.80939	1.85e-13	1.43e-10	-1.18246	0.0564529	0.253573
chrX:448930:-	chrX:448930:-	chrX	448930	448930	-	-1.98261	0.539071	NA	-1.27901	0.691929	NA	-1.77782	0.581789	NA	0.0525548	0.986891	NA	3.27862	0.259885	NA
chrX:448951:-	chrX:448951:-	chrX	448951	448951	-	-2.77792	0.236321	0.751106	-0.656775	0.7776	NA	-2.57313	0.272673	NA	2.50189	0.190821	NA	2.84821	0.129119	0.437955
chrX:448972:-	chrX:448972:-	chrX	448972	448972	-	1.03811	0.699622	NA	0.257976	0.924307	NA	2.78505	0.254979	NA	3.84106	0.109515	NA	4.59552	0.0488626	NA
chrX:450616-450656:-	chrX:450625:-	chrX	450616	450656	-	2.74668	0.000531573	0.0116636	2.29111	0.0056082	0.0576584	2.01044	0.0140496	0.129234	0.826037	0.370696	0.763314	5.84102	2.6e-14	1.89e-12
chrX:450679-450702:-	chrX:450688:-	chrX	450679	450702	-	0.726672	0.256439	0.774754	0.252094	0.725555	0.90109	1.65995	0.00684125	0.0795835	-0.930897	0.278991	0.691548	5.25304	5.42e-20	8.03e-18
chrX:451976:-	chrX:451976:-	chrX	451976	451976	-	0.788659	0.571583	0.96064	-2.30454	0.235438	NA	0.218021	0.879001	NA	-3.75964	0.0560642	NA	0.876951	0.526486	0.868813
chrX:453417-453431:-	chrX:453431:-	chrX	453417	453431	-	2.59398	0.0971944	0.481111	2.02518	0.211378	NA	1.93344	0.225961	NA	-0.735361	0.717432	NA	1.15594	0.475178	0.837977
chrX:453478:-	chrX:453478:-	chrX	453478	453478	-	1.47392	0.336522	0.847748	0.20664	0.900885	NA	-0.65811	0.699526	NA	-1.83003	0.365206	NA	0.100418	0.94963	0.987455
chrX:453707-453723:-	chrX:453707:-	chrX	453707	453723	-	0.0698306	0.949659	0.995883	0.443962	0.692541	0.885772	0.755017	0.487374	0.864126	-1.02396	0.413812	NA	-1.42177	0.235272	0.620075
chrX:453757-453940:-	chrX:453759:-	chrX	453757	453940	-	-0.131951	0.705188	0.983902	0.0514636	0.883045	0.963712	0.0692556	0.842598	0.974156	-1.20038	0.000710288	0.0252277	-0.843689	0.0158815	0.100201
chrX:453968-453980:-	chrX:453968:-	chrX	453968	453980	-	-0.346104	0.606368	0.964975	0.040124	0.953045	0.986008	-0.0724158	0.913896	0.982724	-1.359	0.071617	0.398651	-1.34893	0.0543316	0.247319
chrX:454070-454099:-	chrX:454080:-	chrX	454070	454099	-	-0.465207	0.459845	0.919506	-0.385133	0.548658	0.813748	-0.715008	0.262447	0.699317	-1.58769	0.0206081	0.214457	-1.5732	0.0155385	0.0985632
chrX:454139-454177:-	chrX:454172:-	chrX	454139	454177	-	-0.191367	0.708175	0.984303	0.791001	0.119987	0.398231	0.103171	0.839789	0.974123	-1.07456	0.0460681	0.321374	-0.885994	0.0867343	0.340922
chrX:454328-454812:-	chrX:454738:-	chrX	454328	454812	-	-0.256003	0.27149	0.791822	0.0221262	0.924348	0.976829	-0.221595	0.341322	0.771789	-0.447773	0.0549613	0.355082	-0.636389	0.00628465	0.0484523
chrX:454839-454856:-	chrX:454839:-	chrX	454839	454856	-	-0.149572	0.794951	0.987504	0.637744	0.266258	0.596577	0.227343	0.690862	0.93736	-1.4113	0.0331801	0.273465	-0.14961	0.79346	0.948208
chrX:454889:-	chrX:454889:-	chrX	454889	454889	-	0.46529	0.74034	0.986353	-0.482714	0.757884	NA	-0.217351	0.882477	NA	-0.16907	0.911293	NA	0.626451	0.651432	0.934274
chrX:454910-454953:-	chrX:454930:-	chrX	454910	454953	-	-0.456297	0.523781	0.945791	-0.523971	0.489085	0.778749	-0.0740798	0.916732	0.982991	-0.554114	0.464437	0.813803	1.13359	0.0912569	0.352948
chrX:457781:-	chrX:457781:-	chrX	457781	457781	-	-0.445632	0.896832	NA	1.66251	0.627323	NA	1.19999	0.726924	NA	0.225581	0.947667	NA	4.50306	0.152222	NA
chrX:457817:-	chrX:457817:-	chrX	457817	457817	-	-0.445631	0.894645	NA	0.257974	0.938892	NA	1.20002	0.721333	NA	1.84013	0.578785	NA	4.59563	0.133772	NA
chrX:458374-458441:-	chrX:458395:-	chrX	458374	458441	-	-0.552419	0.00659029	0.0779391	-0.246492	0.228693	0.555155	-0.0896387	0.658114	0.928363	-0.312799	0.127098	0.512648	-0.0983499	0.625815	0.923853
chrX:458904:-	chrX:458904:-	chrX	458904	458904	-	0.170097	0.919204	NA	-0.606646	0.737138	NA	-2.65816	0.21679	NA	-1.19243	0.529569	NA	-1.12902	0.52175	NA
chrX:459268:-	chrX:459268:-	chrX	459268	459268	-	1.63038	0.272895	0.793167	1.40074	0.361613	NA	1.94483	0.189675	0.610134	-0.403292	0.818559	NA	0.179253	0.908551	0.976765
chrX:459426-459496:-	chrX:459471:-	chrX	459426	459496	-	-0.414201	0.0631982	0.368448	-0.788605	0.000550129	0.0113028	-0.444841	0.0468292	0.284681	-0.514094	0.0232086	0.226826	-0.293879	0.185636	0.543111
chrX:459654:-	chrX:459654:-	chrX	459654	459654	-	-1.54594	0.16222	0.635362	-0.274542	0.796147	0.933045	-0.600423	0.568209	0.897087	-0.526994	0.625083	NA	-0.816776	0.43342	0.808593
chrX:459852:-	chrX:459852:-	chrX	459852	459852	-	-0.137507	0.921831	0.993788	0.642557	0.645484	0.864838	0.179042	0.897833	0.979732	-0.314772	0.830646	NA	-0.748124	0.601153	0.911852
chrX:460130-460155:-	chrX:460139:-	chrX	460130	460155	-	-0.492806	0.332283	0.84526	-0.660001	0.217295	0.541714	-0.487994	0.341567	0.771949	0.641939	0.198728	0.609422	0.116266	0.813959	0.94954
chrX:460193-460217:-	chrX:460213:-	chrX	460193	460217	-	-0.745191	0.0162322	0.144994	-0.696853	0.0283914	0.17426	-0.585647	0.0592097	0.329939	0.0496188	0.872463	0.972389	-0.234057	0.4423	0.813779
chrX:460243-460256:-	chrX:460243:-	chrX	460243	460256	-	0.000510501	0.998879	0.999954	-0.249415	0.510304	0.791759	-0.0617863	0.866227	0.976901	-0.585959	0.129331	0.516089	-0.434124	0.236285	0.621109
chrX:461539-461634:-	chrX:461598:-	chrX	461539	461634	-	0.42045	0.367111	0.871981	0.153921	0.756701	0.915776	0.614988	0.187266	0.607037	-0.420647	0.421582	0.794255	4.57365	5.16e-26	1.32e-23
chrX:462448:-	chrX:462448:-	chrX	462448	462448	-	-0.406623	0.869946	NA	0.942657	0.694663	NA	-2.5484	0.340069	NA	-2.08197	0.435735	NA	2.43037	0.286125	NA
chrX:462478:-	chrX:462478:-	chrX	462478	462478	-	-0.576142	0.652038	0.972468	-0.420447	0.75347	0.914399	0.36541	0.764938	0.955348	-2.53323	0.153284	NA	2.09935	0.0690607	0.291096
chrX:464622:-	chrX:464622:-	chrX	464622	464622	-	0.377572	0.768768	0.987504	1.98878	0.11078	0.381777	0.211463	0.871462	0.977255	0.0487472	0.971428	NA	0.757132	0.547434	0.881306
chrX:464817-464824:-	chrX:464817:-	chrX	464817	464824	-	-0.0110314	0.991005	0.999794	1.15197	0.231707	0.55908	0.636152	0.509108	0.874557	0.0460417	0.96358	0.989894	-0.473621	0.632377	0.927407
chrX:464926-464944:-	chrX:464944:-	chrX	464926	464944	-	-0.694778	0.58948	0.963484	1.0181	0.39802	0.713448	0.495236	0.681297	0.934321	0.796359	0.512944	NA	0.393256	0.741069	0.948208
chrX:464985:-	chrX:464985:-	chrX	464985	464985	-	0.60764	0.756543	NA	0.877625	0.661482	NA	1.34146	0.484764	NA	1.36195	0.485812	NA	-1.59424	0.485822	NA
chrX:465010-465037:-	chrX:465030:-	chrX	465010	465037	-	-0.278647	0.756313	0.986786	0.719317	0.415758	0.725957	0.740001	0.392069	0.809933	1.36805	0.111905	0.486946	0.570334	0.506384	0.857871
chrX:465069:-	chrX:465069:-	chrX	465069	465069	-	0.957785	0.600413	0.964942	-0.665331	0.763859	NA	0.444712	0.815048	NA	2.42457	0.173148	NA	1.71834	0.332211	NA
chrX:465099:-	chrX:465099:-	chrX	465099	465099	-	0.943296	0.506184	0.938048	1.99306	0.154354	0.455224	1.31829	0.349313	0.77809	0.817804	0.581856	NA	1.77988	0.194402	0.55861
chrX:465132:-	chrX:465132:-	chrX	465132	465132	-	-0.679063	0.500476	0.935984	0.476351	0.628225	0.856761	-0.204556	0.836707	0.973553	-0.534601	0.609534	NA	-0.288567	0.767959	0.948208
chrX:465165:-	chrX:465165:-	chrX	465165	465165	-	-0.592492	0.638312	0.969482	0.264431	0.832287	0.946764	-0.210622	0.865845	0.97687	-0.00998791	0.993718	NA	0.207692	0.862726	0.964539
chrX:465336:-	chrX:465336:-	chrX	465336	465336	-	1.90463	0.461233	NA	4.00206	0.102148	NA	2.78136	0.266574	NA	3.00804	0.234511	NA	3.81609	0.11404	NA
chrX:465585:-	chrX:465585:-	chrX	465585	465585	-	-2.64482	0.233045	NA	0.422762	0.817657	NA	-2.47492	0.270407	NA	-0.487028	0.80005	NA	-0.865119	0.643125	NA
chrX:466060:-	chrX:466060:-	chrX	466060	466060	-	1.36752	0.354615	0.862114	1.52779	0.310652	0.640506	0.727031	0.634268	0.92077	1.95135	0.188026	NA	0.149733	0.92272	0.979541
chrX:466118:-	chrX:466118:-	chrX	466118	466118	-	-0.442932	0.786357	NA	-2.50411	0.228123	NA	-2.03694	0.27022	NA	-0.435319	0.796516	NA	-1.42604	0.401561	NA
chrX:466204-466270:-	chrX:466223:-	chrX	466204	466270	-	-0.30056	0.180934	0.66946	0.207958	0.35506	0.677411	-0.209779	0.350649	0.778618	0.276122	0.219308	0.630828	-0.368643	0.100639	0.375375
chrX:466293-466342:-	chrX:466293:-	chrX	466293	466342	-	1.57888	0.222442	0.732893	1.62678	0.228558	0.554948	1.12256	0.406378	0.818993	0.235654	0.880388	0.972962	6.27577	1.4e-07	3.86e-06
chrX:466560:-	chrX:466560:-	chrX	466560	466560	-	-0.315956	0.892974	NA	1.97664	0.367999	NA	1.20289	0.586552	NA	-2.08922	0.414512	NA	0.710525	0.748803	NA
chrX:466660:-	chrX:466660:-	chrX	466660	466660	-	1.89161	0.383269	NA	1.97838	0.373018	NA	2.59941	0.224602	NA	2.95741	0.168412	NA	0.275984	0.905584	NA
chrX:466947:-	chrX:466947:-	chrX	466947	466947	-	0.840786	0.661046	NA	-1.24743	0.588828	NA	1.01709	0.596068	NA	-0.312223	0.881992	NA	-0.543112	0.787356	NA
chrX:467013:-	chrX:467013:-	chrX	467013	467013	-	0.50793	0.828118	NA	2.46402	0.264193	NA	1.29857	0.56624	NA	0.256077	0.918223	NA	2.51625	0.243776	NA
chrX:467034-467067:-	chrX:467055:-	chrX	467034	467067	-	-0.28739	0.199951	0.700181	0.132684	0.555513	0.81745	-0.117639	0.599956	0.909876	0.627141	0.0050545	0.0938792	-0.116415	0.602256	0.912539
chrX:468287-468331:-	chrX:468310:-	chrX	468287	468331	-	-0.306968	0.284714	0.806388	0.0369707	0.898333	0.968684	-0.418075	0.147984	0.540219	0.0237805	0.934509	0.983639	-0.783125	0.00670129	0.0509257
chrX:468468:-	chrX:468468:-	chrX	468468	468468	-	0.703104	0.772353	NA	-1.52928	0.579572	NA	-1.99128	0.473025	NA	-1.60171	0.559081	NA	-2.30714	0.399466	NA
chrX:469546-469647:-	chrX:469623:-	chrX	469546	469647	-	-0.122629	0.641559	0.970589	-0.0385918	0.884959	0.963958	-0.0978817	0.711038	0.941259	0.284412	0.282807	0.695254	-0.284886	0.2793	0.678313
chrX:470315-470316:-	chrX:470316:-	chrX	470315	470316	-	-1.13014	0.369023	0.872966	-1.19439	0.372947	0.693403	0.0102153	0.9932	0.999003	-1.31746	0.330187	NA	-0.932684	0.447974	0.819013
chrX:470396:-	chrX:470396:-	chrX	470396	470396	-	-1.23669	0.387146	0.886083	0.392593	0.769322	0.92133	0.329568	0.801482	0.966998	0.364931	0.785251	NA	-0.384128	0.7728	0.948208
chrX:470419:-	chrX:470419:-	chrX	470419	470419	-	0.460872	0.719728	0.98496	1.70905	0.173785	0.48381	1.2655	0.312894	0.748113	0.368041	0.784314	NA	0.869347	0.488249	0.845925
chrX:470458-470474:-	chrX:470473:-	chrX	470458	470474	-	0.253205	0.841333	0.98946	1.79726	0.141867	0.434499	1.38156	0.257609	0.693926	0.921697	0.466528	NA	1.51991	0.207181	0.579252
chrX:470545:-	chrX:470545:-	chrX	470545	470545	-	-0.327945	0.862908	NA	-1.93443	0.393494	NA	-0.466521	0.808763	NA	-0.48605	0.806317	NA	-1.86829	0.364122	NA
chrX:470772:-	chrX:470772:-	chrX	470772	470772	-	-0.612353	0.602931	0.964942	-0.976459	0.440954	0.745946	-0.973819	0.423725	0.830162	-0.359365	0.765783	NA	-0.362315	0.753666	0.948208
chrX:470794:-	chrX:470794:-	chrX	470794	470794	-	0.584265	0.646891	0.970718	-1.24681	0.429174	0.736424	0.715094	0.576081	0.900529	0.318068	0.812253	NA	0.869201	0.48876	0.846372
chrX:470829:-	chrX:470829:-	chrX	470829	470829	-	0.453562	0.791843	NA	-3.66695	0.0953612	NA	-1.13652	0.540383	NA	-2.18357	0.305653	NA	-0.0649926	0.970093	NA
chrX:470926:-	chrX:470926:-	chrX	470926	470926	-	-1.48201	0.406333	NA	-2.35905	0.264087	NA	-1.24707	0.483664	NA	-1.54743	0.418243	NA	0.186792	0.909043	NA
chrX:470956-471009:-	chrX:470980:-	chrX	470956	471009	-	-0.619136	0.00668423	0.0787941	-0.888011	0.000140293	0.00403284	-0.430559	0.0593209	0.330198	-0.358872	0.118866	0.498754	-0.153578	0.497531	0.852015
chrX:471387:-	chrX:471387:-	chrX	471387	471387	-	-1.26686	0.563087	NA	0.221668	0.915225	NA	0.0202832	0.992117	NA	0.894384	0.658445	NA	0.698859	0.724855	NA
chrX:471633-471641:-	chrX:471633:-	chrX	471633	471641	-	-0.714609	0.359697	0.866816	-1.36603	0.107268	0.3746	-2.05854	0.0171053	0.147804	0.0896372	0.908129	0.979426	-0.280821	0.71322	0.948208
chrX:471676-471726:-	chrX:471714:-	chrX	471676	471726	-	-0.609452	0.00178964	0.0301113	-1.41719	1.98e-12	4.8e-10	-0.526051	0.0071075	0.0815603	-0.149249	0.445838	0.807695	-0.38231	0.0490932	0.230618
chrX:471753-471838:-	chrX:471804:-	chrX	471753	471838	-	-0.642437	0.00584784	0.0715626	-0.917016	0.000125473	0.00369781	-0.678238	0.00377924	0.052967	-0.354402	0.131759	0.519688	-0.341536	0.139755	0.460826
chrX:472316-472330:-	chrX:472316:-	chrX	472316	472330	-	1.87134	0.240697	0.756892	-0.678666	0.743539	0.909658	1.16376	0.481903	0.862829	1.95494	0.230452	NA	3.8975	0.0113584	0.0770441
chrX:472377-472485:-	chrX:472452:-	chrX	472377	472485	-	-0.1269	0.657389	0.973648	-1.78116	6.53e-08	6.76e-06	0.516057	0.0683119	0.359246	-0.0967731	0.740882	0.929603	1.7757	1.51e-10	6.56e-09
chrX:484239:-	chrX:484239:-	chrX	484239	484239	-	-0.445384	0.825013	NA	2.47665	0.16895	NA	1.08047	0.559832	NA	-0.829008	0.707744	NA	0.439543	0.814557	NA
chrX:484281-484308:-	chrX:484298:-	chrX	484281	484308	-	3.91592	0.00023982	0.00626996	3.36612	0.00198054	0.0282457	2.89806	0.00769402	0.0862909	3.40357	0.00173873	0.0463911	0.56491	0.633978	0.927924
chrX:484342:-	chrX:484342:-	chrX	484342	484342	-	3.54154	0.0719157	0.399161	2.85055	0.158267	NA	2.52754	0.208698	NA	2.6732	0.187905	NA	-2.11708	0.380402	0.774578
chrX:484601:-	chrX:484601:-	chrX	484601	484601	-	2.05367	0.480591	NA	2.71639	0.351155	NA	1.38514	0.640398	NA	-1.16988	0.713823	NA	-2.03498	0.523532	NA
chrX:484649:-	chrX:484649:-	chrX	484649	484649	-	4.4719	0.00665329	0.0785424	4.6501	0.00501081	0.0534563	3.83507	0.0211934	0.170321	1.74497	0.341135	NA	0.340789	0.859143	0.964031
chrX:486229-486265:-	chrX:486255:-	chrX	486229	486265	-	0.0127434	0.968969	0.997489	-0.228418	0.500043	0.785409	-0.277849	0.403352	0.816878	0.20368	0.540305	0.851294	-0.0785882	0.809961	0.94869
chrX:487177:-	chrX:487177:-	chrX	487177	487177	-	4.54275	0.0536605	NA	2.60389	0.306271	NA	2.7886	0.257169	NA	1.76682	0.508524	NA	1.80709	0.475181	NA
chrX:487206:-	chrX:487206:-	chrX	487206	487206	-	3.70861	0.117035	NA	-1.24785	0.650111	NA	2.01919	0.405903	NA	-1.28025	0.641657	NA	-2.14534	0.435475	NA
chrX:487407:-	chrX:487407:-	chrX	487407	487407	-	4.00191	0.062832	NA	1.67557	0.506193	NA	3.52043	0.107515	NA	4.83521	0.0242241	NA	1.80399	0.437896	NA
chrX:488977:-	chrX:488977:-	chrX	488977	488977	-	3.71305	0.168444	NA	4.14719	0.125678	NA	2.78878	0.313109	NA	1.59481	0.591685	NA	-0.639523	0.831485	NA
chrX:489135-489156:-	chrX:489135:-	chrX	489135	489156	-	6.60044	1.25e-05	0.000564729	4.63269	0.00261089	0.0343135	5.72654	0.000159756	0.00482835	1.7748	0.303218	0.708032	0.392017	0.828786	0.954437
chrX:490842:-	chrX:490842:-	chrX	490842	490842	-	0.102894	0.956958	NA	1.10594	0.556526	NA	0.632249	0.736447	NA	-0.226194	0.911642	NA	0.500511	0.787907	NA
chrX:490869-490911:-	chrX:490883:-	chrX	490869	490911	-	0.183881	0.596973	0.964026	-0.137209	0.700037	0.889447	-0.270734	0.442367	0.842466	-0.286534	0.423191	0.795133	-0.38598	0.270448	0.666375
chrX:493321:-	chrX:493321:-	chrX	493321	493321	-	4.29786	0.102609	NA	3.70627	0.168399	NA	3.51732	0.188017	NA	0.225578	0.939391	NA	-0.63952	0.829329	NA
chrX:493353:-	chrX:493353:-	chrX	493353	493353	-	2.64693	0.202418	NA	1.21717	0.59044	NA	2.71818	0.191672	NA	0.127671	0.958253	NA	1.5502	0.465891	NA
chrX:493375:-	chrX:493375:-	chrX	493375	493375	-	4.15813	0.162436	NA	2.70525	0.384261	NA	2.19607	0.480091	NA	0.225578	0.945041	NA	-0.639519	0.845053	NA
chrX:493484-493513:-	chrX:493484:-	chrX	493484	493513	-	6.42652	0.000109476	0.00331149	6.47517	0.000105172	0.00321691	6.2476	0.000176124	0.0052399	1.63225	0.444992	NA	-0.639516	0.77019	0.948208
chrX:496443-496509:-	chrX:496478:-	chrX	496443	496509	-	0.0724789	0.789971	0.987504	0.16542	0.547733	0.813249	-0.267698	0.329871	0.762316	-0.426244	0.127233	0.512648	-0.81982	0.00294935	0.0263878
chrX:497124-497139:-	chrX:497139:-	chrX	497124	497139	-	-0.965032	0.375716	0.878585	-1.22049	0.308953	0.639486	-0.544207	0.611723	0.914618	0.267762	0.798676	NA	1.56671	0.109741	0.395516
chrX:497178-497182:-	chrX:497182:-	chrX	497178	497182	-	-0.244975	0.710813	0.984436	-0.219224	0.750541	0.912734	0.279864	0.667163	0.93148	0.431802	0.513602	0.840105	1.28006	0.0407547	0.202106
chrX:497235:-	chrX:497235:-	chrX	497235	497235	-	0.588424	0.65758	0.973687	-0.629417	0.678041	0.879707	-0.316387	0.822318	0.970862	0.114621	0.935359	NA	1.61123	0.210083	0.583276
chrX:499747-499754:-	chrX:499754:-	chrX	499747	499754	-	5.00318	0.0180329	0.155595	4.77032	0.0260458	NA	3.52712	0.105983	NA	1.61047	0.518481	NA	-0.639515	0.800839	0.948208
chrX:499808-499813:-	chrX:499808:-	chrX	499808	499813	-	3.81553	0.00456693	0.0604226	3.58417	0.00858511	0.0778232	3.01313	0.0273517	0.201411	1.15259	0.447448	NA	0.991409	0.493176	0.849314
chrX:499846:-	chrX:499846:-	chrX	499846	499846	-	4.29792	0.0970444	NA	3.70615	0.161782	NA	1.20029	0.681859	NA	0.225583	0.938606	NA	0.881695	0.760566	NA
chrX:501384-501405:-	chrX:501397:-	chrX	501384	501405	-	4.16057	4.48e-05	0.0015945	3.70011	0.000357982	0.00823424	3.89786	0.000142537	0.00441302	3.23508	0.00201522	0.0511574	0.374349	0.747493	0.948208
chrX:502143:-	chrX:502143:-	chrX	502143	502143	-	4.63351	0.0624709	NA	2.59748	0.330935	NA	4.20856	0.0929976	NA	1.78276	0.52295	NA	0.875355	0.755411	NA
chrX:502282:-	chrX:502282:-	chrX	502282	502282	-	4.69317	0.0226437	NA	4.04877	0.055982	NA	4.0067	0.0554464	NA	2.66736	0.238413	NA	0.843388	0.730058	NA
chrX:502372:-	chrX:502372:-	chrX	502372	502372	-	5.33876	0.00952973	0.101071	3.31918	0.130435	NA	3.78871	0.0735916	NA	3.43986	0.114574	NA	0.844555	0.730973	0.948208
chrX:503510-503562:-	chrX:503545:-	chrX	503510	503562	-	0.0504129	0.889328	0.990962	-0.0981271	0.791922	0.931222	-1.00258	0.00811929	0.0895485	-0.110821	0.765741	0.939126	-1.05026	0.00484977	0.0394401
chrX:503722-503749:-	chrX:503749:-	chrX	503722	503749	-	-0.573576	0.454322	0.917787	-1.15956	0.169738	0.477493	-1.36456	0.0964891	0.435877	0.142356	0.852458	0.966014	-0.074076	0.920767	0.979226
chrX:507503-507540:-	chrX:507527:-	chrX	507503	507540	-	-0.843502	0.032202	0.23505	-1.46244	0.000952464	0.0167412	0.0139328	0.970825	0.995204	-0.458567	0.253475	0.66555	1.71481	2.33e-06	5.05e-05
chrX:507566:-	chrX:507566:-	chrX	507566	507566	-	-0.439508	0.746282	0.986786	-0.525569	0.720073	0.898369	-0.219918	0.871234	0.977255	0.447572	0.737862	NA	2.3116	0.0573716	0.256579
chrX:510688:-	chrX:510688:-	chrX	510688	510688	-	1.68937	0.34356	NA	1.98225	0.272233	NA	1.34301	0.4591	NA	-0.715893	0.742344	NA	-0.00771455	0.996763	NA
chrX:511579:-	chrX:511579:-	chrX	511579	511579	-	5.6528	0.0046831	0.0614885	2.7001	0.22504	NA	4.66187	0.0213402	NA	0.225588	0.926583	NA	0.840079	0.727461	0.948208
chrX:511643:-	chrX:511643:-	chrX	511643	511643	-	4.71496	0.076866	NA	2.70421	0.338557	NA	3.19558	0.242206	NA	0.225581	0.940144	NA	-0.639517	0.831423	NA
chrX:512307:-	chrX:512307:-	chrX	512307	512307	-	4.32524	0.0838301	NA	2.70344	0.310009	NA	3.78682	0.134351	NA	0.225586	0.936948	NA	-0.639512	0.822555	NA
chrX:513781-513783:-	chrX:513783:-	chrX	513781	513783	-	0.483417	0.492214	0.931646	0.521124	0.470414	0.767019	0.0763372	0.915571	0.982984	-0.456184	0.551267	0.856659	0.22515	0.749601	0.948208
chrX:513810-513860:-	chrX:513811:-	chrX	513810	513860	-	0.426735	0.164637	0.639833	0.39722	0.200551	0.520242	0.451336	0.142444	0.530508	-0.257975	0.412625	0.789027	0.315888	0.303241	0.706863
chrX:516412:-	chrX:516412:-	chrX	516412	516412	-	3.39819	0.195154	NA	4.38199	0.0931447	NA	3.52762	0.179303	NA	0.225581	0.938566	NA	-0.639517	0.82704	NA
chrX:516462:-	chrX:516462:-	chrX	516462	516462	-	4.03666	0.133733	NA	3.63947	0.184952	NA	2.1965	0.438456	NA	0.225577	0.940305	NA	0.887736	0.765564	NA
chrX:517077:-	chrX:517077:-	chrX	517077	517077	-	-2.76126	0.278607	NA	1.32824	0.550782	NA	-0.10913	0.96272	NA	1.75628	0.423467	NA	0.409981	0.854036	NA
chrX:517471:-	chrX:517471:-	chrX	517471	517471	-	-0.301297	0.869301	0.98946	-0.516933	0.791272	NA	0.900656	0.608551	NA	0.903235	0.613442	NA	0.293988	0.868129	0.966258
chrX:517496-517597:-	chrX:517547:-	chrX	517496	517597	-	-0.17086	0.498563	0.935343	-0.292266	0.253153	0.583126	-0.125779	0.619015	0.91657	0.303352	0.230889	0.644776	-0.0782828	0.755805	0.948208
chrX:517660-517679:-	chrX:517679:-	chrX	517660	517679	-	0.292678	0.573915	0.961092	-0.372865	0.504388	0.787744	0.660281	0.20222	0.626373	0.217201	0.686153	0.912363	-0.409792	0.440302	0.812608
chrX:517704-517721:-	chrX:517712:-	chrX	517704	517721	-	0.898874	0.164963	0.640741	-0.212894	0.763884	0.918717	0.587507	0.372031	0.794602	0.037249	0.95722	0.988279	-0.0327169	0.960721	0.989701
chrX:517894:-	chrX:517894:-	chrX	517894	517894	-	1.57206	0.420961	0.905858	1.7364	0.387894	0.705765	-1.70971	0.461561	0.854126	1.33565	0.517228	NA	5.39151	0.00318768	0.0280634
chrX:518369:-	chrX:518369:-	chrX	518369	518369	-	-0.445627	0.898708	NA	1.78124	0.608475	NA	-0.240837	0.945153	NA	0.225585	0.948621	NA	4.79224	0.135512	NA
chrX:518558:-	chrX:518558:-	chrX	518558	518558	-	-1.98999	0.233327	0.747135	-3.72753	0.0567749	0.265111	-4.22634	0.0307749	0.216639	-0.791948	0.614318	NA	2.52225	0.0592257	0.262005
chrX:518738:-	chrX:518738:-	chrX	518738	518738	-	-4.43151	0.022528	0.182582	-2.26558	0.235411	NA	-1.78404	0.280486	0.717481	0.202204	0.887911	NA	1.96744	0.137081	0.454779
chrX:519156:-	chrX:519156:-	chrX	519156	519156	-	0.725178	0.649992	NA	-0.679775	0.71044	NA	0.408922	0.801961	NA	0.299868	0.858576	NA	-1.57797	0.388784	NA
chrX:519193-519295:-	chrX:519277:-	chrX	519193	519295	-	-0.150712	0.429427	0.909226	-0.151587	0.430132	0.736985	-0.0980208	0.607754	0.912983	0.0724651	0.705288	0.919065	-0.436394	0.0222507	0.130409
chrX:519321-519335:-	chrX:519321:-	chrX	519321	519335	-	-0.549493	0.481274	0.927652	-0.385028	0.634164	0.858893	-0.120971	0.875282	0.978468	0.506356	0.508298	0.837023	-1.33194	0.10108	0.376565
chrX:519657:-	chrX:519657:-	chrX	519657	519657	-	1.22666	0.502593	NA	-1.25157	0.578231	NA	1.21031	0.510589	NA	-1.37765	0.537814	NA	-0.546577	0.779025	NA
chrX:519711:-	chrX:519711:-	chrX	519711	519711	-	0.0191889	0.993305	NA	0.593312	0.79623	NA	-1.78204	0.493942	NA	-1.38362	0.590055	NA	0.00273973	0.999039	NA
chrX:519738-519792:-	chrX:519738:-	chrX	519738	519792	-	0.0638412	0.903944	0.993278	-0.112062	0.838854	0.949568	0.156675	0.767986	0.956444	-0.775094	0.178855	0.585677	-0.434904	0.416611	0.797809
chrX:519832:-	chrX:519832:-	chrX	519832	519832	-	1.52537	0.457359	NA	1.20017	0.571069	NA	0.753867	0.721352	NA	-2.2196	0.365966	NA	-0.50889	0.818135	NA
chrX:519857-519907:-	chrX:519907:-	chrX	519857	519907	-	0.254748	0.600699	0.964942	0.641223	0.192488	0.509922	0.335711	0.492009	0.866275	0.319589	0.521256	0.842457	-0.106304	0.828065	0.954413
chrX:519953-519995:-	chrX:519953:-	chrX	519953	519995	-	0.172307	0.810407	0.987504	1.05714	0.138036	0.428488	0.449925	0.529663	0.882992	0.822702	0.252806	0.664746	-0.165354	0.819149	0.951452
chrX:520020-520031:-	chrX:520031:-	chrX	520020	520031	-	-0.247932	0.773914	0.987504	0.447082	0.604614	0.845214	-0.595097	0.503698	0.873647	0.126269	0.885526	0.974056	-0.30144	0.725278	0.948208
chrX:520053:-	chrX:520053:-	chrX	520053	520053	-	1.09085	0.476342	0.925407	0.580194	0.718633	NA	-0.18185	0.911541	NA	-0.718646	0.687828	NA	0.0658225	0.966746	0.990958
chrX:520078-520080:-	chrX:520078:-	chrX	520078	520080	-	-0.630212	0.611917	0.96589	-0.426903	0.738031	0.90693	-1.42639	0.280979	0.717617	-0.832019	0.52551	NA	-1.14304	0.365442	0.764489
chrX:520112:-	chrX:520112:-	chrX	520112	520112	-	-0.49134	0.776353	NA	-0.139956	0.936384	NA	-3.0797	0.158305	NA	-1.80394	0.35959	NA	-1.39554	0.434154	NA
chrX:520164-520174:-	chrX:520170:-	chrX	520164	520174	-	0.271406	0.765611	0.987276	0.331777	0.72439	0.900599	-0.308445	0.745262	0.948993	0.446666	0.632273	NA	-0.0971931	0.91565	0.978033
chrX:520248:-	chrX:520248:-	chrX	520248	520248	-	-0.0868904	0.951993	0.996084	-0.555987	0.714564	NA	-1.401	0.367917	NA	-2.88495	0.133852	NA	-2.90144	0.0947589	0.361247
chrX:520374-520385:-	chrX:520385:-	chrX	520374	520385	-	-0.769309	0.600993	0.964942	-1.61128	0.318613	NA	-2.14223	0.186098	NA	-2.26322	0.189188	NA	-5.56714	0.00544526	0.0431923
chrX:520419-520453:-	chrX:520436:-	chrX	520419	520453	-	0.333081	0.713801	0.984606	0.169493	0.857623	0.955178	-0.425806	0.654024	0.927407	-0.824632	0.417501	NA	-0.599427	0.522856	0.867479
chrX:520635:-	chrX:520635:-	chrX	520635	520635	-	2.02689	0.363407	NA	2.35417	0.296635	NA	1.79739	0.426412	NA	2.27998	0.313072	NA	1.82754	0.412637	NA
chrX:520713-520816:-	chrX:520799:-	chrX	520713	520816	-	0.694184	0.143644	0.598664	0.898056	0.0630581	0.280884	0.713249	0.135207	0.517308	-0.305788	0.554799	0.858053	-0.378972	0.440891	0.812969
chrX:520838:-	chrX:520838:-	chrX	520838	520838	-	-0.241053	0.916634	NA	-0.180918	0.938693	NA	-1.39359	0.567412	NA	-1.99355	0.443962	NA	-2.83276	0.279118	NA
chrX:521157:-	chrX:521157:-	chrX	521157	521157	-	1.68897	0.348112	NA	2.23182	0.217023	NA	0.757183	0.686681	NA	-2.2166	0.325567	NA	-0.0951797	0.96063	NA
chrX:521184-521197:-	chrX:521197:-	chrX	521184	521197	-	0.958965	0.469335	0.92453	0.308487	0.825054	0.944117	-0.334961	0.811843	0.968724	-0.350995	0.809493	NA	-0.394177	0.775402	0.948208
chrX:521230-521231:-	chrX:521231:-	chrX	521230	521231	-	1.2238	0.25431	0.772313	0.275384	0.809603	0.93792	-0.431648	0.70933	0.94124	-1.43469	0.284384	NA	-1.20103	0.313118	0.718046
chrX:521268-521289:-	chrX:521268:-	chrX	521268	521289	-	1.09089	0.289654	0.810664	0.794958	0.458327	0.758534	0.974371	0.349115	0.77809	1.01801	0.336537	NA	-0.393074	0.718424	0.948208
chrX:521317-521388:-	chrX:521379:-	chrX	521317	521388	-	1.30137	0.0171937	0.150842	0.765058	0.1795	0.492001	0.570399	0.310266	0.745286	0.265042	0.650777	0.900696	-1.00443	0.0954791	0.363007
chrX:521435-521442:-	chrX:521439:-	chrX	521435	521442	-	0.619317	0.240025	0.756129	-0.719858	0.212974	0.535983	-0.327601	0.549623	0.890125	-0.985376	0.0945256	0.450806	-1.08912	0.0509947	0.236515
chrX:521504:-	chrX:521504:-	chrX	521504	521504	-	3.86422	0.115802	NA	3.32811	0.189248	NA	3.20777	0.200152	NA	2.68034	0.303725	NA	0.871597	0.752374	NA
chrX:521577:-	chrX:521577:-	chrX	521577	521577	-	1.99084	0.405782	NA	2.97455	0.211398	NA	-0.203114	0.940541	NA	2.54536	0.289492	NA	-0.642079	0.812051	NA
chrX:521605:-	chrX:521605:-	chrX	521605	521605	-	1.13345	0.332019	0.845165	0.289244	0.813842	0.940059	-0.880606	0.491327	0.865916	-0.631688	0.627582	NA	-1.75002	0.188559	0.547693
chrX:521626-521761:-	chrX:521741:-	chrX	521626	521761	-	-0.0104069	0.962222	0.997489	0.284182	0.196628	0.515092	-0.0986173	0.65391	0.927407	0.0571956	0.795194	0.947962	-0.71958	0.0010844	0.0114916
chrX:523814:-	chrX:523814:-	chrX	523814	523814	-	1.84694	0.403992	NA	1.2936	0.581315	NA	2.11704	0.337783	NA	-1.1823	0.643936	NA	3.03126	0.158948	NA
chrX:524103-524104:-	chrX:524104:-	chrX	524103	524104	-	0.224966	0.654921	0.972976	0.0349643	0.947204	0.98378	0.617763	0.216324	0.644408	-0.8694	0.126815	0.512449	2.28926	1.8e-06	4e-05
chrX:524508-524533:-	chrX:524508:-	chrX	524508	524533	-	-0.305912	0.536321	0.950121	-0.540823	0.30362	0.634644	0.0310654	0.949608	0.989733	0.0799622	0.873601	0.972389	0.733702	0.121827	0.422072
chrX:524562-524591:-	chrX:524566:-	chrX	524562	524591	-	-0.229723	0.566681	0.959755	0.0446985	0.912814	0.973283	-0.640214	0.120208	0.488404	-0.532919	0.20578	0.617976	0.581075	0.136451	0.453798
chrX:525375-525595:-	chrX:525410:-	chrX	525375	525595	-	-0.553763	0.0356998	0.251503	0.0750825	0.775917	0.924637	-0.595907	0.024028	0.184853	0.1815	0.491122	0.82887	0.719477	0.00607245	0.0471509
chrX:526735:-	chrX:526735:-	chrX	526735	526735	-	-0.445637	0.911016	NA	0.257967	0.948418	NA	1.20629	0.762198	NA	0.225574	0.954888	NA	4.25914	0.255183	NA
chrX:526761-526803:-	chrX:526787:-	chrX	526761	526803	-	-1.19631	0.0287689	0.216852	-0.319861	0.552667	0.815672	-0.50398	0.337464	0.768735	-1.30254	0.0290704	0.256301	2.22972	2.58e-06	5.53e-05
chrX:526991:-	chrX:526991:-	chrX	526991	526991	-	1.05617	0.730113	NA	3.33282	0.241877	NA	-0.240839	0.937775	NA	0.225584	0.941709	NA	4.50278	0.102356	NA
chrX:527034:-	chrX:527034:-	chrX	527034	527034	-	2.6146	0.17921	0.666499	2.28819	0.255783	NA	2.95682	0.12756	NA	1.40342	0.506812	NA	3.0574	0.111901	0.400452
chrX:527095:-	chrX:527095:-	chrX	527095	527095	-	3.93813	0.0866442	NA	3.32486	0.163274	NA	4.00831	0.0819101	NA	2.46455	0.322785	NA	0.860189	0.74327	NA
chrX:527518:-	chrX:527518:-	chrX	527518	527518	-	3.8292	0.150944	NA	3.41127	0.211475	NA	2.20711	0.430899	NA	3.53694	0.193396	NA	1.65043	0.558976	NA
chrX:527916:-	chrX:527916:-	chrX	527916	527916	-	4.99121	0.00222904	0.0356026	4.36803	0.00827615	0.0758892	3.06966	0.0677794	0.357344	2.50053	0.151657	NA	2.10662	0.218004	0.595663
chrX:528040:-	chrX:528040:-	chrX	528040	528040	-	-1.36737	0.560863	NA	0.401464	0.857314	NA	-0.170974	0.939112	NA	-3.14122	0.220344	NA	-1.41337	0.544131	NA
chrX:528435-528548:-	chrX:528494:-	chrX	528435	528548	-	-0.31956	0.235227	0.750102	0.0201887	0.940361	0.981307	-0.415837	0.123121	0.495457	0.335962	0.212184	0.624657	-0.50588	0.0602349	0.265328
chrX:529616-529676:-	chrX:529642:-	chrX	529616	529676	-	0.155327	0.742028	0.986353	-0.119326	0.815139	0.940223	0.269315	0.570328	0.898124	-0.199465	0.697224	0.916801	3.33305	1.36e-14	1.03e-12
chrX:529697:-	chrX:529697:-	chrX	529697	529697	-	-1.38177	0.504053	0.937298	0.898257	0.603794	0.844892	0.425967	0.80521	0.967796	-0.739273	0.716839	NA	4.26341	0.00519701	0.041627
chrX:535669-535681:-	chrX:535673:-	chrX	535669	535681	-	0.230483	0.816985	0.987733	-0.56331	0.625679	0.855644	-0.033011	0.974468	0.995305	-1.03342	0.400751	0.781202	3.31097	0.000263278	0.00340436
chrX:535704:-	chrX:535704:-	chrX	535704	535704	-	-0.312472	0.832892	0.988362	-1.26095	0.500463	0.785642	0.575971	0.679353	0.934006	-1.26297	0.489924	NA	4.76916	0.00012313	0.00175435
chrX:535741-535791:-	chrX:535757:-	chrX	535741	535791	-	-0.0116067	0.979915	0.998767	-0.119434	0.808539	0.937629	0.387865	0.394409	0.811296	-0.248916	0.61693	0.88816	3.50233	5.97e-17	5.97e-15
chrX:539323:-	chrX:539323:-	chrX	539323	539323	-	2.00088	0.511867	NA	0.25797	0.936076	NA	2.20754	0.469165	NA	0.225578	0.944089	NA	4.46955	0.123713	NA
chrX:540307:-	chrX:540307:-	chrX	540307	540307	-	-1.45053	0.439888	NA	-0.19159	0.914645	NA	0.337571	0.841059	NA	-3.22179	0.131685	NA	1.02383	0.529499	NA
chrX:540462-540538:-	chrX:540492:-	chrX	540462	540538	-	-0.392089	0.318003	0.8352	-0.457464	0.263486	0.594048	-0.44333	0.264354	0.701306	-0.0931625	0.815799	0.955074	-0.13472	0.727251	0.948208
chrX:541912:-	chrX:541912:-	chrX	541912	541912	-	1.00361	0.690627	NA	-2.19092	0.440248	NA	1.07098	0.671924	NA	-0.0218169	0.993522	NA	-1.69297	0.547843	NA
chrX:542077:-	chrX:542077:-	chrX	542077	542077	-	2.75766	0.275006	NA	0.268136	0.92512	NA	-0.200201	0.944348	NA	1.78425	0.496551	NA	-2.04004	0.477001	NA
chrX:542103:-	chrX:542103:-	chrX	542103	542103	-	0.962632	0.768842	NA	3.63682	0.232404	NA	3.78911	0.208454	NA	0.225581	0.945299	NA	-0.639515	0.845775	NA
chrX:542626-542706:-	chrX:542698:-	chrX	542626	542706	-	-0.43105	0.0435667	0.28844	-0.644567	0.00329496	0.0401135	-0.311228	0.145754	0.536357	0.0343393	0.872937	0.972389	0.341294	0.104725	0.38503
chrX:542827-542830:-	chrX:542827:-	chrX	542827	542830	-	0.578997	0.780992	0.987504	1.28236	0.538046	0.806693	1.36916	0.493102	0.866727	1.38422	0.501476	NA	4.95121	0.00675068	0.0511902
chrX:543056:-	chrX:543056:-	chrX	543056	543056	-	-0.0331838	0.958427	0.997213	-0.23788	0.726054	0.901324	0.567732	0.363202	0.788071	-0.272969	0.687741	0.912363	2.80663	2.05e-06	4.49e-05
chrX:543797-543879:-	chrX:543865:-	chrX	543797	543879	-	-0.300359	0.530514	0.948611	0.288341	0.549914	0.814307	0.326766	0.485309	0.863715	0.346808	0.469849	0.817542	1.9142	1.65e-05	0.000299264
chrX:544360-544370:-	chrX:544360:-	chrX	544360	544370	-	0.973105	0.702561	0.983009	0.257997	0.919902	NA	-0.240819	0.925219	NA	0.225604	0.929931	NA	6.52429	0.00220177	0.0207531
chrX:544404:-	chrX:544404:-	chrX	544404	544404	-	-0.445631	0.903839	NA	0.257974	0.944243	NA	1.20589	0.743651	NA	0.225581	0.951235	NA	4.62182	0.176145	NA
chrX:544955-544956:-	chrX:544956:-	chrX	544955	544956	-	-0.069218	0.947732	0.99582	0.429392	0.687036	0.883908	0.0209726	0.984231	0.998253	-1.39911	0.257284	NA	-0.0405546	0.969094	0.991261
chrX:545109:-	chrX:545109:-	chrX	545109	545109	-	-1.22907	0.536408	NA	-0.641321	0.748285	NA	-3.08513	0.189468	NA	-4.06004	0.0843304	NA	-2.61591	0.222339	NA
chrX:545141:-	chrX:545141:-	chrX	545141	545141	-	-0.514068	0.751408	0.986786	0.707399	0.655229	NA	-1.65815	0.358887	NA	-0.176133	0.915311	NA	-0.81874	0.616138	0.91942
chrX:545173-545287:-	chrX:545213:-	chrX	545173	545287	-	-0.478026	0.0271735	0.208322	-1.05197	1.54e-06	0.000105912	-0.594959	0.00607152	0.0737351	-0.206078	0.342316	0.741808	-0.0311052	0.885374	0.970736
chrX:545325-545340:-	chrX:545340:-	chrX	545325	545340	-	0.293052	0.7099	0.984436	0.922505	0.242937	0.572224	-0.385519	0.639282	0.92259	-0.0559435	0.946294	0.985669	-0.837809	0.310201	0.715006
chrX:545363-545398:-	chrX:545370:-	chrX	545363	545398	-	0.111017	0.840275	0.989452	0.043953	0.938724	0.981072	-0.653131	0.25924	0.695578	0.0901502	0.874226	0.972389	-1.10662	0.0569319	0.255078
chrX:545427-545458:-	chrX:545429:-	chrX	545427	545458	-	0.148407	0.647024	0.970718	0.0931716	0.780067	0.925771	-0.0709355	0.829193	0.972751	0.194393	0.558052	0.859308	1.59815	3.72e-07	9.34e-06
chrX:545482:-	chrX:545482:-	chrX	545482	545482	-	1.02883	0.683987	0.979257	0.257993	0.919499	NA	-0.240823	0.92484	NA	1.60969	0.521695	NA	6.41694	0.00242682	0.0224431
chrX:545590:-	chrX:545590:-	chrX	545590	545590	-	0.439183	0.846002	0.98946	0.193828	0.936939	NA	-0.279259	0.909915	NA	2.07933	0.331363	NA	4.14183	0.0405923	0.201709
chrX:548312-548335:-	chrX:548335:-	chrX	548312	548335	-	2.35466	0.113759	0.530331	0.86962	0.599953	0.842627	1.57386	0.305932	0.742665	0.335411	0.847088	NA	3.73367	0.0102887	0.0711972
chrX:548386-548406:-	chrX:548404:-	chrX	548386	548406	-	0.72266	0.356362	0.863306	0.718115	0.376876	0.696535	1.19066	0.12473	0.498191	-0.942931	0.32225	0.725388	2.6419	0.000402683	0.00491215
chrX:552898-552928:-	chrX:552913:-	chrX	552898	552928	-	3.86341	8.08e-07	5.56e-05	3.36596	2.45e-05	0.00102198	3.53921	7.1e-06	0.000402466	0.924269	0.304781	0.710045	-0.641668	0.509648	0.859202
chrX:554822-554885:-	chrX:554858:-	chrX	554822	554885	-	-0.0163735	0.94008	0.995529	-0.195042	0.379908	0.698934	-0.253544	0.248336	0.684261	0.242614	0.269346	0.682893	-0.455678	0.0372915	0.190076
chrX:555629-555643:-	chrX:555643:-	chrX	555629	555643	-	1.48851	0.249542	0.766717	0.701394	0.620427	0.853123	0.792839	0.557966	0.892255	0.74089	0.598444	NA	4.39941	0.000339026	0.00425779
chrX:557828-557837:-	chrX:557837:-	chrX	557828	557837	-	-1.30675	0.389221	0.887282	-0.75539	0.621511	NA	-2.14524	0.188455	0.608706	-1.13664	0.467462	NA	-0.656737	0.654564	0.935496
chrX:557860-557880:-	chrX:557880:-	chrX	557860	557880	-	-0.422934	0.791605	0.987504	0.116915	0.942355	NA	1.22067	0.419656	NA	-1.0204	0.566487	NA	0.0850402	0.956188	0.98865
chrX:558364:-	chrX:558364:-	chrX	558364	558364	-	2.61368	0.236765	NA	2.70074	0.238139	NA	4.00836	0.0587715	NA	4.46023	0.0356355	NA	2.34623	0.290007	NA
chrX:558738:-	chrX:558738:-	chrX	558738	558738	-	-0.890352	0.625992	NA	-2.40734	0.27405	NA	-0.940177	0.611189	NA	-0.214315	0.906664	NA	-1.11451	0.542455	NA
chrX:558859:-	chrX:558859:-	chrX	558859	558859	-	1.08777	0.326545	0.840893	1.32898	0.238201	0.566502	0.173526	0.881436	0.979623	0.6118	0.599855	NA	0.439478	0.696459	0.948208
chrX:558991:-	chrX:558991:-	chrX	558991	558991	-	2.10137	0.477688	NA	-1.1369	0.725328	NA	-1.63572	0.613207	NA	0.434542	0.891447	NA	1.85893	0.530278	NA
chrX:559015-559016:-	chrX:559016:-	chrX	559015	559016	-	-0.696789	0.604853	0.964942	-0.516392	0.709303	0.894274	-0.285808	0.830407	0.972751	-2.28588	0.165522	NA	-0.879734	0.513449	0.861612
chrX:559143-559225:-	chrX:559184:-	chrX	559143	559225	-	-0.00338203	0.986015	0.999471	-0.126671	0.51354	0.793576	-0.153591	0.426803	0.831746	0.0984224	0.611136	0.884853	-0.455324	0.0184309	0.112977
chrX:565268:-	chrX:565268:-	chrX	565268	565268	-	-0.432821	0.884221	NA	-1.14047	0.702527	NA	0.803408	0.774679	NA	0.404138	0.890373	NA	2.69964	0.30929	NA
chrX:567415-567481:-	chrX:567450:-	chrX	567415	567481	-	-0.328215	0.0759706	0.412381	-0.177984	0.338558	0.663554	-0.174985	0.34428	0.774285	0.361351	0.0507608	0.339389	-0.18729	0.310082	0.714835
chrX:567503-567506:-	chrX:567503:-	chrX	567503	567506	-	-0.411072	0.658882	0.97406	-0.40497	0.676927	0.879158	-0.0949608	0.918323	0.983342	0.588736	0.521354	NA	-0.34752	0.705727	0.948208
chrX:568886:-	chrX:568886:-	chrX	568886	568886	-	2.69402	0.232301	NA	1.38882	0.56483	NA	2.60607	0.250382	NA	-1.18026	0.653792	NA	1.76356	0.441501	NA
chrX:569051-569097:-	chrX:569087:-	chrX	569051	569097	-	0.646603	0.161701	0.634508	0.204944	0.673264	0.877577	1.12173	0.0144288	0.131093	-0.416199	0.411858	0.789027	0.375099	0.418127	0.798672
chrX:569352-569485:-	chrX:569450:-	chrX	569352	569485	-	-0.0214606	0.916038	0.99333	-0.339331	0.096586	0.353173	-0.130928	0.52041	0.879885	0.0535182	0.792966	0.947962	0.0588191	0.772503	0.948208
chrX:569638:-	chrX:569638:-	chrX	569638	569638	-	-0.630463	0.716762	NA	0.369605	0.828958	NA	-1.4777	0.433382	NA	-1.01135	0.591834	NA	-1.3331	0.458435	NA
chrX:569885:-	chrX:569885:-	chrX	569885	569885	-	-0.209561	0.871766	0.989578	0.726534	0.571383	0.827215	0.663239	0.59895	0.909548	0.325536	0.803576	NA	0.42485	0.734931	0.948208
chrX:570182-570212:-	chrX:570199:-	chrX	570182	570212	-	0.545325	0.588916	0.963484	1.5108	0.130101	0.415027	1.48708	0.129999	0.507824	-0.220675	0.843225	NA	1.06521	0.27858	0.677152
chrX:570366:-	chrX:570366:-	chrX	570366	570366	-	1.539	0.472574	NA	2.63884	0.211556	NA	-0.209671	0.932503	NA	2.39002	0.261576	NA	2.72636	0.186527	NA
chrX:570598-570721:-	chrX:570621:-	chrX	570598	570721	-	-0.0562731	0.737145	0.986317	0.124294	0.459638	0.759535	-0.0199096	0.905539	0.981179	0.259066	0.122982	0.505408	0.162279	0.332403	0.738651
chrX:570821-570833:-	chrX:570821:-	chrX	570821	570833	-	-0.98637	0.311897	0.830546	-0.320483	0.743202	0.909427	-1.29809	0.203214	0.627641	-0.350992	0.719823	NA	0.716118	0.423217	0.801271
chrX:571044:-	chrX:571044:-	chrX	571044	571044	-	-0.902627	0.325993	0.840544	-5.17218	0.00182974	0.0267915	-1.12798	0.22587	0.656798	0.411162	0.650037	0.900483	0.279718	0.754986	0.948208
chrX:571135:-	chrX:571135:-	chrX	571135	571135	-	0.00486443	0.998001	NA	1.78119	0.333966	NA	-0.346837	0.864028	NA	0.11972	0.952864	NA	1.26501	0.487614	NA
chrX:571172:-	chrX:571172:-	chrX	571172	571172	-	2.09948	0.329172	NA	2.96208	0.166856	NA	-0.208371	0.934047	NA	2.27573	0.298109	NA	1.75713	0.416171	NA
chrX:571270-571335:-	chrX:571312:-	chrX	571270	571335	-	0.910606	0.00199182	0.0327067	0.597683	0.0469453	0.235729	0.23143	0.439996	0.841697	-0.663909	0.0362797	0.286209	0.373707	0.207151	0.579219
chrX:571376:-	chrX:571376:-	chrX	571376	571376	-	1.38283	0.421574	0.906149	1.47758	0.402456	NA	1.34607	0.438074	NA	1.23712	0.488298	NA	1.88186	0.264903	0.659477
chrX:571695:-	chrX:571695:-	chrX	571695	571695	-	2.13469	0.330801	NA	2.21375	0.322207	NA	-0.290057	0.909815	NA	1.18227	0.614859	NA	1.99673	0.362432	NA
chrX:571982:-	chrX:571982:-	chrX	571982	571982	-	-2.5742	0.172645	NA	-0.736456	0.668956	NA	-1.70915	0.336304	NA	-2.00919	0.292668	NA	-1.00349	0.548027	NA
chrX:572122-572190:-	chrX:572159:-	chrX	572122	572190	-	-0.281728	0.146264	0.603763	-0.147418	0.448389	0.7512	-0.23431	0.227218	0.65822	0.350384	0.0708611	0.396516	0.0725115	0.707948	0.948208
chrX:572644:-	chrX:572644:-	chrX	572644	572644	-	0.0875629	0.945246	0.995613	0.550004	0.669785	0.876298	0.425823	0.736919	0.94733	0.287159	0.826092	NA	-1.48955	0.28724	0.687578
chrX:572947-572984:-	chrX:572959:-	chrX	572947	572984	-	-0.359643	0.166475	0.643563	-0.518274	0.0471449	0.236182	-0.513467	0.0485608	0.290215	0.479078	0.065182	0.384726	-1.28831	7.89e-07	1.86e-05
chrX:573169-573176:-	chrX:573169:-	chrX	573169	573176	-	-0.472756	0.681658	0.978931	-1.36759	0.281145	0.61212	-1.58497	0.200835	0.624479	-0.46781	0.693829	NA	-2.57005	0.0493102	0.231376
chrX:573727-573772:-	chrX:573745:-	chrX	573727	573772	-	-0.0301071	0.961981	0.997489	0.899372	0.148606	0.445664	0.862066	0.156045	0.555515	-0.270387	0.692298	0.913959	3.21062	2.1e-08	6.58e-07
chrX:575429-575436:-	chrX:575436:-	chrX	575429	575436	-	5.40125	0.00389077	0.0538023	4.88801	0.0103118	0.0883226	5.2882	0.00484918	0.0632279	1.62096	0.480038	NA	-0.639513	0.78477	0.948208
chrX:575473-575489:-	chrX:575487:-	chrX	575473	575489	-	4.01783	2.81e-14	7.67e-12	3.11428	8.77e-09	1.13e-06	3.77022	1.19e-12	2.97e-10	-0.821593	0.279946	0.692427	-0.527404	0.41087	0.794121
chrX:575524:-	chrX:575524:-	chrX	575524	575524	-	5.57697	0.0037385	0.0521147	4.97685	0.0109674	0.0922358	4.89891	0.0116652	0.114824	0.225581	0.924682	NA	1.8965	0.375856	0.772177
chrX:575659:-	chrX:575659:-	chrX	575659	575659	-	-0.0903067	0.961193	0.997489	1.5431	0.386855	NA	0.213998	0.907696	NA	0.48881	0.793464	NA	0.177412	0.922122	NA
chrX:575865:-	chrX:575865:-	chrX	575865	575865	-	0.0485519	0.980566	0.998767	2.12341	0.25771	NA	2.2153	0.231149	NA	-2.21746	0.336108	NA	1.04809	0.578473	0.898041
chrX:575984:-	chrX:575984:-	chrX	575984	575984	-	0.900755	0.621301	0.966091	1.51706	0.407207	NA	1.75704	0.324095	NA	1.51548	0.407321	NA	-0.53261	0.786886	NA
chrX:576363:-	chrX:576363:-	chrX	576363	576363	-	-0.661009	0.662344	0.974653	-0.0696691	0.963462	NA	-1.43136	0.369708	NA	-1.18361	0.465899	NA	-3.86225	0.052613	0.241948
chrX:576458:-	chrX:576458:-	chrX	576458	576458	-	0.566932	0.362016	0.867955	1.12808	0.0709445	0.299101	0.389317	0.536456	0.884701	0.259082	0.689022	0.913012	-0.317269	0.618981	0.920419
chrX:576551-576569:-	chrX:576551:-	chrX	576551	576569	-	-0.367904	0.718208	0.98496	0.252755	0.80502	0.936525	-0.260923	0.798971	0.966568	0.639855	0.524281	NA	-1.01515	0.332024	0.738396
chrX:576612-576698:-	chrX:576637:-	chrX	576612	576698	-	-0.195489	0.325707	0.840544	-0.398021	0.0479549	0.238539	-0.39425	0.0484248	0.289755	0.279236	0.161335	0.5652	-0.21365	0.282067	0.681807
chrX:576925:-	chrX:576925:-	chrX	576925	576925	-	-0.141399	0.917685	0.993582	0.310938	0.823308	0.943559	0.315222	0.81499	0.969843	1.64176	0.205815	NA	0.499668	0.702968	0.948208
chrX:577270-577291:-	chrX:577291:-	chrX	577270	577291	-	-0.379277	0.71507	0.98462	0.178589	0.864471	0.957861	-0.86161	0.425036	0.830598	-1.72524	0.160743	NA	0.140434	0.889613	0.971687
chrX:577361:-	chrX:577361:-	chrX	577361	577361	-	-2.00764	0.311147	NA	-2.18841	0.316484	NA	-1.13908	0.543944	NA	-1.25241	0.524324	NA	0.135084	0.938329	NA
chrX:577615:-	chrX:577615:-	chrX	577615	577615	-	-1.47465	0.548169	NA	1.31835	0.535901	NA	1.07241	0.611357	NA	0.741769	0.734132	NA	-0.639086	0.776687	NA
chrX:577693:-	chrX:577693:-	chrX	577693	577693	-	0.334956	0.862993	NA	-1.7851	0.443274	NA	-1.32543	0.533075	NA	-1.92255	0.40637	NA	-1.72097	0.418323	NA
chrX:577895:-	chrX:577895:-	chrX	577895	577895	-	1.18991	0.355206	0.862318	1.33179	0.310374	0.640354	1.30936	0.310173	0.745286	0.260628	0.851692	NA	0.530524	0.68502	0.947522
chrX:578190-578254:-	chrX:578215:-	chrX	578190	578254	-	0.233281	0.188867	0.682638	0.374138	0.0355427	0.201865	0.215258	0.225736	0.656798	0.562517	0.00155895	0.0427221	-0.32428	0.0681961	0.288672
chrX:580151:-	chrX:580151:-	chrX	580151	580151	-	1.66035	0.520347	NA	-1.14247	0.69087	NA	-1.64129	0.567794	NA	1.51393	0.568843	NA	3.19512	0.203888	NA
chrX:580666-580675:-	chrX:580675:-	chrX	580666	580675	-	3.41195	0.000564578	0.0121999	1.27546	0.236839	0.564668	1.9483	0.0565342	0.319649	2.43324	0.0172468	0.193352	1.00176	0.336883	0.741739
chrX:580880:-	chrX:580880:-	chrX	580880	580880	-	-1.2341	0.447568	NA	-0.444256	0.783543	NA	-4.73364	0.022239	NA	-1.16276	0.492275	NA	-1.68429	0.307654	NA
chrX:581605-581668:-	chrX:581654:-	chrX	581605	581668	-	-0.0663353	0.774765	0.987504	-0.323979	0.166234	0.473421	-0.185129	0.425672	0.830945	-0.0637132	0.784754	0.946279	-0.711992	0.00221521	0.0208613
chrX:581699:-	chrX:581699:-	chrX	581699	581699	-	0.08368	0.921459	0.993788	-1.61443	0.100622	0.36141	-0.492927	0.572168	0.898804	-0.579073	0.519743	0.841691	-1.60157	0.0778597	0.31643
chrX:582182-582197:-	chrX:582182:-	chrX	582182	582197	-	0.0130701	0.987538	0.999639	-0.252869	0.774704	0.923947	-0.608341	0.486654	0.863715	-0.29042	0.74258	NA	-0.748365	0.384605	0.777197
chrX:582274:-	chrX:582274:-	chrX	582274	582274	-	2.39344	0.142065	0.595205	1.56842	0.36108	0.682935	0.430395	0.80978	0.968408	2.2898	0.168931	NA	3.06517	0.0567476	0.254645
chrX:582297-582421:-	chrX:582350:-	chrX	582297	582421	-	-0.435598	0.011764	0.116569	-0.620658	0.00039701	0.00890164	-0.279264	0.106464	0.459376	0.0321459	0.852921	0.966169	-0.0987071	0.56624	0.891464
chrX:583524-583586:-	chrX:583556:-	chrX	583524	583586	-	-0.229839	0.244056	0.760563	-0.146409	0.46558	0.764356	-0.255137	0.198353	0.620871	-0.00364718	0.985428	0.995696	-0.0946219	0.629343	0.926175
chrX:584897:-	chrX:584897:-	chrX	584897	584897	-	2.80406	0.0612359	0.360991	3.21948	0.0326018	0.19118	2.00337	0.192198	0.612265	0.930207	0.578176	NA	0.0499627	0.97621	0.992932
chrX:585360:-	chrX:585360:-	chrX	585360	585360	-	-0.125929	0.929433	0.994629	1.19686	0.385726	NA	-0.542437	0.714818	0.942477	0.643936	0.649054	NA	0.257218	0.852396	0.961973
chrX:585405-585536:-	chrX:585481:-	chrX	585405	585536	-	-0.382791	0.0521601	0.325283	-0.411876	0.037604	0.208117	-0.181756	0.356517	0.782808	0.147993	0.453242	0.809638	-0.507459	0.010024	0.0698547
chrX:585814-585833:-	chrX:585823:-	chrX	585814	585833	-	-0.223765	0.801397	0.987504	-1.3326	0.216578	0.540729	0.420146	0.628082	0.919024	0.392699	0.660202	0.904478	1.88999	0.0212284	0.125843
chrX:586743:-	chrX:586743:-	chrX	586743	586743	-	-1.42736	0.33577	0.847419	0.700146	0.598837	NA	0.627145	0.631078	0.91986	-0.0758663	0.956611	NA	-0.436682	0.746022	0.948208
chrX:586989:-	chrX:586989:-	chrX	586989	586989	-	1.0561	0.550747	NA	0.246082	0.896425	NA	-0.282892	0.881258	NA	-1.33791	0.53664	NA	0.946222	0.592213	NA
chrX:587018:-	chrX:587018:-	chrX	587018	587018	-	0.23961	0.846243	0.98946	-0.747005	0.581124	0.832045	-0.670065	0.605889	0.912136	0.0353278	0.97802	NA	-0.678593	0.593617	0.907675
chrX:587053:-	chrX:587053:-	chrX	587053	587053	-	-1.0697	0.434656	0.911005	1.33493	0.287664	0.6196	0.0324194	0.980014	0.996385	0.0498804	0.970025	NA	-1.98519	0.176122	0.528014
chrX:587099:-	chrX:587099:-	chrX	587099	587099	-	-0.750038	0.685497	NA	1.06626	0.541506	NA	0.896947	0.603478	NA	-1.69182	0.430028	NA	-0.203149	0.908834	NA
chrX:587177:-	chrX:587177:-	chrX	587177	587177	-	1.05231	0.658382	NA	-0.779439	0.772782	NA	0.747818	0.756544	NA	0.235346	0.925512	NA	-3.08743	0.255658	NA
chrX:587374-587444:-	chrX:587423:-	chrX	587374	587444	-	-0.402069	0.031775	0.232919	-0.268131	0.154119	0.454792	-0.294817	0.115614	0.478932	0.241291	0.197725	0.608449	-0.365399	0.0506844	0.235491
chrX:590499:-	chrX:590499:-	chrX	590499	590499	-	3.62762	0.103096	NA	0.267042	0.918513	NA	2.96804	0.186859	NA	-1.18034	0.653339	NA	-2.04544	0.43639	NA
chrX:590522:-	chrX:590522:-	chrX	590522	590522	-	2.74963	0.19829	NA	0.266488	0.915587	NA	2.79479	0.1923	NA	1.78038	0.428922	NA	0.275225	0.906287	NA
chrX:590548-590569:-	chrX:590569:-	chrX	590548	590569	-	5.30385	0.00102154	0.0195357	2.30396	0.189096	0.505829	5.09721	0.00163907	0.0294822	2.23272	0.203926	NA	1.67867	0.331656	0.737998
chrX:590613:-	chrX:590613:-	chrX	590613	590613	-	3.97009	0.0992791	NA	0.257982	0.925522	NA	5.11017	0.0319193	NA	1.60173	0.55647	NA	-0.639509	0.816749	NA
chrX:594510:-	chrX:594510:-	chrX	594510	594510	-	-0.971663	0.609774	NA	-3.8213	0.0944931	NA	-1.87743	0.35857	NA	0.618848	0.737204	NA	-0.979587	0.604013	NA
chrX:594540-594566:-	chrX:594566:-	chrX	594540	594566	-	0.421697	0.508253	0.938296	-0.296968	0.666593	0.874623	0.282353	0.662022	0.929398	0.103812	0.876639	0.972592	0.264765	0.677543	0.943747
chrX:594590-594628:-	chrX:594619:-	chrX	594590	594628	-	0.252535	0.272806	0.793167	-0.234121	0.32458	0.651154	-0.436514	0.0634761	0.344059	-0.292773	0.218803	0.630828	-0.304204	0.189759	0.550128
chrX:598256:-	chrX:598256:-	chrX	598256	598256	-	1.40698	0.401248	0.895158	1.47076	0.389405	NA	0.210214	0.905461	NA	-1.37514	0.516075	NA	-0.641843	0.724905	NA
chrX:598288:-	chrX:598288:-	chrX	598288	598288	-	0.492453	0.776317	NA	0.145328	0.936182	NA	-0.659809	0.721477	NA	-0.778573	0.688563	NA	-1.01003	0.584119	NA
chrX:598312-598373:-	chrX:598363:-	chrX	598312	598373	-	0.396595	0.189281	0.683052	0.354418	0.243442	0.572926	-0.118844	0.69561	0.938477	-0.179549	0.557026	0.858875	-0.620366	0.0413545	0.204223
chrX:598394-598409:-	chrX:598406:-	chrX	598394	598409	-	0.882681	0.155165	0.619707	0.820953	0.198622	0.51774	0.340569	0.593465	0.907086	0.319532	0.625707	0.891367	-0.258954	0.687801	0.948208
chrX:603570:-	chrX:603570:-	chrX	603570	603570	-	-0.526699	0.841071	NA	2.79375	0.222812	NA	1.28766	0.586332	NA	0.107166	0.967184	NA	1.31425	0.572585	NA
chrX:604194-604225:-	chrX:604216:-	chrX	604194	604225	-	0.056614	0.880636	0.990562	0.147564	0.699608	0.889382	-0.149307	0.694647	0.938477	0.0947155	0.804635	0.951888	0.188138	0.615854	0.919396
chrX:604256-604293:-	chrX:604288:-	chrX	604256	604293	-	0.101708	0.666158	0.974974	0.0860591	0.71865	0.897983	-0.118525	0.617571	0.916076	-0.0176017	0.941394	0.985169	0.0938731	0.689785	0.948208
chrX:605424:-	chrX:605424:-	chrX	605424	605424	-	0.218032	0.918179	NA	-1.70192	0.491229	NA	-1.2445	0.585747	NA	0.0686872	0.974892	NA	-1.22233	0.582942	NA
chrX:605485:-	chrX:605485:-	chrX	605485	605485	-	0.0305318	0.976718	0.998107	0.0409244	0.969869	0.990399	-0.0841845	0.936767	0.986732	-0.791904	0.491959	NA	-1.59517	0.163822	0.506623
chrX:605635-605647:-	chrX:605639:-	chrX	605635	605647	-	-0.593303	0.362702	0.868296	0.203549	0.753598	0.914415	-0.149641	0.816101	0.969843	-0.703133	0.307893	0.713742	-0.332053	0.602291	0.912539
chrX:605808-605813:-	chrX:605813:-	chrX	605808	605813	-	-0.79764	0.27683	0.797388	-0.044166	0.951841	0.985625	0.0493459	0.944557	0.989237	-0.394419	0.597542	0.878602	-0.101387	0.885321	0.970736
chrX:605836-605852:-	chrX:605848:-	chrX	605836	605852	-	-0.294693	0.595362	0.964007	0.141884	0.800743	0.934634	-0.438145	0.437683	0.839797	-0.542478	0.35487	0.75161	-0.448206	0.418506	0.798672
chrX:605881:-	chrX:605881:-	chrX	605881	605881	-	-2.31826	0.237338	NA	-0.845766	0.646233	NA	-1.03315	0.567693	NA	-2.49159	0.242152	NA	-0.588173	0.735879	NA
chrX:606605-606616:-	chrX:606616:-	chrX	606605	606616	-	-0.0869896	0.899404	0.992329	0.0797883	0.910357	0.972709	-0.158935	0.819811	0.970862	-1.19338	0.131783	0.519688	0.360027	0.591824	0.906586
chrX:606644:-	chrX:606644:-	chrX	606644	606644	-	0.404712	0.773448	0.987504	1.42246	0.304372	0.635227	0.816384	0.557384	0.892255	-0.0854089	0.955523	NA	1.64495	0.21865	0.596722
chrX:607171-607206:-	chrX:607182:-	chrX	607171	607206	-	-0.630243	0.388447	0.886831	-0.203154	0.785401	0.927567	0.297644	0.671191	0.932278	-0.0366522	0.960238	0.989525	1.52821	0.0223885	0.131111
chrX:607269:-	chrX:607269:-	chrX	607269	607269	-	0.289854	0.841216	0.98946	0.243188	0.872536	NA	1.15906	0.410351	0.821155	-0.979988	0.567265	NA	1.41085	0.307885	0.712071
chrX:607375-607377:-	chrX:607377:-	chrX	607375	607377	-	-2.00231	0.033097	0.239396	-1.46229	0.126234	0.40835	-2.19377	0.0256317	0.193395	0.442463	0.596318	NA	-0.423653	0.611845	0.917792
chrX:607409-607457:-	chrX:607443:-	chrX	607409	607457	-	-1.34735	2.86e-05	0.00110108	-0.886547	0.00649218	0.0640214	-1.06304	0.000922314	0.0189561	0.230576	0.460678	0.812074	-0.645155	0.038962	0.196318
chrX:610848:-	chrX:610848:-	chrX	610848	610848	-	-0.95097	0.221214	0.731549	-0.855747	0.294247	0.626107	-0.19575	0.79489	0.965258	-0.10917	0.887178	0.974258	0.694191	0.33572	0.741106
chrX:610905:-	chrX:610905:-	chrX	610905	610905	-	1.66795	0.257526	0.776097	0.982464	0.52799	NA	0.721577	0.638614	0.922146	-1.35611	0.487905	NA	2.06109	0.156723	0.493328
chrX:611085:-	chrX:611085:-	chrX	611085	611085	-	0.513125	0.770475	NA	-2.81476	0.20017	NA	0.131643	0.941929	NA	1.30616	0.455946	NA	0.909258	0.598264	NA
chrX:612026:-	chrX:612026:-	chrX	612026	612026	-	1.53962	0.513925	NA	0.267228	0.91961	NA	-0.204458	0.938834	NA	1.0563	0.672102	NA	3.24989	0.152844	NA
chrX:612052-612131:-	chrX:612084:-	chrX	612052	612131	-	0.217506	0.472029	0.924682	-0.0517774	0.870682	0.960205	0.437732	0.147497	0.538973	-0.862659	0.0110505	0.148526	2.38748	1.34e-16	1.31e-14
chrX:612982:-	chrX:612982:-	chrX	612982	612982	-	1.53914	0.487659	NA	2.2394	0.31266	NA	1.79082	0.418495	NA	1.07023	0.650081	NA	2.40609	0.26392	NA
chrX:615182-615255:-	chrX:615187:-	chrX	615182	615255	-	-0.20452	0.554961	0.957092	-0.445576	0.216338	0.540426	-0.409085	0.24436	0.678729	0.0267896	0.939362	0.985019	-0.214557	0.533596	0.872342
chrX:615503:-	chrX:615503:-	chrX	615503	615503	-	-0.730286	0.750432	NA	-0.471593	0.841033	NA	0.248655	0.911234	NA	-3.05331	0.236088	NA	-0.938413	0.683011	NA
chrX:616609:-	chrX:616609:-	chrX	616609	616609	-	3.77397	0.0427244	0.284647	2.53474	0.192365	NA	3.43099	0.0673927	NA	-1.24429	0.593692	NA	0.880256	0.662633	0.938675
chrX:616888:-	chrX:616888:-	chrX	616888	616888	-	2.67692	0.278409	NA	0.241486	0.931117	NA	2.01662	0.421195	NA	0.0878758	0.974828	NA	-2.15046	0.445703	NA
chrX:616996:-	chrX:616996:-	chrX	616996	616996	-	-1.36698	0.564134	NA	-3.10852	0.22835	NA	1.00453	0.6469	NA	-3.14091	0.223539	NA	-2.4899	0.327077	NA
chrX:617088-617242:-	chrX:617198:-	chrX	617088	617242	-	-0.123546	0.66079	0.974246	-0.41697	0.156225	0.458225	-0.0202745	0.942773	0.988594	0.0237066	0.934248	0.98357	-0.54705	0.0539149	0.24616
chrX:617275-617295:-	chrX:617275:-	chrX	617275	617295	-	-0.602238	0.545895	0.953429	0.0500664	0.960083	0.987512	0.244595	0.800057	0.9669	0.270691	0.783817	NA	-0.705027	0.477324	0.839684
chrX:617320-617438:-	chrX:617379:-	chrX	617320	617438	-	-0.386622	0.0538563	0.331818	-0.407107	0.0457062	0.232315	-0.446988	0.0265394	0.197615	0.300518	0.13406	0.523945	-0.395475	0.0479506	0.226754
chrX:617473:-	chrX:617473:-	chrX	617473	617473	-	-0.509494	0.530478	0.948611	-0.231508	0.781648	0.926146	0.0464563	0.953534	0.990921	-0.318432	0.704306	0.919025	-0.399829	0.616952	0.919903
chrX:617601-617618:-	chrX:617601:-	chrX	617601	617618	-	-0.355506	0.763988	0.987276	-0.318851	0.797132	0.933596	0.147798	0.899079	0.979732	1.35253	0.232697	NA	-0.145277	0.900337	0.97459
chrX:617768:-	chrX:617768:-	chrX	617768	617768	-	-1.85004	0.491313	NA	0.267346	0.920267	NA	1.79458	0.450906	NA	1.27303	0.608749	NA	3.06591	0.183367	NA
chrX:619471:-	chrX:619471:-	chrX	619471	619471	-	0.450812	0.670092	0.976096	0.541829	0.618624	0.852447	0.154043	0.886774	0.979732	-0.969356	0.431281	NA	-0.23628	0.827101	0.953958
chrX:619498-619525:-	chrX:619511:-	chrX	619498	619525	-	0.651732	0.255274	0.773386	0.389698	0.510755	0.792075	0.461548	0.425661	0.830945	-1.16594	0.078361	0.414344	-0.866593	0.151167	0.48211
chrX:619645:-	chrX:619645:-	chrX	619645	619645	-	0.118007	0.955734	NA	-0.00835555	0.996972	NA	-0.974905	0.666991	NA	-0.502301	0.82461	NA	-1.37396	0.54438	NA
chrX:619666:-	chrX:619666:-	chrX	619666	619666	-	-0.530778	0.769487	NA	0.262506	0.884293	NA	-0.541319	0.767478	NA	-2.13129	0.325928	NA	-1.39553	0.458738	NA
chrX:619703-619719:-	chrX:619703:-	chrX	619703	619719	-	0.882295	0.353841	0.861755	0.254089	0.803592	0.936028	1.03433	0.277898	0.715204	-0.00406277	0.996885	NA	0.22335	0.817862	0.950876
chrX:619757-619774:-	chrX:619774:-	chrX	619757	619774	-	-0.130539	0.766359	0.987296	-0.229989	0.613447	0.849183	-0.168666	0.703544	0.939483	0.0985133	0.825731	0.957647	-0.204491	0.640329	0.930053
chrX:619806-619924:-	chrX:619833:-	chrX	619806	619924	-	-0.503542	0.0109825	0.11142	-0.770867	0.000137076	0.00395803	-0.526507	0.00806	0.0891886	-0.198512	0.319371	0.722481	-0.156882	0.424972	0.803064
chrX:619967:-	chrX:619967:-	chrX	619967	619967	-	0.106069	0.925272	0.994338	0.115083	0.922333	0.976087	1.06777	0.330268	0.762679	0.297014	0.798487	NA	-0.220444	0.846525	0.960234
chrX:620265:-	chrX:620265:-	chrX	620265	620265	-	-0.445642	0.924146	NA	0.25796	0.956048	NA	-0.240852	0.95896	NA	0.225568	0.961562	NA	4.09745	0.360039	NA
chrX:620354-620389:-	chrX:620383:-	chrX	620354	620389	-	-1.25936	0.0377639	0.261601	-0.921979	0.143094	0.436545	0.158193	0.776465	0.95931	-0.0338304	0.953453	0.987238	2.48492	2.04e-06	4.48e-05
chrX:620418:-	chrX:620418:-	chrX	620418	620418	-	-0.0988006	0.914725	0.993278	-0.848396	0.400608	0.714842	-1.00232	0.306945	0.743058	-0.972057	0.339655	NA	0.904678	0.310909	0.715293
chrX:620462-620471:-	chrX:620471:-	chrX	620462	620471	-	0.208237	0.779592	0.987504	-1.47548	0.0974152	0.35495	0.116449	0.877036	0.978528	-0.395569	0.619498	0.88913	0.180314	0.807512	0.948277
chrX:620571-620652:-	chrX:620633:-	chrX	620571	620652	-	-0.862893	0.00572404	0.0707333	-0.829122	0.0102019	0.0877729	-0.248015	0.420292	0.827967	0.725964	0.016887	0.190451	0.259598	0.38897	0.779873
chrX:622507:-	chrX:622507:-	chrX	622507	622507	-	1.86716	0.34967	0.857977	3.02104	0.124915	NA	3.31149	0.0872098	NA	1.58704	0.447659	NA	1.81358	0.361433	0.762039
chrX:622602-622605:-	chrX:622602:-	chrX	622602	622605	-	1.28021	0.291097	0.812478	1.96434	0.105465	0.371364	0.99711	0.418645	0.827166	0.0151572	0.991036	NA	0.14062	0.911086	0.977286
chrX:622637-622698:-	chrX:622637:-	chrX	622637	622698	-	0.0189146	0.969644	0.997489	0.892448	0.0711628	0.299581	0.571166	0.24589	0.680723	-0.437633	0.402637	0.782752	-0.33479	0.502882	0.855639
chrX:622719-622736:-	chrX:622729:-	chrX	622719	622736	-	-0.00468905	0.994661	0.999954	0.474934	0.501843	0.786437	0.277006	0.69175	0.937523	-0.347613	0.638162	0.896027	-0.697636	0.330249	0.736366
chrX:622759-622781:-	chrX:622769:-	chrX	622759	622781	-	-0.192796	0.636728	0.969326	0.242176	0.55651	0.817779	0.0860473	0.832673	0.972751	-0.272585	0.516797	0.841025	-0.177048	0.662698	0.938675
chrX:622806-622828:-	chrX:622806:-	chrX	622806	622828	-	-0.34486	0.562336	0.958615	0.927182	0.112565	0.385355	0.514004	0.377892	0.798785	-0.173017	0.776431	0.942997	-1.07312	0.0785675	0.318779
chrX:622861-623071:-	chrX:623049:-	chrX	622861	623071	-	-0.358804	0.0752018	0.409891	0.0298488	0.882401	0.963522	-0.260236	0.196969	0.619173	0.0181335	0.928395	0.981449	-0.461515	0.0220875	0.129792
chrX:623211-623228:-	chrX:623228:-	chrX	623211	623228	-	-0.628734	0.524307	0.945959	-0.92099	0.390598	0.707721	-0.519766	0.600844	0.910349	0.486845	0.61358	NA	0.217561	0.81705	0.950499
chrX:623264-623340:-	chrX:623334:-	chrX	623264	623340	-	0.175311	0.635537	0.969021	0.409936	0.276804	0.60842	0.442717	0.230293	0.662189	0.245232	0.518287	0.841653	0.319194	0.383245	0.775906
chrX:623727-623730:-	chrX:623730:-	chrX	623727	623730	-	0.211928	0.824659	0.988315	-0.312883	0.758704	0.916695	-0.77396	0.446061	0.844604	-0.252896	0.80279	NA	-0.0631631	0.947513	0.986704
chrX:624561:-	chrX:624561:-	chrX	624561	624561	-	-0.870171	0.541651	0.952359	-0.443139	0.760001	NA	-0.117234	0.932665	0.985484	-1.05261	0.488269	NA	-0.602431	0.665443	0.939736
chrX:624592-624601:-	chrX:624597:-	chrX	624592	624601	-	-0.397402	0.560167	0.957951	-0.840708	0.245967	0.575523	-0.950862	0.178356	0.592108	-3.19526	0.00106276	0.0329024	-2.02364	0.00631136	0.0486112
chrX:625388-625401:-	chrX:625388:-	chrX	625388	625401	-	1.58282	0.215571	0.72359	1.26119	0.342571	0.666789	1.66455	0.19429	0.615257	1.41232	0.283869	NA	0.254538	0.848972	0.961264
chrX:628425:-	chrX:628425:-	chrX	628425	628425	-	1.93486	0.308947	NA	-2.18568	0.351231	NA	1.56816	0.415734	NA	0.227506	0.91418	NA	-0.00371332	0.998535	NA
chrX:628606-628607:-	chrX:628607:-	chrX	628606	628607	-	-0.0592111	0.883465	0.99067	0.616701	0.127234	0.410195	0.372055	0.353359	0.78097	-0.154579	0.711863	0.919771	-0.381175	0.347754	0.752188
chrX:628648-628750:-	chrX:628718:-	chrX	628648	628750	-	-0.684393	0.00300884	0.0443274	-0.739511	0.00147955	0.0230993	-0.544744	0.0182623	0.155235	0.0491473	0.831243	0.959123	-0.175694	0.444122	0.815387
chrX:629313:-	chrX:629313:-	chrX	629313	629313	-	1.06414	0.635506	NA	1.76577	0.43162	NA	0.713672	0.758143	NA	2.32001	0.290113	NA	2.49024	0.243727	NA
chrX:630391-630394:-	chrX:630391:-	chrX	630391	630394	-	5.28448	0.00866599	0.0948568	3.75433	0.0750579	NA	4.52503	0.026402	NA	1.6144	0.503293	NA	0.840751	0.727993	0.948208
chrX:630418-630460:-	chrX:630458:-	chrX	630418	630460	-	4.65043	2.07e-21	1.17e-18	3.69646	1.19e-13	3.58e-11	4.05587	1.79e-16	7.01e-14	1.09049	0.0506635	0.339327	0.574445	0.29052	0.691844
chrX:631007-631019:-	chrX:631017:-	chrX	631007	631019	-	7.02714	2.04e-05	0.0008343	5.67608	0.000726465	0.0138345	6.24607	0.000166245	0.00497373	0.225582	0.917734	0.979426	1.84483	0.337059	0.741739
chrX:631042-631054:-	chrX:631045:-	chrX	631042	631054	-	7.64809	1.4e-06	9.15e-05	6.69003	2.87e-05	0.00115418	6.78629	2.03e-05	0.000943733	2.58171	0.172083	0.57727	2.32781	0.193883	0.557622
chrX:632947-633063:-	chrX:633004:-	chrX	632947	633063	-	0.471805	0.0423544	0.282757	1.36311	4.3e-09	5.75e-07	-0.0677842	0.772003	0.957858	0.852721	0.000252246	0.0123848	0.0923446	0.691541	0.948208
chrX:633092-633101:-	chrX:633101:-	chrX	633092	633101	-	0.823995	0.559663	0.957782	1.01023	0.487992	0.778464	-0.207829	0.893148	0.979732	1.7765	0.202761	NA	2.60281	0.0508292	0.235983
chrX:633134-633209:-	chrX:633134:-	chrX	633134	633209	-	-0.245702	0.635456	0.969021	-0.343093	0.530963	0.802987	-0.0226703	0.965072	0.993236	0.374868	0.471052	0.817554	1.37639	0.00482564	0.0393141
chrX:636056:-	chrX:636056:-	chrX	636056	636056	-	-0.368308	0.858668	0.98946	1.69807	0.375816	NA	1.75706	0.351196	NA	1.71882	0.369397	NA	0.722574	0.707129	0.948208
chrX:636668:-	chrX:636668:-	chrX	636668	636668	-	-1.12083	0.606758	NA	0.738303	0.722749	NA	-1.39548	0.53399	NA	-3.37174	0.171327	NA	-1.78965	0.425104	NA
chrX:636699-636732:-	chrX:636732:-	chrX	636699	636732	-	1.06752	0.0422885	0.282432	1.76718	0.000776392	0.0143713	0.497809	0.359457	0.785496	1.07176	0.0474309	0.326196	0.722996	0.171354	0.519832
chrX:636790-636848:-	chrX:636802:-	chrX	636790	636848	-	0.0659504	0.779844	0.987504	0.320574	0.17989	0.492265	0.19864	0.400644	0.81497	0.337945	0.157043	0.55999	0.947008	4.28e-05	0.000689425
chrX:637605:-	chrX:637605:-	chrX	637605	637605	-	-0.0817684	0.942132	0.995529	0.81379	0.462419	0.761835	-0.895578	0.481706	0.862785	-2.04788	0.219356	0.630828	4.58409	2.23e-06	4.85e-05
chrX:637633-637637:-	chrX:637633:-	chrX	637633	637637	-	3.33768	0.0808777	0.429273	3.65883	0.0598625	0.272569	4.37118	0.0190494	0.158787	1.62318	0.472667	NA	6.20036	0.000635384	0.00729057
chrX:638495-638504:-	chrX:638504:-	chrX	638495	638504	-	-0.570924	0.66553	0.974953	-0.160724	0.904854	0.970523	-0.443154	0.738291	0.947549	-0.108863	0.935161	NA	0.54339	0.665142	0.939689
chrX:638973-639052:-	chrX:639027:-	chrX	638973	639052	-	-0.210305	0.387487	0.886358	-0.383013	0.119878	0.398033	-0.339292	0.164788	0.571081	-0.192967	0.431792	0.798844	-0.334611	0.168884	0.515502
chrX:639195:-	chrX:639195:-	chrX	639195	639195	-	0.772705	0.490022	0.930916	0.782983	0.497952	0.784008	-0.190075	0.873165	0.978035	0.252927	0.832133	NA	0.485023	0.665979	0.939874
chrX:639237-639276:-	chrX:639249:-	chrX	639237	639276	-	-0.60512	0.316193	0.834537	-0.142771	0.815145	0.940223	-1.25006	0.0484961	0.289921	0.149216	0.804251	0.951629	-0.705066	0.241072	0.628644
chrX:639299:-	chrX:639299:-	chrX	639299	639299	-	0.836806	0.57219	0.96064	-0.380484	0.812198	NA	-0.604338	0.700967	NA	-0.274849	0.862602	NA	-1.25566	0.432367	0.807336
chrX:639340-639346:-	chrX:639340:-	chrX	639340	639346	-	-0.0274859	0.974863	0.997983	-0.631861	0.499178	0.784761	-0.675915	0.456121	0.851118	0.214923	0.808776	0.953316	-0.349321	0.690247	0.948208
chrX:639395:-	chrX:639395:-	chrX	639395	639395	-	-2.62338	0.241862	NA	0.455311	0.806108	NA	-0.0686254	0.970514	NA	-1.12138	0.585291	NA	0.281107	0.876668	NA
chrX:639621:-	chrX:639621:-	chrX	639621	639621	-	0.194693	0.906472	0.993278	1.5769	0.326567	NA	0.457808	0.781647	NA	0.719291	0.66704	NA	-0.259911	0.877268	0.968311
chrX:639925-639959:-	chrX:639949:-	chrX	639925	639959	-	0.584945	0.449903	0.917219	1.76551	0.0207595	0.14079	-1.20363	0.170885	0.580957	1.07015	0.17	0.574407	-1.49358	0.0857853	0.338063
chrX:639985:-	chrX:639985:-	chrX	639985	639985	-	0.489091	0.851909	NA	2.43741	0.330093	NA	1.68549	0.503437	NA	1.48976	0.563761	NA	-0.751128	0.787681	NA
chrX:640378-640439:-	chrX:640431:-	chrX	640378	640439	-	-0.446493	0.202668	0.704348	-0.553355	0.13881	0.429388	-0.158434	0.649496	0.926376	0.128732	0.715245	0.920839	3.76702	2.69e-32	1.26e-29
chrX:640573:-	chrX:640573:-	chrX	640573	640573	-	1.04022	0.703166	NA	1.67092	0.541631	NA	2.79223	0.261994	NA	1.6019	0.555641	NA	5.27821	0.025718	NA
chrX:640894:-	chrX:640894:-	chrX	640894	640894	-	-1.45037	0.433493	NA	-3.18904	0.131453	NA	0.337953	0.838102	NA	0.233695	0.891013	NA	1.09155	0.493922	NA
chrX:641168:-	chrX:641168:-	chrX	641168	641168	-	-1.66843	0.340268	0.850515	-4.02391	0.0568052	NA	-2.07623	0.261514	NA	0.4854	0.764651	NA	-0.606876	0.710215	NA
chrX:641216:-	chrX:641216:-	chrX	641216	641216	-	-1.18645	0.613001	NA	0.0645495	0.977362	NA	0.0190497	0.99319	NA	0.33749	0.880579	NA	-3.82531	0.134793	NA
chrX:641430:-	chrX:641430:-	chrX	641430	641430	-	-2.76886	0.228088	NA	-1.13123	0.589404	NA	0.0527936	0.977891	NA	-0.0151486	0.993792	NA	0.523572	0.778792	NA
chrX:641668:-	chrX:641668:-	chrX	641668	641668	-	-0.507151	0.689811	0.980667	0.430495	0.731091	0.903527	-1.07494	0.426909	0.831746	0.229052	0.856445	NA	1.55771	0.183769	0.539928
chrX:641714-641774:-	chrX:641744:-	chrX	641714	641774	-	-0.00499061	0.991693	0.999843	-0.262169	0.604164	0.84504	-0.114906	0.813176	0.969199	0.649586	0.176003	0.580895	2.58974	1.19e-08	3.89e-07
chrX:641795-641803:-	chrX:641803:-	chrX	641795	641803	-	1.13391	0.301099	0.821623	1.55165	0.16263	0.468068	1.61583	0.136251	0.519229	1.48486	0.182453	0.591054	3.54673	0.000636763	0.00730376
chrX:641837-641852:-	chrX:641846:-	chrX	641837	641852	-	-0.349307	0.783361	0.987504	-0.492421	0.716018	0.897064	0.100082	0.936357	0.986642	0.802624	0.517614	NA	1.49469	0.207677	0.579478
chrX:643623-643640:-	chrX:643623:-	chrX	643623	643640	-	0.751812	0.332045	0.845165	0.211531	0.794974	0.932779	0.753542	0.333603	0.765647	-2.22535	0.0350696	0.28174	-0.952341	0.249715	0.638955
chrX:643696-643699:-	chrX:643696:-	chrX	643696	643699	-	1.35152	0.238089	0.75329	1.90025	0.0989712	0.358035	1.66755	0.144016	0.533527	-0.04233	0.974157	NA	0.455496	0.699351	0.948208
chrX:643725:-	chrX:643725:-	chrX	643725	643725	-	0.439913	0.841318	NA	0.953368	0.666934	NA	1.56234	0.464497	NA	-0.842812	0.733894	NA	-0.639014	0.781448	NA
chrX:643970-643979:-	chrX:643970:-	chrX	643970	643979	-	-0.535285	0.587079	0.963484	-1.78301	0.127052	0.409841	0.00342194	0.997188	0.999745	-1.49596	0.182479	NA	0.27656	0.770976	0.948208
chrX:644114-644188:-	chrX:644178:-	chrX	644114	644188	-	-0.163155	0.368733	0.872837	-0.482677	0.00855526	0.0777249	-0.130757	0.471898	0.858201	-0.425742	0.0202717	0.212039	-0.379722	0.0364889	0.187181
chrX:644214-644222:-	chrX:644214:-	chrX	644214	644222	-	0.861504	0.478645	0.926149	-0.157667	0.905341	0.970523	0.427872	0.730739	0.945835	0.0273382	0.98329	NA	-1.81667	0.202868	0.572322
chrX:646499-646568:-	chrX:646523:-	chrX	646499	646568	-	0.0115383	0.974459	0.997983	0.153924	0.674592	0.878164	-0.150523	0.679328	0.934006	0.0398251	0.913821	0.979426	0.337097	0.34425	0.74929
chrX:646589-646597:-	chrX:646589:-	chrX	646589	646597	-	0.525653	0.737482	0.986317	2.54553	0.0819167	0.323118	1.76542	0.23253	0.664796	0.214242	0.901018	NA	3.76428	0.00741456	0.0549322
chrX:647034:-	chrX:647034:-	chrX	647034	647034	-	2.00133	0.53427	NA	0.257972	0.939124	NA	-0.240843	0.943159	NA	1.58755	0.635601	NA	4.21933	0.171601	NA
chrX:649427:-	chrX:649427:-	chrX	649427	649427	-	1.84873	0.338491	0.849277	1.94808	0.3273	0.653392	3.11088	0.0966157	0.43622	2.15613	0.272179	NA	4.55991	0.0128103	0.0846244
chrX:649846-649856:-	chrX:649846:-	chrX	649846	649856	-	-2.08626	0.0379889	0.262548	-4.49509	0.00653806	0.0642987	-1.83046	0.0675047	0.356473	-0.218538	0.815539	NA	-0.417476	0.648319	0.932937
chrX:649901-649910:-	chrX:649901:-	chrX	649901	649910	-	-1.74884	0.168518	0.647942	-5.04389	0.00578224	0.0588843	-0.774762	0.522295	0.880578	-0.741102	0.550603	NA	-0.196358	0.866533	0.965877
chrX:651223-651228:-	chrX:651228:-	chrX	651223	651228	-	-3.38762	0.0785752	0.421422	-1.25685	0.508042	0.790246	0.582571	0.683629	0.934663	-0.291162	0.85853	NA	4.35929	0.000691857	0.00784994
chrX:651251-651300:-	chrX:651263:-	chrX	651251	651300	-	0.485301	0.292949	0.814028	0.118721	0.814152	0.940223	0.908512	0.0461109	0.281856	-0.253041	0.629775	0.893341	4.41377	8.67e-26	2.16e-23
chrX:651728:-	chrX:651728:-	chrX	651728	651728	-	-1.40888	0.567171	NA	-2.18762	0.379421	NA	-2.68643	0.280417	NA	1.83512	0.384871	NA	1.99248	0.335625	NA
chrX:651964-651965:-	chrX:651965:-	chrX	651964	651965	-	0.407109	0.780825	0.987504	2.53022	0.0702088	0.297121	1.5182	0.283074	0.719393	-3.15992	0.110568	NA	-0.580401	0.705616	0.948208
chrX:652119:-	chrX:652119:-	chrX	652119	652119	-	-1.18492	0.474598	0.924907	-0.381268	0.816861	NA	0.387957	0.802917	NA	-1.29943	0.46299	NA	-1.4007	0.398773	0.78664
chrX:652505:-	chrX:652505:-	chrX	652505	652505	-	-0.433861	0.874684	NA	2.36431	0.337266	NA	2.38208	0.327545	NA	-1.17703	0.670501	NA	1.32154	0.593362	NA
chrX:654135:-	chrX:654135:-	chrX	654135	654135	-	-0.777041	0.642887	NA	-2.3582	0.258632	NA	-2.83179	0.179377	NA	-0.0775686	0.963055	NA	-0.154867	0.923803	NA
chrX:654182-654193:-	chrX:654193:-	chrX	654182	654193	-	0.138001	0.873517	0.989808	-0.929565	0.342723	0.666789	-0.0738181	0.933397	0.98554	-0.0258641	0.977218	0.993571	0.377187	0.658721	0.937623
chrX:654230-654289:-	chrX:654280:-	chrX	654230	654289	-	0.142318	0.510378	0.939017	0.0393866	0.858284	0.955192	0.0720211	0.740446	0.947853	-0.0251848	0.909256	0.979426	0.587919	0.00603449	0.0469207
chrX:654323:-	chrX:654323:-	chrX	654323	654323	-	0.593018	0.714895	NA	1.15059	0.480831	NA	-1.17728	0.52382	NA	-1.7643	0.391634	NA	-0.341355	0.838755	NA
chrX:654362-654366:-	chrX:654362:-	chrX	654362	654366	-	0.758204	0.499638	0.935668	0.719681	0.534001	0.804833	0.488583	0.668996	0.93188	-2.7856	0.108119	NA	-1.02308	0.402388	0.789093
chrX:654491:-	chrX:654491:-	chrX	654491	654491	-	1.72968	0.550269	NA	2.17042	0.456072	NA	0.81162	0.786083	NA	1.29339	0.665448	NA	-2.03538	0.51955	NA
chrX:655730:-	chrX:655730:-	chrX	655730	655730	-	-0.675821	0.715161	NA	0.326941	0.857862	NA	-0.890822	0.638884	NA	-2.06729	0.34469	NA	-1.429	0.456104	NA
chrX:655980-656042:-	chrX:656023:-	chrX	655980	656042	-	-0.00145994	0.994977	0.999954	0.0254187	0.912962	0.973318	-0.0959451	0.679386	0.934006	0.4981	0.0318432	0.268052	-0.454944	0.0500035	0.233313
chrX:656460-656470:-	chrX:656460:-	chrX	656460	656470	-	4.43473	0.00910727	0.0981398	3.95665	0.0219625	0.146447	4.47989	0.00851674	0.092488	1.33585	0.492414	NA	-0.602882	0.781634	0.948208
chrX:656570:-	chrX:656570:-	chrX	656570	656570	-	0.391742	0.777086	0.987504	-0.0845756	0.954669	NA	0.0413329	0.976828	NA	0.446367	0.754823	NA	0.655828	0.629756	0.92629
chrX:657620:-	chrX:657620:-	chrX	657620	657620	-	-0.181019	0.895586	0.991867	-0.533152	0.717537	NA	-0.712127	0.620483	NA	0.0768452	0.956538	NA	-0.841208	0.551827	0.883935
chrX:658639-658698:-	chrX:658676:-	chrX	658639	658698	-	0.317147	0.265758	0.784251	0.120861	0.672327	0.877256	-0.00775232	0.978327	0.995968	0.614167	0.0313241	0.265646	-0.314156	0.270838	0.666581
chrX:659817-659822:-	chrX:659817:-	chrX	659817	659822	-	6.05064	0.000894266	0.0176053	4.52609	0.0162827	0.119513	4.90092	0.00800113	0.0887583	2.65608	0.200002	NA	-0.639514	0.781899	0.948208
chrX:662744-662748:-	chrX:662748:-	chrX	662744	662748	-	0.596645	0.500306	0.9359	0.738921	0.414311	0.724881	0.255293	0.777723	0.959791	-0.647264	0.515584	NA	-0.443723	0.629057	0.925988
chrX:662777-662848:-	chrX:662836:-	chrX	662777	662848	-	0.702821	0.0159996	0.143401	0.962522	0.00103406	0.0177519	0.39221	0.181634	0.59805	-0.331272	0.272401	0.686605	0.192156	0.511759	0.860334
chrX:662903:-	chrX:662903:-	chrX	662903	662903	-	-1.4565	0.46596	NA	1.08328	0.54484	NA	0.408184	0.820591	NA	-3.14913	0.157907	NA	0.0229183	0.989839	NA
chrX:663481:-	chrX:663481:-	chrX	663481	663481	-	0.373523	0.868475	NA	-0.643913	0.799562	NA	0.892385	0.688655	NA	2.0616	0.345044	NA	1.16713	0.593057	NA
chrX:664886:-	chrX:664886:-	chrX	664886	664886	-	-0.741128	0.671975	NA	-0.357258	0.841516	NA	0.631657	0.704512	NA	-0.89212	0.631672	NA	-1.39458	0.439813	NA
chrX:665019-665093:-	chrX:665065:-	chrX	665019	665093	-	-0.403439	0.0764135	0.413549	-0.142484	0.53546	0.805501	-0.117535	0.605129	0.911961	0.371536	0.102246	0.468697	-0.254539	0.260872	0.654482
chrX:665185:-	chrX:665185:-	chrX	665185	665185	-	1.98224	0.308832	NA	1.65441	0.407898	NA	-1.24359	0.601706	NA	0.228559	0.915505	NA	-3.08374	0.19575	NA
chrX:665705:-	chrX:665705:-	chrX	665705	665705	-	6.00323	0.000984264	0.0189779	4.88718	0.00883319	0.0791122	4.00993	0.0333553	0.228847	2.65607	0.19998	NA	0.825748	0.716249	0.948208
chrX:665736-665744:-	chrX:665744:-	chrX	665736	665744	-	5.65823	0.000448654	0.0102707	4.3712	0.00770027	0.0721705	4.42277	0.00660528	0.0780137	1.70307	0.349652	0.748	2.50781	0.13441	0.449648
chrX:665950-665953:-	chrX:665950:-	chrX	665950	665953	-	3.52496	0.0132222	0.126208	2.89145	0.0473578	0.236835	2.85372	0.0478159	0.287857	-0.747443	0.700469	NA	0.418259	0.78967	0.948208
chrX:666519:-	chrX:666519:-	chrX	666519	666519	-	4.06227	0.0466276	0.301574	2.49928	0.240071	NA	2.1146	0.318332	NA	0.201546	0.934142	NA	0.279333	0.902506	0.975103
chrX:666879:-	chrX:666879:-	chrX	666879	666879	-	0.684962	0.697475	NA	0.683778	0.706545	NA	-0.87147	0.65642	NA	1.01791	0.568758	NA	-0.417839	0.82009	NA
chrX:667091-667101:-	chrX:667101:-	chrX	667091	667101	-	-0.0970714	0.926214	0.994512	-0.0287897	0.978753	0.992924	-0.127293	0.90429	0.981021	-0.313276	0.775572	NA	-0.430649	0.68299	0.946109
chrX:667147-667225:-	chrX:667165:-	chrX	667147	667225	-	-0.62868	0.0535308	0.330686	-0.257827	0.433005	0.739115	-0.917144	0.00553148	0.0695531	0.570354	0.0765071	0.408126	0.109448	0.732117	0.948208
chrX:667427-667434:-	chrX:667434:-	chrX	667427	667434	-	-0.0835342	0.936863	0.994803	-0.350874	0.759501	0.916974	0.517392	0.615505	0.915598	-0.309002	0.785736	NA	2.61318	0.00673326	0.0511321
chrX:667455-667487:-	chrX:667471:-	chrX	667455	667487	-	0.326533	0.773691	0.987504	0.501761	0.673478	0.877628	1.69652	0.110204	0.46866	0.895273	0.434106	0.799866	4.43161	1.07e-05	0.000201023
chrX:668668:-	chrX:668668:-	chrX	668668	668668	-	1.89296	0.396951	NA	1.38325	0.557085	NA	2.38155	0.282835	NA	-1.18169	0.646837	NA	3.03164	0.163777	NA
chrX:669225:-	chrX:669225:-	chrX	669225	669225	-	0.856031	0.669733	NA	-2.82371	0.242518	NA	-0.879834	0.687888	NA	-1.47762	0.533716	NA	0.584785	0.77122	NA
chrX:672265-672271:-	chrX:672271:-	chrX	672265	672271	-	3.95794	0.00799146	0.0897476	1.71181	0.28613	0.61786	2.15766	0.16217	0.566649	0.829556	0.625776	NA	-0.644814	0.721464	0.948208
chrX:672335:-	chrX:672335:-	chrX	672335	672335	-	4.42487	0.104267	NA	0.257977	0.932607	NA	3.5251	0.202213	NA	1.59376	0.597576	NA	-0.639514	0.833952	NA
chrX:672356:-	chrX:672356:-	chrX	672356	672356	-	3.25168	0.171494	NA	2.70246	0.28001	NA	4.20186	0.0725955	NA	3.35154	0.166689	NA	-0.639516	0.812875	NA
chrX:672705-672710:-	chrX:672705:-	chrX	672705	672710	-	-0.435113	0.799644	0.987504	-1.26826	0.53527	NA	1.01702	0.522571	NA	-1.37306	0.497755	NA	2.57424	0.0903164	0.350568
chrX:672737-672753:-	chrX:672737:-	chrX	672737	672753	-	1.76165	0.357679	0.864546	1.84425	0.350743	0.673762	3.19691	0.0835693	0.402889	2.20621	0.254265	NA	4.4138	0.0149095	0.0953892
chrX:673881:-	chrX:673881:-	chrX	673881	673881	-	2.24161	0.370334	NA	1.08442	0.683448	NA	2.27267	0.365201	NA	-1.2864	0.649923	NA	-0.634896	0.820496	NA
chrX:674146-674163:-	chrX:674149:-	chrX	674146	674163	-	7.53952	1.94e-07	1.63e-05	6.63199	5.11e-06	0.000289702	6.98016	1.49e-06	0.000107143	3.49987	0.0211072	0.217325	2.51356	0.0991845	0.371732
chrX:674240:-	chrX:674240:-	chrX	674240	674240	-	0.547397	0.602325	0.964942	1.16194	0.27037	0.601433	0.630033	0.550534	0.890401	-0.234796	0.837562	NA	0.199712	0.850156	0.96142
chrX:674612-674640:-	chrX:674612:-	chrX	674612	674640	-	6.97644	2.26e-06	0.000133827	6.10087	3.92e-05	0.0014617	6.60505	7.8e-06	0.000434177	3.4716	0.0245406	0.233937	1.6367	0.309604	0.714242
chrX:675213:-	chrX:675213:-	chrX	675213	675213	-	3.10477	0.170017	NA	4.00285	0.0751336	NA	3.20455	0.158129	NA	3.68664	0.104467	NA	3.45634	0.121012	NA
chrX:675720-675739:-	chrX:675728:-	chrX	675720	675739	-	-0.112337	0.876456	0.990025	-1.66755	0.0471828	0.236259	-1.23908	0.108412	0.464026	-0.55783	0.463814	0.813414	-0.608825	0.404643	0.790906
chrX:675778:-	chrX:675778:-	chrX	675778	675778	-	-0.794762	0.563606	0.95907	-1.71279	0.287709	NA	0.374456	0.775774	NA	-1.75339	0.276434	NA	-0.600764	0.655643	0.935959
chrX:675852-675923:-	chrX:675893:-	chrX	675852	675923	-	0.106273	0.630372	0.968469	0.152208	0.493864	0.781724	-0.205311	0.355139	0.782099	0.181217	0.415114	0.790518	-0.202814	0.35899	0.760151
chrX:675944-675955:-	chrX:675944:-	chrX	675944	675955	-	-0.581023	0.471761	0.924682	-0.0858653	0.916383	0.973576	-0.383832	0.634608	0.92077	-0.210805	0.797935	0.948921	-0.578618	0.468924	0.834085
chrX:676772-676849:-	chrX:676839:-	chrX	676772	676849	-	-0.563183	0.0435613	0.28844	-0.851612	0.00308478	0.0385374	-0.386167	0.166596	0.573248	0.00466609	0.986698	0.996223	0.244204	0.373718	0.771468
chrX:677553-677561:-	chrX:677561:-	chrX	677553	677561	-	1.92185	0.0311474	0.229294	1.8337	0.0444983	0.228382	1.69091	0.0607665	0.33593	0.292725	0.769321	0.940641	-0.209386	0.829062	0.954437
chrX:678361-678362:-	chrX:678362:-	chrX	678361	678362	-	0.462546	0.563807	0.95907	-0.392576	0.652553	0.868308	0.0278536	0.972972	0.995204	-0.967531	0.291534	0.700751	0.370122	0.64317	0.931338
chrX:678712-678728:-	chrX:678716:-	chrX	678712	678728	-	-0.294703	0.290376	0.811571	-0.612982	0.0351142	0.200524	-0.188441	0.500245	0.871964	-0.49635	0.085711	0.431452	0.304078	0.266411	0.661196
chrX:678752-678775:-	chrX:678768:-	chrX	678752	678775	-	0.311211	0.659237	0.974101	-0.536006	0.487451	0.778291	0.742701	0.28896	0.725183	-1.38451	0.0997321	0.463489	-1.08324	0.149216	0.478724
chrX:681204:-	chrX:681204:-	chrX	681204	681204	-	2.75215	0.219714	NA	2.64598	0.246108	NA	1.79855	0.435284	NA	0.199724	0.93838	NA	-2.0456	0.435343	NA
chrX:681232-681246:-	chrX:681238:-	chrX	681232	681246	-	5.87304	0.000118635	0.00353307	5.37889	0.000465603	0.00994663	5.45636	0.000363552	0.00928278	0.192467	0.924756	0.980346	-0.65771	0.749241	0.948208
chrX:681287-681301:-	chrX:681287:-	chrX	681287	681301	-	5.41552	0.000496681	0.011061	4.7465	0.00255634	0.0339836	5.20154	0.00084799	0.0177711	2.81616	0.0882301	0.437263	1.36877	0.421706	0.800568
chrX:683221:-	chrX:683221:-	chrX	683221	683221	-	0.685691	0.757997	NA	0.859452	0.705799	NA	-0.113526	0.961296	NA	1.50712	0.496308	NA	-1.44938	0.564121	NA
chrX:683298-683363:-	chrX:683328:-	chrX	683298	683363	-	-0.0551242	0.905629	0.993278	0.465745	0.318417	0.646431	-0.310794	0.508427	0.874386	0.15862	0.735924	0.927439	-1.1944	0.0123671	0.0823102
chrX:683433-683507:-	chrX:683455:-	chrX	683433	683507	-	0.337095	0.365936	0.871478	-0.0347863	0.928301	0.97784	0.0748089	0.842949	0.974226	-0.373084	0.342323	0.741808	1.32926	0.000278387	0.00357652
chrX:683535:-	chrX:683535:-	chrX	683535	683535	-	0.720471	0.718189	NA	0.855136	0.677495	NA	0.454162	0.824168	NA	0.339954	0.873018	NA	2.26851	0.234095	NA
chrX:685282:-	chrX:685282:-	chrX	685282	685282	-	4.15821	0.0820444	NA	3.64341	0.137802	NA	3.52501	0.146727	NA	0.225582	0.934637	NA	0.867664	0.749211	NA
chrX:687319-687334:-	chrX:687319:-	chrX	687319	687334	-	7.7054	1.4e-06	9.15e-05	6.36258	8.29e-05	0.00266146	6.9321	1.53e-05	0.000743152	2.70393	0.149927	0.550661	-0.63952	0.765867	0.948208
chrX:687362:-	chrX:687362:-	chrX	687362	687362	-	3.71048	0.213687	NA	3.33485	0.273077	NA	3.20839	0.287603	NA	0.225572	0.944935	NA	-0.639525	0.844754	NA
chrX:688961-688979:-	chrX:688979:-	chrX	688961	688979	-	5.63092	0.00309136	0.0452906	4.64532	0.0173109	NA	4.00689	0.0407782	NA	2.66055	0.213748	NA	0.832167	0.721281	0.948208
chrX:689547-689551:-	chrX:689547:-	chrX	689547	689551	-	0.216257	0.865078	0.98946	0.303246	0.815989	0.940223	0.397436	0.754979	0.951213	-1.52729	0.308706	NA	-0.182949	0.886503	0.971261
chrX:689611-689618:-	chrX:689611:-	chrX	689611	689618	-	0.148953	0.907136	0.993278	0.877693	0.491396	0.780291	0.588676	0.641574	0.923453	-0.89348	0.536986	NA	-0.304404	0.813857	0.949489
chrX:689719-689729:-	chrX:689719:-	chrX	689719	689729	-	-0.18748	0.903539	0.993278	0.200517	0.898204	NA	-0.402008	0.798503	NA	-1.68954	0.352236	NA	-0.203646	0.894627	0.972316
chrX:689758:-	chrX:689758:-	chrX	689758	689758	-	1.31455	0.488222	NA	0.340871	0.868997	NA	-0.237438	0.909118	NA	0.746235	0.709704	NA	1.85817	0.31883	NA
chrX:689987:-	chrX:689987:-	chrX	689987	689987	-	0.614304	0.754314	NA	1.76092	0.36066	NA	1.45037	0.448463	NA	0.855159	0.670636	NA	-0.530892	0.799181	NA
chrX:690055:-	chrX:690055:-	chrX	690055	690055	-	-0.386274	0.777399	0.987504	-0.594218	0.678781	0.880263	-0.434653	0.753014	0.951016	-0.371043	0.792798	NA	-0.0864221	0.9487	0.987182
chrX:690172:-	chrX:690172:-	chrX	690172	690172	-	-0.271113	0.631708	0.968469	0.740152	0.184825	0.4999	-0.0885811	0.875663	0.978527	-0.500052	0.403309	0.782838	0.462603	0.39779	0.786421
chrX:690203:-	chrX:690203:-	chrX	690203	690203	-	0.119213	0.953914	NA	1.19929	0.553972	NA	0.642393	0.751799	NA	1.25029	0.536119	NA	0.248604	0.902598	NA
chrX:690283:-	chrX:690283:-	chrX	690283	690283	-	0.138432	0.933914	NA	0.60116	0.72177	NA	0.55785	0.736032	NA	-1.72058	0.403296	NA	-1.09999	0.53574	NA
chrX:690446:-	chrX:690446:-	chrX	690446	690446	-	0.338059	0.850085	NA	-0.820478	0.679833	NA	0.00537091	0.997651	NA	-1.91268	0.38209	NA	-1.71732	0.3877	NA
chrX:690533-690649:-	chrX:690588:-	chrX	690533	690649	-	-0.270295	0.120623	0.54602	-0.374523	0.0319588	0.188629	-0.205493	0.238147	0.671367	-0.280993	0.107419	0.477432	-0.281588	0.105733	0.387058
chrX:690911-690925:-	chrX:690925:-	chrX	690911	690925	-	2.21874	0.0805428	0.428558	0.855733	0.530857	0.802987	0.878337	0.508346	0.874375	1.27671	0.338229	NA	-0.748206	0.603329	0.912981
chrX:691000:-	chrX:691000:-	chrX	691000	691000	-	1.73843	0.487439	NA	2.3187	0.355861	NA	1.6854	0.503661	NA	0.0886015	0.974552	NA	0.830129	0.745672	NA
chrX:691067-691068:-	chrX:691067:-	chrX	691067	691068	-	0.351402	0.732326	0.986007	0.994487	0.334239	0.659225	1.01704	0.31453	0.749776	-3.13837	0.0604091	NA	0.155944	0.879386	0.968877
chrX:691172:-	chrX:691172:-	chrX	691172	691172	-	-2.77516	0.192509	NA	-1.01918	0.589249	NA	-0.599947	0.733294	NA	0.0498344	0.977211	NA	-0.0802374	0.962138	NA
chrX:691347-691392:-	chrX:691392:-	chrX	691347	691392	-	3.75668	0.00101112	0.0194157	3.21318	0.00586727	0.0595386	3.85446	0.000753687	0.0162549	0.173539	0.902543	0.978188	-0.240935	0.858058	0.963785
chrX:691415-691433:-	chrX:691415:-	chrX	691415	691433	-	4.01147	0.034841	0.247834	2.87461	0.143617	NA	3.48737	0.0689589	NA	-1.18886	0.615336	NA	-2.05396	0.385336	0.777801
chrX:693259:-	chrX:693259:-	chrX	693259	693259	-	4.47687	0.262099	NA	0.257972	0.951285	NA	-0.240842	0.954516	NA	0.225579	0.957396	NA	-0.639515	0.87962	NA
chrX:693306-693330:-	chrX:693326:-	chrX	693306	693330	-	7.19531	1.75e-05	0.000738912	5.71478	0.000803038	0.0147752	5.9023	0.000480575	0.0114997	3.51784	0.0546473	0.353815	-0.63952	0.771728	0.948208
chrX:694788:-	chrX:694788:-	chrX	694788	694788	-	4.47661	0.201849	NA	1.6602	0.658536	NA	-0.240841	0.949033	NA	0.225581	0.952258	NA	-0.639514	0.865221	NA
chrX:695706-695784:-	chrX:695776:-	chrX	695706	695784	-	0.242339	0.453234	0.917531	0.00409919	0.990068	0.99701	-0.177575	0.586787	0.904267	0.0138222	0.966504	0.990719	-0.410413	0.207618	0.579478
chrX:696934-696960:-	chrX:696960:-	chrX	696934	696960	-	-0.195381	0.826765	0.988315	-1.06767	0.317806	0.646051	0.439087	0.612583	0.914928	-0.812627	0.426645	0.796627	3.08856	0.00011002	0.00158241
chrX:697000-697004:-	chrX:697000:-	chrX	697000	697004	-	-0.0916296	0.949975	0.995883	-2.02096	0.296989	0.62869	1.0469	0.456293	0.851118	-0.938863	0.570939	NA	1.85479	0.175842	0.527378
chrX:698451:-	chrX:698451:-	chrX	698451	698451	-	1.85727	0.297111	NA	0.875995	0.646147	NA	1.07857	0.55734	NA	-0.715366	0.742984	NA	1.20214	0.505124	NA
chrX:698520-698575:-	chrX:698575:-	chrX	698520	698575	-	4.60719	2.79e-23	1.87e-20	3.88219	1.61e-16	7.43e-14	4.52821	1.84e-22	1.64e-19	1.32667	0.0109265	0.147841	0.61509	0.232867	0.616987
chrX:699401-699421:-	chrX:699421:-	chrX	699401	699421	-	0.978147	0.459571	0.919226	2.17496	0.0926633	0.345122	2.45022	0.0523482	0.304882	1.87621	0.151645	NA	1.62036	0.204903	0.57566
chrX:699451:-	chrX:699451:-	chrX	699451	699451	-	4.29788	0.100995	NA	4.38249	0.0971847	NA	1.20027	0.684611	NA	0.225586	0.939164	NA	-0.639512	0.828707	NA
chrX:699571:-	chrX:699571:-	chrX	699571	699571	-	-0.399336	0.758492	0.986786	-0.452722	0.739256	0.90772	0.131393	0.918243	0.983342	-0.6632	0.630784	NA	-0.165016	0.897059	0.973221
chrX:700616-700725:-	chrX:700673:-	chrX	700616	700725	-	0.242103	0.39829	0.892922	-0.150277	0.601789	0.843712	-0.0573585	0.841655	0.974123	-0.200023	0.487458	0.827749	-0.598777	0.0371527	0.189611
chrX:702050-702052:-	chrX:702052:-	chrX	702050	702052	-	-0.623393	0.630726	0.968469	-0.306433	0.817178	0.940547	-0.69713	0.596454	0.908864	-0.443288	0.73993	NA	0.588273	0.63433	0.927924
chrX:702129-702171:-	chrX:702138:-	chrX	702129	702171	-	-0.268369	0.374173	0.877473	0.0679374	0.824511	0.943964	0.225031	0.451935	0.849237	-0.115419	0.70852	0.91948	-0.0299727	0.919902	0.978927
chrX:702192-702230:-	chrX:702212:-	chrX	702192	702230	-	-0.28492	0.475236	0.925039	0.107331	0.790418	0.930554	-0.0114507	0.977051	0.995784	-0.246216	0.548378	0.855895	0.33359	0.392843	0.783026
chrX:702324-702369:-	chrX:702349:-	chrX	702324	702369	-	-0.379867	0.315815	0.834487	0.17259	0.649628	0.866966	-0.19741	0.602287	0.910992	-0.339894	0.3773	0.767424	0.0702292	0.85134	0.961829
chrX:702428-702498:-	chrX:702462:-	chrX	702428	702498	-	-0.0627986	0.856832	0.98946	0.453412	0.194162	0.512408	0.0651635	0.851673	0.974502	-0.140838	0.690567	0.913089	0.0741391	0.830558	0.955136
chrX:702549-702643:-	chrX:702550:-	chrX	702549	702643	-	-0.488454	0.195425	0.692999	0.226197	0.548684	0.813748	-0.0884128	0.813735	0.96943	-0.0663079	0.861646	0.968458	-0.0366452	0.921461	0.979226
chrX:702773-702798:-	chrX:702797:-	chrX	702773	702798	-	-0.0326602	0.895875	0.991867	-0.0424745	0.867602	0.959501	-0.0724816	0.772792	0.957983	-0.300203	0.243163	0.655304	-0.137855	0.579983	0.899086
chrX:703052-703177:-	chrX:703087:-	chrX	703052	703177	-	-0.272146	0.131176	0.570374	0.326255	0.0704075	0.297567	-0.0408569	0.820713	0.970862	0.264127	0.143037	0.540257	-0.368534	0.0409156	0.202715
chrX:703198:-	chrX:703198:-	chrX	703198	703198	-	-0.210872	0.88735	0.990954	-0.53719	0.737856	NA	-0.274767	0.855799	NA	0.160827	0.915519	NA	0.129035	0.92921	0.981799
chrX:703267:-	chrX:703267:-	chrX	703267	703267	-	-1.73337	0.330837	0.844422	-0.542121	0.749952	NA	-1.01057	0.551401	NA	-1.13398	0.527798	NA	0.992787	0.514304	NA
chrX:703578:-	chrX:703578:-	chrX	703578	703578	-	-0.467219	0.870702	NA	-1.25825	0.663806	NA	-0.311738	0.914203	NA	-1.29064	0.655702	NA	3.64348	0.14984	NA
chrX:705056:-	chrX:705056:-	chrX	705056	705056	-	-0.734973	0.624194	0.966353	-2.33437	0.186577	NA	-2.17108	0.188096	NA	-1.7682	0.286701	NA	-3.15722	0.0714801	0.298219
chrX:705122:-	chrX:705122:-	chrX	705122	705122	-	2.54905	0.31843	NA	1.75006	0.529634	NA	-0.240833	0.931707	NA	0.22559	0.93602	NA	5.3999	0.02625	NA
chrX:705165-705284:-	chrX:705244:-	chrX	705165	705284	-	0.0152929	0.954258	0.996166	-0.138433	0.612324	0.848768	-0.229405	0.394722	0.811579	0.13479	0.618382	0.888827	2.68614	4.05e-25	9.79e-23
chrX:705307:-	chrX:705307:-	chrX	705307	705307	-	-0.0897157	0.937084	0.994878	0.525529	0.645657	0.864845	0.101218	0.929091	0.98535	1.39615	0.20145	NA	1.26584	0.236034	0.620786
chrX:705341:-	chrX:705341:-	chrX	705341	705341	-	-1.93642	0.45449	NA	0.786374	0.731635	NA	-1.78194	0.49554	NA	-1.19717	0.6394	NA	0.217561	0.923683	NA
chrX:705433-705451:-	chrX:705433:-	chrX	705433	705451	-	0.420439	0.72617	0.985298	1.08243	0.368171	0.688654	0.759024	0.524723	0.881626	0.776767	0.524454	NA	0.339087	0.776553	0.948208
chrX:706100:-	chrX:706100:-	chrX	706100	706100	-	2.66558	0.317528	NA	1.63945	0.55312	NA	-0.31818	0.915331	NA	0.0714162	0.980763	NA	-2.1624	0.470148	NA
chrX:709730-709735:-	chrX:709730:-	chrX	709730	709735	-	-3.11073	1.32e-05	0.000591808	-3.61005	3.09e-06	0.000187757	-3.31079	5.63e-06	0.000330815	-3.70597	1.95e-06	0.000255036	-2.30944	0.000814574	0.00906656
chrX:711803:-	chrX:711803:-	chrX	711803	711803	-	-0.412867	0.847679	NA	-2.07237	0.381237	NA	0.868853	0.665602	NA	2.04674	0.296524	NA	2.29745	0.23033	NA
chrX:717533:-	chrX:717533:-	chrX	717533	717533	-	-0.403077	0.709863	0.984436	-1.36345	0.261608	0.591548	-0.29345	0.787306	0.962957	-0.849837	0.462518	NA	-0.688988	0.526517	0.868819
chrX:717561-717604:-	chrX:717590:-	chrX	717561	717604	-	-0.232578	0.589893	0.963484	-0.266205	0.545711	0.811813	-0.355528	0.413686	0.823314	-0.682238	0.127563	0.513423	-0.732184	0.0922045	0.355474
chrX:717971:-	chrX:717971:-	chrX	717971	717971	-	-0.37325	0.756264	0.986786	-3.69751	0.0381449	0.209405	-0.75207	0.554468	0.891921	0.819113	0.479573	NA	3.17892	0.00272878	0.0247194
chrX:717994-718018:-	chrX:718004:-	chrX	717994	718018	-	0.414488	0.717928	0.98496	-2.0566	0.239728	0.56856	0.266844	0.820354	0.970862	0.391797	0.745692	NA	3.46122	0.00101171	0.0108402
chrX:718076-718087:-	chrX:718076:-	chrX	718076	718087	-	0.35458	0.605422	0.964942	-0.227254	0.761375	0.917803	0.190766	0.785	0.962251	-0.0888962	0.904012	0.978775	2.10278	0.0012616	0.013074
chrX:719190:-	chrX:719190:-	chrX	719190	719190	-	0.211641	0.901194	NA	-0.747074	0.69445	NA	0.342923	0.841007	NA	-1.71654	0.411682	NA	0.613073	0.713863	NA
chrX:722849:-	chrX:722849:-	chrX	722849	722849	-	1.59527	0.493804	NA	1.84685	0.436212	NA	3.11697	0.168483	NA	0.199464	0.939007	NA	-2.045	0.439433	NA
chrX:723501:-	chrX:723501:-	chrX	723501	723501	-	0.485258	0.818141	NA	0.19137	0.929845	NA	-2.24701	0.368968	NA	-3.22561	0.197421	NA	-4.0907	0.102128	NA
chrX:724192-724200:-	chrX:724200:-	chrX	724192	724200	-	-0.990392	0.0674461	0.383455	-2.56797	0.000145925	0.00414391	-1.5888	0.00531575	0.0676844	-0.00115969	0.998268	0.999337	0.132979	0.797232	0.948208
chrX:725339:-	chrX:725339:-	chrX	725339	725339	-	-1.26597	0.338471	0.849277	-2.88564	0.112589	0.385367	-1.04439	0.429049	0.833006	0.75126	0.53911	NA	0.0910173	0.940215	0.985095
chrX:728861-728867:-	chrX:728861:-	chrX	728861	728867	-	-1.92468	0.118875	0.541509	-1.61767	0.21298	0.535983	-0.720109	0.521707	0.880294	0.949936	0.368921	NA	0.00304373	0.997709	0.999638
chrX:729218:-	chrX:729218:-	chrX	729218	729218	-	-3.88547	0.0319482	0.23377	-2.22357	0.149134	0.446573	-1.3418	0.304955	0.74151	0.715777	0.550208	NA	-0.469209	0.698584	0.948208
chrX:15983:+	chrX:15983:+	chrX	15983	15983	+	1.22861	0.462019	NA	1.0216	0.553727	NA	0.449903	0.79491	NA	-1.45672	0.489887	NA	-0.262395	0.881507	NA
chrX:21877-21965:+	chrX:21952:+	chrX	21877	21965	+	-1.22586	8.4e-08	7.73e-06	-0.931386	6.37e-05	0.00214639	-1.01432	9.18e-06	0.000498473	0.794348	0.00032513	0.014709	-0.436952	0.0494681	0.231935
chrX:22951:+	chrX:22951:+	chrX	22951	22951	+	-3.06359	0.163931	NA	-0.852219	0.653172	NA	-1.8303	0.353342	NA	0.0496481	0.978019	NA	-0.936388	0.604988	NA
chrX:22991-23135:+	chrX:23126:+	chrX	22991	23135	+	-0.818724	0.000177176	0.0049018	-1.1235	3.39e-07	2.85e-05	-0.785392	0.000326819	0.00861722	0.543984	0.0124428	0.15893	-0.790975	0.000286963	0.00367929
chrX:23465-23476:+	chrX:23476:+	chrX	23465	23476	+	-1.63363	0.193151	0.689788	-1.21746	0.343802	0.667641	-1.6624	0.193942	0.614868	0.14138	0.904515	NA	-1.18621	0.324528	0.730634
chrX:23787:+	chrX:23787:+	chrX	23787	23787	+	-0.671392	0.774701	NA	-2.31854	0.362133	NA	0.212108	0.925057	NA	2.3178	0.28084	NA	-1.8153	0.471114	NA
chrX:23885:+	chrX:23885:+	chrX	23885	23885	+	1.88698	0.538271	NA	0.257974	0.936108	NA	-0.240841	0.940343	NA	4.89135	0.0934756	NA	1.63876	0.593929	NA
chrX:23965-23975:+	chrX:23965:+	chrX	23965	23975	+	1.13971	0.545632	0.953312	1.22788	0.535636	0.80553	2.77841	0.115382	0.478469	5.57539	0.00107438	NA	2.21257	0.212301	0.587184
chrX:26877:+	chrX:26877:+	chrX	26877	26877	+	3.66001	0.0857507	0.445819	2.61976	0.255509	NA	2.78835	0.207829	NA	5.62916	0.00691944	NA	1.68946	0.464436	0.830469
chrX:28440-28486:+	chrX:28465:+	chrX	28440	28486	+	-0.568553	0.0799714	0.426397	-1.36628	9.87e-05	0.00307224	-0.795163	0.0159117	0.14045	-0.9157	0.00705932	0.115139	-1.25125	0.000154869	0.00214989
chrX:28513-28518:+	chrX:28518:+	chrX	28513	28518	+	-1.16379	0.0961643	0.478325	-1.15772	0.116181	0.391709	-1.2232	0.0856772	0.407889	-0.949289	0.188905	0.598072	-0.821756	0.226988	0.608413
[truncated: 42,964 more rows]

## Sheet: legend
Supplemental Table S1. Text file with all identified TSSs and their fold change expression versus wild type as measured by 5’cap sequencing.
TSS_cluster	Genomic position of TSS clusters
TSS_peak	Genomic position of TSS cluster peak
Chr	Chromosome
start_cluster	Genomic position of TSS cluster start
end_cluster	Genomic position of TSS cluster end
strand	DNA strand
set2_log2FoldChange	Log2 fold change as measured by DESeq2
set2_pvalue	p-value as measured by DESeq2
set2_padj	adjusted p-value as measured by DESeq2
eaf3_log2FoldChange	Log2 fold change as measured by DESeq2
eaf3_pvalue	p-value as measured by DESeq2
eaf3_padj	adjusted p-value as measured by DESeq2
rco1_log2FoldChange	Log2 fold change as measured by DESeq2
rco1_pvalue	p-value as measured by DESeq2
rco1_padj	adjusted p-value as measured by DESeq2
set1_log2FoldChange	Log2 fold change as measured by DESeq2
set1_pvalue	p-value as measured by DESeq2
set1_padj	adjusted p-value as measured by DESeq2
rrp6_log2FoldChange	Log2 fold change as measured by DESeq2
rrp6_pvalue	p-value as measured by DESeq2
rrp6_padj	adjusted p-value as measured by DESeq2
