# Supplementary material for: Chromatin-sensitive cryptic promoters putatively drive expression of alternative protein isoforms in yeast
Source: HighWire-hosted journal article supplement (doi:10.1101/gr.243378.118), 2019-11-18
Supplement: Supplemental_Table_S2.xlsx [file Supplemental_Table_S2.xlsx]

## Sheet: Sheet1
TSS_cluster	baseMean	log2FoldChange_polyribosome_vs_total	pvalue	padj
chrI:6530-6564:+	130.049	0.193079	0.538899	0.709266
chrI:9327:+	3.68065	-0.743532	0.499364	NA
chrI:9359-9391:+	25.9524	-0.291936	0.588306	0.748475
chrI:9420:+	3.65208	-0.632941	0.631197	NA
chrI:11285-11343:+	118.112	-0.458922	0.0966851	0.238083
chrI:16988-17006:+	18.2102	-0.476247	0.392447	0.586526
chrI:21246:+	0.166197	1.73952	0.727058	NA
chrI:21297:+	0	NA	NA	NA
chrI:23372-23403:+	18.0107	-0.670806	0.22042	0.406935
chrI:23711-23713:+	92.2841	1.88942	7.22e-08	5.87e-06
chrI:23780:+	10.8012	-0.618971	0.384479	0.579313
chrI:23817:+	12.9192	-0.625955	0.346763	0.540968
chrI:24838-24850:+	15.0181	0.403562	0.468047	0.65231
chrI:24965:+	1.79282	-0.530111	0.741667	NA
chrI:25056:+	0.311541	-0.453276	0.91429	NA
chrI:30047-30048:+	9.55743	-1.31195	0.0893087	0.22595
chrI:30118-30177:+	189.777	-2.18906	8.17e-13	3.19e-10
chrI:30203-30222:+	47.7848	-1.78391	0.00547878	0.0332681
chrI:30435:+	1.22344	-1.91182	0.385066	NA
chrI:31056:+	4.76776	-1.23295	0.330695	NA
chrI:31087:+	3.72686	0.801587	0.500057	NA
chrI:31108-31145:+	114.557	0.109111	0.694166	0.823275
chrI:31179-31272:+	601.428	0.0239342	0.90074	0.948369
chrI:31307-31343:+	34.1339	0.0746142	0.866411	0.929098
chrI:31364:+	5.62421	-0.13648	0.892081	NA
chrI:31521-31532:+	23.3818	0.553367	0.239037	0.429537
chrI:31696-31729:+	63.5283	-0.426813	0.155691	0.326278
chrI:31756:+	7.45604	-0.43351	0.563883	0.729451
chrI:31777:+	3.32735	0.115802	0.919919	NA
chrI:31861:+	12.8767	0.24078	0.7628	0.865188
chrI:31981:+	1.09565	-0.92444	0.640616	NA
chrI:32679:+	2.81448	0.174415	0.908757	NA
chrI:33171-33185:+	39.6556	-1.46877	0.00192273	0.0155872
chrI:33223:+	2.26825	-0.677804	0.679762	NA
chrI:33281-33284:+	4.2216	-0.23226	0.823526	NA
chrI:33307:+	2.6006	0.492335	0.71882	NA
chrI:33329-33392:+	526.782	0.202009	0.295446	0.490279
chrI:33767:+	5.93432	-0.442741	0.656772	NA
chrI:34309:+	2.34195	0.59621	0.712487	NA
chrI:34664-34739:+	250.338	-1.17023	0.00015753	0.00246152
chrI:34777:+	3.29348	1.77983	0.438768	NA
chrI:34805-34813:+	22.9082	0.619919	0.233063	0.421968
chrI:34846-34864:+	20.9937	-0.136621	0.820176	0.900648
chrI:34907:+	6.64009	-2.58321	0.050212	NA
chrI:34977-35155:+	964.218	1.00763	1.86e-06	7.91e-05
chrI:35185-35188:+	120.989	-0.269337	0.262602	0.45559
chrI:35734:+	1.0559	-3.54975	0.157881	NA
chrI:36463:+	8.43223	1.43148	0.0641091	0.182073
chrI:36504-36595:+	2011.56	0.68338	0.000308349	0.00403758
chrI:37357-37427:+	559.743	0.0156083	0.929673	0.963864
chrI:37449-37464:+	37.3959	0.187341	0.652896	0.796102
chrI:38010:+	1.37647	1.47337	0.399024	NA
chrI:39187-39271:+	409.193	-0.176955	0.312782	0.5081
chrI:40501:+	0	NA	NA	NA
chrI:41013:+	0.241888	0.352439	0.940533	NA
chrI:41262-41298:+	11.7086	1.3738	0.0800579	0.210195
chrI:41319:+	0	NA	NA	NA
chrI:41379:+	0.715853	-2.16135	0.413955	NA
chrI:42104:+	3.50655	-0.256593	0.859026	NA
chrI:42134-42221:+	1791.62	0.666574	0.000980027	0.00939761
chrI:42342:+	6.79942	0.514253	0.616199	NA
chrI:42399:+	2.14029	0.898684	0.521022	NA
chrI:42828:+	4.88712	-2.06451	0.29851	NA
chrI:42856:+	2.03092	-0.666696	0.758889	NA
chrI:42877-42880:+	15.1007	-2.40612	0.025506	0.0977521
chrI:43037:+	1.46189	0.372243	0.891095	NA
chrI:43089:+	7.89895	-1.01192	0.47802	0.660898
chrI:43160:+	5.43041	0.973943	0.332455	NA
chrI:43205:+	11.1311	-0.560278	0.413372	0.606744
chrI:43438:+	44.0216	-0.680904	0.103361	0.249022
chrI:43469:+	44.119	-0.691278	0.103798	0.249526
chrI:43541:+	0.798818	-1.92361	0.535266	NA
chrI:44209:+	0	NA	NA	NA
chrI:44801:+	0.289811	0.372281	0.940446	NA
chrI:44921:+	0.614704	-2.99325	0.317855	NA
chrI:45693-45697:+	28.4034	-0.203555	0.693247	0.822727
chrI:45721-45849:+	499.123	-0.409651	0.0765808	0.203872
chrI:45871-45899:+	12.2224	-1.15438	0.0869408	0.22229
chrI:47021-47034:+	1.0118	-0.301758	0.892375	NA
chrI:48222:+	0	NA	NA	NA
chrI:48484-48511:+	137.294	-0.211563	0.438214	0.628169
chrI:48534-48593:+	470.491	-0.515128	0.00719987	0.0402677
chrI:48779-48795:+	14.1103	-0.130731	0.829345	0.90605
chrI:50825-50867:+	2.20721	0.165741	0.910707	NA
chrI:52829-52851:+	4.15803	-1.25761	0.3457	NA
chrI:54214:+	3.56169	-0.0465598	0.96831	NA
chrI:54918-54921:+	8.00437	-0.788704	0.487052	0.668429
chrI:56978-56984:+	41.0159	-1.12957	0.00599913	0.0354575
chrI:57432:+	2.53906	-0.41825	0.762279	NA
chrI:57465-57532:+	2243.27	0.693656	0.000407062	0.00499153
chrI:61261-61328:+	4927.93	0.423553	0.0520199	0.15873
chrI:61447-61464:+	11.9421	-0.045654	0.944963	0.971977
chrI:61606:+	0.940997	-3.81242	0.133735	NA
chrI:61632-61658:+	5.20872	-2.64569	0.0219524	NA
chrI:61723:+	0.350733	-3.08248	0.489582	NA
chrI:61762-61774:+	9.12718	0.56838	0.442029	0.631598
chrI:61829:+	0.810076	-1.02442	0.757757	NA
chrI:62088:+	0.485452	-2.2464	0.59182	NA
chrI:62124:+	1.17694	1.28499	0.514364	NA
chrI:62275:+	5.49518	1.94386	0.0795926	NA
chrI:62310-62311:+	1.83251	-3.86325	0.0610403	NA
chrI:62374-62385:+	2.35257	-0.0462194	0.974716	NA
chrI:62412-62421:+	5.95013	1.14119	0.235712	NA
chrI:62448-62460:+	13.5676	1.81324	0.00749708	0.0415135
chrI:62765-62832:+	1001.23	-0.423223	0.0399223	0.133457
chrI:62936:+	8.81561	-0.253162	0.751229	0.858375
chrI:65262:+	0.319768	-1.20042	0.780037	NA
chrI:65308-65324:+	1.64821	1.10099	0.526536	NA
chrI:65442:+	0.365165	3.5047	0.429924	NA
chrI:65470-65478:+	1.03386	-0.331415	0.86832	NA
chrI:65502-65527:+	1.55132	0.965456	0.560336	NA
chrI:65679-65681:+	0.490635	-1.23043	0.705665	NA
chrI:65704:+	1.06846	-1.10785	0.592606	NA
chrI:68003-68026:+	15.3193	-2.61211	0.137019	0.300786
chrI:68174:+	3.80343	-0.75412	0.6083	NA
chrI:68195:+	3.39448	-0.691256	0.57927	NA
chrI:68692-68732:+	91.7458	-1.23139	0.000615326	0.00674843
chrI:69944-69947:+	16.9056	-0.00945336	0.985841	0.992103
chrI:70045:+	8.40598	-1.06033	0.204637	0.388283
chrI:71552:+	13.1877	-1.44747	0.0670005	0.187334
chrI:71644-73230:+	14183.6	0.0612045	0.800953	0.889052
chrI:73439:+	6.63244	0.260703	0.757385	NA
chrI:73836-73851:+	30.4457	-0.856817	0.0509177	0.156795
chrI:73872-73952:+	124.88	-0.471106	0.0668687	0.187054
chrI:76335-76452:+	7870.48	0.571925	0.06947	0.191552
chrI:76483-76485:+	2.34745	-0.643151	0.714274	NA
chrI:76555:+	0.471654	-2.9913	0.3566	NA
chrI:76587:+	0.9848	-3.72036	0.139674	NA
chrI:76619:+	5.95384	0.565276	0.613611	NA
chrI:76641:+	1.94723	1.27425	0.411381	NA
chrI:76666-76671:+	29.8153	0.372743	0.425719	0.617738
chrI:76709-76715:+	13.0965	0.753019	0.205053	0.3888
chrI:76860:+	3.65962	0.312621	0.787228	NA
chrI:76883-76894:+	127.957	0.437086	0.270811	0.464381
chrI:76926:+	1.14217	-1.85801	0.411661	NA
chrI:76952-77020:+	544.009	1.08657	0.00297378	0.0212875
chrI:77061:+	1.94403	1.28189	0.426808	NA
chrI:77093-77095:+	3.4676	0.6647	0.555884	NA
chrI:77166-77199:+	39.5231	0.470924	0.240021	0.430292
chrI:77240:+	1.78709	0.0944484	0.953569	NA
chrI:77338:+	0.311558	0.352842	0.935547	NA
chrI:77441:+	32.0355	0.106507	0.805546	0.891687
chrI:77491:+	0.214575	0.372276	0.940618	NA
chrI:77513-77516:+	4.49867	-1.85801	0.132635	NA
chrI:77804:+	1.55151	-4.30507	0.0509459	NA
chrI:78288:+	0.372825	-1.0165	0.822968	NA
chrI:78330:+	0.58429	-1.3324	0.638175	NA
chrI:78536:+	0.0996757	-1.21606	0.806891	NA
chrI:78627:+	0.0756909	-1.01506	0.838727	NA
chrI:78714:+	0.0756909	-1.01506	0.838727	NA
chrI:78765:+	0.287956	0.372281	0.940617	NA
chrI:78807-78836:+	9.02791	-0.917956	0.249174	0.440194
chrI:78985:+	0.0928172	1.73951	0.727061	NA
chrI:79045:+	11.0852	0.976136	0.146845	0.313383
chrI:79081-79115:+	95.3639	1.2173	6.85e-05	0.0013403
chrI:79258:+	0.248747	-2.0812	0.649928	NA
chrI:79361:+	0.492442	-1.23003	0.700705	NA
chrI:79674-79718:+	1441.13	0.466503	0.00280177	0.0203581
chrI:80559:+	0.166197	1.73952	0.727058	NA
chrI:80923-80938:+	0.365502	-1.01866	0.80222	NA
chrI:82226-82237:+	5.6014	-1.92042	0.273002	NA
chrI:82665-82766:+	1777.42	0.712848	0.000468922	0.00551117
chrI:83072:+	0.957329	2.77379	0.307056	NA
chrI:83119:+	1.13812	-0.872539	0.691501	NA
chrI:87237-87294:+	2857.18	0.618433	0.00285559	0.0206498
chrI:87321-87329:+	15.327	0.135152	0.813392	0.897104
chrI:87595:+	0	NA	NA	NA
chrI:92388:+	5.77442	0.679855	0.447938	NA
chrI:92836-92859:+	281.869	-0.329548	0.100761	0.245315
chrI:92885-92893:+	59.046	-0.230585	0.500929	0.680303
chrI:93718:+	0	NA	NA	NA
chrI:94106-94114:+	3.137	1.11615	0.436053	NA
chrI:94250-94278:+	6.88865	1.39505	0.123842	NA
chrI:94310:+	1.05032	-2.0733	0.408818	NA
chrI:94549:+	1.04536	-1.41363	0.521807	NA
chrI:94579-94695:+	770.935	0.00402208	0.982051	0.990759
chrI:95059:+	3.89943	0.164202	0.882504	NA
chrI:95118-95176:+	71.8084	0.0447577	0.887099	0.939675
chrI:95242-95250:+	2.01215	-0.698288	0.64839	NA
chrI:95279-95305:+	5.12571	0.405969	0.683213	NA
chrI:95331-95355:+	6.20071	1.43787	0.118338	NA
chrI:96033-96063:+	0	NA	NA	NA
chrI:101399-101418:+	18.7591	-0.436998	0.674284	0.808639
chrI:101445-101465:+	24.0935	-3.66252	0.0237166	0.0932914
chrI:110643-110680:+	65.3793	0.250654	0.439998	0.62966
chrI:110701:+	0.635036	-0.688006	0.798275	NA
chrI:110727:+	2.03435	-0.746948	0.632045	NA
chrI:113552-113595:+	80.4638	-1.16431	0.0121045	0.0577993
chrI:114786-114832:+	533.064	-0.413349	0.131355	0.292156
chrI:114858-114862:+	14.74	-0.387181	0.521424	0.696151
chrI:116487:+	0.0733802	0.372257	0.940621	NA
chrI:118061-118063:+	1.25661	-1.11311	0.621003	NA
chrI:119850-119891:+	304.132	-0.584317	0.00707424	0.0398172
chrI:119960:+	3.35932	0.484029	0.698303	NA
chrI:120209:+	3.02867	-1.32192	0.356081	NA
chrI:122135:+	0.14676	0.372269	0.940619	NA
chrI:123230:+	0	NA	NA	NA
chrI:123523:+	0	NA	NA	NA
chrI:123544-123583:+	1.56237	-0.907119	0.595434	NA
chrI:124782-124845:+	2419.21	-0.0833094	0.707407	0.832029
chrI:124874:+	1.63094	-2.02673	0.334289	NA
chrI:125726:+	0.0928172	1.73951	0.727061	NA
chrI:126111:+	0.148567	0.372254	0.940621	NA
chrI:127043-127048:+	4.35015	0.362634	0.866662	NA
chrI:127087:+	3.52786	-2.06703	0.322853	NA
chrI:128209:+	5.55415	-2.71765	0.0238813	NA
chrI:129200-129254:+	2960.14	0.576246	0.000504452	0.00581218
chrI:129402:+	2.5693	-0.212193	0.877281	NA
chrI:130686-130799:+	5288.87	0.359407	0.110617	0.260068
chrI:130973-130977:+	2.09986	0.431389	0.783387	NA
chrI:131008:+	0.0756909	-1.01506	0.838727	NA
chrI:131045:+	0.393652	-2.07905	0.553959	NA
chrI:131317:+	0.244199	-0.52467	0.91461	NA
chrI:131537:+	1.19198	-4.30664	0.0604765	NA
chrI:131572:+	1.51054	0.465739	0.786611	NA
chrI:131783:+	0.321808	3.33506	0.47409	NA
chrI:131847-131867:+	4.4078	-0.725214	0.511499	NA
chrI:132160-132208:+	851.486	0.469844	0.00922807	0.0480651
chrI:132665:+	0.638689	-3.08004	0.293444	NA
chrI:133017:+	0.405726	2.58522	0.505669	NA
chrI:133332-133410:+	13.3982	0.976796	0.135635	0.298908
chrI:133442:+	0.209554	2.01972	0.684287	NA
chrI:133902:+	0	NA	NA	NA
chrI:135777-135869:+	1180.08	0.331401	0.0340242	0.119128
chrI:135987:+	1.33048	-4.03758	0.0754446	NA
chrI:136247:+	4.64135	-0.492918	0.610332	NA
chrI:136473-136477:+	6.35877	0.0683017	0.935133	NA
chrI:136526:+	1.50412	0.734203	0.721834	NA
chrI:136561:+	0.365549	-0.873425	0.828415	NA
chrI:136613-136614:+	0.28339	0.616207	0.890409	NA
chrI:136717:+	1.00805	1.39688	0.521846	NA
chrI:136796-136911:+	2063.83	0.823081	3.06e-07	1.89e-05
chrI:137013:+	0.168508	0.352204	0.943547	NA
chrI:137064:+	1.84573	0.177015	0.910819	NA
chrI:137106:+	1.59762	0.634761	0.696324	NA
chrI:137142-137146:+	5.91874	0.525155	0.537225	NA
chrI:137169-137186:+	10.3359	1.05982	0.127904	0.286526
chrI:137273-137285:+	5.61809	1.51966	0.0920672	NA
chrI:137417:+	1.46404	0.223182	0.91729	NA
chrI:138533:+	0.391797	-2.07906	0.554381	NA
chrI:138554-138665:+	166.562	-0.326689	0.209776	0.394549
chrI:139140:+	20.7197	-0.685041	0.385995	0.580905
chrI:139219:+	0	NA	NA	NA
chrI:139395:+	5.43312	-1.70627	0.353341	NA
chrI:139418:+	2.52072	1.46667	0.41596	NA
chrI:142045-142054:+	25.3832	-0.186955	0.700452	0.827142
chrI:142109-142226:+	8785.39	0.5177	0.0848813	0.218489
chrI:142256:+	0.728309	-0.356203	0.890575	NA
chrI:142322-142341:+	6.4683	-1.15625	0.201009	NA
chrI:142365-142386:+	378.125	-2.17108	5.05e-17	4.14e-14
chrI:142415-142445:+	91.7846	-0.560222	0.30165	0.496336
chrI:142619-143115:+	1041.61	0.492677	0.0554778	0.165345
chrI:143140-143153:+	3.04302	-1.3368	0.323236	NA
chrI:143177-143232:+	271.939	1.4697	4.13e-09	5.55e-07
chrI:143254-143266:+	16.6595	0.970046	0.164745	0.338973
chrI:143426-143442:+	4.9102	-2.07149	0.102636	NA
chrI:143533-143587:+	125.696	-0.287013	0.277673	0.471898
chrI:143616-143675:+	142.971	-0.76928	0.0025822	0.0191639
chrI:146305:+	0.339709	-0.705625	0.847519	NA
chrI:146338-146353:+	2.29291	0.0733649	0.957663	NA
chrI:146389-146400:+	0.507192	0.560609	0.870302	NA
chrI:146602:+	0.0756909	-1.01506	0.838727	NA
chrI:147418-147434:+	11.8422	0.241384	0.757345	0.861637
chrI:147478:+	2.58762	0.387833	0.875598	NA
chrI:147620:+	0.248243	-1.21604	0.806893	NA
chrI:152163-152252:+	1715.88	0.188831	0.300492	0.495444
chrI:152780:+	0.296287	-1.89766	0.661856	NA
chrI:152861:+	0.0733802	0.372257	0.940621	NA
chrI:153116:+	0.0715251	0.372256	0.940621	NA
chrI:153489:+	0.224762	-1.89191	0.699833	NA
chrI:153545:+	0.318417	-2.08068	0.623043	NA
chrI:153651-153654:+	1.12766	-1.12298	0.662436	NA
chrI:153690-153736:+	39.1374	0.598992	0.13237	0.293526
chrI:153772:+	0.960498	-1.02975	0.725053	NA
chrI:154884-154923:+	309.043	-0.0838615	0.685387	0.816759
chrI:154951-154964:+	290.948	-0.407857	0.0384029	0.130047
chrI:154988:+	6.30614	-0.762495	0.39778	NA
chrI:155783:+	0.320272	-2.07972	0.579747	NA
chrI:155981:+	0.241384	1.73952	0.727059	NA
chrI:156037-156038:+	1.25339	-4.03722	0.0855534	NA
chrI:156764:+	0.0996757	-1.21606	0.806891	NA
chrI:158832-158906:+	924.68	0.441167	0.00445327	0.0286803
chrI:159176:+	0.265873	0.161048	0.971902	NA
chrI:160066:+	1.12438	0.650319	0.741055	NA
chrI:160097-160101:+	11.7614	0.293096	0.673496	0.808206
chrI:166205:+	1.95792	0.529203	0.727579	NA
chrI:166257-166259:+	7.45287	-3.53589	0.0252601	0.0972187
chrI:166303-166305:+	0.44998	-3.20564	0.44247	NA
chrI:166446:+	0.282934	2.01974	0.684283	NA
chrI:169198:+	1.22614	2.99545	0.245038	NA
chrI:169224-169345:+	3249.29	0.32398	0.0584513	0.170764
chrI:169853-169866:+	5.46345	-5.91891	0.000490857	NA
chrI:169984:+	0.788224	-1.61038	0.534465	NA
chrI:170187:+	0.463331	1.74641	0.644305	NA
chrI:170862:+	0.224762	-1.89191	0.699833	NA
chrI:171921-171965:+	84.2229	-0.815443	0.00776595	0.0426141
chrI:171989-172034:+	44.5877	0.448872	0.367199	0.562315
chrI:172152:+	0.650747	-0.360812	0.905035	NA
chrI:172799:+	0	NA	NA	NA
chrI:175292-175314:+	380.329	-0.75551	0.000937564	0.00913457
chrI:175342-175359:+	24.5739	-0.866215	0.0687952	0.190701
chrI:175382-175394:+	14.4984	-1.21223	0.0571302	0.168469
chrI:176322-176354:+	11.8437	-0.852162	0.18387	0.362897
chrI:176383:+	0.328667	1.263	0.759809	NA
chrI:176697:+	1.53637	-1.82476	0.309192	NA
chrI:179560:+	1.64696	-0.0143171	0.993801	NA
chrI:179856:+	1.30044	-1.91177	0.391729	NA
chrI:179896:+	1.32312	-0.0209227	0.9918	NA
chrI:180201-180269:+	125.999	-0.972753	0.0127845	0.0600492
chrI:180400-180420:+	6.49637	-0.471653	0.668583	NA
chrI:181353-181379:+	18.5765	-1.31077	0.111478	0.261352
chrI:181410-181446:+	38.6696	-2.61471	0.00107735	0.0101122
chrI:183245:+	1.46519	-1.31824	0.487757	NA
chrI:183614-183626:+	6.80332	0.488822	0.564557	NA
chrI:183668-183689:+	908.231	0.277579	0.186234	0.365626
chrI:183754-183770:+	13.4277	-0.547678	0.377128	0.572125
chrI:183794-183800:+	3.29971	-3.204	0.0261641	NA
chrI:184803-184892:+	1727.5	-0.216727	0.291258	0.485928
chrI:185905-185918:+	10.6306	-0.338777	0.612704	0.766908
chrI:186290-186327:+	10.5713	0.340658	0.592398	0.751481
chrI:186915-186919:+	7.07022	0.707625	0.422395	NA
chrI:186941-187006:+	244.841	0.60261	0.00611212	0.0359174
chrI:187364:+	4.48221	-0.329887	0.756182	NA
chrI:187396-187410:+	64.6498	0.70108	0.025534	0.0977733
chrI:188032-188065:+	1015.06	0.282237	0.0971836	0.238768
chrI:188091:+	3.80281	0.896158	0.406479	NA
chrI:188680:+	0.373833	-2.47298	0.585259	NA
chrI:188854-188892:+	103.544	-0.302641	0.234913	0.424164
chrI:188932-188944:+	12.4507	-0.784026	0.220889	0.407433
chrI:190495:+	8.13811	0.615439	0.413474	0.606841
chrI:191924-191933:+	18.6162	0.33835	0.511021	0.688933
chrI:192530-192619:+	1284.12	-0.0395321	0.814233	0.897368
chrI:193323:+	1.11699	0.397111	0.885536	NA
chrI:194833-194861:+	1.94542	-2.79392	0.169088	NA
chrI:195178:+	0.324438	-2.60546	0.525836	NA
chrI:198736-198764:+	171.52	-0.134733	0.572364	0.736231
chrI:198785-198794:+	16.5128	0.0220328	0.96881	0.983231
chrI:198818-198837:+	43.4098	-0.406535	0.264908	0.458378
chrI:198900-198907:+	11.8485	-0.557846	0.402666	0.596411
chrI:198937-198946:+	7.4969	-0.584046	0.480499	0.663152
chrI:199048:+	1.4839	-0.0477538	0.977251	NA
chrI:199071:+	2.11309	0.573375	0.689835	NA
chrI:199256:+	4.98465	-1.75121	0.0766344	NA
chrI:199295:+	3.76631	-0.770397	0.513184	NA
chrI:199341:+	1.12899	-1.39919	0.519586	NA
chrI:199373:+	0.175367	-2.08156	0.670483	NA
chrI:199400:+	0.300453	-2.47073	0.611702	NA
chrI:199435-199447:+	1.89872	-1.37215	0.437455	NA
chrI:200618-200647:+	127.643	-0.173406	0.536953	0.707808
chrI:207887:+	4.71169	0.714542	0.536522	NA
chrI:208222-208224:+	16.2852	-0.559592	0.330321	0.525663
chrI:227481-227521:+	210.54	-0.806536	0.0261738	0.0994446
chrI:227543:+	2.47968	-1.98048	0.369162	NA
chrI:6319-6355:-	71.2428	-0.241434	0.426148	0.618143
chrI:9183-9191:-	16.6546	0.290198	0.63861	0.786908
chrI:9227-9257:-	14.5269	-0.944161	0.164306	0.338451
chrI:11115-11167:-	14.1278	-2.16291	0.0165108	0.0718356
chrI:17840:-	1.01964	-0.134867	0.950167	NA
chrI:20592:-	0.657214	-0.84388	0.783463	NA
chrI:20780:-	3.58792	-2.39675	0.184487	NA
chrI:23627-23639:-	25.7658	-1.09328	0.0646941	0.183196
chrI:23791-23793:-	8.53519	0.23261	0.809783	0.894086
chrI:23822:-	5.17037	0.288442	0.782716	NA
chrI:24744-24747:-	10.5052	-0.765249	0.24733	0.438034
chrI:25020:-	0.0733802	0.372257	0.940621	NA
chrI:25518:-	0	NA	NA	NA
chrI:28479:-	0.246892	-2.08121	0.650739	NA
chrI:29738-29776:-	170.774	-1.38811	1.47e-06	6.58e-05
chrI:30755-30859:-	189.588	-2.08515	1.93e-07	1.29e-05
chrI:30884-30934:-	71.68	-0.686073	0.142904	0.308829
chrI:31017-31025:-	8.93431	-4.41191	0.00718531	0.0402215
chrI:31442:-	1.38193	1.42494	0.440198	NA
chrI:31512:-	1.48584	0.242897	0.899839	NA
chrI:31538:-	2.70782	0.238689	0.855294	NA
chrI:31588-31608:-	33.1291	1.07098	0.0145446	0.0657031
chrI:31907:-	1.01573	-3.60874	0.136903	NA
chrI:32501:-	13.2229	-0.255872	0.677256	0.810831
chrI:32549:-	32.9818	-0.932558	0.0640493	0.181935
chrI:32708:-	14.9894	-0.112741	0.862433	0.926529
chrI:32749-32754:-	16.9453	0.114005	0.860086	0.925175
chrI:32951-32982:-	103.399	-0.623812	0.0260133	0.0990502
chrI:34343-34358:-	225.747	-0.642191	0.00736341	0.0409114
chrI:35067-35083:-	17.1744	-0.971105	0.110003	0.259015
chrI:36288:-	5.10485	-2.89042	0.0845907	NA
chrI:36331-36384:-	277.59	-1.45996	1.04e-08	1.16e-06
chrI:37252:-	9.23412	-1.1975	0.184738	0.363952
chrI:37278:-	0.721767	0.51206	0.85933	NA
chrI:39037:-	0.698352	0.317602	0.911197	NA
chrI:42701:-	17.2267	0.127121	0.835369	0.909664
chrI:42737-42739:-	79.434	0.266414	0.431892	0.623165
chrI:42902:-	5.0346	-0.53709	0.627879	NA
chrI:42926:-	12.5731	-0.134692	0.835545	0.909734
chrI:42951:-	24.1883	-0.222246	0.625761	0.777262
chrI:43066:-	40.1824	0.20112	0.612228	0.766546
chrI:43088-43129:-	102.262	0.0165775	0.954117	0.976618
chrI:43255-43272:-	20.1109	-0.573187	0.273917	0.467976
chrI:43318-43330:-	7.80206	-0.113574	0.884647	0.938169
chrI:43593-43630:-	33.4209	0.317187	0.447038	0.635797
chrI:45663-45672:-	21.6755	-0.811456	0.102455	0.247676
chrI:45699:-	2.60309	-1.90125	0.207079	NA
chrI:52233:-	0.836428	0.63311	0.787251	NA
chrI:52283:-	1.70169	-0.207434	0.900928	NA
chrI:52601-52707:-	1590.91	0.704149	5.15e-06	0.000183297
chrI:54766-54822:-	284.264	-0.684293	0.00384108	0.0257666
chrI:55232-55253:-	12.0404	0.647835	0.322616	0.517979
chrI:55313-55325:-	1.18069	-0.362883	0.842477	NA
chrI:55711-55721:-	2.25564	1.63154	0.257917	NA
chrI:55794:-	0.879803	1.27631	0.560724	NA
chrI:56148:-	0.317075	0.352932	0.934379	NA
chrI:56204:-	1.79768	-1.1043	0.47484	NA
chrI:56857-56897:-	434.727	-0.312574	0.109701	0.258564
chrI:57195:-	6.66792	0.206131	0.813927	NA
chrI:57329-57445:-	1040.27	0.315313	0.173295	0.350803
chrI:57489:-	0.759869	2.50095	0.385303	NA
chrI:57978-57980:-	3.02566	0.15698	0.900777	NA
chrI:58027-58035:-	7.89731	0.999237	0.236311	0.425874
chrI:58057-58069:-	13.0904	0.572089	0.406139	0.599453
chrI:58136:-	0	NA	NA	NA
chrI:58201-58227:-	39.6891	0.481726	0.340316	0.53467
chrI:58252-58273:-	54.013	0.706058	0.0412597	0.136427
chrI:58326-58344:-	54.4588	-0.839003	0.0147827	0.0664858
chrI:58379-58387:-	36.7472	-1.18604	0.00244159	0.0184681
chrI:58442-58519:-	5837.75	0.478109	0.170383	0.34689
chrI:61053-61093:-	706.58	-0.186445	0.336894	0.53138
chrI:62535:-	0.906825	-3.29901	0.212193	NA
chrI:65513:-	0.728139	0.372253	0.911298	NA
chrI:67811:-	18.7037	-0.813255	0.186607	0.366096
chrI:67833-67896:-	857.046	-0.453599	0.0655756	0.184672
chrI:67923-67962:-	154.235	-0.994601	0.0141002	0.0641726
chrI:68014-68091:-	292.033	-0.842679	0.00400056	0.0264559
chrI:68285:-	28.1797	-0.375067	0.515965	0.692663
chrI:69548-69648:-	1763.52	0.430161	0.00857611	0.0458333
chrI:71509-71519:-	23.0462	-0.126748	0.788389	0.881077
chrI:72098-72099:-	0	NA	NA	NA
chrI:72913:-	0	NA	NA	NA
chrI:73571:-	7.61639	-0.537057	0.593987	0.752726
chrI:73661:-	1.51658	0.439402	0.795855	NA
chrI:75111-75130:-	18.5388	0.748534	0.18029	0.358721
chrI:75384:-	1.90992	2.42626	0.175341	NA
chrI:75664:-	0.411234	-0.703598	0.840617	NA
chrI:75731:-	0.311541	-0.453276	0.91429	NA
chrI:75823:-	0	NA	NA	NA
chrI:75886:-	0.147216	-1.01505	0.83873	NA
chrI:76159-76224:-	2756.89	0.571744	0.0158762	0.0699008
chrI:80575:-	1.13401	-2.614	0.289985	NA
chrI:80614:-	0.495255	0.771337	0.828098	NA
chrI:80776-80784:-	1.67761	-0.146188	0.941291	NA
chrI:81834-81840:-	3.71103	-0.474252	0.721886	NA
chrI:81862:-	0.209554	2.01972	0.684287	NA
chrI:81894-81917:-	2.02343	-0.160961	0.908259	NA
chrI:81974-81997:-	60.1668	-0.267662	0.390944	0.585137
chrI:82018:-	2.38379	-0.714183	0.596611	NA
chrI:82562-82612:-	403.727	0.0461624	0.818103	0.8997
chrI:82661:-	2.29944	-1.19169	0.450694	NA
chrI:83436-83454:-	1.4201	0.0776874	0.96535	NA
chrI:83817:-	0.538175	-1.11232	0.727465	NA
chrI:84225:-	2.02278	-1.61378	0.292079	NA
chrI:84264-84292:-	54.3118	-0.452953	0.18059	0.359057
chrI:84465-84528:-	843.3	-0.106921	0.612776	0.766932
chrI:85355:-	0.270876	-2.25273	0.644372	NA
chrI:85376-85427:-	9.4971	-0.21426	0.7634	0.865479
chrI:85862-85876:-	0.95966	0.348422	0.864964	NA
chrI:87057-87078:-	250.466	-0.298539	0.182539	0.361618
chrI:88455:-	0.395459	-2.07905	0.553999	NA
chrI:89038:-	0	NA	NA	NA
chrI:89491:-	0.148567	0.372254	0.940621	NA
chrI:89896:-	0.344257	-2.24567	0.58633	NA
chrI:90435:-	4.58254	-5.44814	0.00184943	NA
chrI:91771:-	0.218285	0.372276	0.940618	NA
chrI:92261:-	1.53543	-1.40704	0.454734	NA
chrI:92287-92307:-	32.8943	-0.749226	0.0802927	0.210744
chrI:92403:-	2.29215	-0.189376	0.897136	NA
chrI:92444-92547:-	706.753	-0.103351	0.579416	0.74142
chrI:93681:-	0	NA	NA	NA
chrI:94447-94476:-	21.0266	-1.79572	0.137555	0.301479
chrI:95629:-	0.251058	-2.6043	0.592038	NA
chrI:95664:-	0.222451	-1.01503	0.838732	NA
chrI:95710:-	0	NA	NA	NA
chrI:95830-95848:-	9.57528	0.436859	0.560043	0.726076
chrI:95872-95883:-	1.3704	1.27821	0.495637	NA
chrI:95904-95920:-	3.61354	0.54312	0.7228	NA
chrI:96476:-	0	NA	NA	NA
chrI:96586:-	1.07177	-0.66499	0.811564	NA
chrI:96635:-	0.738551	-1.02105	0.782351	NA
chrI:97224-97249:-	0.541333	-0.535978	0.878239	NA
chrI:97587:-	0.175367	-2.08156	0.670483	NA
chrI:98219:-	0	NA	NA	NA
chrI:98609:-	0	NA	NA	NA
chrI:99758-99811:-	482.697	-0.504901	0.0180967	0.0767414
chrI:100146:-	1.32584	2.81792	0.239466	NA
chrI:100335-100341:-	115.474	0.786264	0.00370659	0.0251297
chrI:100409:-	0.248243	-1.21604	0.806893	NA
chrI:100431-100433:-	1.01766	0.211082	0.925621	NA
chrI:100494-100500:-	41.8232	0.740145	0.0454105	0.145688
chrI:100550-100560:-	17.5313	1.4815	0.01323	0.0615784
chrI:100602:-	28.436	1.57538	0.00226543	0.017435
chrI:100686:-	0.728307	3.48991	0.237746	NA
chrI:100758-100763:-	6.56492	-0.471688	0.566836	NA
chrI:100883:-	0.769217	-3.24672	0.302655	NA
chrI:100985:-	2.37528	-4.36875	0.025841	NA
chrI:101145-101225:-	3486.61	0.351519	0.0353896	0.122394
chrI:101248:-	1.72298	0.158478	0.926795	NA
chrI:101753:-	0.319768	-1.20042	0.780037	NA
chrI:102187:-	0.192493	0.151194	0.975687	NA
chrI:102276:-	0.0733802	0.372257	0.940621	NA
chrI:102364:-	0.0733802	0.372257	0.940621	NA
chrI:102705:-	0	NA	NA	NA
chrI:102825:-	0.224762	-1.89191	0.699833	NA
chrI:102855-102920:-	10.2434	-0.141448	0.832912	0.908133
chrI:105292:-	0	NA	NA	NA
chrI:105956-106007:-	304.109	-0.662228	0.00353332	0.0241952
chrI:106366-106384:-	2.1025	0.0392409	0.980789	NA
chrI:106825:-	1.6437	2.10313	0.237632	NA
chrI:107098:-	0.320272	-2.07972	0.579747	NA
chrI:107328:-	0.295832	-1.01503	0.838733	NA
chrI:107561:-	3.08096	-3.99195	0.0239867	NA
chrI:108253:-	0.0756909	-1.01506	0.838727	NA
chrI:108547:-	0.438929	-0.869262	0.820567	NA
chrI:108586-108592:-	11.7342	-0.718195	0.290401	0.485046
chrI:108614-108718:-	2638.72	-0.338094	0.0697883	0.192271
chrI:109016:-	0.477738	0.378713	0.896383	NA
chrI:110400-110403:-	14.537	-0.735765	0.298537	0.493262
chrI:110434-110489:-	822.778	-0.141809	0.455301	0.641984
chrI:111059:-	0.0756909	-1.01506	0.838727	NA
chrI:111446-111474:-	3.04748	-0.80448	0.507376	NA
chrI:111510:-	0	NA	NA	NA
chrI:111878:-	3.07266	-2.08979	0.159671	NA
chrI:113371-113432:-	994.185	-0.0956996	0.607968	0.764061
chrI:113716:-	0.66286	0.372249	0.93038	NA
chrI:113740-113741:-	2.7463	-3.25322	0.0698841	NA
chrI:114571-114632:-	1404.6	0.492658	0.0116539	0.0563531
chrI:114656-114667:-	85.751	0.453824	0.139785	0.304495
chrI:118757:-	0.369212	-1.016	0.82795	NA
chrI:120139:-	3.32887	1.0941	0.35447	NA
chrI:127029-127038:-	2.51007	2.43538	0.253527	NA
chrI:127163-127171:-	3.40592	1.78911	0.145451	NA
chrI:127193-127207:-	10.3371	0.969756	0.169747	0.346225
chrI:127237-127245:-	1.75243	3.8845	0.0575688	NA
chrI:127295-127298:-	1.14684	-2.30038	0.311882	NA
chrI:127404:-	0	NA	NA	NA
chrI:127571-127575:-	58.2104	0.870752	0.0163552	0.0714048
chrI:127709:-	9.45481	-0.0408928	0.952177	0.975666
chrI:127731:-	2.78178	-0.163024	0.90123	NA
chrI:127757:-	4.16047	-0.572977	0.600064	NA
chrI:127927-127931:-	21.765	-0.499818	0.325432	0.520558
chrI:128075-128117:-	749.073	0.366623	0.0225196	0.090011
chrI:129019-129117:-	1636.84	0.252726	0.122662	0.278217
chrI:132002:-	1.44553	-0.715888	0.69847	NA
chrI:134625-134637:-	1.05144	0.0244028	0.990571	NA
chrI:134660-134696:-	5.52694	-0.312374	0.750038	NA
chrI:135672-135723:-	683.075	-0.30924	0.126169	0.283879
chrI:136640:-	8.09085	-0.995907	0.288854	0.483691
chrI:136671-136711:-	115.016	-0.211936	0.528272	0.70081
chrI:137317:-	6.73281	-0.456289	0.690937	NA
chrI:137485:-	2.74782	0.298285	0.837096	NA
chrI:137573:-	3.54524	-1.05668	0.435499	NA
chrI:137783:-	1.63489	1.47442	0.445386	NA
chrI:137855:-	0.284741	2.01971	0.684288	NA
chrI:138345:-	1.056	1.03046	0.650513	NA
chrI:138367-138478:-	2663.87	0.556244	0.00157186	0.0134504
chrI:138978:-	0.687198	-1.52141	0.613299	NA
chrI:139046:-	2.34602	0.680057	0.621081	NA
chrI:139523-139564:-	15.0298	0.209935	0.752209	0.859242
chrI:139601-139628:-	7.04286	0.423419	0.623516	NA
chrI:139653-139805:-	106.225	0.279248	0.3992	0.593482
chrI:140150-140170:-	16.3498	-0.367279	0.539273	0.709474
chrI:140192-140214:-	6.48792	-0.537171	0.580746	NA
chrI:140465-140467:-	2.13805	-1.26121	0.518755	NA
chrI:140648-140680:-	10.2012	-0.555728	0.456253	0.64265
chrI:141253:-	0.299949	-1.89209	0.698635	NA
chrI:141286-141331:-	7.51405	-1.42058	0.111914	0.262085
chrI:141427-141678:-	3338.5	0.0790571	0.682232	0.814301
chrI:141707-141711:-	22.9101	-0.0369009	0.942231	0.970447
chrI:141932:-	2.01401	-1.65625	0.281051	NA
chrI:142080:-	1.49641	-0.251992	0.880472	NA
chrI:146140:-	0	NA	NA	NA
chrI:146176-146222:-	0.931891	0.900641	0.680218	NA
chrI:147161-147165:-	8.06972	-0.686175	0.629597	0.779902
chrI:147199:-	3.49164	-0.652738	0.739945	NA
chrI:148076:-	0.395963	-2.60725	0.450023	NA
chrI:148317:-	0	NA	NA	NA
chrI:148682:-	0	NA	NA	NA
chrI:148705:-	0.220596	-1.01532	0.835497	NA
chrI:149084-149102:-	4.67701	0.56137	0.568702	NA
chrI:149145-149156:-	1.03617	-0.56513	0.773903	NA
chrI:149405:-	0	NA	NA	NA
chrI:149552:-	1.32195	0.428509	0.818889	NA
chrI:149780:-	0.149071	-1.01505	0.83873	NA
chrI:151161-151241:-	478.586	-0.130934	0.459882	0.645724
chrI:151322:-	2.59574	-0.39895	0.761097	NA
chrI:151964:-	2.54423	-3.82112	0.0567221	NA
chrI:151990-152018:-	48.9055	-1.3226	0.0120465	0.0576062
chrI:152043-152063:-	48.0659	-0.907979	0.0435482	0.141456
chrI:154182:-	0.168508	0.352204	0.943547	NA
chrI:154212-154232:-	79.2202	1.89562	4.81e-10	9.07e-08
chrI:154258:-	0.38261	0.423379	0.917603	NA
chrI:154397:-	0.768004	-0.162915	0.944465	NA
chrI:154418:-	0.149071	-1.01505	0.83873	NA
chrI:154456:-	0	NA	NA	NA
chrI:154498:-	0	NA	NA	NA
chrI:154661-154674:-	77.6065	-0.230145	0.453063	0.640614
chrI:154724-154808:-	3987.05	0.93992	2.58e-05	0.000637495
chrI:156894:-	0.665114	1.193	0.67214	NA
chrI:157326-157362:-	3.51887	-0.61551	0.587993	NA
chrI:157710:-	0.0756909	-1.01506	0.838727	NA
chrI:158637-158722:-	2102.28	0.139337	0.437186	0.627345
chrI:160157:-	0.240033	0.352428	0.940683	NA
chrI:161345-161346:-	43.9308	0.346077	0.363769	0.558417
chrI:167076:-	3.46198	-1.21425	0.524639	NA
chrI:167105-167133:-	18.8472	0.733429	0.151052	0.319323
chrI:167219:-	0.240033	0.352428	0.940683	NA
chrI:167265:-	0.313413	0.353549	0.927582	NA
chrI:167385:-	0.719896	-3.36806	0.200061	NA
chrI:167426:-	0.164342	1.73952	0.727058	NA
chrI:167726:-	0.144905	0.372269	0.940619	NA
chrI:168282:-	0.716235	-3.36779	0.224159	NA
chrI:168762:-	0.0756909	-1.01506	0.838727	NA
chrI:168877:-	6.48034	-0.500359	0.601181	NA
chrI:168911-168950:-	69.6151	-0.388996	0.210069	0.394754
chrI:168976-169061:-	1063.75	0.00988681	0.955993	0.977717
chrI:170532:-	19.453	1.71309	0.000967473	0.0093208
chrI:170726-170749:-	5.29862	0.122067	0.897022	NA
chrI:170798-170809:-	1.58738	0.743626	0.68714	NA
chrI:171693-171768:-	982.104	0.192724	0.306653	0.501321
chrI:172598-172620:-	2.12992	0.676436	0.66028	NA
chrI:174310:-	0.390959	-0.530715	0.89376	NA
chrI:175126-175189:-	316.892	-0.598194	0.00410457	0.0270241
chrI:179686-179696:-	4.29006	-1.26437	0.218418	NA
chrI:179725:-	2.65922	-2.22935	0.114552	NA
chrI:180018-180023:-	15.281	-1.6059	0.012468	0.05902
chrI:180051-180056:-	38.6285	-1.20386	0.00200214	0.016024
chrI:180079-180108:-	38.4445	-0.931903	0.0209346	0.085528
chrI:180285:-	2.01085	-0.742521	0.623759	NA
chrI:180818:-	4.21553	-0.20494	0.848552	NA
chrI:180996-181008:-	18.037	-1.17162	0.0410503	0.136008
chrI:182262:-	7.63923	1.99507	0.143531	0.309454
chrI:182404-182416:-	12.2927	-0.310734	0.627441	0.778348
chrI:182613-182616:-	10.4272	-1.56215	0.124241	0.280852
chrI:183341-183361:-	4.2812	0.448302	0.673977	NA
chrI:183545-183554:-	79.9513	0.512035	0.0968451	0.238232
chrI:184571-184593:-	41.8215	-1.44507	0.000503076	0.00580857
chrI:184659-184680:-	159.063	-0.82015	0.0304575	0.11063
chrI:188962-188983:-	14.3092	0.0780526	0.908354	0.952352
chrI:189049-189092:-	111.9	-0.749948	0.00387163	0.0258955
chrI:190047:-	31.2178	-0.39439	0.411326	0.604769
chrI:194500:-	0.307375	0.4263	0.92201	NA
chrI:194700-194703:-	0	NA	NA	NA
chrI:198045:-	1.30684	-3.36919	0.13413	NA
chrI:198197-198234:-	0.86044	0.434796	0.864624	NA
chrI:198269:-	0	NA	NA	NA
chrI:198319-198329:-	0.136174	2.01969	0.684292	NA
chrI:198738:-	0.0756909	-1.01506	0.838727	NA
chrI:198999-199014:-	8.30826	-1.53369	0.0578511	0.169668
chrI:200339:-	0.59904	0.408696	0.898567	NA
chrI:200362-200455:-	82.0844	-1.21756	0.00112059	0.0104226
chrI:200751:-	0.0996757	-1.21606	0.806891	NA
chrI:206797-206801:-	0.0756909	-1.01506	0.838727	NA
chrI:206998-207016:-	0.661517	1.26719	0.618312	NA
chrI:207053:-	0.175367	-2.08156	0.670483	NA
chrI:207318:-	0	NA	NA	NA
chrI:207659-207686:-	9.95623	-0.169738	0.796066	0.885738
chrI:208069-208093:-	49.1229	-0.246983	0.460467	0.646268
chrI:208620:-	1.26048	-0.761013	0.709758	NA
chrI:223022-223038:-	40.4831	-0.6795	0.0841912	0.217292
chrI:223164:-	20.9698	2.11286	0.000467194	0.00550269
chrI:227258-227270:-	53.5571	0.440744	0.217216	0.402696
chrII:162-172:+	22.2545	0.742513	0.256582	0.448736
chrII:8443-8452:+	3.39072	-2.6514	0.0435331	NA
chrII:8538-8558:+	2.36829	-2.12061	0.217863	NA
chrII:9572-9574:+	9.12937	-2.26152	0.0855797	0.219907
chrII:9754-9769:+	14.1583	0.717945	0.31373	0.509065
chrII:10705-10759:+	78.829	-0.751368	0.0224894	0.0899301
chrII:18141-18154:+	15.7911	-1.04802	0.2454	0.435744
chrII:19384:+	0.0756909	-1.01506	0.838727	NA
chrII:21485-21503:+	32.1412	0.022617	0.96283	0.980398
chrII:21535:+	6.60028	-0.327869	0.755701	NA
chrII:22805:+	0.296287	-1.89766	0.661856	NA
chrII:23963-24047:+	2724.91	0.508727	0.0043561	0.0282716
chrII:24069-24089:+	275.982	0.584412	0.0121905	0.0581083
chrII:24162:+	5.3041	0.302717	0.741749	NA
chrII:24424:+	0.411234	-0.703598	0.840617	NA
chrII:24496:+	2.23902	-0.430961	0.788038	NA
chrII:24535:+	0.900796	-1.0936	0.651893	NA
chrII:24654:+	1.03754	-0.0667988	0.976837	NA
chrII:24682:+	0.311558	0.352842	0.935547	NA
chrII:28353-28384:+	17.0329	0.18641	0.744858	0.85401
chrII:28416:+	0.523033	1.62998	0.61372	NA
chrII:28484:+	1.28532	-1.2692	0.511195	NA
chrII:28529:+	1.58663	-1.35435	0.46529	NA
chrII:28607:+	2.03508	-1.65088	0.415532	NA
chrII:29035-29053:+	9.60364	-2.67414	0.032136	0.114596
chrII:29448-29523:+	70.9557	-0.819479	0.00605373	0.0357151
chrII:29567-29585:+	28.6199	-0.280427	0.574883	0.738284
chrII:36387-36398:+	30.0329	-2.96007	0.00291791	0.0209974
chrII:36453:+	0.0996757	-1.21606	0.806891	NA
chrII:36672-36809:+	4929.61	0.284411	0.0888357	0.225275
chrII:36875-36883:+	10.7353	-0.570309	0.445226	0.634209
chrII:36906-36944:+	28.1623	0.0186862	0.96814	0.982951
chrII:36971-36973:+	3.96572	0.249821	0.806515	NA
chrII:37004-37039:+	28.4139	0.343179	0.426893	0.618676
chrII:37120:+	0.47813	-3.53728	0.372307	NA
chrII:37316:+	0	NA	NA	NA
chrII:37357:+	0.0996757	-1.21606	0.806891	NA
chrII:37548:+	0.171201	-1.21604	0.806893	NA
chrII:37812:+	4.21024	-3.46712	0.0108898	NA
chrII:38017:+	0.324438	-2.60546	0.525836	NA
chrII:38091:+	1.15485	-0.0749977	0.968028	NA
chrII:38314:+	0	NA	NA	NA
chrII:38449-38454:+	1.70187	-0.674784	0.699664	NA
chrII:38558:+	0.259015	2.56749	0.601325	NA
chrII:39094-39145:+	549.845	-0.0553197	0.775216	0.871938
chrII:40031-40047:+	16.4028	-0.987821	0.0809716	0.211823
chrII:40164-40179:+	17.1314	0.745675	0.154869	0.324928
chrII:40214:+	3.46302	0.7504	0.555093	NA
chrII:40356:+	0.0756909	-1.01506	0.838727	NA
chrII:40756-40813:+	687.189	0.243435	0.165175	0.339559
chrII:42273:+	0	NA	NA	NA
chrII:42506:+	0.811426	0.257404	0.915613	NA
chrII:42539:+	4.91792	0.0679601	0.952381	NA
chrII:43237-43321:+	501.59	-0.273817	0.137497	0.301392
chrII:45356:+	3.15363	-0.877576	0.477073	NA
chrII:45492-45626:+	8690.04	0.654823	0.0171865	0.0738357
chrII:45647-45671:+	105.298	-0.837762	0.002195	0.0170471
chrII:45978-46328:+	3139.59	0.885238	0.000108411	0.00190103
chrII:46570-46583:+	48.6736	-0.826512	0.0276516	0.103156
chrII:46604:+	3.45632	-0.571502	0.656175	NA
chrII:46774-46782:+	76.9989	-0.13373	0.653143	0.796145
chrII:46895:+	3.20074	-1.26136	0.323344	NA
chrII:48676:+	3.63893	-0.644712	0.580214	NA
chrII:48749-48842:+	1997.09	0.491035	0.00590335	0.0349914
chrII:48996:+	1.88215	-0.652523	0.671863	NA
chrII:49142-49176:+	34.4209	0.580765	0.22401	0.411433
chrII:49209-49215:+	9.06461	0.717084	0.361023	0.555433
chrII:49506-49510:+	25.1863	-0.316828	0.469836	0.654213
chrII:49532-49582:+	249.102	-0.536533	0.0315855	0.113397
chrII:54444:+	0	NA	NA	NA
chrII:55043-55052:+	0.0996757	-1.21606	0.806891	NA
chrII:56219:+	0	NA	NA	NA
chrII:59519-59528:+	87.3048	-0.0232626	0.950027	0.974498
chrII:61177-61193:+	12.074	-2.08207	0.09099	0.228548
chrII:63475-63483:+	19.5701	0.585646	0.271387	0.465058
chrII:63519:+	12.225	0.670363	0.275838	0.47015
chrII:63615-63617:+	6.73057	0.632305	0.450262	NA
chrII:63654-63694:+	417.163	-0.103667	0.608797	0.764644
chrII:63717-63763:+	263.887	-0.0745966	0.722626	0.840889
chrII:63794-63824:+	18.4637	-0.128977	0.805261	0.891483
chrII:65820:+	0	NA	NA	NA
chrII:65893:+	0.220596	-1.01532	0.835497	NA
chrII:66312:+	0.387249	-0.530634	0.894012	NA
chrII:66507-66530:+	5.63881	0.198432	0.823358	NA
chrII:66555-66635:+	19.381	0.767565	0.158039	0.329639
chrII:71537-71574:+	650.234	0.0540658	0.8096	0.894043
chrII:71595:+	28.5072	-0.0383036	0.938747	0.968924
chrII:72790-72791:+	0.593459	-3.43916	0.29688	NA
chrII:73506:+	0.0715251	0.372256	0.940621	NA
chrII:75153-75165:+	24.3576	-0.853573	0.0710553	0.19443
chrII:75186-75227:+	515.331	-0.735125	0.00235983	0.0179634
chrII:75536:+	0.885125	-3.4345	0.186486	NA
chrII:77557:+	0.147216	-1.01505	0.83873	NA
chrII:79063:+	0.0996757	-1.21606	0.806891	NA
chrII:79898:+	1.93835	-0.250663	0.874188	NA
chrII:84527-84563:+	125.172	-0.443908	0.33122	0.526531
chrII:88005-88064:+	304.654	-1.87314	2.32e-07	1.48e-05
chrII:88088-88109:+	4.58888	-1.11423	0.311183	NA
chrII:88148-88226:+	249.798	-1.83473	1.59e-09	2.42e-07
chrII:88261-88288:+	62.2338	-0.526729	0.315487	0.511124
chrII:89902:+	9.35504	1.04483	0.145086	0.311103
chrII:89926-90002:+	2317.76	0.303444	0.117469	0.270796
chrII:90313-90315:+	0.307375	0.4263	0.92201	NA
chrII:90622-90722:+	1840.59	-0.281999	0.0828931	0.214956
chrII:90847:+	0	NA	NA	NA
chrII:92336-92438:+	1778.93	0.309255	0.0337071	0.118423
chrII:93226:+	0.0996757	-1.21606	0.806891	NA
chrII:96270-96302:+	10.6339	1.27228	0.0755873	0.202343
chrII:96324-96421:+	41.0768	-0.382189	0.385131	0.579925
chrII:96454:+	0.352604	1.99239	0.631068	NA
chrII:97867-97882:+	0.192493	0.151194	0.975687	NA
chrII:98721:+	0.904748	0.355958	0.906111	NA
chrII:99133:+	0.209554	2.01972	0.684287	NA
chrII:100413:+	2.66934	-2.10249	0.259395	NA
chrII:101857-101886:+	379.966	-0.876145	0.000294254	0.00388401
chrII:107645-107681:+	72.9432	-0.733246	0.0195961	0.0815195
chrII:107712:+	16.5521	-1.01286	0.0742135	0.200003
chrII:107870-107932:+	331.739	-0.0594108	0.767627	0.867422
chrII:109069:+	0.136174	2.01969	0.684292	NA
chrII:109315:+	0.0756909	-1.01506	0.838727	NA
chrII:109447-109500:+	1.17467	-1.36093	0.537045	NA
chrII:109749:+	0.0733802	0.372257	0.940621	NA
chrII:110656-110732:+	1107.92	0.287893	0.149322	0.317102
chrII:110947:+	8.75526	0.508869	0.483763	0.665976
chrII:111383-111473:+	2627.22	0.438582	0.0138249	0.0634477
chrII:111640:+	0.296287	-1.89766	0.661856	NA
chrII:111853-111856:+	1.48167	1.35255	0.443499	NA
chrII:111984:+	0.173056	-1.21604	0.806893	NA
chrII:112070:+	18.2828	1.09136	0.0411065	0.136139
chrII:112426:+	1.46691	-0.716166	0.733753	NA
chrII:112497:+	0.682744	1.53376	0.574534	NA
chrII:112540-112549:+	2.54421	0.16569	0.901536	NA
chrII:112570-112576:+	2.794	1.93455	0.172756	NA
chrII:112680:+	0.627201	-3.7526	0.244909	NA
chrII:113615-113762:+	3337.51	0.263913	0.0952677	0.23572
chrII:113802:+	0.780519	-0.976716	0.721483	NA
chrII:113825:+	0.738551	-1.02105	0.782351	NA
chrII:114036-114050:+	2.11671	-0.351196	0.814884	NA
chrII:114140:+	1.03202	-1.03279	0.708824	NA
chrII:114455:+	0.241888	0.352439	0.940533	NA
chrII:114875:+	0	NA	NA	NA
chrII:114907:+	0.704193	-2.72061	0.407786	NA
chrII:115524:+	3.68949	-1.0916	0.632624	NA
chrII:115547:+	5.40976	-1.19618	0.394992	NA
chrII:117099-117113:+	32.8307	-0.0518516	0.905359	0.95061
chrII:117146-117154:+	8.2163	-0.278913	0.734324	0.847762
chrII:117176-117183:+	9.16175	0.275827	0.712409	0.834713
chrII:117238-117263:+	15.9884	0.525936	0.406058	0.599387
chrII:117378:+	27.1511	-0.733099	0.159319	0.33155
chrII:117410-117528:+	934.791	-0.326597	0.0612671	0.176322
chrII:117947:+	0	NA	NA	NA
chrII:118540:+	0.0733802	0.372257	0.940621	NA
chrII:118582:+	0.0756909	-1.01506	0.838727	NA
chrII:118812-118830:+	7.42629	0.351992	0.650113	0.794164
chrII:118892:+	0.361001	0.128997	0.973693	NA
chrII:119342-119354:+	1.04026	1.70186	0.499661	NA
chrII:119499:+	0.0996757	-1.21606	0.806891	NA
chrII:120274:+	0	NA	NA	NA
chrII:121728:+	1.2414	-0.435622	0.860186	NA
chrII:122299-122355:+	36.3663	0.27333	0.556457	0.723152
chrII:122728:+	0.424113	-3.08168	0.402067	NA
chrII:125025-125103:+	2051.34	0.41645	0.0111156	0.0544725
chrII:125271:+	3.47908	0.221401	0.850015	NA
chrII:125344:+	0.220596	-1.01532	0.835497	NA
chrII:125366:+	0.218741	-1.01503	0.838732	NA
chrII:125788:+	0.0733802	0.372257	0.940621	NA
chrII:125857:+	0.0928172	1.73951	0.727061	NA
chrII:125900:+	0.457814	1.74947	0.615489	NA
chrII:126594-126629:+	27.3502	-0.0876691	0.845042	0.916123
chrII:126671-126686:+	5.79998	-0.399871	0.647019	NA
chrII:126717:+	1.58274	0.000973321	0.99951	NA
chrII:127485:+	1.90902	0.233625	0.909851	NA
chrII:127536:+	2.11372	-1.91382	0.32742	NA
chrII:127718:+	0.813095	-3.15659	0.222915	NA
chrII:127751:+	5.37663	-1.54828	0.204616	NA
chrII:132396-132435:+	1677.58	0.223862	0.194679	0.376086
chrII:133414-133467:+	11.6809	0.00325333	0.996036	0.997935
chrII:136097:+	2.72865	-1.32512	0.386786	NA
chrII:136343-136359:+	7.35628	-0.977923	0.252707	NA
chrII:136555-136561:+	57.4746	-1.23315	0.000192955	0.00285981
chrII:137343:+	2.83466	-3.54408	0.047344	NA
chrII:137659-137660:+	69.1466	1.45378	0.000493413	0.00572942
chrII:137874-137882:+	1.22431	-2.44909	0.260124	NA
chrII:140924-140952:+	53.6994	-0.551011	0.248828	0.439784
chrII:140982-140991:+	45.3202	0.00319332	0.993374	0.99641
chrII:141021-141060:+	119.867	0.55386	0.0396522	0.132769
chrII:141082:+	16.9907	0.850641	0.172603	0.349747
chrII:141114:+	2.02011	1.65583	0.304591	NA
chrII:141156-141264:+	5580.01	0.497726	0.0108236	0.0534568
chrII:141524:+	10.2835	1.13996	0.13067	0.291213
chrII:141563:+	0.0756909	-1.01506	0.838727	NA
chrII:141605-141612:+	4.58627	-1.0811	0.29883	NA
chrII:141638-141654:+	3.54154	-0.95705	0.495822	NA
chrII:141778-141786:+	51.3319	1.18229	0.000854975	0.00859533
chrII:141840-141859:+	47.0623	1.1998	0.00828889	0.0447061
chrII:141882:+	1.2854	1.20306	0.529439	NA
chrII:141950-141951:+	47.6189	1.79736	5.52e-06	0.000194639
chrII:142175:+	6.52058	-1.06678	0.256583	NA
chrII:143082-143196:+	334.256	0.00769744	0.973202	0.985414
chrII:143262-143345:+	118.586	0.507257	0.0793886	0.208816
chrII:145894-145905:+	974.924	1.33809	1.78e-06	7.67e-05
chrII:146085-146144:+	2219.95	0.211082	0.180188	0.358605
chrII:146174:+	4.74154	0.881814	0.385265	NA
chrII:146518:+	0.214575	0.372276	0.940618	NA
chrII:147091-147129:+	358.156	-0.087956	0.661718	0.800473
chrII:147154-147178:+	23.7365	-0.0484487	0.917382	0.957352
chrII:147204:+	2.20426	-0.376577	0.800594	NA
chrII:148990-149060:+	2.91741	0.143896	0.908041	NA
chrII:149335:+	0.0756909	-1.01506	0.838727	NA
chrII:149791:+	0.0715251	0.372256	0.940621	NA
chrII:150023:+	0.365502	-1.01866	0.80222	NA
chrII:150055-150067:+	1.1091	-0.510684	0.830498	NA
chrII:150202:+	0.0733802	0.372257	0.940621	NA
chrII:151434:+	5.27239	-0.235499	0.816141	NA
chrII:151463-151499:+	100.497	-1.11347	0.00120695	0.0110197
chrII:153944:+	3.26665	0.314928	0.889176	NA
chrII:154454:+	0	NA	NA	NA
chrII:158666-158675:+	60.7649	-1.94605	0.000207641	0.00301146
chrII:160074-160165:+	3896.07	0.306961	0.0836548	0.216267
chrII:160228:+	8.45585	-0.447358	0.548956	0.717153
chrII:161233-161234:+	0.444854	-1.91377	0.577044	NA
chrII:161264-161265:+	2.88288	-4.69147	0.0132324	NA
chrII:161308:+	0.302764	-2.88251	0.552022	NA
chrII:161650-161724:+	916.708	0.0274173	0.905351	0.95061
chrII:162980:+	14.8219	-1.53862	0.0171538	0.0737545
chrII:164245:+	2.27803	-0.67187	0.643826	NA
chrII:164447-164480:+	115.733	-0.254561	0.416949	0.610016
chrII:164520-164539:+	6.08531	-1.61164	0.194567	NA
chrII:165540:+	1.11401	-1.13853	0.692464	NA
chrII:165682:+	13.6216	0.13401	0.84152	0.913511
chrII:165755:+	8.73191	0.131178	0.873066	0.932718
chrII:165958-165976:+	20.8646	-0.829205	0.201457	0.384534
chrII:166045-166127:+	869.082	-0.332694	0.0726919	0.197216
chrII:166968:+	4.42607	0.017516	0.987159	NA
chrII:166992-167003:+	15.972	0.13014	0.814068	0.897368
chrII:167028-167064:+	89.2194	0.203885	0.5305	0.702553
chrII:167085-167163:+	320.858	0.26531	0.326589	0.522103
chrII:168312-168427:+	3662.78	0.859544	0.00505409	0.0313033
chrII:168470-168515:+	367.499	-0.437748	0.0190882	0.079995
chrII:168809-169235:+	2591.4	0.910827	0.00197218	0.0158836
chrII:169310-169401:+	631.601	1.67472	3.5e-09	4.81e-07
chrII:169481-169499:+	10.1729	0.391277	0.656491	0.797383
chrII:169528-169560:+	16.6822	-0.950183	0.226179	0.414061
chrII:169586:+	2.00322	-3.01077	0.151921	NA
chrII:169609:+	2.90098	-0.655626	0.74352	NA
chrII:170098-170101:+	12.2145	-1.01148	0.263507	0.456773
chrII:170293:+	12.9143	-1.2236	0.0565888	0.167621
chrII:170326:+	5.06882	-1.63299	0.100009	NA
chrII:170348-170352:+	14.9897	-0.365733	0.522175	0.696473
chrII:170502-170625:+	4547.25	0.521493	0.010192	0.0512633
chrII:170803:+	6.33587	-0.731383	0.396479	NA
chrII:170877:+	5.91126	1.46451	0.108561	NA
chrII:171384-171484:+	1427.78	0.0769789	0.716043	0.836939
chrII:171622-171625:+	19.1222	-1.06185	0.0531309	0.160774
chrII:172443-172540:+	2922.11	0.216686	0.154228	0.323896
chrII:173304:+	0	NA	NA	NA
chrII:173486:+	0.738551	-1.02105	0.782351	NA
chrII:173837:+	0.144905	0.372269	0.940619	NA
chrII:174810:+	0.0733802	0.372257	0.940621	NA
chrII:181586:+	11.3436	0.0276899	0.967314	0.982829
chrII:182285-182357:+	865.794	-0.214544	0.185238	0.3645
chrII:183089:+	0.755452	0.356702	0.900652	NA
chrII:183127:+	0	NA	NA	NA
chrII:183793-183801:+	1.3483	1.02308	0.619571	NA
chrII:184271-184323:+	166.124	0.0101893	0.965794	0.982136
chrII:184353-184361:+	74.0109	-0.124582	0.676284	0.810197
chrII:184400:+	6.32341	0.36571	0.679944	NA
chrII:184525:+	10.331	-0.069285	0.926724	0.962205
chrII:184704:+	4.46027	-0.303432	0.765876	NA
chrII:184734:+	5.36939	-0.17356	0.865772	NA
chrII:185091:+	1.45056	-1.89135	0.312035	NA
chrII:185119:+	1.21555	-1.8653	0.394717	NA
chrII:185243:+	0.148567	0.372254	0.940621	NA
chrII:189673:+	0.297638	-1.01707	0.817216	NA
chrII:189736:+	0	NA	NA	NA
chrII:191912-191950:+	40.122	-0.850355	0.10466	0.250899
chrII:191973-191985:+	52.2738	-1.59572	0.000177493	0.00267659
chrII:192023-192043:+	9.05784	-4.14806	0.00710443	0.039905
chrII:192315-192331:+	6.47599	-0.405508	0.685273	NA
chrII:192354-192378:+	515.747	0.113683	0.507436	0.685905
chrII:192404-192456:+	1246.65	0.294708	0.0554013	0.165209
chrII:193953:+	102.615	-0.761702	0.0100375	0.0507816
chrII:194016-194045:+	823.684	-0.107909	0.549878	0.718044
chrII:194119:+	2.17273	2.04512	0.170192	NA
chrII:196287-196308:+	53.9798	0.496373	0.186645	0.366128
chrII:196330-196337:+	41.2486	-0.131137	0.744444	0.853956
chrII:196695-196701:+	11.4354	-0.0382548	0.955025	0.977181
chrII:197485:+	1.25194	-1.94948	0.447422	NA
chrII:198921:+	0.707048	-1.51682	0.601771	NA
chrII:201978-201993:+	124.509	-0.329489	0.190864	0.371647
chrII:202022-202045:+	67.7279	-0.629416	0.0431911	0.14063
chrII:202602-202612:+	76.3073	-0.949907	0.00192642	0.0156006
chrII:202814:+	0.0928172	1.73951	0.727061	NA
chrII:203356:+	7.90022	-0.0464637	0.956148	0.977717
chrII:203428-203508:+	1241.12	-0.232385	0.209774	0.394549
chrII:203585-203595:+	12.191	-0.243862	0.739597	0.851309
chrII:203619:+	7.67755	-0.683819	0.420629	0.613019
chrII:203687:+	0.765517	-1.16484	0.72738	NA
chrII:204064-204076:+	2.76569	-5.33714	0.00450226	NA
chrII:204431:+	0	NA	NA	NA
chrII:205479:+	0.0733802	0.372257	0.940621	NA
chrII:205548-205549:+	0.593003	-3.16422	0.297214	NA
chrII:205573:+	0.495639	-3.08071	0.330099	NA
chrII:205599-205603:+	1.2834	-4.23118	0.0641036	NA
chrII:205626-205635:+	2.3873	-2.96353	0.119372	NA
chrII:205678:+	16.0689	1.23945	0.0387575	0.13081
chrII:205700-205800:+	125.848	1.23579	1.66e-05	0.000454165
chrII:205831:+	0	NA	NA	NA
chrII:206050:+	0.898141	-1.21433	0.595565	NA
chrII:207100-207174:+	681.56	-0.353165	0.0377219	0.128243
chrII:207219:+	7.84517	-0.430286	0.577722	0.74006
chrII:208831:+	9.68621	0.417667	0.560793	0.7266
chrII:209040:+	0	NA	NA	NA
chrII:209073:+	0.285245	0.615888	0.890262	NA
chrII:209171-209184:+	8.35821	0.544495	0.547999	0.716473
chrII:209218-209232:+	16.7093	0.0026123	0.997085	0.998419
chrII:209525-209621:+	292.669	-0.22824	0.233393	0.422424
chrII:210598-210625:+	3.16882	0.249763	0.842396	NA
chrII:210650:+	1.32916	-1.03676	0.689691	NA
chrII:210740:+	0.0996757	-1.21606	0.806891	NA
chrII:211666:+	0.0756909	-1.01506	0.838727	NA
chrII:215004:+	0.0715251	0.372256	0.940621	NA
chrII:216669:+	2.27047	-0.617388	0.701144	NA
chrII:216824:+	3.54957	-0.453663	0.706154	NA
chrII:217351:+	5.7859	-0.439817	0.634528	NA
chrII:217388-217433:+	205.03	-0.455465	0.0530899	0.16071
chrII:217469-217478:+	7.97943	0.123486	0.877648	0.934844
chrII:217533-217545:+	35.6416	-1.18703	0.00616522	0.036126
chrII:218794:+	0	NA	NA	NA
chrII:219001:+	0	NA	NA	NA
chrII:219033:+	0.175367	-2.08156	0.670483	NA
chrII:220885-220948:+	59.3597	0.0763198	0.804436	0.891
chrII:220971-220993:+	21.6771	0.986817	0.0591583	0.1724
chrII:221340:+	1.51831	-2.50608	0.220134	NA
chrII:224776:+	0.14676	0.372269	0.940619	NA
chrII:225319:+	0.175367	-2.08156	0.670483	NA
chrII:225509-225518:+	1.29869	-1.5042	0.457998	NA
chrII:227064-227066:+	10.1624	-3.1399	0.0482431	0.15171
chrII:227511-227592:+	258.779	-0.886899	0.00012057	0.00204781
chrII:227620:+	1.7482	-0.740214	0.649364	NA
chrII:228820:+	0	NA	NA	NA
chrII:232260:+	0.244581	-1.21078	0.797494	NA
chrII:232871:+	0	NA	NA	NA
chrII:233004:+	0.0996757	-1.21606	0.806891	NA
chrII:233830:+	0.221947	0.372272	0.940618	NA
chrII:233946:+	0.21643	0.372276	0.940618	NA
chrII:234181:+	1.13699	-2.61431	0.285091	NA
chrII:234239:+	0.782756	-1.61025	0.53099	NA
chrII:234270:+	0	NA	NA	NA
chrII:234323-234350:+	2.96536	-0.740511	0.597591	NA
chrII:234560:+	0.0715251	0.372256	0.940621	NA
chrII:234600:+	1.58826	-0.860037	0.681187	NA
chrII:234784:+	9.48098	0.834047	0.275588	0.47007
chrII:234857:+	0.136174	2.01969	0.684292	NA
chrII:234935-234977:+	28.2523	0.966018	0.0766125	0.203923
chrII:235027-235035:+	8.37474	1.02403	0.254402	0.446653
chrII:235073:+	3.49627	1.6174	0.207725	NA
chrII:236037-236054:+	83.9571	-0.348933	0.221597	0.408419
chrII:236242-236614:+	13182.9	0.527561	0.0526968	0.159933
chrII:236641-236868:+	272.831	0.518201	0.0677414	0.188795
chrII:236921:+	0.92945	-1.85147	0.426757	NA
chrII:236961-236963:+	17.7464	2.30632	0.000363992	0.00457275
chrII:237000-237002:+	7.06963	2.28064	0.0260375	NA
chrII:237234:+	9.34347	-1.52092	0.0775362	0.205581
chrII:237668-237677:+	5.77132	0.926325	0.54579	NA
chrII:237737:+	0.738879	-2.49079	0.437809	NA
chrII:238450:+	7.27849	-1.19785	0.162391	NA
chrII:238475-238533:+	291.596	-1.22843	3.68e-06	0.000139492
chrII:240738:+	2.83863	0.0341372	0.976994	NA
chrII:241664-241674:+	21.2952	-1.36022	0.0166743	0.0723081
chrII:242768-242798:+	817.68	-0.0666389	0.697314	0.825573
chrII:242953:+	0	NA	NA	NA
chrII:243282:+	1.2979	-0.673689	0.77016	NA
chrII:243664:+	0.572884	0.880821	0.794517	NA
chrII:244082-244116:+	7.77437	-0.0652012	0.933062	0.965771
chrII:245315:+	2.85575	-2.96771	0.0444035	NA
chrII:245813-245901:+	999.163	0.0243289	0.892437	0.943381
chrII:245930-245960:+	22.1019	-0.46819	0.356859	0.551369
chrII:246830:+	1.18755	-0.942863	0.613496	NA
chrII:246859-246907:+	214.275	-0.135325	0.54681	0.715945
chrII:246953-246970:+	94.4611	-1.0625	0.000229272	0.00323724
chrII:247565-247581:+	43.1729	0.944687	0.0140127	0.064023
chrII:247678:+	3.34972	-1.60322	0.233507	NA
chrII:247792:+	2.25269	-0.450067	0.812295	NA
chrII:248019-248092:+	161.244	0.0498151	0.826354	0.90416
chrII:248173:+	2.492	0.403207	0.751474	NA
chrII:248739-248741:+	12.5896	-0.044626	0.95497	0.977181
chrII:248787-248791:+	9.69026	-0.618796	0.393657	0.587884
chrII:249379:+	0.248243	-1.21604	0.806893	NA
chrII:251162:+	1.27619	-0.525323	0.781249	NA
chrII:251535:+	1.13058	-3.30317	0.173868	NA
chrII:251686:+	8.1822	-0.746447	0.356904	0.551386
chrII:251717:+	37.9006	-0.787386	0.0577233	0.169513
chrII:251754-251764:+	19.0953	0.251547	0.634053	0.783606
chrII:252814:+	0.635492	-1.22668	0.662473	NA
chrII:252839-252854:+	1.59364	-0.57692	0.725034	NA
chrII:252876:+	0.349977	3.14631	0.492869	NA
chrII:252904:+	0.185634	2.56747	0.601327	NA
chrII:254612-254627:+	27.1684	-0.897518	0.0513578	0.157589
chrII:254661:+	13.3204	0.0773069	0.902387	0.949059
chrII:254693:+	5.066	0.190818	0.864792	NA
chrII:254776:+	2.43074	2.80919	0.183839	NA
chrII:255084-255088:+	13.4519	0.220038	0.719061	0.838943
chrII:255183-255200:+	45.204	-0.43111	0.342696	0.537175
chrII:255279:+	5.19741	-3.01567	0.0254418	NA
chrII:256127:+	4.47132	-1.149	0.376268	NA
chrII:256213-256222:+	12.0795	-0.0935956	0.889522	0.941159
chrII:256264-256389:+	6380.18	-0.12945	0.603175	0.760142
chrII:256436-256461:+	32.456	0.28858	0.55639	0.723122
chrII:256505-256518:+	8.11964	-0.570846	0.470196	0.654548
chrII:256581-256673:+	44.5487	-0.226594	0.605773	0.762421
chrII:256695-256741:+	74.6934	1.53391	5.16e-05	0.00108462
chrII:256989-257005:+	18.4241	-0.696398	0.25365	0.445668
chrII:258253-258264:+	76.6594	-0.581102	0.101493	0.246622
chrII:258288:+	4.31065	-0.77145	0.572461	NA
chrII:263199:+	1.14864	-3.07753	0.204674	NA
chrII:266139:+	0.950815	0.372246	0.907509	NA
chrII:266167:+	3.24303	-3.12332	0.105933	NA
chrII:266193:+	0.862491	-3.0781	0.220096	NA
chrII:266368:+	11.443	-5.02717	0.00198874	0.0159712
chrII:266574:+	2.74128	-0.945144	0.597906	NA
chrII:269781:+	21.8453	-1.01367	0.0415444	0.137036
chrII:270189-270267:+	5143.06	0.538525	0.0247497	0.0959519
chrII:270377-270398:+	134.052	0.0549415	0.829771	0.906306
chrII:270476-270478:+	10.6631	-0.297821	0.670392	0.805973
chrII:270966:+	0.471699	0.442514	0.913312	NA
chrII:273997-274036:+	13.2769	-0.222821	0.740198	0.851703
chrII:276738-276744:+	27.1329	-0.67896	0.114656	0.26668
chrII:276775-276820:+	65.9251	-0.651253	0.057132	0.168469
chrII:279833:+	0.0996757	-1.21606	0.806891	NA
chrII:281307:+	83.8327	-0.225159	0.44069	0.630265
chrII:281328-281393:+	290.128	-0.357459	0.138034	0.302165
chrII:282595:+	0.348422	-2.72521	0.496643	NA
chrII:282760:+	0.285245	0.615888	0.890262	NA
chrII:282982:+	0.192493	0.151194	0.975687	NA
chrII:283137:+	0.136174	2.01969	0.684292	NA
chrII:283161-283213:+	5.54683	-0.484606	0.591379	NA
chrII:283630:+	3.13346	0.0111775	0.992509	NA
chrII:283651-283743:+	609.631	0.174514	0.346848	0.540995
chrII:283768:+	1.72929	-1.33572	0.45099	NA
chrII:284071-284079:+	13.6328	-1.19265	0.0579722	0.169848
chrII:284211:+	0	NA	NA	NA
chrII:288267:+	12.5291	-1.05845	0.108195	0.256226
chrII:288322:+	4.30065	-0.892551	0.447166	NA
chrII:289292-289390:+	967.041	0.635532	0.00504776	0.0312996
chrII:289413:+	3.91183	-1.42695	0.210207	NA
chrII:290222:+	3.50239	0.122566	0.912804	NA
chrII:290248:+	0.887117	-1.02641	0.744864	NA
chrII:290440:+	6.2472	-0.811393	0.3849	NA
chrII:292263-292272:+	40.8789	-1.14497	0.0238017	0.0934323
chrII:292295-292319:+	38.5168	-1.48818	0.0165257	0.0718539
chrII:292340-292347:+	13.0661	-1.16143	0.182944	0.361939
chrII:292441-292512:+	151.447	-1.425	4.87e-08	4.16e-06
chrII:292541:+	0.144905	0.372269	0.940619	NA
chrII:294225:+	2.38167	-4.12325	0.0411226	NA
chrII:296224-296228:+	25.6539	1.17888	0.0153278	0.0681895
chrII:296249:+	0.649738	1.93609	0.541484	NA
chrII:296278-296286:+	30.0758	-0.256019	0.623254	0.775264
chrII:297978:+	8.52091	-0.210272	0.780691	0.876115
chrII:298002-298021:+	127.001	-0.0711736	0.775415	0.871983
chrII:298057-298081:+	33.8688	-0.236532	0.556786	0.723235
chrII:298203-298268:+	223.973	-0.183343	0.42778	0.619497
chrII:298533:+	0.0928172	1.73951	0.727061	NA
chrII:299469-299511:+	14.491	-0.575485	0.406876	0.600109
chrII:300034-300036:+	65.073	1.22739	0.000966895	0.0093208
chrII:300084-300164:+	8297.23	0.553236	0.055024	0.164538
chrII:300240-300259:+	9.04395	-0.282454	0.717446	0.837863
chrII:300523-300558:+	21.1611	-0.0548133	0.92257	0.959836
chrII:300942-301043:+	373.289	0.552722	0.0597148	0.173713
chrII:301092-301134:+	152.384	1.56932	2.24e-08	2.2e-06
chrII:301200:+	0.224762	-1.89191	0.699833	NA
chrII:301820-301823:+	5.20954	-0.781385	0.451371	NA
chrII:303853-303880:+	22.8684	-0.360008	0.422803	0.615074
chrII:303974:+	1.19237	0.21218	0.930026	NA
chrII:303996-304002:+	5.3671	-0.857555	0.37578	NA
chrII:304224:+	0.790833	2.93662	0.274671	NA
chrII:304421:+	1.75015	-2.05901	0.221323	NA
chrII:304460-304470:+	2.72207	-1.03565	0.440574	NA
chrII:306241-306287:+	219.113	-1.7694	3.98e-10	7.97e-08
chrII:307515-307628:+	698.62	-1.42088	6.38e-13	2.62e-10
chrII:307670-307714:+	29.3651	-1.47216	0.00626528	0.0365167
chrII:307757:+	2.4327	0.167792	0.93002	NA
chrII:307788:+	0.519194	-2.89286	0.41436	NA
chrII:307868:+	0.293521	0.372282	0.940617	NA
chrII:308173-308192:+	14.4809	-1.45103	0.0203642	0.0838433
chrII:308430:+	0.291666	0.372281	0.940617	NA
chrII:308585:+	0.0756909	-1.01506	0.838727	NA
chrII:310551-310561:+	13.6544	-0.682386	0.567919	0.732709
chrII:310583-310588:+	84.354	-1.80881	0.000108096	0.00189965
chrII:311797-311819:+	30.2582	-0.319413	0.443492	0.632563
chrII:311842-311880:+	541.452	-0.396457	0.0453353	0.145594
chrII:312929:+	0.637851	-1.61121	0.556349	NA
chrII:313140:+	0.609243	-0.479503	0.868643	NA
chrII:313203:+	0.207699	2.01972	0.684287	NA
chrII:314742:+	0	NA	NA	NA
chrII:315479-315552:+	2184.52	0.492252	0.00202395	0.0161199
chrII:315713-315724:+	5.68269	0.349174	0.724723	NA
chrII:315762:+	0.0928172	1.73951	0.727061	NA
chrII:315906:+	0.175367	-2.08156	0.670483	NA
chrII:316081:+	0.199351	-2.25274	0.644369	NA
chrII:316614:+	1.13682	-3.29939	0.208194	NA
chrII:316786-316806:+	17.5883	0.898534	0.109396	0.258069
chrII:316902-316938:+	334.848	0.948616	3.5e-05	0.000793712
chrII:317174:+	1.39801	-1.71765	0.403297	NA
chrII:318177-318253:+	1128.94	-0.354434	0.060096	0.174358
chrII:319301:+	0.0733802	0.372257	0.940621	NA
chrII:319333-319356:+	1.49779	-0.117761	0.945075	NA
chrII:319407:+	0.323933	-2.08056	0.616579	NA
chrII:319729-319744:+	2.05284	-1.10024	0.467808	NA
chrII:321243:+	0.487307	-2.23868	0.541599	NA
chrII:321779:+	2.35496	-0.589797	0.778735	NA
chrII:321802-321836:+	105.566	-1.8248	0.000219942	0.00314336
chrII:323143:+	0.293976	-1.01703	0.817565	NA
chrII:324268:+	2.34715	-0.0895739	0.954829	NA
chrII:324410:+	2.54212	-1.70953	0.29591	NA
chrII:324516:+	3.28011	-0.814849	0.56707	NA
chrII:325512:+	4.75818	-3.02449	0.104066	NA
chrII:325713:+	1.00526	-2.2238	0.470864	NA
chrII:326258-326338:+	123.135	-2.54685	1.59e-08	1.64e-06
chrII:327879-327893:+	6.66414	-1.60809	0.0895907	NA
chrII:328278:+	1.41678	-2.90126	0.184959	NA
chrII:331734-331832:+	641.324	0.107513	0.537103	0.707899
chrII:331956-332003:+	31.8419	0.224666	0.617858	0.771122
chrII:332027-332037:+	2.75389	0.437567	0.72489	NA
chrII:332081:+	4.18551	-0.767937	0.479771	NA
chrII:332661-332687:+	45.5945	0.394151	0.269878	0.463605
chrII:332733-332845:+	14132.5	0.544132	0.0833484	0.215796
chrII:332871-332905:+	169.051	-0.757582	0.000831525	0.0084163
chrII:332984:+	1.60841	-1.09869	0.503453	NA
chrII:333385:+	81.8689	-0.367718	0.219619	0.406018
chrII:333412:+	4.78261	-3.21618	0.0199017	NA
chrII:333455:+	0.829057	1.75188	0.595045	NA
chrII:333477-333491:+	9.92786	-0.396055	0.605941	0.762574
chrII:333570-333758:+	463.103	1.03576	3.23e-05	0.000748246
chrII:333835-333869:+	84.8276	1.95349	1.04e-07	7.83e-06
chrII:333904-333905:+	6.7044	0.0299104	0.973735	NA
chrII:334177-334202:+	55.3539	0.334682	0.413791	0.607143
chrII:334428:+	4.31549	-0.429502	0.696807	NA
chrII:336519:+	2.19138	1.288	0.477438	NA
chrII:337193-337222:+	90.0773	-1.66521	4.2e-06	0.000155344
chrII:337252-337264:+	5.54515	-2.13943	0.126133	NA
chrII:338648-338664:+	13.3903	-0.796376	0.409174	0.602361
chrII:339532-339546:+	6.48446	-1.86786	0.089452	NA
chrII:339570-339611:+	57.4278	-2.0806	1.71e-05	0.000463979
chrII:340959-341006:+	66.5884	-1.70785	1.48e-05	0.000415016
chrII:341031:+	0.781845	-0.695785	0.817392	NA
chrII:341441-341473:+	178.881	-1.1698	1.16e-06	5.38e-05
chrII:341884:+	0.14305	0.372269	0.940619	NA
chrII:341982-342072:+	129.508	-1.4503	0.00108591	0.0101692
chrII:342493-342612:+	240.85	-1.21387	2.92e-05	0.000694525
chrII:342634-342672:+	71.8736	-1.2279	0.000586292	0.00652597
chrII:342720:+	6.89311	-0.445711	0.620081	NA
chrII:342745-342818:+	929.581	-0.624725	0.00141441	0.0124169
chrII:342841:+	7.14879	-0.19016	0.820958	NA
chrII:344065:+	0.151382	-1.89193	0.69983	NA
chrII:344200:+	2.12746	-5.08054	0.0105876	NA
chrII:344260-344270:+	17.9665	-0.54015	0.36826	0.563308
chrII:344295-344315:+	15.0548	0.0482117	0.936299	0.967737
chrII:344433-344434:+	1.791	-3.31194	0.122768	NA
chrII:346691:+	2.93704	0.361498	0.872188	NA
chrII:346859:+	6.24984	-2.13893	0.207371	NA
chrII:347084:+	1.17259	-1.03355	0.704957	NA
chrII:347239:+	9.84644	-2.63293	0.140531	0.305644
chrII:347300:+	2.8386	-1.04466	0.656806	NA
chrII:347430-347447:+	3.69382	-0.597866	0.766941	NA
chrII:347591-347592:+	48.144	-0.587736	0.432639	0.623699
chrII:347772-347906:+	1420.32	0.0171526	0.932222	0.965469
chrII:347937:+	2.11584	-2.51157	0.243197	NA
chrII:348161:+	1.71717	-1.59917	0.358545	NA
chrII:348377:+	2.92729	1.1128	0.466007	NA
chrII:348509:+	0.0715251	0.372256	0.940621	NA
chrII:348722:+	0.0733802	0.372257	0.940621	NA
chrII:348921-348935:+	1.70995	-0.357265	0.838183	NA
chrII:348956-348960:+	0.748576	1.42352	0.60761	NA
chrII:349112:+	0.0756909	-1.01506	0.838727	NA
chrII:349137-349178:+	32.5499	1.92968	1.45e-05	0.000408932
chrII:349229:+	0	NA	NA	NA
chrII:350015-350034:+	15.3602	-2.25714	0.00239481	0.0181782
chrII:350073:+	2.87816	-0.519196	0.682622	NA
chrII:350149-350184:+	40.3497	-0.964392	0.0181075	0.0767673
chrII:350816-350828:+	33.7237	-4.67772	8.84e-07	4.34e-05
chrII:351058-351078:+	52.0376	-0.925873	0.0133217	0.0618301
chrII:351109-351163:+	37.6244	-0.453293	0.235945	0.425401
chrII:351211-351262:+	225.747	-0.625321	0.0268219	0.101118
chrII:351354-351360:+	0.0733802	0.372257	0.940621	NA
chrII:351411:+	0.136174	2.01969	0.684292	NA
chrII:351604-351649:+	54.4015	-1.17381	0.002314	0.0176914
chrII:351677-351683:+	5.61563	-1.15227	0.26834	NA
chrII:351913:+	1.44912	0.907973	0.636367	NA
chrII:352184:+	2.29714	-2.07086	0.369863	NA
chrII:352215:+	2.88729	-0.189937	0.91048	NA
chrII:353520-353560:+	2.75049	-1.54432	0.308275	NA
chrII:353588:+	3.10349	-0.594386	0.772134	NA
chrII:353804:+	0.417255	-1.23124	0.715549	NA
chrII:356194:+	27.6193	-0.682733	0.273122	0.466928
chrII:356254-356259:+	17.2488	0.415194	0.476925	0.660123
chrII:356826-356834:+	2.64925	0.936912	0.501928	NA
chrII:360229:+	1.59677	-0.283901	0.870633	NA
chrII:360603-360654:+	59.7272	-1.07204	0.0338797	0.118851
chrII:360705:+	4.25357	2.8061	0.169277	NA
chrII:362806-362899:+	902.796	-1.10227	7.67e-09	8.99e-07
chrII:362942-362950:+	2.95076	-5.75417	0.00249903	NA
chrII:364245:+	1.04114	-1.42234	0.588869	NA
chrII:364308:+	0	NA	NA	NA
chrII:364347-364383:+	0.895401	-0.776345	0.748762	NA
chrII:365876-365931:+	237.158	-0.614856	0.040185	0.134062
chrII:365975:+	1.18281	-3.66446	0.129821	NA
chrII:366008:+	1.00142	-2.71054	0.294705	NA
chrII:366772-366800:+	16.1012	-0.0582233	0.920594	0.959158
chrII:369956:+	74.8253	-0.460255	0.281993	0.476288
chrII:369979-370039:+	164.244	-0.170256	0.589548	0.749532
chrII:370514-370589:+	343.246	0.5315	0.016254	0.0710896
chrII:371283:+	4.77518	1.13489	0.254285	NA
chrII:371329:+	2.81739	0.0260969	0.985903	NA
chrII:371378-371395:+	8.54738	-1.17786	0.174131	0.351411
chrII:371429-371440:+	24.8129	-0.0287411	0.958843	0.978525
chrII:371529-371537:+	7.29431	0.0788644	0.932911	NA
chrII:371576:+	6.58264	-0.142957	0.903681	NA
chrII:371855:+	10.0689	0.405639	0.588369	0.748498
chrII:371878-371882:+	23.2389	-1.0326	0.0337466	0.11851
chrII:371929-371957:+	48.917	-0.473682	0.171486	0.348214
chrII:372028:+	5.11199	-0.598075	0.533903	NA
chrII:372063-372069:+	7.24194	-0.748078	0.421089	NA
chrII:372113:+	13.5818	-0.0637984	0.933614	0.966057
chrII:373484-373523:+	56.6375	-1.33966	0.00100373	0.00958013
chrII:373762-373792:+	28.3028	-2.59234	0.00255013	0.0190107
chrII:375916:+	7.19499	-1.21181	0.156627	NA
chrII:376361-376432:+	142.971	-1.23168	0.00230874	0.0176677
chrII:376455-376459:+	24.322	-0.953669	0.242326	0.433004
chrII:376485-376529:+	97.8936	-1.22444	5.35e-05	0.0011174
chrII:378773:+	4.61656	-3.69306	0.040842	NA
chrII:379086:+	2.98029	-3.17122	0.0724937	NA
chrII:379127-379179:+	86.0585	-1.34203	0.000768995	0.00795342
chrII:379227:+	10.3703	0.104284	0.916172	0.957063
chrII:380197-380225:+	28.3271	-0.042804	0.919514	0.958564
chrII:380257:+	15.7133	0.590007	0.296548	0.491362
chrII:380284-380300:+	154.737	0.0409095	0.854992	0.922083
chrII:380328-380474:+	2866.53	0.212961	0.286085	0.480724
chrII:381274:+	1.65739	2.67263	0.251509	NA
chrII:381329-381354:+	61.3664	-1.82624	0.00735681	0.0409025
chrII:381714-381718:+	2.13042	-2.71492	0.176179	NA
chrII:381808:+	8.20085	1.02692	0.211457	0.396637
chrII:381848:+	45.659	0.580855	0.122819	0.278519
chrII:381879-382005:+	815.681	0.437838	0.0168208	0.0727025
chrII:382312:+	0	NA	NA	NA
chrII:383086-383096:+	35.0144	-0.359611	0.355323	0.549877
chrII:383120-383180:+	1753.32	-0.249215	0.143815	0.309776
chrII:384002:+	0.151382	-1.89193	0.69983	NA
chrII:384405:+	0	NA	NA	NA
chrII:384625-384636:+	0.512318	-1.29014	0.717159	NA
chrII:384671-384682:+	1.20276	-0.5848	0.777518	NA
chrII:384753:+	0.136174	2.01969	0.684292	NA
chrII:385012-385013:+	0.874093	-4.14874	0.114117	NA
chrII:385291:+	0.149071	-1.01505	0.83873	NA
chrII:385510:+	0.192493	0.151194	0.975687	NA
chrII:385577:+	0.447165	-2.48116	0.507124	NA
chrII:386228-386326:+	532.134	-0.507644	0.00771326	0.0424669
chrII:387674:+	0	NA	NA	NA
chrII:388108:+	0.0715251	0.372256	0.940621	NA
chrII:388866-388876:+	0.884239	-1.97644	0.40119	NA
chrII:388925-388936:+	1.13009	2.09591	0.29532	NA
chrII:389362:+	0.852808	-2.71306	0.316468	NA
chrII:390801-390805:+	4.95025	0.527428	0.574692	NA
chrII:391002:+	9.6468	-1.1289	0.181448	0.360195
chrII:391827:+	1.69415	-1.04023	0.674489	NA
chrII:391877:+	2.12459	-3.24952	0.139571	NA
chrII:391911-391922:+	10.8714	-0.555249	0.602482	0.75956
chrII:392138-392139:+	7.18015	-0.251729	0.776343	NA
chrII:392805-392821:+	46.4489	0.269227	0.639531	0.787525
chrII:392859-393115:+	4935.12	0.257519	0.320651	0.51613
chrII:393136-393145:+	10.196	-1.49377	0.0620015	0.177749
chrII:393181:+	0.218741	-1.01503	0.838732	NA
chrII:393231-393232:+	1.89163	-4.52396	0.0281984	NA
chrII:393461-393522:+	103.993	-0.0308125	0.907651	0.95192
chrII:393592-393593:+	1.58833	-0.757552	0.692545	NA
chrII:393620-393622:+	2.21109	0.00590358	0.996819	NA
chrII:393663-393841:+	139.148	-0.580186	0.0595772	0.173436
chrII:393870-393921:+	19.8269	-0.593146	0.243268	0.433834
chrII:393947-393961:+	14.6746	0.480798	0.420635	0.613019
chrII:394002-394022:+	11.4776	-0.382281	0.553799	0.720783
chrII:394048-394067:+	4.49849	-2.44711	0.0346967	NA
chrII:394092:+	0.0715251	0.372256	0.940621	NA
chrII:394123-394138:+	9.69687	-1.36541	0.0734244	0.19862
chrII:394174-394204:+	26.0231	0.146968	0.744063	0.853635
chrII:394265:+	0.0733802	0.372257	0.940621	NA
chrII:394321-394330:+	2.51028	-1.91688	0.172631	NA
chrII:394357-394555:+	162.681	-0.125744	0.678321	0.81164
chrII:394579-394592:+	4.0509	-0.380804	0.742091	NA
chrII:394624-394636:+	5.97157	-0.731598	0.455224	NA
chrII:394660-394716:+	14.0087	-0.247887	0.702815	0.829098
chrII:394746:+	0.37564	-2.47349	0.579764	NA
chrII:394824:+	0.834436	-1.77982	0.533397	NA
chrII:394853:+	0.66095	-0.751148	0.787878	NA
chrII:394900:+	3.78677	0.825847	0.449613	NA
chrII:395028-395032:+	2.21386	1.58542	0.26292	NA
chrII:395116-395117:+	0.0715251	0.372256	0.940621	NA
chrII:395180:+	0.563511	-0.694907	0.815055	NA
chrII:398528-398530:+	6.27036	-0.196395	0.852225	NA
chrII:399721:+	0.815927	-0.539337	0.838993	NA
chrII:401038:+	1.88744	-0.633451	0.728874	NA
chrII:401119-401156:+	46.6464	-0.0503303	0.916968	0.957102
chrII:403461:+	0.0715251	0.372256	0.940621	NA
chrII:403489-403491:+	0.218741	-1.01503	0.838732	NA
chrII:403518:+	0	NA	NA	NA
chrII:403569:+	0	NA	NA	NA
chrII:406116-406120:+	8.79159	-0.638713	0.41855	0.61139
chrII:406169-406229:+	41.2417	-0.860723	0.0487416	0.152414
chrII:406559:+	0.246892	-2.08121	0.650739	NA
chrII:406586:+	0.880104	-1.88389	0.491466	NA
chrII:407356-407363:+	19.1921	-0.36264	0.528788	0.70136
chrII:407516:+	1.04705	-0.560368	0.816105	NA
chrII:407550-407571:+	6.51932	-0.783467	0.443528	NA
chrII:407614-407648:+	5.49659	-1.9709	0.111111	NA
chrII:407973:+	6.06607	-0.190654	0.868575	NA
chrII:408019:+	2.08863	-0.395228	0.811179	NA
chrII:408947-408970:+	44.6734	-0.49709	0.211795	0.397079
chrII:409074-409148:+	974.742	-0.000277249	0.998632	0.99931
chrII:409169-409196:+	166.787	0.0961509	0.696584	0.825232
chrII:409222:+	10.8844	-0.259183	0.684545	0.816111
chrII:409248-409254:+	44.133	0.407552	0.268766	0.462373
chrII:409387:+	3.42921	-0.630906	0.589128	NA
chrII:409415-409429:+	17.3292	-0.340761	0.525462	0.699167
chrII:410427:+	0.0715251	0.372256	0.940621	NA
chrII:410951-411062:+	2056.47	-0.313771	0.127831	0.286441
chrII:411416:+	0.246892	-2.08121	0.650739	NA
chrII:411518:+	0.539013	-2.60859	0.405975	NA
chrII:412117:+	1.39091	-3.14969	0.18105	NA
chrII:412309:+	0.0756909	-1.01506	0.838727	NA
chrII:412538:+	0.171201	-1.21604	0.806893	NA
chrII:412679-412682:+	1.26169	-3.70836	0.138592	NA
chrII:412888:+	0.398274	-2.98847	0.430693	NA
chrII:412934:+	0.0715251	0.372256	0.940621	NA
chrII:413290:+	0.284741	2.01971	0.684288	NA
chrII:413794-413804:+	3.77872	0.382317	0.736487	NA
chrII:415841:+	11.1828	-0.318554	0.619368	0.772304
chrII:415863-415921:+	944.083	0.673667	0.00046846	0.00551117
chrII:418328-418343:+	12.7961	-0.202531	0.752416	0.859242
chrII:418370-418395:+	41.0094	-0.443242	0.239464	0.429864
chrII:419406:+	8.4742	0.0274287	0.972181	0.985212
chrII:419443-419467:+	91.9167	-0.118958	0.690021	0.820245
chrII:419767:+	4.76478	-0.358344	0.730023	NA
chrII:419911-419923:+	4.72789	-1.92332	0.11975	NA
chrII:419961-419977:+	5.15606	-0.330336	0.764503	NA
chrII:420004-420024:+	5.05811	-1.45255	0.183831	NA
chrII:420117-420128:+	2.55978	-4.63703	0.0143488	NA
chrII:420161:+	0	NA	NA	NA
chrII:420184:+	1.62336	-1.03491	0.698354	NA
chrII:420265:+	0.874053	-1.92855	0.516353	NA
chrII:423333-423357:+	1.60746	-0.913236	0.589929	NA
chrII:423384-423401:+	2.16974	0.455111	0.772268	NA
chrII:423467-423586:+	221.376	-0.73324	0.00797091	0.043376
chrII:423626-423631:+	16.0782	-0.782067	0.189465	0.370022
chrII:423735-423770:+	577.208	0.0489442	0.798242	0.887314
chrII:423912:+	0.840985	-0.191001	0.933538	NA
chrII:424614-424615:+	18.1957	-3.7631	2.11e-06	8.71e-05
chrII:426037-426092:+	59.5159	0.030518	0.953801	0.976537
chrII:426169:+	4.15976	-2.00356	0.323394	NA
chrII:427132-427153:+	65.8743	-0.460158	0.141825	0.307347
chrII:427716:+	37.0334	-1.39065	0.000571117	0.0063874
chrII:429558-429598:+	231.281	-1.48344	8.41e-08	6.67e-06
chrII:430668:+	1.6267	-4.30293	0.0413839	NA
chrII:431407:+	0.681103	-1.15309	0.711523	NA
chrII:431453:+	0.512213	-1.02368	0.76283	NA
chrII:431503:+	0.346567	-2.72523	0.497264	NA
chrII:431935-431947:+	9.19273	0.38287	0.622315	0.774619
chrII:431970-432017:+	245.466	-0.327415	0.147888	0.31487
chrII:432812:+	0.144905	0.372269	0.940619	NA
chrII:432836:+	0	NA	NA	NA
chrII:432997:+	0.419948	-2.72154	0.422721	NA
chrII:433450-433467:+	4.92979	1.13531	0.25172	NA
chrII:434301-434320:+	31.6017	-0.290365	0.585618	0.74648
chrII:434364:+	0.68731	1.94043	0.470981	NA
chrII:435904-436018:+	1612.53	0.68616	7.36e-06	0.000240009
chrII:436424:+	0.218285	0.372276	0.940618	NA
chrII:436695:+	0.248747	-2.0812	0.649928	NA
chrII:436883-436941:+	197.579	-0.782016	0.000643619	0.00697942
chrII:439411-439428:+	0.64606	-3.08015	0.299185	NA
chrII:440473:+	0	NA	NA	NA
chrII:440517:+	0	NA	NA	NA
chrII:441465-441517:+	328.608	-0.135682	0.495999	0.67607
chrII:442975:+	0.0756909	-1.01506	0.838727	NA
chrII:443380-443394:+	3.11265	0.824536	0.522921	NA
chrII:444975:+	2.85841	0.372238	0.874214	NA
chrII:444998:+	0.978966	-1.14525	0.701187	NA
chrII:445021-445033:+	2.74304	-5.26417	0.00550403	NA
chrII:445077:+	0.291617	0.372284	0.940616	NA
chrII:445102-445120:+	1.28077	-2.61602	0.261369	NA
chrII:447506-447603:+	1211.23	0.0512197	0.802317	0.889734
chrII:447675:+	3.89767	0.120874	0.914581	NA
chrII:447711-447717:+	18.6046	0.725656	0.216988	0.402592
chrII:447741-447744:+	7.01178	0.39394	0.667685	NA
chrII:449537-449620:+	1793.53	0.334772	0.101935	0.247188
chrII:450097-450108:+	6.49944	0.17472	0.858485	NA
chrII:450550:+	2.45726	2.45153	0.135833	NA
chrII:450586:+	0.0733802	0.372257	0.940621	NA
chrII:452178:+	0.363646	-1.01844	0.804256	NA
chrII:452521:+	15.3551	-0.986771	0.174007	0.351398
chrII:452543-452646:+	9735.37	0.621402	0.0228047	0.090859
chrII:452672:+	1.34041	2.0406	0.286837	NA
chrII:452701:+	0.716235	-3.36779	0.224159	NA
chrII:452730-452731:+	2.30655	-3.40885	0.0684793	NA
chrII:452776-452812:+	38.1916	0.557901	0.269693	0.46356
chrII:452848-452900:+	61.252	0.148119	0.671786	0.80694
chrII:452926-452957:+	36.5884	0.0729323	0.878523	0.935363
chrII:453007:+	0.317075	0.352932	0.934379	NA
chrII:453045:+	0.23585	0.431392	0.930474	NA
chrII:453075-453109:+	15.2144	0.348129	0.617108	0.770657
chrII:453193:+	0	NA	NA	NA
chrII:453566-453603:+	74.9416	-0.17051	0.587582	0.747961
chrII:454743-454815:+	637.159	0.140999	0.439527	0.62924
chrII:455771-455774:+	0.602889	0.195199	0.945775	NA
chrII:455806:+	0.46294	-1.10787	0.766348	NA
chrII:455890-455895:+	0.72367	0.239066	0.928723	NA
chrII:456115-456124:+	0.53772	-0.534326	0.882901	NA
chrII:456594-456619:+	1.47925	-0.705364	0.716623	NA
chrII:457503-457536:+	9.63381	0.213741	0.80152	0.889321
chrII:458648-458718:+	291.416	0.195861	0.32195	0.517248
chrII:458790-458865:+	308.836	0.0295238	0.883945	0.937741
chrII:459740:+	0.282934	2.01974	0.684283	NA
chrII:460599:+	1.81894	-2.1822	0.358839	NA
chrII:460642-460648:+	13.985	-1.42682	0.257819	0.450052
chrII:460872:+	0.559849	-0.694207	0.813226	NA
chrII:461850:+	1.52572	-1.88085	0.370487	NA
chrII:462037:+	1.42694	-2.73211	0.192588	NA
chrII:462076-462182:+	2358.59	0.380809	0.128928	0.287994
chrII:462203-462227:+	19.0522	-0.550445	0.30373	0.498529
chrII:462252-462322:+	36.9751	-0.568953	0.163028	0.336601
chrII:462345:+	0.485965	0.222148	0.944559	NA
chrII:462585:+	0.876012	-1.1607	0.589832	NA
chrII:466161:+	7.73888	-0.069528	0.932931	0.965771
chrII:467130-467236:+	771.182	-0.0643895	0.747966	0.85572
chrII:467349:+	3.84377	0.440264	0.699205	NA
chrII:467374:+	4.31782	-0.35399	0.737289	NA
chrII:468061:+	0.0996757	-1.21606	0.806891	NA
chrII:468707:+	0.361001	0.128997	0.973693	NA
chrII:468730-468771:+	2.61039	-0.0535618	0.968899	NA
chrII:469101:+	0.0928172	1.73951	0.727061	NA
chrII:469408-469411:+	0	NA	NA	NA
chrII:472267:+	0	NA	NA	NA
chrII:474272-474344:+	365.437	-1.15257	3.63e-07	2.17e-05
chrII:474388-474408:+	18.6785	-1.44654	0.0963602	0.237642
chrII:474568-474582:+	6.64299	-0.955612	0.314244	NA
chrII:477445:+	4.17947	0.553917	0.68371	NA
chrII:477474:+	1.60169	-1.03693	0.688866	NA
chrII:477522-477670:+	12564.6	0.711263	0.0141002	0.0641726
chrII:478390-478432:+	304.306	0.444186	0.107375	0.254838
chrII:478462-478504:+	190.909	0.269036	0.367444	0.562479
chrII:479011-479012:+	1.33252	-0.722675	0.680327	NA
chrII:479041-479048:+	2.70844	0.170418	0.899839	NA
chrII:479257-479317:+	1692.24	-0.0111268	0.956123	0.977717
chrII:479338:+	12.0331	-1.22285	0.078078	0.206589
chrII:479403-479435:+	144.797	-0.0144706	0.957797	0.978046
chrII:479524:+	3.79494	0.541313	0.612573	NA
chrII:479613:+	0	NA	NA	NA
chrII:479687:+	1.03703	0.267378	0.899419	NA
chrII:479731:+	0.536366	1.95581	0.533132	NA
chrII:479942:+	0.320272	-2.07972	0.579747	NA
chrII:479995:+	35.4698	0.260629	0.511093	0.688974
chrII:481192-481225:+	32.3146	-0.0790897	0.887459	0.939931
chrII:483494:+	1.21146	1.24873	0.610075	NA
chrII:483686:+	10.3242	-0.101437	0.902664	0.949059
chrII:483708-483728:+	7.89738	0.396414	0.745477	0.854123
chrII:483752-483806:+	102.753	-0.731546	0.0677705	0.188844
chrII:484735-484772:+	136.917	-0.750616	0.0491633	0.153237
chrII:485879:+	0.222907	-1.89191	0.699833	NA
chrII:488673-488682:+	85.1419	1.05458	0.00115793	0.0106791
chrII:488728-488791:+	413.781	0.544279	0.00834922	0.0449428
chrII:488828:+	0.66449	-1.02624	0.745831	NA
chrII:490808-490937:+	4265.13	0.382196	0.11401	0.265742
chrII:490977:+	0.147216	-1.01505	0.83873	NA
chrII:491013-491014:+	0.689603	0.501347	0.83953	NA
chrII:491175-491208:+	37.8378	0.306769	0.542041	0.712145
chrII:493039-493105:+	226.064	-1.03703	0.000142789	0.00230585
chrII:493135:+	0.218741	-1.01503	0.838732	NA
chrII:493181-493190:+	82.0504	-0.627086	0.132898	0.294378
chrII:493273:+	1.35531	-3.71472	0.0955791	NA
chrII:494312-494328:+	16.3141	-0.684571	0.399159	0.593476
chrII:495565-495594:+	54.5825	-0.174193	0.665016	0.802746
chrII:497111-497176:+	560.424	-0.615877	0.00131501	0.0117385
chrII:497208:+	5.75673	-1.14861	0.240094	NA
chrII:497785-497795:+	2.0653	-1.13518	0.439314	NA
chrII:497822-497832:+	1.67911	-1.14956	0.527172	NA
chrII:498341:+	0.0715251	0.372256	0.940621	NA
chrII:498561:+	0.0756909	-1.01506	0.838727	NA
chrII:498595:+	1.24419	-4.52447	0.0534233	NA
chrII:498983:+	0.0715251	0.372256	0.940621	NA
chrII:499034-499046:+	0.589806	-1.3324	0.638142	NA
chrII:499397:+	1.0109	1.63009	0.589285	NA
chrII:501840:+	1.1892	-1.12691	0.677573	NA
chrII:504575:+	18.9028	0.188089	0.73465	0.847762
chrII:504745-504827:+	2277.13	0.570265	0.000425028	0.00513508
chrII:505101:+	0.0715251	0.372256	0.940621	NA
chrII:505612-505668:+	104.992	-0.569625	0.0951999	0.235659
chrII:506732-506739:+	0.361791	-1.0159	0.829061	NA
chrII:506769:+	0	NA	NA	NA
chrII:506880:+	0	NA	NA	NA
chrII:507018-507032:+	0.0733802	0.372257	0.940621	NA
chrII:508115-508128:+	0.322127	-2.08066	0.62195	NA
chrII:509477:+	0	NA	NA	NA
chrII:510306:+	0	NA	NA	NA
chrII:510332-510350:+	1.46697	2.23802	0.319066	NA
chrII:511899:+	1.08242	1.61344	0.562678	NA
chrII:512431:+	0.224762	-1.89191	0.699833	NA
chrII:512695-512705:+	12.0539	-0.247927	0.707031	0.831819
chrII:512908-512991:+	823.127	1.19104	5.94e-07	3.19e-05
chrII:513014-513018:+	3.23221	1.06427	0.376249	NA
chrII:513067:+	4.46693	0.137501	0.910187	NA
chrII:513110:+	3.59538	1.11658	0.367741	NA
chrII:513217:+	0.641895	-2.71453	0.330781	NA
chrII:513249-513250:+	51.7611	0.76628	0.0342697	0.11963
chrII:513273-513281:+	33.9005	0.948418	0.0245233	0.0953557
chrII:513363-513377:+	28.5425	0.0602194	0.895703	0.945614
chrII:515612:+	7.9231	-0.605332	0.476157	0.659378
chrII:515638-515675:+	973.083	-0.110586	0.551603	0.719064
chrII:515712-515731:+	11.5287	-0.226911	0.714115	0.835857
chrII:516151:+	0.246892	-2.08121	0.650739	NA
chrII:517048:+	1.63977	-3.52953	0.0872558	NA
chrII:521218:+	0	NA	NA	NA
chrII:521436:+	0	NA	NA	NA
chrII:523717:+	0.810076	-1.02442	0.757757	NA
chrII:527129-527184:+	113.513	-0.463407	0.0706059	0.193588
chrII:527221:+	2.67521	0.905547	0.521366	NA
chrII:528201-528299:+	1734.53	-0.0806948	0.63295	0.782637
chrII:528502:+	13.2102	0.425206	0.492238	0.672956
chrII:530127-530151:+	2.69173	1.29422	0.382924	NA
chrII:530240:+	0	NA	NA	NA
chrII:530264:+	0	NA	NA	NA
chrII:530290-530303:+	1.2074	0.28099	0.877473	NA
chrII:530416-530480:+	10.7931	0.41763	0.551093	0.71871
chrII:532468:+	34.043	-0.325396	0.436044	0.626406
chrII:532497-532526:+	112.812	-0.257948	0.300135	0.49504
chrII:533626-533644:+	54.4037	-0.0870826	0.788341	0.881077
chrII:533679-533748:+	401.138	0.130324	0.468526	0.6528
chrII:533843:+	3.82498	0.164248	0.874132	NA
chrII:535165-535262:+	1492.45	-0.0762662	0.628035	0.778731
chrII:535537:+	0.542723	-2.60861	0.405391	NA
chrII:535699-535709:+	26.3958	0.6667	0.14538	0.311395
chrII:535852:+	0.228991	2.8364	0.562065	NA
chrII:536005:+	0.441192	-1.90688	0.610301	NA
chrII:536427-536464:+	115.134	-0.2561	0.2949	0.489868
chrII:536488:+	0.627265	-0.541698	0.834216	NA
chrII:536515:+	1.31405	0.44546	0.793607	NA
chrII:536550:+	4.49661	-0.933116	0.379593	NA
chrII:537693-537709:+	27.2159	0.422867	0.448065	0.6367
chrII:537776-537779:+	4.23736	-0.783704	0.454368	NA
chrII:538486:+	2.16184	0.0638992	0.967204	NA
chrII:538734:+	4.68336	0.567467	0.57636	NA
chrII:539466:+	4.02237	-0.675456	0.535362	NA
chrII:539492-539518:+	41.7728	0.434879	0.243951	0.434346
chrII:539872-540055:+	3331.14	0.400553	0.0101076	0.0509818
chrII:540331:+	0.224258	-1.01505	0.83873	NA
chrII:540759:+	0.168508	0.352204	0.943547	NA
chrII:540818:+	0.0756909	-1.01506	0.838727	NA
chrII:540857:+	0	NA	NA	NA
chrII:541253:+	1.08332	-0.077544	0.967928	NA
chrII:541328:+	4.30914	-0.892239	0.424489	NA
chrII:541359-541375:+	5.40229	0.470919	0.63056	NA
chrII:542084-542112:+	8.89199	-1.2702	0.345128	0.539595
chrII:544863-544969:+	1953.52	0.377955	0.0249516	0.0964761
chrII:546297-546339:+	492.085	0.0129296	0.944883	0.971956
chrII:546364-546378:+	221.233	-0.19385	0.373265	0.568272
chrII:546836:+	0.149071	-1.01505	0.83873	NA
chrII:547236:+	0	NA	NA	NA
chrII:547381-547413:+	293.406	-0.0875435	0.700603	0.827261
chrII:547453:+	5.84674	0.146724	0.863917	NA
chrII:547527:+	1.41678	-2.26285	0.279738	NA
chrII:547933-547955:+	28.6137	0.101141	0.826315	0.90416
chrII:549235:+	9.03872	1.30643	0.128464	0.28735
chrII:549256:+	6.58723	-0.453069	0.603697	NA
chrII:549671-549758:+	3043.32	0.381468	0.0230781	0.091548
chrII:550531:+	3.19349	-4.83602	0.01278	NA
chrII:550657:+	0	NA	NA	NA
chrII:550745:+	2.19525	-0.633069	0.732907	NA
chrII:553398-553411:+	35.9473	-0.142189	0.722487	0.840818
chrII:553432:+	11.3832	-0.0200886	0.975323	0.986721
chrII:553475-553481:+	50.3208	-0.57813	0.105466	0.252241
chrII:554665:+	8.0005	-0.483685	0.508437	0.686747
chrII:554983:+	2.70805	0.221438	0.871053	NA
chrII:555077-555092:+	48.1156	-0.55256	0.14875	0.316213
chrII:555195:+	3.66089	0.131281	0.911704	NA
chrII:555254-555273:+	24.2386	0.264837	0.556664	0.723191
chrII:555464-555515:+	191.501	-0.331639	0.131941	0.292931
chrII:556064-556071:+	5.98442	-0.914801	0.359525	NA
chrII:556139-556150:+	12.0182	-0.924898	0.186225	0.365626
chrII:556173-556207:+	63.7192	-0.675395	0.0275024	0.102844
chrII:556265-556333:+	1705.89	-0.122811	0.457103	0.643205
chrII:556469:+	3.20443	-0.285265	0.807026	NA
chrII:556575:+	1.21233	-4.36742	0.0664557	NA
chrII:556757:+	0.611556	-1.1136	0.717965	NA
chrII:556986:+	0.151382	-1.89193	0.69983	NA
chrII:557089:+	0.0715251	0.372256	0.940621	NA
chrII:557123:+	0.790966	-3.07864	0.236666	NA
chrII:557159-557160:+	2.74873	-3.38477	0.067523	NA
chrII:557184:+	0.199351	-2.25274	0.644369	NA
chrII:557264:+	0.740219	-3.43595	0.211758	NA
chrII:557601:+	0.738551	-1.02105	0.782351	NA
chrII:557665:+	0.28531	0.979156	0.841326	NA
chrII:557784-557785:+	2.69008	-3.97703	0.0278538	NA
chrII:558007:+	0.147216	-1.01505	0.83873	NA
chrII:558117:+	0.218285	0.372276	0.940618	NA
chrII:558200:+	0.0715251	0.372256	0.940621	NA
chrII:558605-558707:+	3208.58	0.679365	6.84e-05	0.00134009
chrII:559529:+	0.838252	1.14722	0.646391	NA
chrII:559892:+	3.62706	0.778397	0.497173	NA
chrII:559913-560082:+	2494.38	0.420349	0.0109783	0.053961
chrII:561264:+	3.14893	-0.856228	0.520862	NA
chrII:561337:+	15.8357	-0.598521	0.425228	0.617288
chrII:561358:+	8.99043	0.584453	0.523846	0.698135
chrII:561405-561413:+	97.8151	-0.390697	0.14255	0.308388
chrII:561440:+	17.1044	-0.065557	0.90429	0.949974
chrII:561469:+	16.054	-0.307805	0.564996	0.730439
chrII:561504-561513:+	28.6053	-0.355918	0.408838	0.601974
chrII:561535-561567:+	183.361	-0.365569	0.117374	0.270622
chrII:561600-561631:+	269.913	-0.636298	0.0045093	0.0289113
chrII:561666:+	7.12214	-1.2145	0.145147	NA
chrII:562582-562597:+	2.28694	0.00197155	0.998821	NA
chrII:562791:+	0.658825	1.71346	0.575557	NA
chrII:562915:+	0	NA	NA	NA
chrII:564849-564864:+	183.162	-0.260829	0.238882	0.429433
chrII:564977-565019:+	350.491	-0.307813	0.160367	0.333012
chrII:565165-565285:+	7748.28	0.618895	0.00460419	0.0293022
chrII:565309-565313:+	6.33107	-0.0801915	0.931241	NA
chrII:565429:+	0.291666	0.372281	0.940617	NA
chrII:565604-565659:+	392.105	-0.3155	0.117687	0.271041
chrII:565688:+	12.171	-0.427793	0.502593	0.681396
chrII:565723:+	4.80531	-0.535855	0.596889	NA
chrII:565816:+	0.59948	-3.66681	0.252984	NA
chrII:565838:+	2.34425	-0.534274	0.687818	NA
chrII:566017:+	2.89229	0.277836	0.814644	NA
chrII:567284-567290:+	0.681617	1.75431	0.576242	NA
chrII:567329:+	0	NA	NA	NA
chrII:567482-567484:+	0.321808	3.33506	0.47409	NA
chrII:568735-568768:+	313.354	-0.282534	0.171051	0.347718
chrII:568805:+	4.36275	-0.711891	0.497427	NA
chrII:569468:+	5.28631	-0.0183369	0.984081	NA
chrII:569964:+	0.343875	-1.23441	0.757613	NA
chrII:571381-571444:+	176.296	-1.61138	1.29e-06	5.85e-05
chrII:572052-572055:+	29.3058	-1.03762	0.0237498	0.0933326
chrII:572077-572111:+	86.3627	-0.357626	0.195781	0.377196
chrII:572244-572256:+	128.21	-0.416038	0.073604	0.198883
chrII:572284-572288:+	7.43843	-0.434899	0.596823	0.754863
chrII:572419:+	11.0709	-0.333677	0.610147	0.765635
chrII:572670:+	0.460107	-0.492434	0.882735	NA
chrII:573406:+	0.0733802	0.372257	0.940621	NA
chrII:573454:+	0.237722	1.74043	0.714325	NA
chrII:574353:+	6.40247	1.30444	0.504684	NA
chrII:576327-576393:+	173.88	-1.39963	0.000213581	0.0030685
chrII:576447:+	0.856014	-2.21277	0.432176	NA
chrII:576474-576480:+	3.86719	-5.23087	0.00313092	NA
chrII:578307-578394:+	2717.17	0.489778	0.0309467	0.11185
chrII:578676-578699:+	12.6653	0.0541005	0.935014	0.967201
chrII:578885:+	0.371474	-1.90225	0.634999	NA
chrII:578921:+	0.299027	-2.84285	0.557645	NA
chrII:581634:+	3.642	0.816432	0.583399	NA
chrII:581669-581715:+	33.7499	-0.359947	0.389869	0.584429
chrII:581736:+	1.52717	-0.0318848	0.985587	NA
chrII:582059:+	0.363191	0.372272	0.935084	NA
chrII:582369-582431:+	927.169	-0.0469205	0.76599	0.866696
chrII:582914:+	0.0996757	-1.21606	0.806891	NA
chrII:583586-583699:+	879.954	0.182802	0.277301	0.471568
chrII:583786:+	1.68283	0.264297	0.867725	NA
chrII:583813:+	1.67726	0.54326	0.752061	NA
chrII:586545-586553:+	8.38755	0.261905	0.782733	0.877147
chrII:586593:+	2.9007	-0.170958	0.912477	NA
chrII:593204-593266:+	110.016	-1.05415	0.000448249	0.00532543
chrII:595004-595016:+	16.4359	-0.423623	0.509532	0.687778
chrII:595873-596114:+	536.71	-0.893855	4.2e-06	0.000155344
chrII:596141:+	4.10992	-1.61723	0.156222	NA
chrII:597325-597375:+	218.169	-0.452435	0.100202	0.244389
chrII:597418:+	5.84707	-1.27645	0.165612	NA
chrII:598568-598584:+	5.52703	-0.131599	0.897473	NA
chrII:598605-598667:+	19.9521	0.270973	0.611214	0.766036
chrII:599684:+	0.542675	-2.60841	0.411367	NA
chrII:600149-600175:+	100.206	-0.368455	0.253451	0.445558
chrII:600542-600547:+	5.85258	-1.14203	0.200993	NA
chrII:602477-602625:+	4122.92	0.639761	0.000227078	0.0032229
chrII:602847:+	0.372024	1.4846	0.742218	NA
chrII:602917:+	1.17454	-2.35129	0.295133	NA
chrII:603279:+	0.348422	-2.72521	0.496643	NA
chrII:604412-604567:+	12968.3	0.427298	0.179127	0.357312
chrII:604620-604649:+	45.5234	-0.529909	0.159128	0.331279
chrII:604928-604962:+	1371.11	0.478247	0.115437	0.267889
chrII:604999-605478:+	2730.87	1.12994	2.13e-06	8.75e-05
chrII:605622-605626:+	14.1014	-0.792609	0.310253	0.505143
chrII:606173-606253:+	3936.63	0.875691	0.00110553	0.010306
chrII:606281-606322:+	249.931	-0.94858	1.88e-05	0.000499765
chrII:606349:+	4.37238	-1.69584	0.124349	NA
chrII:606669-606680:+	51.0336	0.212944	0.529102	0.70155
chrII:606718-606726:+	5.2101	-3.68956	0.00836011	NA
chrII:606752:+	0.551574	-0.155171	0.954453	NA
chrII:606785-606807:+	9.18066	-0.890397	0.30482	0.499419
chrII:606845-606869:+	11.5897	-0.464198	0.498032	0.677602
chrII:606890:+	0.510463	-1.28998	0.717384	NA
chrII:606913-606951:+	200.13	1.01139	1.49e-05	0.000415084
chrII:606972-606988:+	162.553	1.28838	1.99e-07	1.33e-05
chrII:607027-607052:+	70.1808	1.09669	0.00519494	0.0320065
chrII:607215:+	5.41796	3.94952	0.00286782	NA
chrII:607310:+	9.34407	-0.55237	0.448971	0.637276
chrII:607438-607538:+	1076.06	0.19098	0.235167	0.424464
chrII:607640:+	2.37119	1.55156	0.270644	NA
chrII:608554:+	0	NA	NA	NA
chrII:609377-609389:+	12.1122	-1.51079	0.12285	0.278552
chrII:609421:+	4.01238	-0.468287	0.739927	NA
chrII:609839-609856:+	2.73668	0.443677	0.777327	NA
chrII:609888-609985:+	596.108	0.500655	0.0233394	0.0923014
chrII:610008:+	1.26703	0.366529	0.834644	NA
chrII:610045-610058:+	10.5215	-0.636225	0.346548	0.540888
chrII:610103:+	1.59261	-2.16149	0.299063	NA
chrII:610292:+	3.42849	-1.93906	0.17917	NA
chrII:614203-614228:+	290.595	-1.23167	3.15e-07	1.93e-05
chrII:614391-614413:+	178.104	-1.18073	6.12e-06	0.000209106
chrII:614438-614485:+	511.323	-0.868625	0.000147028	0.00234594
chrII:614520:+	88.3968	-0.135143	0.709796	0.833909
chrII:614544-614560:+	85.6519	-0.366546	0.369798	0.564713
chrII:614629:+	7.85109	-1.4433	0.151865	0.320264
chrII:615077:+	7.78367	-1.83065	0.168651	0.34459
chrII:615293:+	2.08844	2.68508	0.229897	NA
chrII:615331:+	3.3539	1.23887	0.550981	NA
chrII:615362:+	3.14517	-0.0897208	0.957423	NA
chrII:615397-615402:+	51.8092	-0.732702	0.0797218	0.209581
chrII:615578:+	5.40625	-1.02236	0.318638	NA
chrII:615627:+	4.66884	-0.261066	0.801701	NA
chrII:618799-618866:+	2267.18	0.130921	0.457081	0.643205
chrII:618887:+	3.11256	-0.899713	0.492582	NA
chrII:619163:+	0.466528	-1.17124	0.736251	NA
chrII:619470:+	0	NA	NA	NA
chrII:619599:+	0.0756909	-1.01506	0.838727	NA
chrII:619678:+	22.3163	0.632929	0.182929	0.361939
chrII:619942:+	0.328667	1.263	0.759809	NA
chrII:620325:+	0.679753	-2.07678	0.48407	NA
chrII:620788-620841:+	876.085	-0.142097	0.439907	0.629584
chrII:623392-623483:+	976.834	0.274085	0.191607	0.372652
chrII:624872:+	3.11694	-1.30084	0.33126	NA
chrII:625274-625276:+	8.06374	-2.04799	0.0462955	0.147646
chrII:625309-625336:+	45.2536	-2.74782	2.37e-06	9.61e-05
chrII:625640:+	7.9624	-1.30845	0.121036	0.275849
chrII:625663-625767:+	958.283	-0.592224	0.00384176	0.0257666
chrII:628934-628989:+	37.6283	-0.183732	0.632933	0.782637
chrII:629017:+	0	NA	NA	NA
chrII:629129-629143:+	6.40902	-0.413287	0.636202	NA
chrII:629182-629190:+	0.552925	0.378134	0.891907	NA
chrII:629985-630003:+	7.3361	-0.465507	0.572061	NA
chrII:630024-630036:+	7.83384	-0.99264	0.270546	0.464267
chrII:631213:+	1.29559	-0.102879	0.955966	NA
chrII:631253:+	3.52599	0.424599	0.733694	NA
chrII:631699:+	0.466984	-2.07862	0.539032	NA
chrII:631720:+	0.582417	-1.59194	0.600674	NA
chrII:632138-632143:+	1.06064	0.450916	0.830523	NA
chrII:633563-633691:+	1733.19	0.322844	0.0261779	0.0994446
chrII:633746:+	0.889291	-3.6652	0.155289	NA
chrII:633985:+	0.0756909	-1.01506	0.838727	NA
chrII:634571:+	0.893408	-3.86309	0.142961	NA
chrII:634928:+	0.0715251	0.372256	0.940621	NA
chrII:635020-635146:+	740.639	0.0457628	0.789438	0.8817
chrII:635215:+	0.514301	2.15642	0.53171	NA
chrII:636461:+	1.20453	-0.173079	0.931675	NA
chrII:636524:+	0.0996757	-1.21606	0.806891	NA
chrII:636898:+	1.4709	-1.96011	0.41796	NA
chrII:640126-640136:+	0.525678	1.74814	0.627642	NA
chrII:640174-640180:+	0.246892	-2.08121	0.650739	NA
chrII:641394:+	0.0756909	-1.01506	0.838727	NA
chrII:644092:+	1.65607	-0.852035	0.675049	NA
chrII:644344:+	0.749936	0.356656	0.900978	NA
chrII:645156:+	11.4748	-0.260696	0.770405	0.869012
chrII:645313-645392:+	251.362	0.354853	0.110454	0.25978
chrII:645474:+	3.17268	0.0470075	0.967492	NA
chrII:645500-645567:+	811.915	0.196858	0.220331	0.406862
chrII:646046-646068:+	1.11358	-0.559569	0.822928	NA
chrII:647434-647509:+	349.111	-0.112478	0.551779	0.71918
chrII:647531-647546:+	43.7037	-0.202805	0.609314	0.765175
chrII:650250-650300:+	505.248	0.0860523	0.639859	0.787677
chrII:650334-650338:+	23.6624	-0.162931	0.735912	0.848556
chrII:651293-651382:+	1368.56	-0.292306	0.111346	0.261177
chrII:652912-652934:+	8.38783	0.208147	0.814166	0.897368
chrII:652968-652987:+	4.69141	-0.0379969	0.97099	NA
chrII:653279-653340:+	581.506	0.0500052	0.770497	0.869013
chrII:653371:+	3.75264	-1.04555	0.346957	NA
chrII:653451:+	25.8501	-0.0993196	0.83508	0.909591
chrII:653864:+	0.0756909	-1.01506	0.838727	NA
chrII:654699:+	0.67199	0.522681	0.847613	NA
chrII:654747-654750:+	1.25279	1.15767	0.616565	NA
chrII:654775:+	0	NA	NA	NA
chrII:654893-654907:+	0.940741	1.66119	0.472451	NA
chrII:654934-654948:+	4.33356	1.72577	0.115377	NA
chrII:655528-655532:+	0.0928172	1.73951	0.727061	NA
chrII:656053:+	0	NA	NA	NA
chrII:657742:+	5.7766	0.327841	0.718479	NA
chrII:657764-657832:+	839.351	-0.0645621	0.772909	0.870314
chrII:658439-658450:+	1.51297	0.311774	0.847426	NA
chrII:658480-658531:+	12.3433	0.791306	0.209763	0.394549
chrII:662862-662879:+	5.1168	-4.01474	0.0219317	NA
chrII:662914-662927:+	4.0356	-3.0225	0.109219	NA
chrII:664906-664960:+	6.70767	-0.939934	0.527296	NA
chrII:666650-666674:+	16.007	-0.661749	0.340447	0.534774
chrII:668923-668939:+	4.91195	-2.77501	0.0985719	NA
chrII:670440:+	6.15717	-0.46881	0.570717	NA
chrII:670464-670518:+	188.195	-0.632804	0.00545045	0.0332066
chrII:670598-670620:+	29.0353	-0.70351	0.104675	0.250899
chrII:671529:+	0.415782	-2.24196	0.561392	NA
chrII:672109:+	0.144905	0.372269	0.940619	NA
chrII:672138-672149:+	2.1572	-0.184112	0.917837	NA
chrII:672178:+	1.11887	1.75965	0.539521	NA
chrII:672532:+	0.585257	3.49199	0.254803	NA
chrII:672933:+	0	NA	NA	NA
chrII:672964-673016:+	0.960816	-3.66491	0.144453	NA
chrII:674950:+	7.58498	-3.62567	0.0339421	0.11899
chrII:674978-674994:+	32.791	0.312873	0.466526	0.651542
chrII:675293-675346:+	779.211	0.494337	0.00379124	0.025493
chrII:675371-675393:+	234.197	0.280378	0.169471	0.345792
chrII:675642-675669:+	29.7842	0.838292	0.0776288	0.205793
chrII:675692:+	26.3314	0.888042	0.0409186	0.135764
chrII:675798-675879:+	52.756	0.584444	0.0766292	0.203934
chrII:676374:+	0	NA	NA	NA
chrII:676807:+	0	NA	NA	NA
chrII:679430-679445:+	49.8888	-0.479026	0.359054	0.553145
chrII:679466:+	5.04171	-1.15569	0.417884	NA
chrII:680279-680419:+	3196.51	1.28026	6.7e-09	8.02e-07
chrII:680838-680839:+	0	NA	NA	NA
chrII:680881-680883:+	0	NA	NA	NA
chrII:680910-680944:+	0.224762	-1.89191	0.699833	NA
chrII:680969-680978:+	0.166197	1.73952	0.727058	NA
chrII:680999-681027:+	1.53527	1.91251	0.508505	NA
chrII:682181-682239:+	142.007	-0.52101	0.34927	0.543669
chrII:683274-683391:+	988.294	0.0370342	0.823269	0.902452
chrII:683436:+	10.2214	-0.179054	0.797844	0.886991
chrII:684167:+	4.01475	0.517185	0.652601	NA
chrII:684864-684994:+	1983.76	0.45676	0.0262358	0.0995595
chrII:685203:+	0.224258	-1.01505	0.83873	NA
chrII:686799-686852:+	213.17	-0.411752	0.0570487	0.168399
chrII:688703:+	0	NA	NA	NA
chrII:688886:+	0	NA	NA	NA
chrII:689133-689147:+	0	NA	NA	NA
chrII:689324:+	0.220092	0.372272	0.940618	NA
chrII:689534:+	0	NA	NA	NA
chrII:690017:+	0	NA	NA	NA
chrII:691910-691946:+	988.045	0.241894	0.259278	0.451686
chrII:691969-691981:+	16.3016	-0.0848949	0.885799	0.938757
chrII:697815-697842:+	113.99	0.0738702	0.771922	0.869821
chrII:697864-697907:+	233.492	-0.073398	0.753342	0.859772
chrII:697957-697968:+	13.5362	0.566508	0.388217	0.582699
chrII:698010-698046:+	126.243	0.114378	0.721634	0.840279
chrII:698073-698142:+	108.615	-0.352963	0.251553	0.443048
chrII:698221-698225:+	7.37433	-1.79026	0.102332	0.247485
chrII:698273:+	0.696861	-0.658461	0.824731	NA
chrII:698311-698333:+	14.1801	-2.05959	0.00827625	0.0446672
chrII:698865:+	2.28675	0.695908	0.627754	NA
chrII:699271:+	0.720019	-2.37359	0.400365	NA
chrII:700206:+	6.40402	-0.602376	0.499086	NA
chrII:700247-700262:+	6.14582	-0.803439	0.453551	NA
chrII:701069:+	2.56949	-1.96752	0.331115	NA
chrII:704394:+	5.03879	-1.33194	0.177657	NA
chrII:704454-704562:+	2291.28	0.543017	0.000613768	0.00674504
chrII:704584:+	5.00018	0.682718	0.474187	NA
chrII:704632-704687:+	151.199	-0.140112	0.566911	0.731868
chrII:704892:+	0.918612	1.79014	0.434706	NA
chrII:706972:+	17.4255	-0.205663	0.761238	0.864275
chrII:707002-707017:+	46.7706	-0.89604	0.0936732	0.232969
chrII:707182:+	4.1754	-0.937778	0.364681	NA
chrII:707294-707367:+	259.908	-0.379402	0.0561858	0.166683
chrII:707429-707534:+	3578.01	0.767826	0.000315606	0.00411617
chrII:707558-707573:+	41.0103	0.283714	0.432193	0.623384
chrII:707603:+	4.79769	0.969129	0.3147	NA
chrII:707626-707637:+	6.90198	0.228094	0.791058	NA
chrII:707674-707688:+	33.0652	1.43923	0.00122227	0.011104
chrII:707753:+	1.02694	-1.36318	0.543177	NA
chrII:707819-707834:+	11.0952	0.38941	0.540312	0.710613
chrII:707868:+	0.875948	-4.14688	0.148991	NA
chrII:711509-711591:+	850.873	0.0681682	0.699914	0.826745
chrII:711740:+	0.389104	-0.535208	0.880397	NA
chrII:712370:+	0.0733802	0.372257	0.940621	NA
chrII:712596:+	0.242726	-1.21603	0.806895	NA
chrII:712831:+	0.644726	0.536973	0.864336	NA
chrII:714667-714714:+	410.635	-0.933554	1.64e-05	0.000449319
chrII:714738:+	9.2715	1.29079	0.161784	0.335023
chrII:714772:+	5.1189	0.31304	0.79204	NA
chrII:714971:+	1.59993	-1.03798	0.684168	NA
chrII:716732-716758:+	162.33	0.0771467	0.823436	0.902452
chrII:716807:+	28.276	-2.48422	5.83e-05	0.0011914
chrII:718321-718332:+	13.6643	-0.253449	0.740319	0.851782
chrII:718373-718381:+	7.09717	-2.94063	0.022406	NA
chrII:718409-718447:+	62.6174	-0.862937	0.0557496	0.165824
chrII:718638:+	5.39995	1.39706	0.297769	NA
chrII:720379:+	2.33273	-0.646339	0.632565	NA
chrII:720408:+	2.52601	-0.419917	0.762358	NA
chrII:720536-720545:+	11.3914	-0.313311	0.649925	0.794164
chrII:721298-721389:+	1338.94	-0.0455349	0.779344	0.875024
chrII:722555-722624:+	2647.87	0.832769	0.000122515	0.00207448
chrII:722921-722923:+	0.889746	-3.86309	0.137847	NA
chrII:723200-723247:+	1774.06	0.32714	0.175002	0.352387
chrII:723272-723276:+	47.1896	-0.373286	0.29409	0.489195
chrII:723309:+	4.61015	-0.699905	0.496324	NA
chrII:723719:+	1.58156	-0.670252	0.764451	NA
chrII:723746:+	2.23401	0.303396	0.896982	NA
chrII:724387-724463:+	1108.25	0.0550797	0.77146	0.869769
chrII:724535-724536:+	7.2813	-2.65532	0.00667817	NA
chrII:725575:+	1.10906	-0.100182	0.958185	NA
chrII:725607-725633:+	10.2085	0.128934	0.865672	0.928671
chrII:725659-725707:+	9.57375	0.140021	0.847067	0.917227
chrII:725734:+	0	NA	NA	NA
chrII:725767:+	1.46189	1.92935	0.531885	NA
chrII:725807:+	0.284741	2.01971	0.684288	NA
chrII:725993:+	0.371978	-2.47805	0.534132	NA
chrII:726862:+	11.8901	-0.0492462	0.959362	0.978689
chrII:727219:+	7.74735	-0.00717156	0.992832	0.996226
chrII:728817-728906:+	916.115	0.370655	0.0628471	0.179497
chrII:730282-730300:+	34.8928	-0.769846	0.0570709	0.168399
chrII:730323-730358:+	204.017	-0.40393	0.084118	0.217171
chrII:734785-734822:+	33.6497	-1.57821	0.0117898	0.0567095
chrII:735665-735683:+	40.3146	-1.76733	0.0269227	0.101334
chrII:735710:+	13.0101	-0.636891	0.722964	0.841015
chrII:736161-736284:+	4676.63	0.329102	0.125337	0.282589
chrII:736665-736682:+	3.2718	0.439044	0.711624	NA
chrII:736721:+	0.272732	-2.25273	0.644372	NA
chrII:737186:+	0.0756909	-1.01506	0.838727	NA
chrII:737219-737237:+	5.31676	-0.441045	0.662736	NA
chrII:737441:+	0.228991	2.8364	0.562065	NA
chrII:737475:+	0.384921	-0.48187	0.891579	NA
chrII:737638:+	0.847469	2.32482	0.352689	NA
chrII:737661:+	0.38261	0.423379	0.917603	NA
chrII:738489-738581:+	1920.98	0.21722	0.245378	0.435744
chrII:738604:+	43.7852	-1.01466	0.0121144	0.0578299
chrII:738906:+	0.569019	-3.08034	0.308808	NA
chrII:739789-739850:+	2246.84	0.25854	0.129692	0.289426
chrII:739882:+	5.93358	0.156101	0.871939	NA
chrII:740463:+	0.314764	1.74262	0.686055	NA
chrII:741261-741338:+	2298.54	0.517913	0.0025218	0.0189185
chrII:741362:+	4.62611	0.759344	0.461092	NA
chrII:741823-741916:+	160.18	-0.103675	0.720042	0.839341
chrII:742755-742797:+	74.6697	-0.875817	0.00827969	0.0446711
chrII:744594:+	12.4549	0.717957	0.248083	0.438941
chrII:744780-744785:+	28.2172	0.430212	0.301913	0.496639
chrII:744808-744852:+	1392.37	0.208819	0.201466	0.384534
chrII:745467-745478:+	1.58571	-1.22367	0.522729	NA
[truncated: 42,964 more rows]

## Sheet: legend
Supplemental Table S2. Text file with differential expression for the presence of 5’ cap molecules in polyribosome fractions with respect the total extract. Experiment were performed in the wild-type strain (BY4741).
TSS_cluster	Genomic position of TSS clusters
baseMean	baseMean expression as defined by DESeq2
log2FoldChange_polyribosome_vs_total	Log2 fold change as measured by DESeq2
pvalue	p-value as measured by DESeq2
padj	adjusted p-value as measured by DESeq2
